# Supplementary material for: Chromium-catalyzed allylic defluorinative acylation of trifluoromethyl-substituted alkenes with acyl oxime esters
Source: Royal Society of Chemistry journal article supplement (doi:10.1039/d3qo01331f), 2023-01-01

## **Supporting Information**

# **Chromium-Catalyzed Allylic Defluorinative Acylation of Trifluoromethyl-Substituted Alkenes with Acyl Oxime Esters**

Hongzhang Shi, Haiyan Dong, and Chuan Wang\*

Department of Chemistry, University of Science and Technology of China, Hefei,  
Anhui 230026, P. R. China

E-mail: [chuanw@ustc.edu.cn](mailto:chuanw@ustc.edu.cn)

### **Table of Contents**

|                                                                                                                                                  |     |
|--------------------------------------------------------------------------------------------------------------------------------------------------|-----|
| General Information .....                                                                                                                        | S2  |
| Preparation of Substrates .....                                                                                                                  | S3  |
| General Procedure for Chromium-Catalyzed Allylic Defluorinative Acylation of<br>Trifluoromethyl-Substituted Alkenes with Acyl Oxime Esters ..... | S4  |
| Characterization Data of <i>gem</i> -Difluoroalkenes 3 .....                                                                                     | S5  |
| Control Experiments.....                                                                                                                         | S27 |
| Kinetic Studies .....                                                                                                                            | S33 |
| References.....                                                                                                                                  | S38 |
| <sup>1</sup> H-, <sup>13</sup> C-, and <sup>19</sup> F-NMR Spectra.....                                                                          | S39 |

## General Information

Unless otherwise noted, all reagents were purchased from commercial suppliers and used without further purification.  $^1\text{H}$ -NMR and  $^{13}\text{C}$  NMR spectra were recorded on a Bruker Advance 400M or 500M NMR spectrometers at ambient temperature in  $\text{CDCl}_3$  at 400 and 101 MHz or at 500 and 126 MHz.  $^{19}\text{F}$  NMR were reported as  $^{19}\text{F}$  exp. comp. pulse decoupling (F19CPD) unless otherwise noted. The chemical shifts are given in ppm relative to tetramethylsilane [ $^1\text{H}$ :  $\delta$  ( $\text{SiMe}_4$ ) = 0.00 ppm] as an internal standard or relative to the resonance of the solvent [ $^1\text{H}$ :  $\delta$  ( $\text{CDCl}_3$ ) = 7.26,  $^{13}\text{C}$ :  $\delta$  ( $\text{CDCl}_3$ ) = 77.16 ppm]. Multiplicities were given as: s (singlet); d (doublet); t (triplet); q (quartet); quin (quintet); dd (doublet of doublets); dt (doublet of triplets); m (multiplets), etc. Coupling constants are reported as  $J$  values in Hz. High resolution mass spectral analysis (HRMS) was performed on Waters XEVO G2 Q-TOF. Flash chromatography was performed using 200-300 mesh silica gel with the indicated solvent system.

Unless otherwise noted, all reagents and starting materials were purchased from commercial vendors and used without further purification.

## Preparation of Substrates

### Synthesis of Trifluoromethyl-Substituted Alkenes

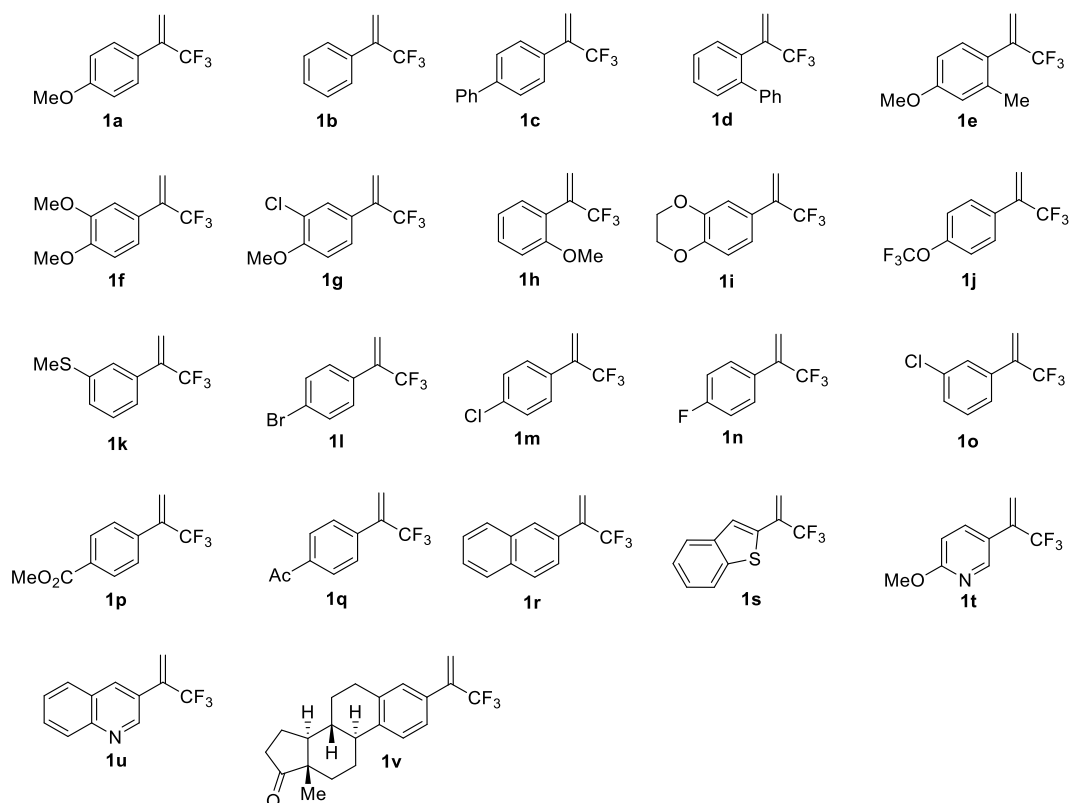

The trifluoromethyl-substituted alkenes **1a-e**,<sup>1</sup> **1f-j**,<sup>2</sup> **1k-u**,<sup>1</sup> and **1v**<sup>2</sup> are known compounds in the literature.

### Synthesis of Oxime Esters

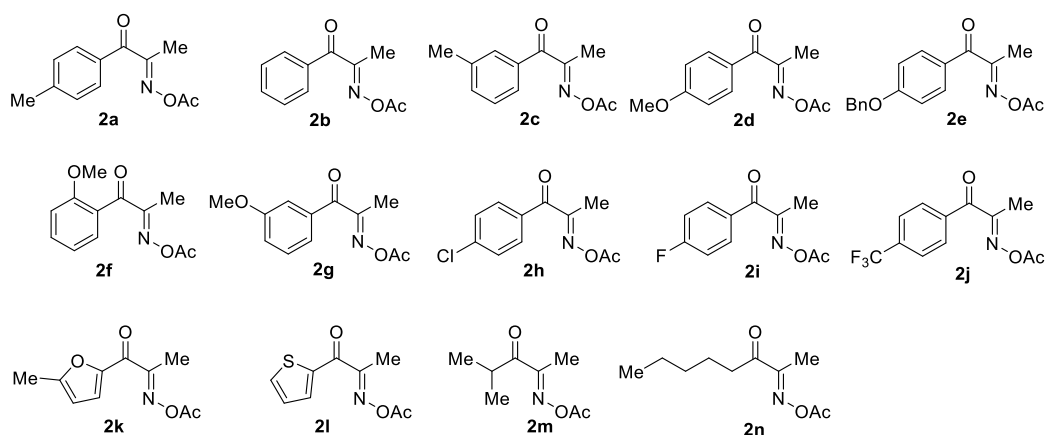

The Oxime Esters **1a-j**,<sup>3</sup> and **1k-n**<sup>4</sup> are known compounds in the literature.

# General Procedure for Chromium-Catalyzed Allylic Defluorinative Acylation of Trifluoromethyl-Substituted Alkenes with Acyl Oxime Esters

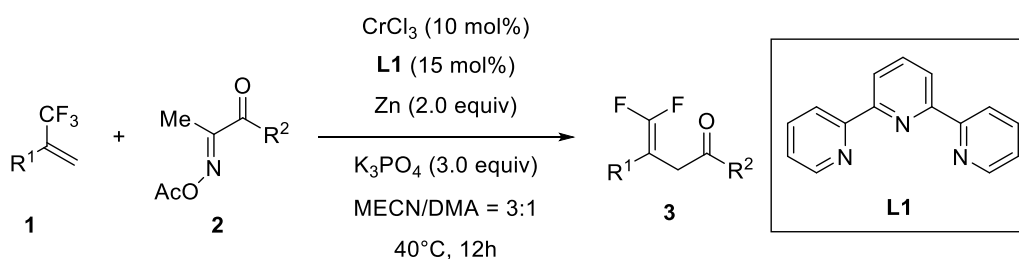

$\text{CrCl}_3$  (3.2 mg, 0.02 mmol, 10 mol%), 2,2':6',2''-terpyridine (**L1**) (7.0 mg, 0.03 mmol, 15 mol %), Zn (26.0 mg, 0.4 mmol, 2.0 equiv),  $\text{K}_3\text{PO}_4$  (127.0 mg, 0.6 mmol, 3.0 equiv), and the oxime esters **2** (0.4 mmol, 2.0 equiv) were placed in a Schlenk tube equipped with a stir bar. Next, the Schlenk tube was evacuated and filled with nitrogen (three cycles). To this mixture,  $\text{CH}_3\text{CN/DMA}$  (3:1) (1.0 mL) was added under nitrogen atmosphere. After stirring at 40 °C for 15 minutes, the trifluoromethyl-substituted alkenes **1** (0.2 mmol, 1.0 equiv) were added under a positive flow of nitrogen. The reaction mixture was stirred at 40 °C for 12 hours before it was quenched by addition of water. The aqueous phase was extracted with ethyl acetate (3×20 mL). The combined organic phases were washed with brine, dried over  $\text{Na}_2\text{SO}_4$ , filtered, and concentrated in vacuo. The crude materials were purified through column chromatography on silica gel (petroleum ether/ethyl acetate) to give the *gem*-difluoroalkenes **3** as the products.



## Characterization Data of *gem*-Difluoroalkenes 3

### 4,4-Difluoro-3-(4-methoxyphenyl)-1-(*p*-tolyl)but-3-en-1-one (3aa)

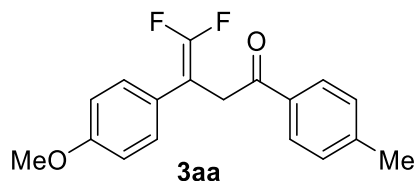

The title compound **3aa** was isolated through column chromatography (silica gel, petroleum ether/ethyl acetate 10:1) as a colorless oil (48.3 mg, 80%).

**<sup>1</sup>H NMR (400 MHz, Chloroform-*d*)**  $\delta$  = 7.87 (d,  $J$  = 8.1 Hz, 2H), 7.29–7.22 (m, 4H), 6.85 (d,  $J$  = 8.8 Hz, 2H), 4.01 (s, 2H), 3.78 (s, 3H), 2.42 (s, 3H) ppm.

**<sup>13</sup>C NMR (126 MHz, Chloroform-*d*)**  $\delta$  = 195.3 (t,  $J$  = 2.9 Hz), 158.9, 154.6 (dd,  $J$  = 291.1, 287.5 Hz), 144.4, 134.0, 129.5(2C), 129.3 (t,  $J$  = 3.5 Hz, 2C), 128.4 (2C), 125.8 (t,  $J$  = 3.9 Hz), 114.0 (2C), 86.9 (dd,  $J$  = 21.9, 17.6 Hz), 55.3, 38.4 (d,  $J$  = 2.3 Hz), 21.8 ppm.

**<sup>19</sup>F NMR (376 MHz, Chloroform-*d*)**  $\delta$  = -89.39 (d,  $J$  = 40.1 Hz, 1F), -90.20 (d,  $J$  = 40.0 Hz, 1F) ppm.

**HRMS (ESI)**  $m/z$  calculated for C<sub>18</sub>H<sub>16</sub>F<sub>2</sub>O<sub>2</sub>Na [M+Na]<sup>+</sup>: 325.1011, found: 325.1011.

### 4,4-Difluoro-3-(4-methoxyphenyl)-1-phenylbut-3-en-1-one (3ab)

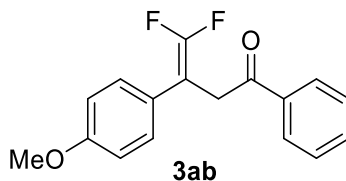

The title compound **3ab** was isolated through column chromatography (silica gel, petroleum ether/ethyl acetate 10:1) as a colorless oil (32.8mg, 57%).

**<sup>1</sup>H NMR (400 MHz, Chloroform-*d*)**  $\delta$  = 7.97 (d,  $J$  = 7.1 Hz, 2H), 7.59 (t,  $J$  = 7.4 Hz, 1H), 7.47 (t,  $J$  = 7.6 Hz, 2H), 7.24 (d,  $J$  = 8.7 Hz, 2H), 6.86 (d,  $J$  = 8.8 Hz, 2H), 4.03 (s, 2H), 3.78 (s, 3H) ppm.

**<sup>13</sup>C NMR (126 MHz, Chloroform-*d*)**  $\delta$  = 195.7 (t,  $J$  = 3.0 Hz), 158.9, 154.7 (dd,  $J$  =

291.0, 287.4 Hz), 136.4, 133.6, 129.3 (t,  $J = 3.5$  Hz, 2C), 128.8 (2C), 128.3 (2C), 125.7 (t,  $J = 3.9$  Hz), 114.1 (2C), 86.8 (dd,  $J = 21.9, 17.8$  Hz), 55.4, 38.6 (d,  $J = 2.4$  Hz) ppm.  
 **$^{19}\text{F}$  NMR (376 MHz, Chloroform-*d*)**  $\delta = -89.29$  (d,  $J = 39.6$  Hz, 1F),  $-90.11$  (d,  $J = 39.6$  Hz, 1F) ppm.

**HRMS (ESI)**  $m/z$  calculated for  $\text{C}_{17}\text{H}_{15}\text{F}_2\text{O}_2$   $[\text{M}+\text{H}]^+$ : 289.1035, found: 289.1039.

#### 4,4-Difluoro-3-(4-methoxyphenyl)-1-(*m*-tolyl)but-3-en-1-one (3ac)

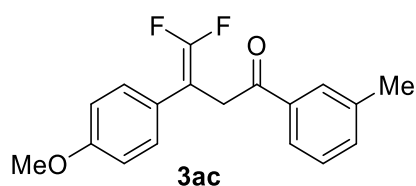

The title compound **3ac** was isolated through column chromatography (silica gel, petroleum ether/ethyl acetate 10:1) as a colorless oil (45.3 mg, 75%).

**$^1\text{H}$  NMR (400 MHz, Chloroform-*d*)**  $\delta = 7.79$ – $7.74$  (m, 2H),  $7.42$ – $7.33$  (m, 2H),  $7.24$  (d,  $J = 8.6$  Hz, 2H),  $6.85$  (d,  $J = 8.8$  Hz, 2H),  $4.02$  (s, 2H),  $3.78$  (s, 3H),  $2.40$  (s, 3H) ppm.

**$^{13}\text{C}$  NMR (126 MHz, Chloroform-*d*)**  $\delta = 195.8$  (t,  $J = 2.8$  Hz), 158.8, 154.6 (dd,  $J = 291.2, 287.4$  Hz), 138.6, 136.4, 134.2, 129.2 (t,  $J = 3.5$  Hz, 2C), 128.7, 128.6, 125.7 (t,  $J = 3.9$  Hz), 125.4, 113.9 (2C), 86.8 (dd,  $J = 22.0, 17.6$  Hz), 55.2, 38.5 (d,  $J = 2.5$  Hz), 21.4 ppm.

**$^{19}\text{F}$  NMR (376 MHz, Chloroform-*d*)**  $\delta = -89.34$  (d,  $J = 39.7$  Hz, 1F),  $-90.12$  (d,  $J = 39.6$  Hz, 1F) ppm.

**HRMS (ESI)**  $m/z$  calculated for  $\text{C}_{18}\text{H}_{16}\text{F}_2\text{O}_2\text{Na}$   $[\text{M}+\text{Na}]^+$ : 325.1011, found: 325.1017.

#### 1-(4-(Benzyloxy)phenyl)-4,4-difluoro-3-(4-methoxyphenyl)but-3-en-1-one (3ad)

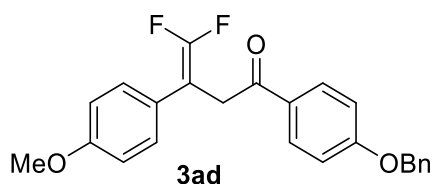

The title compound **3ad** was isolated through column chromatography (silica gel,

petroleum ether/ethyl acetate 10:1) as a colorless oil (64.6 mg, 82%).

**<sup>1</sup>H NMR (500 MHz, Chloroform-*d*)**  $\delta$  = 7.96 (d, *J* = 8.8 Hz, 2H), 7.47–7.32 (m, 5H), 7.25 (d, *J* = 8.5 Hz, 2H), 7.02 (d, *J* = 8.8 Hz, 2H), 6.86 (d, *J* = 8.8 Hz, 2H), 5.14 (s, 2H), 3.98 (s, 2H), 3.78 (s, 3H) ppm.

**<sup>13</sup>C NMR (126 MHz, Chloroform-*d*)**  $\delta$  = 194.2 (t, *J* = 2.8 Hz), 162.9, 158.8, 154.6 (dd, *J* = 291.0, 287.3 Hz), 136.2, 130.6 (2C), 129.7, 129.3 (t, *J* = 3.5 Hz, 2C), 128.8 (2C), 128.4, 127.6 (2C), 125.8 (t, *J* = 3.9 Hz), 114.8 (2C), 114.0 (2C), 87.0 (dd, *J* = 21.9, 17.5 Hz), 70.3, 55.3, 38.2 (d, *J* = 2.3 Hz) ppm.

**<sup>19</sup>F NMR (471 MHz, Chloroform-*d*)**  $\delta$  = -89.42 (d, *J* = 40.0 Hz, 1F), -90.22 (d, *J* = 39.9 Hz, 1F) ppm.

**HRMS (ESI)** *m/z* calculated for C<sub>24</sub>H<sub>21</sub>F<sub>2</sub>O<sub>3</sub> [M+H]<sup>+</sup>: 395.1453, found: 395.1465.

#### 4,4-Difluoro-1,3-bis(4-methoxyphenyl)but-3-en-1-one (3ae)

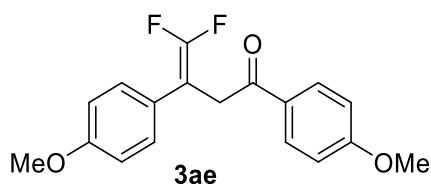

The title compound **3ae** was isolated through column chromatography (silica gel, petroleum ether/ethyl acetate 10:1) as a colorless oil (60.4 mg, 95%).

**<sup>1</sup>H NMR (400 MHz, Chloroform-*d*)**  $\delta$  = 7.95 (d, *J* = 8.9 Hz, 2H), 7.24 (d, *J* = 7.7 Hz, 2H), 6.94 (d, *J* = 8.9 Hz, 2H), 6.85 (d, *J* = 8.8 Hz, 2H), 3.98 (s, 2H), 3.87 (s, 3H), 3.78 (s, 3H) ppm.

**<sup>13</sup>C NMR (101 MHz, Chloroform-*d*)**  $\delta$  = 194.2 (t, *J* = 2.8 Hz), 163.8, 158.8, 154.6 (dd, *J* = 290.9, 287.3 Hz), 130.6 (2C), 129.5, 129.3 (t, *J* = 3.5 Hz, 2C), 125.8 (t, *J* = 3.9 Hz), 114.03 (2C), 113.96 (2C), 87.1 (dd, *J* = 21.9, 17.5 Hz), 55.6, 55.3, 38.2 (d, *J* = 2.4 Hz) ppm.

**<sup>19</sup>F NMR (376 MHz, Chloroform-*d*)**  $\delta$  = -89.48 (d, *J* = 40.0 Hz, 1F), -90.28 (d, *J* = 40.1 Hz, 1F) ppm.

**HRMS (ESI)** *m/z* calculated for C<sub>18</sub>H<sub>16</sub>F<sub>2</sub>O<sub>3</sub>Na [M+Na]<sup>+</sup>: 341.0960, found: 341.0968.

#### 4,4-Difluoro-1-(2-methoxyphenyl)-3-(4-methoxyphenyl)but-3-en-1-one (3af)

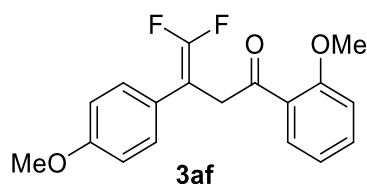

The title compound **3af** was isolated through column chromatography (silica gel, petroleum ether/ethyl acetate 10:1) as a colorless oil (41.4 mg, 65%).

**<sup>1</sup>H NMR (400 MHz, Chloroform-*d*)**  $\delta$  = 7.64 (d,  $J$  = 7.6 Hz, 1H), 7.47 (t,  $J$  = 7.8 Hz, 1H), 7.22 (d,  $J$  = 8.7 Hz, 2H), 7.01–6.95 (m, 2H), 6.84 (d,  $J$  = 8.8 Hz, 2H), 4.05 (s, 2H), 3.90 (s, 3H), 3.78 (s, 3H) ppm.

**<sup>13</sup>C NMR (101 MHz, Chloroform-*d*)**  $\delta$  = 198.0 (t,  $J$  = 2.9 Hz), 158.7 (2C), 154.7 (dd,  $J$  = 290.9, 287.2 Hz), 133.9, 130.7, 129.2 (t,  $J$  = 3.5 Hz, 2C), 127.7, 126.1 (t,  $J$  = 4.0 Hz), 120.9, 113.9 (2C), 111.5, 87.3 (dd,  $J$  = 22.2, 16.7 Hz), 55.6, 55.3, 43.4 (d,  $J$  = 2.4 Hz) ppm.

**<sup>19</sup>F NMR (376 MHz, Chloroform-*d*)**  $\delta$  = -89.65 (d,  $J$  = 39.9 Hz, 1F), -90.72 (d,  $J$  = 40.2 Hz, 1F) ppm.

**HRMS (ESI)**  $m/z$  calculated for C<sub>18</sub>H<sub>16</sub>F<sub>2</sub>O<sub>3</sub>Na [M+Na]<sup>+</sup>: 341.0960, found: 341.0962.

#### 4,4-Difluoro-1-(3-methoxyphenyl)-3-(4-methoxyphenyl)but-3-en-1-one (3ag)

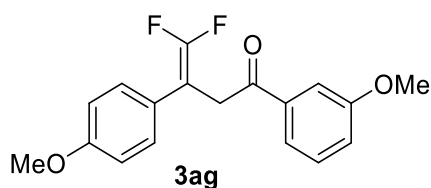

The title compound **3ag** was isolated through column chromatography (silica gel, petroleum ether/ethyl acetate 10:1) as a colorless oil (38.8 mg, 61%).

**<sup>1</sup>H NMR (400 MHz, Chloroform-*d*)**  $\delta$  = 7.33 (d,  $J$  = 7.7 Hz, 1H), 7.26 (s, 1H), 7.16 (t,  $J$  = 7.9 Hz, 1H), 7.02 (d,  $J$  = 8.4 Hz, 2H), 6.91 (d,  $J$  = 6.7 Hz, 1H), 6.64 (d,  $J$  = 8.2 Hz, 2H), 3.80 (s, 2H), 3.62 (s, 3H), 3.56 (s, 3H) ppm.

**<sup>13</sup>C NMR (126 MHz, Chloroform-*d*)**  $\delta$  = 195.5 (t,  $J$  = 2.9 Hz), 160.0, 158.9, 154.7 (dd,

$J = 291.1, 287.5$  Hz), 137.8, 129.8, 129.3 (t,  $J = 3.5$  Hz, 2C), 125.7 (t,  $J = 3.9$  Hz), 120.8, 120.1, 114.1 (2C), 112.5, 86.9 (dd,  $J = 21.7, 17.9$  Hz), 55.6, 55.4, 38.7 (d,  $J = 2.5$  Hz) ppm.

**$^{19}\text{F}$  NMR (376 MHz, Chloroform-*d*)**  $\delta = -89.30$  (d,  $J = 39.9$  Hz, 1F),  $-90.13$  (d,  $J = 40.0$  Hz, 1F) ppm.

**HRMS (ESI)**  $m/z$  calculated for  $\text{C}_{18}\text{H}_{17}\text{F}_2\text{O}_3$   $[\text{M}+\text{H}]^+$ : 319.1140, found: 319.1167.

### 1-(4-Chlorophenyl)-4,4-difluoro-3-(4-methoxyphenyl)but-3-en-1-one (3ah)

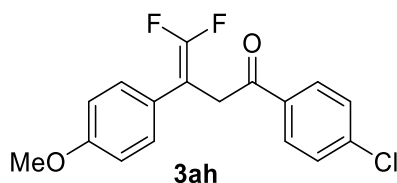

The title compound **3ah** was isolated through column chromatography (silica gel, petroleum ether/ethyl acetate 10:1) as a colorless oil (34.8 mg, 54%).

**$^1\text{H}$  NMR (400 MHz, Chloroform-*d*)**  $\delta = 7.89$  (d,  $J = 11.0$  Hz, 2H), 7.44 (d,  $J = 10.8$  Hz, 2H), 7.21 (d,  $J = 9.7$  Hz, 2H), 6.85 (d,  $J = 11.0$  Hz, 2H), 3.99 (s, 2H), 3.78 (s, 3H) ppm.

**$^{13}\text{C}$  NMR (126 MHz, Chloroform-*d*)**  $\delta = 194.6$  (t,  $J = 2.8$  Hz), 159.0, 154.6 (dd,  $J = 291.1, 288.7$  Hz), 140.1, 134.7, 129.7 (2C), 129.3 (t,  $J = 3.4$  Hz, 2C), 129.2 (2C), 125.4 (t,  $J = 3.8$  Hz), 114.1 (2C), 86.7 (dd,  $J = 21.8, 18.1$  Hz), 55.4, 38.6 (d,  $J = 2.3$  Hz) ppm.

**$^{19}\text{F}$  NMR (376 MHz, Chloroform-*d*)**  $\delta = -89.09$  (d,  $J = 39.5$  Hz, 1F),  $-89.89$  (d,  $J = 39.7$  Hz, 1F) ppm.

**HRMS (ESI)**  $m/z$  calculated for  $\text{C}_{17}\text{H}_{14}^{35}\text{ClF}_2\text{O}_2$   $[\text{M}+\text{H}]^+$ : 323.0645, found: 323.0617.

### 4,4-Difluoro-1-(4-fluorophenyl)-3-(4-methoxyphenyl)but-3-en-1-one (3ai)

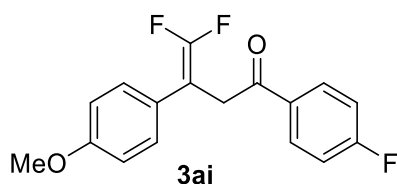

The title compound **3ai** was isolated through column chromatography (silica gel,

petroleum ether/ethyl acetate 10:1) as a colorless oil (23.3 mg, 38%).

**<sup>1</sup>H NMR (400 MHz, Chloroform-*d*)**  $\delta$  = 7.99 (dd,  $J$  = 8.8, 5.4 Hz, 2H), 7.23 (d,  $J$  = 8.2 Hz, 2H), 7.14 (t,  $J$  = 8.6 Hz, 2H), 6.86 (d,  $J$  = 8.8 Hz, 2H), 4.00 (s, 2H), 3.78 (s, 3H) ppm.

**<sup>13</sup>C NMR (126 MHz, Chloroform-*d*)**  $\delta$  = 194.2 (t,  $J$  = 2.8 Hz), 166.0 (d,  $J$  = 255.3 Hz), 159.0, 154.6 (dd,  $J$  = 291.7, 287.6 Hz), 132.8 (d,  $J$  = 3.1 Hz), 131.0 (d,  $J$  = 9.3 Hz, 2C), 129.3 (t,  $J$  = 3.5 Hz, 2C), 125.5 (t,  $J$  = 3.8 Hz), 116.0 (d,  $J$  = 22.0 Hz, 2C), 114.1 (2C), 86.8 (dd,  $J$  = 21.7, 17.9 Hz), 55.4, 38.6 (d,  $J$  = 2.4 Hz) ppm.

**<sup>19</sup>F NMR (376 MHz, Chloroform-*d*)**  $\delta$  = -89.20 (d,  $J$  = 39.4 Hz, 1F), -90.00 (d,  $J$  = 39.4 Hz, 1F), -104.52 (s, 1F) ppm.

**HRMS (ESI)**  $m/z$  calculated for C<sub>17</sub>H<sub>15</sub>F<sub>3</sub>O<sub>2</sub> [M+H]<sup>+</sup>: 307.0940, found: 307.0951.

**4,4-Difluoro-3-(4-methoxyphenyl)-1-(4-(trifluoromethyl)phenyl)but-3-en-1-one**  
**(3aj)**

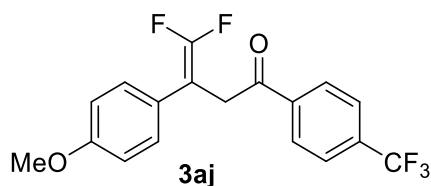

The title compound **3aj** was isolated through column chromatography (silica gel, petroleum ether/ethyl acetate 10:1) as a colorless oil (20.0 mg, 28%).

**<sup>1</sup>H NMR (400 MHz, Chloroform-*d*)**  $\delta$  = 8.05 (d,  $J$  = 8.2 Hz, 2H), 7.74 (d,  $J$  = 8.1 Hz, 2H), 7.22 (d,  $J$  = 8.4 Hz, 2H), 6.86 (d,  $J$  = 8.7 Hz, 2H), 4.05 (s, 2H), 3.79 (s, 3H) ppm.

**<sup>13</sup>C NMR (126 MHz, Chloroform-*d*)**  $\delta$  = 194.9 (t,  $J$  = 2.9 Hz), 159.1, 154.7 (dd,  $J$  = 291.7, 287.8 Hz), 139.0, 134.8 (q,  $J$  = 32.8 Hz), 129.3 (t,  $J$  = 3.4 Hz, 2C), 128.6 (2C), 125.9 (q,  $J$  = 3.7 Hz, 2C), 125.3 (t,  $J$  = 3.9 Hz), 123.6 (q,  $J$  = 272.6 Hz), 114.2 (2C), 86.6 (dd,  $J$  = 21.8, 18.2 Hz), 55.4, 39.0 (d,  $J$  = 2.4 Hz) ppm.

**<sup>19</sup>F NMR (376 MHz, Chloroform-*d*)**  $\delta$  = -63.15 (s, 3F), -88.87 (d,  $J$  = 38.5 Hz, 1F), -89.68 (d,  $J$  = 38.5 Hz, 1F) ppm.

**HRMS (ESI)**  $m/z$  calculated for C<sub>18</sub>H<sub>13</sub>F<sub>5</sub>O<sub>2</sub>Na [M+Na]<sup>+</sup>: 379.0728, found: 379.0757.

#### 4,4-Difluoro-3-(4-methoxyphenyl)-1-(5-methylfuran-2-yl)but-3-en-1-one (3ak)

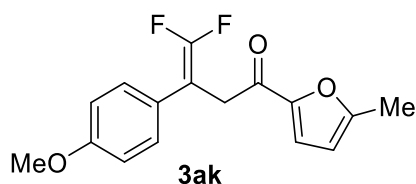

The title compound **3ak** was isolated through column chromatography (silica gel, petroleum ether/ethyl acetate 10:1) as a colorless oil (44.4 mg, 76%).

**<sup>1</sup>H NMR (400 MHz, Chloroform-*d*)**  $\delta$  = 7.25 (d, *J* = 8.5 Hz, 2H), 7.13 (d, *J* = 3.5 Hz, 1H), 6.85 (d, *J* = 8.8 Hz, 2H), 6.16 (d, *J* = 3.4 Hz, 1H) 3.83 (s, 2H), 3.78 (s, 3H), 2.39 (s, 3H) ppm.

**<sup>13</sup>C NMR (101 MHz, Chloroform-*d*)**  $\delta$  = 184.2 (t, *J* = 3.0 Hz), 158.9, 158.1, 154.8 (dd, *J* = 291.2, 288.0 Hz), 151.1, 129.4 (t, *J* = 3.4 Hz, 2C), 125.6 (t, *J* = 3.8 Hz), 119.6, 114.0 (2C), 109.3, 86.7 (dd, *J* = 21.7, 18.0 Hz), 55.4, 38.0 (d, *J* = 2.3 Hz), 14.2 ppm.

**<sup>19</sup>F NMR (376 MHz, Chloroform-*d*)**  $\delta$  = -89.31 (d, *J* = 39.0 Hz, 1F), -89.86 (d, *J* = 39.0 Hz, 1F) ppm.

**HRMS (ESI)** *m/z* calculated for C<sub>16</sub>H<sub>14</sub>F<sub>2</sub>O<sub>3</sub>Na [M+Na]<sup>+</sup>: 315.0803, found: 315.0809.

#### 4,4-Difluoro-3-(4-methoxyphenyl)-1-(thiophen-2-yl)but-3-en-1-one (3al)

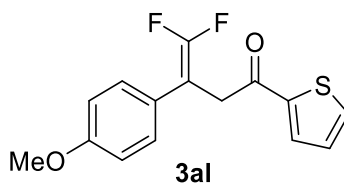

The title compound **3al** was isolated through column chromatography (silica gel, petroleum ether/ethyl acetate 10:1) as a colorless oil (38.8 mg, 44%).

**<sup>1</sup>H NMR (400 MHz, Chloroform-*d*)**  $\delta$  = 7.76 (d, *J* = 3.6 Hz, 1H), 7.66 (d, *J* = 4.9 Hz, 1H), 7.26 (d, *J* = 8.3 Hz, 2H), 7.14 (t, *J* = 4.4 Hz, 1H), 6.86 (d, *J* = 8.8 Hz, 2H), 3.96 (s, 2H), 3.78 (s, 3H) ppm.

**<sup>13</sup>C NMR (126 MHz, Chloroform-*d*)**  $\delta$  = 188.6 (t, *J* = 3.0 Hz), 159.0, 154.8 (dd, *J* = 291.4, 287.9 Hz), 143.4, 134.2, 132.3, 129.4 (t, *J* = 3.5 Hz, 2C), 128.3, 125.5 (t, *J* = 3.8

Hz), 114.1 (2C), 86.8 (dd,  $J = 21.6, 18.2$  Hz), 55.4, 39.2 (d,  $J = 2.3$  Hz) ppm.

**$^{19}\text{F}$  NMR (376 MHz, Chloroform-*d*)**  $\delta = -88.97$  (d,  $J = 38.7$  Hz, 1F),  $-89.79$  (d,  $J = 38.4$  Hz, 1F) ppm.

**HRMS (ESI)**  $m/z$  calculated for  $\text{C}_{15}\text{H}_{12}\text{F}_2\text{O}_2\text{SNa}$   $[\text{M}+\text{Na}]^+$ : 317.0418, found: 317.0421.

### 6,6-Difluoro-5-(4-methoxyphenyl)-2-methylhex-5-en-3-one (3am)

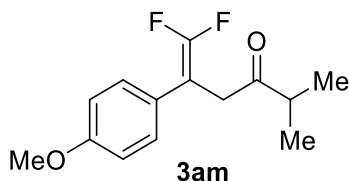

The title compound **3am** was isolated through column chromatography (silica gel, petroleum ether/ethyl acetate 10:1) as a colorless oil (31.0 mg, 61%).

**$^1\text{H}$  NMR (400 MHz, Chloroform-*d*)**  $\delta = 7.20$  (d,  $J = 7.7$  Hz, 2H), 6.87 (d,  $J = 8.8$  Hz, 2H), 3.79 (s, 3H), 3.48 (s, 2H), 2.73 – 2.62 (m, 1H), 1.08 (d,  $J = 6.9$  Hz, 6H) ppm.

**$^{13}\text{C}$  NMR (126 MHz, Chloroform-*d*)**  $\delta = 210.5$  (t,  $J = 2.8$  Hz), 158.9, 154.7 (dd,  $J = 291.5, 287.3$  Hz), 129.2 (t,  $J = 3.5$  Hz, 2C), 125.7 (t,  $J = 3.9$  Hz), 114.1 (2C), 86.8 (dd,  $J = 22.1, 17.1$  Hz), 55.4, 40.3, 40.2 (d,  $J = 2.2$  Hz), 18.3 (2C) ppm.

**$^{19}\text{F}$  NMR (376 MHz, Chloroform-*d*)**  $\delta = -89.64$  (d,  $J = 39.9$  Hz, 1F),  $-90.53$  (d,  $J = 40.0$  Hz, 1F) ppm.

**HRMS (ESI)**  $m/z$  calculated for  $\text{C}_{14}\text{H}_{16}\text{F}_2\text{O}_2\text{Na}$   $[\text{M}+\text{Na}]^+$ : 277.1011, found: 277.1009.

### 1,1-Difluoro-2-(4-methoxyphenyl)non-1-en-4-one (3an)

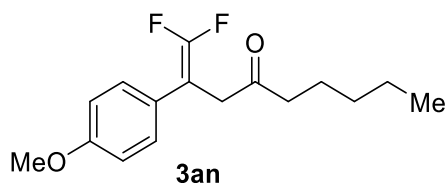

The title compound **3an** was isolated through column chromatography (silica gel, petroleum ether/ethyl acetate 10:1) as a colorless oil (52.5 mg, 93%).

**$^1\text{H}$  NMR (500 MHz, Chloroform-*d*)**  $\delta = 7.22$  (d,  $J = 8.1$  Hz, 2H), 6.87 (d,  $J = 8.8$  Hz,



2H), 3.80 (s, 3H), 3.41 (s, 2H), 2.42 (t,  $J = 7.4$  Hz, 2H), 1.59–1.49 (m, 2H), 1.32–1.17 (m, 4H), 0.86 (t,  $J = 7.1$  Hz, 3H) ppm.

$^{13}\text{C}$  NMR (126 MHz, Chloroform-*d*)  $\delta = 207.3$  (t,  $J = 2.8$  Hz), 158.9, 154.6 (dd,  $J = 291.9, 287.4$  Hz), 129.1 (t,  $J = 3.5$  Hz, 2C), 125.4 (t,  $J = 3.9$  Hz), 114.1 (2C), 86.9 (dd,  $J = 22.1, 16.7$  Hz), 55.4, 42.4 (d,  $J = 1.9$  Hz), 42.1, 31.4, 23.4, 22.5, 14.0 ppm.

$^{19}\text{F}$  NMR (471 MHz, Chloroform-*d*)  $\delta = -89.25$  (d,  $J = 39.4$  Hz, 1F),  $-90.26$  (d,  $J = 39.4$  Hz, 1F) ppm.

HRMS (ESI)  $m/z$  calculated for  $\text{C}_{16}\text{H}_{20}\text{F}_2\text{O}_2\text{Na}$   $[\text{M}+\text{Na}]^+$ : 305.1324, found: 305.1318.

#### 4,4-Difluoro-1-(4-methoxyphenyl)-3-phenylbut-3-en-1-one (3be)

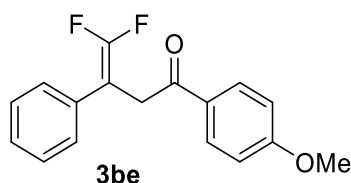

The title compound **3be** was isolated through column chromatography (silica gel, petroleum ether/ethyl acetate 10:1) as a colorless oil (48.4 mg, 84%).

$^1\text{H}$  NMR (500 MHz, Chloroform-*d*)  $\delta = 7.96$  (d,  $J = 8.9$  Hz, 2H), 7.35–7.30 (m, 4H), 7.28–7.22 (m, 1H), 6.95 (d,  $J = 8.8$  Hz, 2H), 4.02 (s, 2H), 3.87 (s, 3H) ppm.

$^{13}\text{C}$  NMR (126 MHz, Chloroform-*d*)  $\delta = 194.0$  (t,  $J = 2.8$  Hz), 163.8, 154.8 (dd,  $J = 292.3, 288.0$  Hz), 133.7 (t,  $J = 4.0$  Hz), 130.6 (2C), 129.4, 128.6 (2C), 128.1 (t,  $J = 3.4$  Hz, 2C), 127.5, 114.0 (2C), 87.5 (dd,  $J = 21.8, 17.1$  Hz), 55.6, 38.1 (d,  $J = 2.4$  Hz) ppm.

$^{19}\text{F}$  NMR (471 MHz, Chloroform-*d*)  $\delta = -88.27$  (d,  $J = 37.5$  Hz, 1F),  $-89.28$  (d,  $J = 37.3$  Hz, 1F) ppm.

HRMS (ESI)  $m/z$  calculated for  $\text{C}_{17}\text{H}_{14}\text{F}_2\text{O}_2\text{Na}$   $[\text{M}+\text{Na}]^+$ : 311.0854, found: 311.0854.

#### 3-([1,1'-Biphenyl]-4-yl)-4,4-difluoro-1-(4-methoxyphenyl)but-3-en-1-one (3ce)

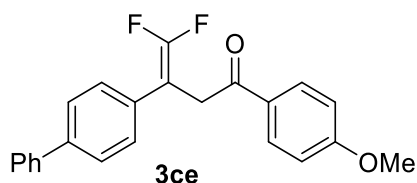

The title compound **3ce** was isolated through column chromatography (silica gel, petroleum ether/ethyl acetate 10:1) as a colorless oil (59.7 mg, 82%).

**<sup>1</sup>H NMR (500 MHz, Chloroform-*d*)**  $\delta$  = 7.99 (d,  $J$  = 8.9 Hz, 2H), 7.62–7.53 (m, 4H), 7.47–7.39 (m, 4H), 7.37–7.33 (m, 1H), 6.96 (d,  $J$  = 8.9 Hz, 2H), 4.07 (s, 2H), 3.88 (s, 3H) ppm.

**<sup>13</sup>C NMR (126 MHz, Chloroform-*d*)**  $\delta$  = 194.0 (t,  $J$  = 2.7 Hz), 163.9, 154.9 (dd,  $J$  = 292.8, 288.1 Hz), 140.6, 140.2, 132.6 (t,  $J$  = 4.1 Hz), 130.6 (2C), 129.4, 128.9 (2C), 128.4 (t,  $J$  = 3.6 Hz, 2C), 127.5, 127.3 (2C), 127.1 (2C), 114.0 (2C), 87.3 (dd,  $J$  = 22.0, 16.9 Hz), 55.6, 37.9 (d,  $J$  = 2.4 Hz) ppm.

**<sup>19</sup>F NMR (471 MHz, Chloroform-*d*)**  $\delta$  = -87.68 (d,  $J$  = 36.7 Hz, 1F), -88.64 (d,  $J$  = 36.6 Hz, 1F) ppm.

**HRMS (ESI)**  $m/z$  calculated for C<sub>23</sub>H<sub>18</sub>F<sub>2</sub>O<sub>2</sub>Na [M+Na]<sup>+</sup>: 387.1167, found: 387.1165.

### 3-([1,1'-Biphenyl]-2-yl)-4,4-difluoro-1-(4-methoxyphenyl)but-3-en-1-one (**3de**)

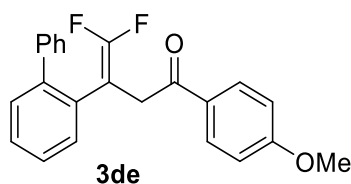

The title compound **3de** was isolated through column chromatography (silica gel, petroleum ether/ethyl acetate 10:1) as a colorless oil (59.9 mg, 82%).

**<sup>1</sup>H NMR (500 MHz, Chloroform-*d*)**  $\delta$  = 7.68 (d,  $J$  = 8.9 Hz, 2H), 7.53–7.29 (m, 9H), 6.85 (d,  $J$  = 8.8 Hz, 2H), 3.83 (s, 3H), 3.39 (s, 2H) ppm.

**<sup>13</sup>C NMR (126 MHz, Chloroform-*d*)**  $\delta$  = 193.9 (t,  $J$  = 2.8 Hz), 163.5, 154.7 (dd,  $J$  = 289.4, 287.2 Hz), 141.2 (d,  $J$  = 3.1 Hz), 141.1, 131.7 (dd,  $J$  = 4.5, 2.2 Hz), 131.6 (t,  $J$  = 2.3 Hz, 2C), 130.4 (2C), 130.2, 129.4, 128.9, 128.4 (2C), 128.3, 127.5, 127.4, 113.7 (2C), 87.6 (dd,  $J$  = 22.3, 21.1 Hz), 55.5, 37.8 (d,  $J$  = 2.1 Hz) ppm.

**<sup>19</sup>F NMR (471 MHz, Chloroform-*d*)**  $\delta$  = -89.02 (d,  $J$  = 38.6 Hz, 1F), -90.78 (d,  $J$  = 38.9 Hz, 1F) ppm.

**HRMS (ESI)**  $m/z$  calculated for C<sub>23</sub>H<sub>18</sub>F<sub>2</sub>O<sub>2</sub>Na [M+Na]<sup>+</sup>: 387.1167, found: 387.1172.

**4,4-Difluoro-3-(4-methoxy-2-methylphenyl)-1-(4-methoxyphenyl)but-3-en-1-one**  
**(3ee)**

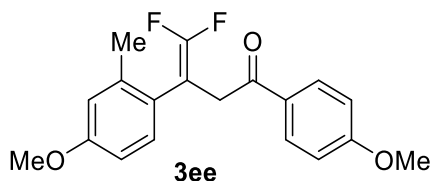

The title compound **3ee** was isolated through column chromatography (silica gel, petroleum ether/ethyl acetate 10:1) as a colorless oil (57.1 mg, 86%).

**<sup>1</sup>H NMR (400 MHz, Chloroform-*d*)**  $\delta$  = 7.89 (d, *J* = 8.9 Hz, 2H), 7.12 (d, *J* = 8.4 Hz, 1H), 6.91 (d, *J* = 8.9 Hz, 2H), 6.73 (d, *J* = 2.7 Hz, 1H), 6.71–6.67 (m, 1H), 3.89 (s, 2H), 3.86 (s, 3H), 3.76 (s, 3H), 2.30 (s, 3H) ppm.

**<sup>13</sup>C NMR (126 MHz, Chloroform-*d*)**  $\delta$  = 194.2 (t, *J* = 2.8 Hz), 163.7, 159.2, 153.9 (dd, *J* = 289.8, 286.6 Hz), 138.6, 130.9, 130.6 (2C), 129.5, 125.1 (dd, *J* = 4.7, 2.1 Hz), 115.7, 113.9 (2C), 111.4, 85.7 (dd, *J* = 22.1, 21.6 Hz), 55.6, 55.2, 39.2, 19.9 (d, *J* = 2.2 Hz) ppm.

**<sup>19</sup>F NMR (376 MHz, Chloroform-*d*)**  $\delta$  = -88.14 (d, *J* = 39.1 Hz, 1F), -91.26 (d, *J* = 39.1 Hz, 1F) ppm.

**HRMS (ESI)** *m/z* calculated for C<sub>19</sub>H<sub>19</sub>F<sub>2</sub>O<sub>3</sub> [M+H]<sup>+</sup>: 333.1297, found: 333.1302.

**3-(3,4-Dimethoxyphenyl)-4,4-difluoro-1-(4-methoxyphenyl)but-3-en-1-one (3fe)**

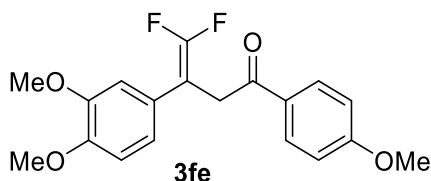

The title compound **3fe** was isolated through column chromatography (silica gel, petroleum ether/ethyl acetate 10:1) as a colorless oil (66.1 mg, 95%).

**<sup>1</sup>H NMR (400 MHz, Chloroform-*d*)**  $\delta$  = 7.95 (d, *J* = 8.9 Hz, 2H), 6.94 (d, *J* = 8.9 Hz, 2H), 6.87 (s, 1H), 6.84–6.78 (m, 2H), 3.98 (s, 2H), 3.87 (s, 3H), 3.84 (s, 3H), 3.83 (s, 3H) ppm.

**<sup>13</sup>C NMR (101 MHz, Chloroform-*d*)**  $\delta$  = 194.3 (t,  $J$  = 2.6 Hz), 163.8, 154.7 (dd,  $J$  = 290.9, 287.6 Hz), 148.8, 148.4, 130.6 (2C), 129.5, 126.1 (t,  $J$  = 3.8 Hz), 120.5 (t,  $J$  = 3.3 Hz), 114.0 (2C), 111.5 (t,  $J$  = 3.4 Hz), 111.1, 87.4 (dd,  $J$  = 21.9, 17.4 Hz), 55.95, 55.92, 55.6, 38.2 (d,  $J$  = 2.2 Hz).

**<sup>19</sup>F NMR (376 MHz, Chloroform-*d*)**  $\delta$  = -89.20 (d,  $J$  = 39.5 Hz, 1F), -89.68 (d,  $J$  = 39.7 Hz, 1F) ppm.

**HRMS (ESI)**  $m/z$  calculated for C<sub>19</sub>H<sub>18</sub>F<sub>2</sub>O<sub>4</sub>Na [M+Na]<sup>+</sup>: 371.1065, found: 371.1064

**3-(3-Chloro-4-methoxyphenyl)-4,4-difluoro-1-(4-methoxyphenyl)but-3-en-1-one (3ge)**

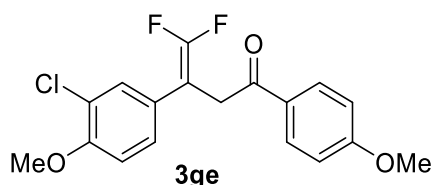

The title compound **3ge** was isolated through column chromatography (silica gel, petroleum ether/ethyl acetate 10:1) as a colorless oil (65.5 mg, 93%).

**<sup>1</sup>H NMR (500 MHz, Chloroform-*d*)**  $\delta$  = 7.95 (d,  $J$  = 8.7 Hz, 2H), 7.33 (s, 1H), 7.19 (d,  $J$  = 8.5 Hz, 1H), 6.94 (d,  $J$  = 8.8 Hz, 2H), 6.86 (d,  $J$  = 8.6 Hz, 1H), 3.97 (s, 2H), 3.87 (s, 3H), 3.86 (s, 3H) ppm.

**<sup>13</sup>C NMR (126 MHz, Chloroform-*d*)**  $\delta$  = 193.9 (t,  $J$  = 2.8 Hz), 163.9, 154.7 (dd,  $J$  = 291.8, 288.1 Hz), 154.2, 130.6 (2C), 129.8 (t,  $J$  = 3.7 Hz), 129.3, 127.7 (t,  $J$  = 3.5 Hz), 126.8 (t,  $J$  = 4.0 Hz), 122.4, 114.0 (2C), 111.9, 86.4 (dd,  $J$  = 22.7, 17.2 Hz), 56.2, 55.6, 37.9 (d,  $J$  = 2.3 Hz) ppm.

**<sup>19</sup>F NMR (471 MHz, Chloroform-*d*)**  $\delta$  = -88.40 (d,  $J$  = 37.8 Hz, 1F), -89.12 (d,  $J$  = 37.8 Hz, 1F) ppm.

**HRMS (ESI)**  $m/z$  calculated for C<sub>18</sub>H<sub>16</sub><sup>35</sup>ClF<sub>2</sub>O<sub>3</sub> [M+H]<sup>+</sup>: 353.0751, found: 353.0751.

**4,4-Difluoro-3-(2-methoxyphenyl)-1-(4-methoxyphenyl)but-3-en-1-one (3he)**

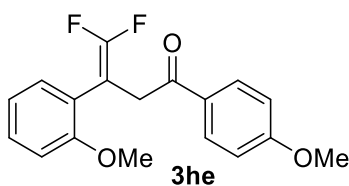

The title compound **3he** was isolated through column chromatography (silica gel, petroleum ether/ethyl acetate 10:1) as a colorless oil (48.4 mg, 76%).

**<sup>1</sup>H NMR (400 MHz, Chloroform-*d*)**  $\delta$  = 7.92 (d, *J* = 8.9 Hz, 2H), 7.32–7.23 (m, 2H), 6.97–6.89 (m, 3H), 6.85 (d, *J* = 8.2 Hz, 1H), 3.96 (s, 2H), 3.86 (s, 3H), 3.74 (s, 3H) ppm.

**<sup>13</sup>C NMR (126 MHz, Chloroform-*d*)**  $\delta$  = 194.5 (t, *J* = 2.8 Hz), 163.6, 157.2 (d, *J* = 2.9 Hz), 154.5 (t, *J* = 288.3 Hz), 131.7, 130.5 (2C), 129.8, 129.4, 122.1 (dd, *J* = 4.8, 2.3 Hz), 120.7, 113.8 (2C), 110.9, 85.1 (dd, *J* = 23.5, 20.2 Hz), 55.6, 55.4, 37.6 (d, *J* = 2.0 Hz) ppm.

**<sup>19</sup>F NMR (376 MHz, Chloroform-*d*)**  $\delta$  = -89.27 (d, *J* = 38.1 Hz, 1F), -90.86 (d, *J* = 38.3 Hz, 1F) ppm.

**HRMS (ESI)** *m/z* calculated for C<sub>18</sub>H<sub>16</sub>F<sub>2</sub>O<sub>3</sub>Na [M+Na]<sup>+</sup>: 341.0960, found: 341.0963.

**3-(2,3-Dihydrobenzo[*b*][1,4]dioxin-6-yl)-4,4-difluoro-1-(4-methoxyphenyl)but-3-en-1-one (3ie)**

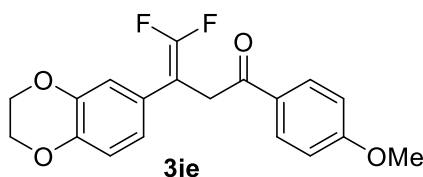

The title compound **3ie** was isolated through column chromatography (silica gel, petroleum ether/ethyl acetate 10:1) as a colorless oil (64.4 mg, 93%).

**<sup>1</sup>H NMR (500 MHz, Chloroform-*d*)**  $\delta$  = 7.95 (d, *J* = 8.5 Hz, 2H), 6.94 (d, *J* = 8.4 Hz, 2H), 6.84 (s, 1H), 6.80 (s, 2H), 4.22 (s, 4H), 3.96 (s, 2H), 3.87 (s, 3H) ppm.

**<sup>13</sup>C NMR (126 MHz, Chloroform-*d*)**  $\delta$  = 193.0 (t, *J* = 2.5 Hz), 162.8, 153.7 (dd, *J* =

291.7, 287.4 Hz), 142.4, 141.9, 129.6 (2C), 128.4, 125.7 (t,  $J = 3.9$  Hz), 120.2 (t,  $J = 3.6$  Hz), 116.3, 116.0 (t,  $J = 3.6$  Hz), 112.9 (2C), 85.9 (dd,  $J = 22.1, 17.0$  Hz), 63.45, 63.36, 54.6, 37.0 (d,  $J = 2.3$  Hz) ppm.

**$^{19}\text{F}$  NMR (471 MHz, Chloroform-*d*)**  $\delta = -88.93$  (d,  $J = 39.1$  Hz, 1F),  $-89.52$  (d,  $J = 39.3$  Hz, 1F) ppm.

**HRMS (ESI)**  $m/z$  calculated for  $\text{C}_{19}\text{H}_{16}\text{F}_2\text{O}_4\text{Na}$   $[\text{M}+\text{Na}]^+$ : 369.0909, found: 369.0915.

**4,4-Difluoro-1-(4-methoxyphenyl)-3-(4-(trifluoromethoxy)phenyl)but-3-en-1-one (3je)**

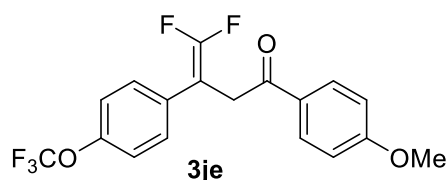

The title compound **3he** was isolated through column chromatography (silica gel, petroleum ether/ethyl acetate 10:1) as a colorless oil (50.6 mg, 68%).

**$^1\text{H}$  NMR (400 MHz, Chloroform-*d*)**  $\delta = 7.96$  (d,  $J = 8.9$  Hz, 2H), 7.34 (d,  $J = 1.1$  Hz, 2H), 7.17 (d,  $J = 8.1$  Hz, 2H), 6.95 (d,  $J = 8.9$  Hz, 2H), 4.01 (s, 2H), 3.88 (s, 3H) ppm.

**$^{13}\text{C}$  NMR (126 MHz, Chloroform-*d*)**  $\delta = 193.7$  (t,  $J = 2.8$  Hz), 164.0, 154.9 (dd,  $J = 292.5, 288.5$  Hz), 148.4, 132.4 (t,  $J = 4.1$  Hz), 130.6 (2C), 129.6 (t,  $J = 3.6$  Hz, 2C), 129.3, 121.1 (2C), 120.5 (q,  $J = 257.4$  Hz), 114.0 (2C), 86.7 (dd,  $J = 22.9, 17.0$  Hz), 55.6, 37.9 (d,  $J = 2.3$  Hz) ppm.

**$^{19}\text{F}$  NMR (376 MHz, Chloroform-*d*)**  $\delta = -57.84$  (s, 3F),  $-87.53$  (d,  $J = 35.6$  Hz),  $-88.51$  (d,  $J = 35.8$  Hz) ppm.

**HRMS (ESI)**  $m/z$  calculated for  $\text{C}_{18}\text{H}_{14}\text{F}_5\text{O}_3$   $[\text{M}+\text{H}]^+$ : 373.0858, found: 373.0873.

**4,4-Difluoro-1-(4-methoxyphenyl)-3-(3-(methylthio)phenyl)but-3-en-1-one (3ke)**

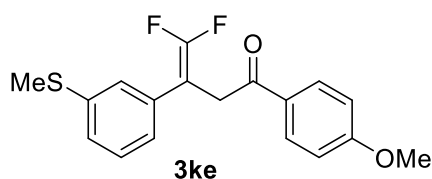

The title compound **3ke** was isolated through column chromatography (silica gel, petroleum ether/ethyl acetate 10:1) as a colorless oil (33.4 mg, 50%).

**<sup>1</sup>H NMR (400 MHz, Chloroform-*d*)**  $\delta$  = 7.98 (d, *J* = 8.9 Hz, 2H), 7.29 (s, 1H), 7.25–7.23(m, 1H), 7.16 (d, *J* = 7.9 Hz, 1H), 7.11 (d, *J* = 7.7 Hz, 1H), 6.97 (d, *J* = 8.8 Hz, 2H), 4.02 (s, 2H), 3.90 (s, 3H), 2.46 (s, 3H) ppm.

**<sup>13</sup>C NMR (101 MHz, Chloroform-*d*)**  $\delta$  = 193.7 (t, *J* = 2.5 Hz), 163.8, 154.8 (dd, *J* = 292.6, 288.3 Hz), 138.8, 134.3 (t, *J* = 4.1 Hz), 130.5 (2C), 129.3, 128.9, 126.1 (t, *J* = 3.6 Hz), 125.6, 124.8 (t, *J* = 3.4 Hz), 113.9 (2C), 87.2 (dd, *J* = 22.1, 17.2 Hz), 55.5, 37.9 (d, *J* = 2.3 Hz), 15.8 ppm.

**<sup>19</sup>F NMR (376 MHz, Chloroform-*d*)**  $\delta$  = -87.77 (d, *J* = 36.0 Hz, 1F), -88.48 (d, *J* = 36.2 Hz, 1F) ppm.

**HRMS (ESI)** *m/z* calculated for C<sub>18</sub>H<sub>16</sub>F<sub>2</sub>O<sub>2</sub><sup>32</sup>SNa [M+Na]<sup>+</sup>: 357.0731, found: 357.0730.

### 3-(4-Bromophenyl)-4,4-difluoro-1-(4-methoxyphenyl)but-3-en-1-one (**3le**)

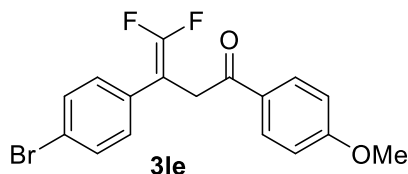

The title compound **3le** was isolated through column chromatography (silica gel, petroleum ether/ethyl acetate 10:1) as a colorless oil (70.3 mg, 96%).

**<sup>1</sup>H NMR (500 MHz, Chloroform-*d*)**  $\delta$  = 7.95 (d, *J* = 8.9 Hz, 2H), 7.44 (d, *J* = 8.5 Hz, 2H), 7.19 (d, *J* = 7.8 Hz, 2H), 6.95 (d, *J* = 8.9 Hz, 2H), 3.99 (s, 2H), 3.87 (s, 3H) ppm.

**<sup>13</sup>C NMR (126 MHz, Chloroform-*d*)**  $\delta$  = 193.7 (t, *J* = 2.8 Hz), 163.9, 154.6 (dd, *J* = 292.8, 288.6 Hz), 132.6 (t, *J* = 4.1 Hz), 131.7 (2C), 130.5 (2C), 129.7 (t, *J* = 3.5 Hz, 2C), 129.2, 121.4, 113.9 (2C), 86.8 (dd, *J* = 22.5, 17.0 Hz), 55.6, 37.7 (d, *J* = 2.3 Hz) ppm.

**<sup>19</sup>F NMR (471 MHz, Chloroform-*d*)**  $\delta$  = -87.44 (d, *J* = 35.5 Hz, 1F), -88.33 (d, *J* = 35.4 Hz, 1F) ppm.

**HRMS (ESI)**  $m/z$  calculated for  $C_{17}H_{13}^{79}BrF_2O_2Na$   $[M+Na]^+$ : 388.9969, found: 388.9962.

**3-(4-Chlorophenyl)-4,4-difluoro-1-(4-methoxyphenyl)but-3-en-1-one (3me)**

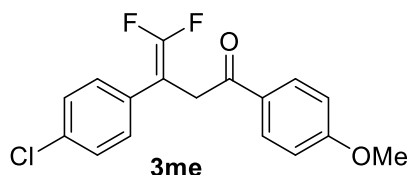

The title compound **3me** was isolated through column chromatography (silica gel, petroleum ether/ethyl acetate 10:1) as a colorless oil (61.8 mg, 96%).

**$^1H$  NMR (400 MHz, Chloroform-*d*)**  $\delta$  = 7.93 (d,  $J$  = 8.9 Hz, 2H), 7.31–7.20 (m, 4H), 6.93 (d,  $J$  = 8.9 Hz, 2H), 3.98 (s, 2H), 3.86 (s, 3H) ppm.

**$^{13}C$  NMR (126 MHz, Chloroform-*d*)**  $\delta$  = 193.8 (t,  $J$  = 2.8 Hz), 164.0, 154.8 (dd,  $J$  = 292.7, 288.5 Hz), 133.3, 132.2 (t,  $J$  = 4.1 Hz), 130.6 (2C), 129.5 (t,  $J$  = 3.6 Hz, 2C), 129.3, 128.8 (2C), 114.0 (2C), 86.9 (dd,  $J$  = 22.6, 17.0 Hz), 55.6, 37.9 (d,  $J$  = 2.3 Hz) ppm.

**$^{19}F$  NMR (376 MHz, Chloroform-*d*)**  $\delta$  = -87.59 (d,  $J$  = 36.1 Hz, 1F), -88.48 (d,  $J$  = 35.5 Hz, 1F) ppm.

**HRMS (ESI)**  $m/z$  calculated for  $C_{17}H_{13}ClF_2O_2Na$   $[M+Na]^+$ : 345.0464, found: 345.0461.

**4,4-Difluoro-3-(4-fluorophenyl)-1-(4-methoxyphenyl)but-3-en-1-one (3ne)**

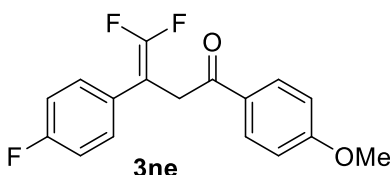

The title compound **3ne** was isolated through column chromatography (silica gel, petroleum ether/ethyl acetate 10:1) as a colorless oil (56.9 mg, 93%).

**$^1H$  NMR (500 MHz, Chloroform-*d*)**  $\delta$  = 7.95 (d,  $J$  = 9.0 Hz, 2H), 7.29 (dd,  $J$  = 8.0,



5.5 Hz, 2H), 7.01 (t,  $J = 8.7$  Hz, 2H), 6.95 (d,  $J = 8.9$  Hz, 2H), 3.99 (s, 2H), 3.87 (s, 3H) ppm.

**$^{13}\text{C}$  NMR (126 MHz, Chloroform-*d*)**  $\delta = 193.9$  (t,  $J = 2.8$  Hz), 163.9, 162.0 (d,  $J = 247.1$  Hz), 154.8 (dd,  $J = 292.6, 289.5$  Hz), 130.6 (2C), 129.9 (dt,  $J = 7.4, 3.5$  Hz, 2C), 129.6 (q,  $J = 3.6$  Hz), 129.3, 115.6 (d,  $J = 21.6$  Hz, 2C), 114.0 (2C), 86.8 (dd,  $J = 22.5, 17.5$  Hz), 55.6, 38.1 (d,  $J = 2.3$  Hz) ppm.

**$^{19}\text{F}$  NMR (471 MHz, Chloroform-*d*)**  $\delta = -88.58$  (d,  $J = 38.0$  Hz, 1F),  $-89.46$  (d,  $J = 38.0$  Hz, 1F),  $-114.41$  (s, 1F) ppm.

**HRMS (ESI)**  $m/z$  calculated for  $\text{C}_{17}\text{H}_{13}\text{F}_3\text{O}_2\text{Na}$   $[\text{M}+\text{Na}]^+$ : 329.0760, found: 329.0771.

### 3-(3-Chlorophenyl)-4,4-difluoro-1-(4-methoxyphenyl)but-3-en-1-one (3oe)

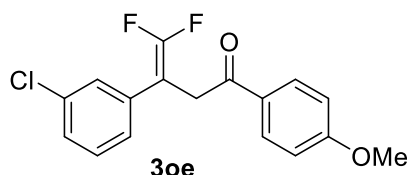

The title compound **3oe** was isolated through column chromatography (silica gel, petroleum ether/ethyl acetate 10:1) as a colorless oil (52.7 mg, 81%).

**$^1\text{H}$  NMR (500 MHz, Chloroform-*d*)**  $\delta = 7.90$  (d,  $J = 8.7$  Hz, 2H), 7.23–7.12 (m, 4H), 6.89 (d,  $J = 8.8$  Hz, 2H), 3.94 (s, 2H), 3.82 (s, 3H) ppm.

**$^{13}\text{C}$  NMR (126 MHz, Chloroform-*d*)**  $\delta = 193.5$  (t,  $J = 2.7$  Hz), 163.9, 154.9 (dd,  $J = 293.3, 288.8$  Hz), 135.5 (t,  $J = 4.2$  Hz), 134.3, 130.5 (2C), 129.7, 129.1, 128.1 (t,  $J = 3.7$  Hz), 127.6, 126.2 (t,  $J = 3.6$  Hz), 113.9 (2C), 86.7 (dd,  $J = 22.8, 16.8$  Hz), 55.6, 37.7 (d,  $J = 2.3$  Hz) ppm.

**$^{19}\text{F}$  NMR (471 MHz, Chloroform-*d*)**  $\delta = -87.00$  (d,  $J = 34.5$  Hz, 1F),  $-87.86$  (d,  $J = 34.7$  Hz, 1F) ppm.

**HRMS (ESI)**  $m/z$  calculated for  $\text{C}_{17}\text{H}_{13}^{35}\text{ClF}_2\text{O}_2\text{Na}$   $[\text{M}+\text{Na}]^+$ : 345.0464, found: 345.0486.

**Methyl 4-(1,1-difluoro-4-(4-methoxyphenyl)-4-oxobut-1-en-2-yl)benzoate (3pe)**

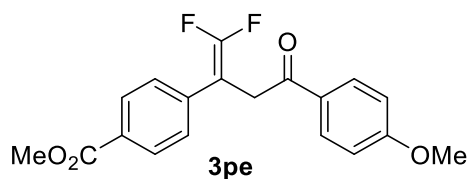

The title compound **3pe** was isolated through column chromatography (silica gel, petroleum ether/ethyl acetate 10:1) as a colorless oil (51.0 mg, 74%).

**<sup>1</sup>H NMR (500 MHz, Chloroform-*d*)**  $\delta$  = 8.01–7.93 (m, 4H), 7.39 (d,  $J$  = 7.6 Hz, 2H), 6.95 (d,  $J$  = 8.9 Hz, 2H), 4.04 (s, 2H), 3.89 (s, 3H), 3.87 (s, 3H) ppm.

**<sup>13</sup>C NMR (126 MHz, Chloroform-*d*)**  $\delta$  = 193.6 (t,  $J$  = 2.7 Hz), 166.8, 164.0, 155.1 (dd,  $J$  = 294.6, 289.4 Hz), 138.5 (t,  $J$  = 4.4 Hz), 130.6 (2C), 129.8 (2C), 129.2, 129.0, 128.0 (t,  $J$  = 3.7 Hz, 2C), 114.0 (2C), 87.3 (dd,  $J$  = 22.5, 16.4 Hz), 55.7, 52.3, 37.6 (d,  $J$  = 2.3 Hz) ppm.

**<sup>19</sup>F NMR (471 MHz, Chloroform-*d*)**  $\delta$  = -85.91 (d,  $J$  = 32.1 Hz, 1F), -86.96 (d,  $J$  = 32.1 Hz, 1F) ppm.

**HRMS (ESI)**  $m/z$  calculated for C<sub>19</sub>H<sub>17</sub>F<sub>2</sub>O<sub>4</sub> [M+H]<sup>+</sup>: 347.1089, found: 347.1080.

**3-(3-Acetylphenyl)-4,4-difluoro-1-(4-methoxyphenyl)but-3-en-1-one (3qe)**

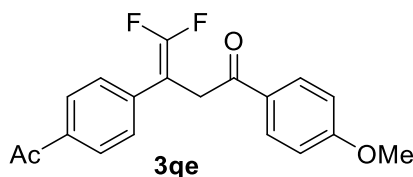

The title compound **3qe** was isolated through column chromatography (silica gel, petroleum ether/ethyl acetate 10:1) as a colorless oil (37.7 mg, 57%).

**<sup>1</sup>H NMR (500 MHz, Chloroform-*d*)**  $\delta$  = 7.96 (d,  $J$  = 9.0 Hz, 2H), 7.91 (d,  $J$  = 8.3 Hz, 2H), 7.42 (d,  $J$  = 7.2 Hz, 2H), 6.95 (d,  $J$  = 8.9 Hz, 2H), 4.06 (s, 3H), 3.88 (s, 2H), 2.57 (s, 3H) ppm.

**<sup>13</sup>C NMR (126 MHz, Chloroform-*d*)**  $\delta$  = 197.6, 193.6 (t,  $J$  = 2.8 Hz), 164.0, 155.1 (dd,  $J$  = 294.7, 289.4 Hz), 138.7 (t,  $J$  = 4.4 Hz), 135.9, 130.6 (2C), 129.2, 128.6 (2C), 128.2

(t,  $J = 3.5$  Hz, 2C), 114.1 (2C), 87.3 (dd,  $J = 22.5, 16.1$  Hz), 55.7, 37.6 (d,  $J = 2.3$  Hz), 26.7 ppm.

$^{19}\text{F}$  NMR (471 MHz, Chloroform-*d*)  $\delta = -85.73$  (d,  $J = 31.8$  Hz, 1F),  $-86.77$  (d,  $J = 32.0$  Hz, 1F) ppm.

HRMS (ESI)  $m/z$  calculated for  $\text{C}_{19}\text{H}_{17}\text{F}_2\text{O}_3$   $[\text{M}+\text{H}]^+$ : 331.1140, found: 331.1150.

#### 4,4-Difluoro-1-(4-methoxyphenyl)-3-(naphthalen-2-yl)but-3-en-1-one (3re)

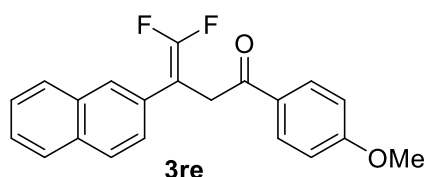

The title compound **3re** was isolated through column chromatography (silica gel, petroleum ether/ethyl acetate 10:1) as a colorless oil (54.8 mg, 84%).

$^1\text{H}$  NMR (500 MHz, Chloroform-*d*)  $\delta = 7.98$  (d,  $J = 8.8$  Hz, 2H), 7.85–7.69 (m, 4H), 7.55–7.37 (m, 3H), 6.95 (d,  $J = 8.8$  Hz, 2H), 4.12 (s, 2H), 3.87 (s, 3H) ppm.

$^{13}\text{C}$  NMR (126 MHz, Chloroform-*d*)  $\delta = 193.9$  (t,  $J = 2.7$  Hz), 163.8, 154.9 (dd,  $J = 292.6, 288.3$  Hz), 133.2, 132.5, 131.1 (t,  $J = 4.0$  Hz), 130.5 (2C), 129.4, 128.2, 128.0, 127.6, 127.1 (t,  $J = 3.6$  Hz), 126.3, 126.2, 125.9 (t,  $J = 3.5$  Hz), 113.9 (2C), 87.6 (dd,  $J = 22.1, 17.0$  Hz), 55.5, 38.1 (d,  $J = 2.4$  Hz) ppm.

$^{19}\text{F}$  NMR (471 MHz, Chloroform-*d*)  $\delta = -87.73$  (d,  $J = 36.5$  Hz, 1F),  $-88.93$  (d,  $J = 36.6$  Hz, 1F) ppm.

HRMS (ESI)  $m/z$  calculated for  $\text{C}_{21}\text{H}_{17}\text{F}_2\text{O}_2$   $[\text{M}+\text{H}]^+$ : 339.1191, found: 339.1200.

#### 3-(Benzo[b]thiophen-2-yl)-4,4-difluoro-1-(4-methoxyphenyl)but-3-en-1-one (3se)

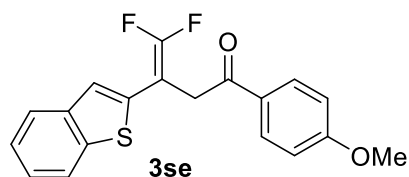

The title compound **3se** was isolated through column chromatography (silica gel, petroleum ether/ethyl acetate 10:1) as a colorless oil (53.7 mg, 78%).

**<sup>1</sup>H NMR (400 MHz, Chloroform-*d*)**  $\delta$  = 7.91 (d, *J* = 8.9 Hz, 2H), 7.85 (d, *J* = 7.7 Hz, 1H), 7.77 (d, *J* = 7.9 Hz, 1H), 7.45–7.34 (m, 3H), 6.91 (d, *J* = 8.9 Hz, 2H), 4.02 (s, 2H), 3.85 (s, 3H) ppm.

**<sup>13</sup>C NMR (101 MHz, Chloroform-*d*)**  $\delta$  = 192.8 (t, *J* = 2.9 Hz), 162.8, 153.9 (t, *J* = 290.5 Hz), 138.9, 136.7, 129.5 (2C), 128.4, 127.9 (dd, *J* = 4.8, 2.1 Hz), 125.3 (dd, *J* = 4.2, 1.6 Hz), 123.6, 123.5, 121.9, 121.6 (d, *J* = 2.1 Hz), 112.9 (2C), 80.8 (dd, *J* = 24.6, 21.0 Hz), 54.6, 37.7 (d, *J* = 2.4 Hz) ppm.

**<sup>19</sup>F NMR (376 MHz, Chloroform-*d*)**  $\delta$  = -84.99 (d, *J* = 33.4 Hz, 1F), -88.39 (d, *J* = 33.8 Hz, 1F).

**HRMS (ESI)** *m/z* calculated for C<sub>19</sub>H<sub>15</sub>F<sub>2</sub>O<sub>2</sub>S [M+H]<sup>+</sup>: 345.0755, found: 345.0765.

#### 4,4-Difluoro-1-(4-methoxyphenyl)-3-(6-methoxypyridin-3-yl)but-3-en-1-one (3te)

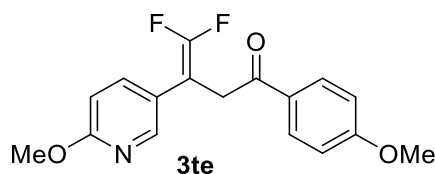

The title compound **3se** was isolated through column chromatography (silica gel, petroleum ether/ethyl acetate 10:1) as a colorless oil (60.4 mg, 95%).

**<sup>1</sup>H NMR (400 MHz, Chloroform-*d*)**  $\delta$  = 8.09 (s, 1H), 7.93 (d, *J* = 8.9 Hz, 2H), 7.56 (dd, *J* = 8.7, 1.6 Hz, 1H), 6.93 (d, *J* = 8.9 Hz, 2H), 6.71 (d, *J* = 8.7 Hz, 1H), 3.97 (s, 3H), 3.89 (s, 3H), 3.86 (s, 3H) ppm.

**<sup>13</sup>C NMR (126 MHz, Chloroform-*d*)**  $\delta$  = 193.8 (t, *J* = 2.8 Hz), 164.0, 163.3, 154.8 (dd, *J* = 291.5, 288.4 Hz), 146.1, 138.6 (t, *J* = 3.5 Hz), 130.6 (2C), 129.3, 122.7, 114.0 (2C), 110.8, 84.7 (dd, *J* = 23.4, 17.9 Hz), 55.6, 53.6, 37.7 (d, *J* = 2.3 Hz) ppm.

**<sup>19</sup>F NMR (376 MHz, Chloroform-*d*)**  $\delta$  = -88.18 (d, *J* = 37.6 Hz, 1F), -88.96 (d, *J* = 37.6 Hz, 1F) ppm.

**HRMS (ESI)** *m/z* calculated for C<sub>17</sub>H<sub>16</sub>F<sub>2</sub>NO<sub>3</sub> [M+H]<sup>+</sup>: 320.1093, found: 320.1097.

**4,4-Difluoro-1-(4-methoxyphenyl)-3-(quinolin-3-yl)but-3-en-1-one (3ue)**

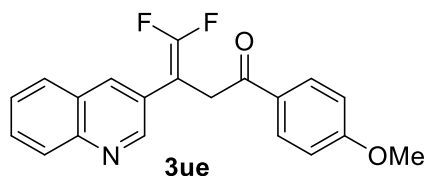

The title compound **3ue** was isolated through column chromatography (silica gel, petroleum ether/ethyl acetate 10:1) as a colorless oil (60.4 mg, 89%).

**<sup>1</sup>H NMR (500 MHz, Chloroform-*d*)**  $\delta$  = 8.90 (s, 1H), 8.09–8.04 (m, 2H), 7.96 (d,  $J$  = 8.8 Hz, 2H), 7.76 (d,  $J$  = 8.2 Hz, 1H), 7.68 (m, 1H), 7.51 (t,  $J$  = 7.5 Hz, 1H), 6.94 (d,  $J$  = 8.8 Hz, 2H), 4.13 (s, 2H), 3.86 (s, 3H) ppm.

**<sup>13</sup>C NMR (126 MHz, Chloroform-*d*)**  $\delta$  = 193.5 (t,  $J$  = 2.7 Hz), 164.0, 155.2 (dd,  $J$  = 293.3, 290.0 Hz), 150.0 (dd,  $J$  = 5.0, 2.7 Hz), 147.1, 134.9 (t,  $J$  = 3.5 Hz), 130.5 (2C), 129.7, 129.2, 129.1, 127.9, 127.6, 127.0, 126.9 (d,  $J$  = 4.3 Hz), 114.0 (2C), 85.2 (dd,  $J$  = 23.4, 17.5 Hz), 55.6, 37.7 (d,  $J$  = 2.3 Hz) ppm.

**<sup>19</sup>F NMR (471 MHz, Chloroform-*d*)**  $\delta$  = -86.25 (d,  $J$  = 33.5 Hz, 1F), -87.51 (d,  $J$  = 33.8 Hz, 1F) ppm.

**HRMS (ESI)**  $m/z$  calculated for C<sub>20</sub>H<sub>16</sub>F<sub>2</sub>NO<sub>2</sub> [M+H]<sup>+</sup>: 340.1144 found: 340.1148.

**(8*R*,9*S*,13*S*,14*S*)-3-(1,1-Difluoro-4-(4-methoxyphenyl)-4-oxobut-1-en-2-yl)-13-methyl-6,7,8,9,11,12,13,14,15,16-decahydro-17*H*-cyclopenta[*a*]phenanthren-17-one (3ve)**

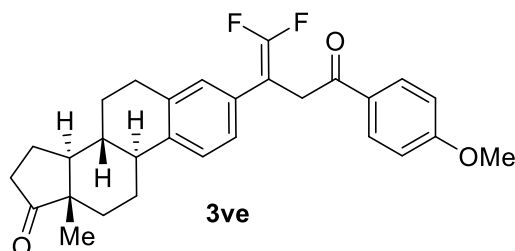

The title compound **3ve** was isolated through column chromatography (silica gel, petroleum ether/ethyl acetate 5:1) as a colorless oil (85.4 mg, 92%).

**<sup>1</sup>H NMR (500 MHz, Chloroform-*d*)**  $\delta$  = 7.96 (d,  $J$  = 8.9 Hz, 2H), 7.24 (d,  $J$  = 8.2 Hz,

1H), 7.10 (d,  $J = 8.3$  Hz, 1H), 7.07 (s, 1H), 6.95 (d,  $J = 8.9$  Hz, 2H), 4.00 (s, 2H), 3.87 (s, 3H), 2.88 (dd,  $J = 9.1, 4.2$  Hz, 2H), 2.50 (dd,  $J = 19.0, 8.7$  Hz, 1H), 2.41–2.24 (m, 2H), 2.18–2.09 (m, 1H), 2.06–1.92 (m, 2H), 1.70–1.37 (m, 7H), 0.89 (s, 3H) ppm.

$^{13}\text{C}$  NMR (101 MHz, Chloroform-*d*)  $\delta = 221.0, 194.0$  (t,  $J = 2.8$  Hz), 163.8, 154.7 (dd,  $J = 291.9, 287.7$  Hz), 139.1, 136.7, 131.1 (t,  $J = 3.9$  Hz), 130.5 (2C), 129.4, 128.6 (t,  $J = 3.4$  Hz), 125.6, 125.4 (t,  $J = 3.4$  Hz), 113.9 (2C), 87.2 (dd,  $J = 21.6, 17.2$  Hz), 55.6, 50.5, 48.0, 44.4, 38.1, 37.9 (d,  $J = 2.4$  Hz), 35.9, 31.6, 29.5, 26.5, 25.6, 21.6, 13.9 ppm.

$^{19}\text{F}$  NMR (471 MHz, Chloroform-*d*)  $\delta = -88.56$  (d,  $J = 38.1$  Hz, 1F),  $-89.43$  (d,  $J = 38.2$  Hz, 1F) ppm.

HRMS (ESI)  $m/z$  calculated for  $\text{C}_{29}\text{H}_{31}\text{F}_2\text{O}_3$   $[\text{M}+\text{H}]^+$ : 465.2236, found: 465.2239.

### Synthesis of the *gem*-Difluoroalkene **3ae** on 2 mmol Scale of **1a**

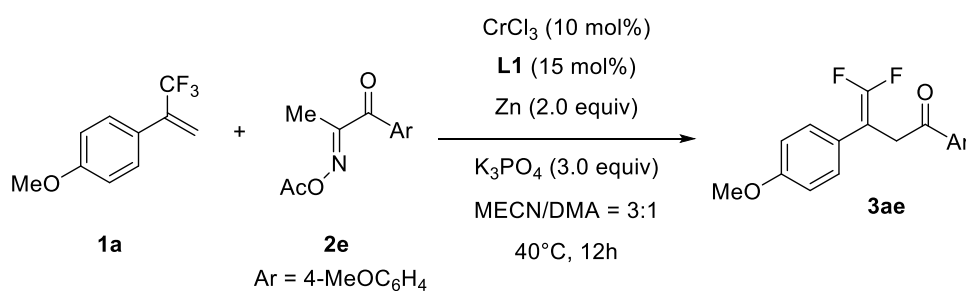

$\text{CrCl}_3$  (32 mg, 0.2 mmol, 10 mol%), 2,2':6',2''-terpyridine (**L1**) (70 mg, 0.3 mmol, 15 mol %), Zn (260 mg, 4 mmol, 2.0 equiv),  $\text{K}_3\text{PO}_4$  (1.27 g, 6 mmol, 3.0 equiv), and the oxime ester **2e** (940 mg, 4 mmol, 2.0 equiv) were placed in a Schlenk tube equipped with a stir bar. Next, the Schlenk tube was evacuated and filled with nitrogen (three cycles). To this mixture,  $\text{CH}_3\text{CN}/\text{DMA}$  (3:1) (10 mL) was added under nitrogen atmosphere. After stirring at 40 °C for 15 minutes, the trifluoromethyl-substituted alkene **1a** (404 mg, 2 mmol, 1.0 equiv) was added under a positive flow of nitrogen. The reaction mixture was stirred at 40 °C for 12 hours before it was quenched by addition of water. The aqueous phase was extracted with ethyl acetate (3×50 mL). The combined organic phases were washed with brine, dried over  $\text{Na}_2\text{SO}_4$ , filtered, and concentrated in vacuo. The crude materials were purified through column chromatography on silica gel (petroleum ether/ethyl acetate 10:1) to give 4,4-difluoro-1,3-bis(4-methoxyphenyl)but-3-en-1-one **3ae** (553 mg, 87%) as the product.

## Control Experiments.

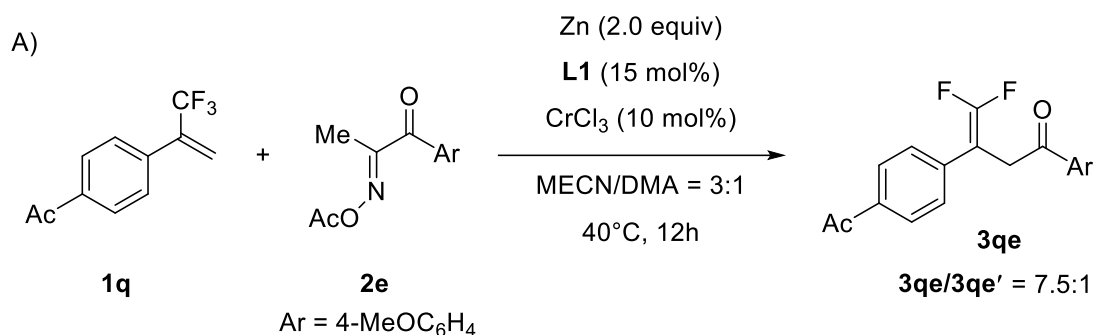

CrCl<sub>3</sub> (3.2 mg, 0.02 mmol, 10 mol%), 2,2':6',2''-terpyridine (**L1**) (7.0 mg, 0.03 mmol, 15 mol %), Zn (26.0 mg, 0.4 mmol, 2.0 equiv), and the oxime ester **2e** (94.0 mg, 0.4 mmol, 2.0 equiv) were placed in a Schlenk tube equipped with a stir bar. Next, the Schlenk tube was evacuated and filled with nitrogen (three cycles). To this mixture, CH<sub>3</sub>CN/DMA (3:1) (1.0 mL) was added under nitrogen atmosphere. After stirring at 40 °C for 15 minutes, the trifluoromethyl-substituted alkene **1q** (42.8 mg, 0.2 mmol, 1.0 equiv) was added under a positive flow of nitrogen. The reaction mixture was stirred at 40 °C for 12 hours before it was quenched by addition of water. The aqueous phase was extracted with ethyl acetate (3×20 mL). The combined organic phases were washed with brine, dried over Na<sub>2</sub>SO<sub>4</sub>, filtered, and concentrated in vacuo. The crude materials were purified through column chromatography on silica gel (petroleum ether/ethyl acetate = 10:1) to give the mixture of **3qe** and **3qe'** (25.1 mg, combined yield 43%, **3qe:3qe'** = 7.5:1) as the products.

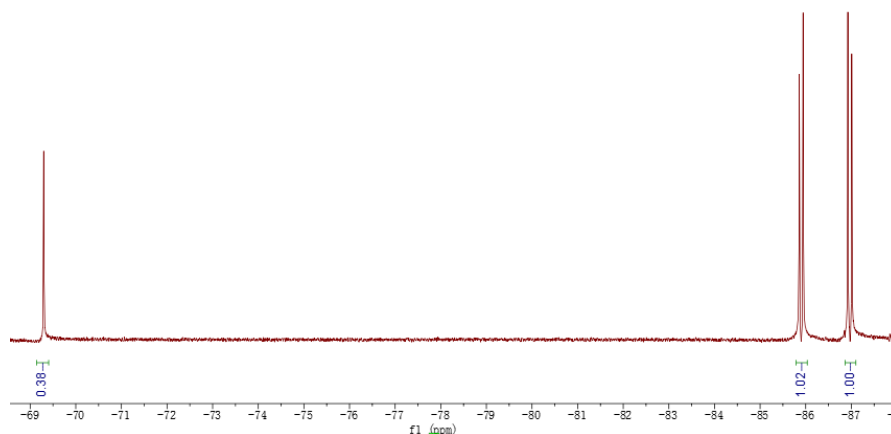

B)

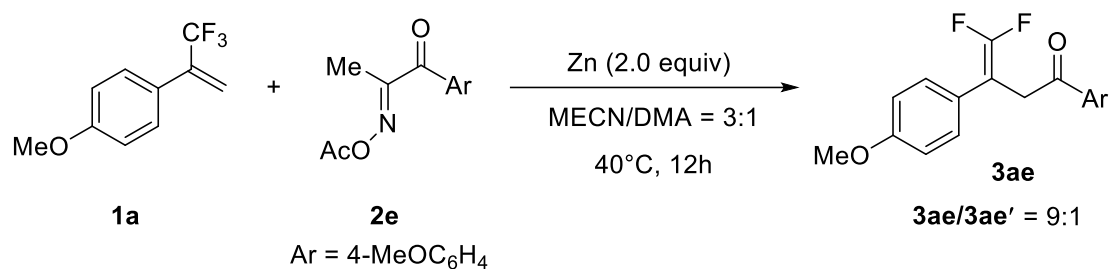

Zn (26.0 mg, 0.4 mmol, 2.0 equiv) and the oxime ester **2e** (94.0 mg, 0.4 mmol, 2.0 equiv) were placed in a Schlenk tube equipped with a stir bar. Next, the Schlenk tube was evacuated and filled with nitrogen (three cycles). To this mixture, CH<sub>3</sub>CN/DMA (3:1) (1.0 mL) was added under nitrogen atmosphere. After stirring at 40 °C for 15 minutes, the trifluoromethyl-substituted alkenes **1a** (40.4 mg, 0.2 mmol, 1.0 equiv) was added under a positive flow of nitrogen. The reaction mixture was stirred at 40 °C for 12 hours before it was quenched by addition of water. The aqueous phase was extracted with ethyl acetate (3×20 mL). The combined organic phases were washed with brine, dried over Na<sub>2</sub>SO<sub>4</sub>, filtered, and concentrated in vacuo. The crude materials were purified through column chromatography on silica gel (petroleum ether/ethyl acetate = 10:1) to give the mixture of **3ae** and **3ae'** (6.4 mg, combined yield: 10%, **3ae** : **3ae'** = 9:1) as the products.

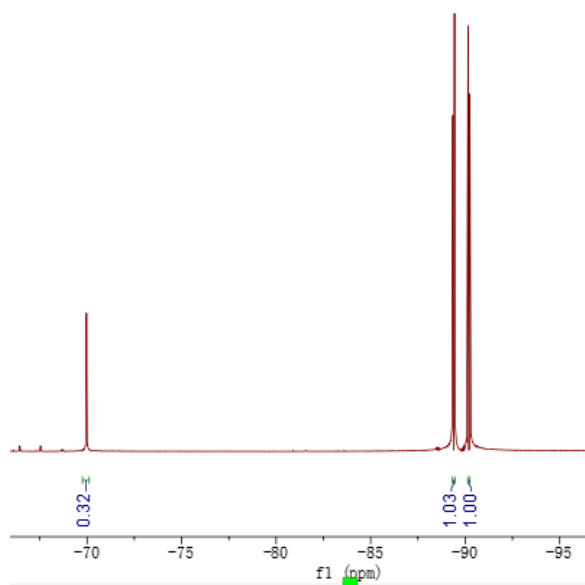



C1)

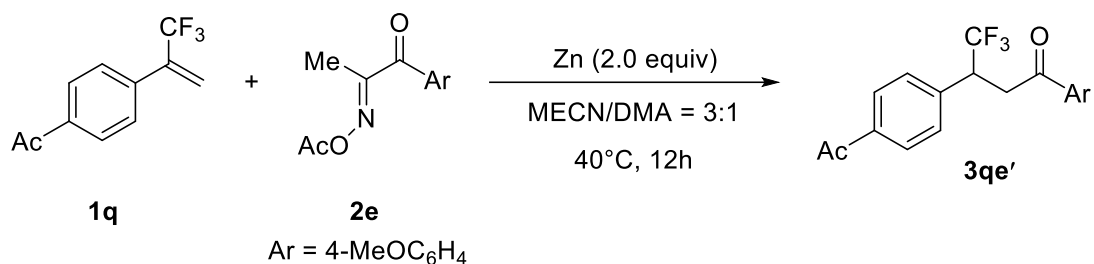

Zn (26.0 mg, 0.4 mmol, 2.0 equiv) and the oxime ester **2e** (94.0 mg, 0.4 mmol, 2.0 equiv) were placed in a Schlenk tube equipped with a stir bar. Next, the Schlenk tube was evacuated and filled with nitrogen (three cycles). To this mixture, CH<sub>3</sub>CN/DMA (3:1) (1.0 mL) was added under nitrogen atmosphere. After stirring at 40 °C for 15 minutes, the trifluoromethyl-substituted alkene **1q** (42.8 mg, 0.2 mmol, 1.0 equiv) was added under a positive flow of nitrogen. The reaction mixture was stirred at 40 °C for 12 hours before it was quenched by addition of water. The aqueous phase was extracted with ethyl acetate (3×20 mL). The combined organic phases were washed with brine, dried over Na<sub>2</sub>SO<sub>4</sub>, filtered, and concentrated in vacuo. The crude materials were purified through column chromatography on silica gel (petroleum ether/ethyl acetate = 10:1) to give 3-(4-acetylphenyl)-1-argio-4,4,4-trifluorobutan-1-one (**3qe'**) (8.4 mg, 12%) as a colorless oil.

**<sup>1</sup>H NMR (500 MHz, Chloroform-*d*)** δ = 7.95–7.88 (m, 4H), 7.50 (d, *J* = 8.1 Hz, 2H), 6.92 (d, *J* = 8.9 Hz, 2H), 4.62–4.07 (m, 1H), 3.86 (s, 3H), 3.73–3.53 (m, 2H), 2.57 (s, 3H) ppm.

**<sup>13</sup>C NMR (126 MHz, Chloroform-*d*)** δ = 197.7, 193.5, 164.1, 140.0, 137.0, 130.5 (2C), 129.5 (2C), 129.2, 128.8 (2C), 126.8 (q, *J* = 279.4 Hz), 114.1 (2C), 55.7, 45.0 (q, *J* = 27.6 Hz), 37.7, 26.7 ppm.

**<sup>19</sup>F NMR (471 MHz, Chloroform-*d*)** δ = –69.3 (s, 3F) ppm.

**HRMS (ESI)** *m/z* calculated for C<sub>19</sub>H<sub>18</sub>F<sub>3</sub>O<sub>3</sub> [M+H]<sup>+</sup>: 351.1203, found: 351.1208.

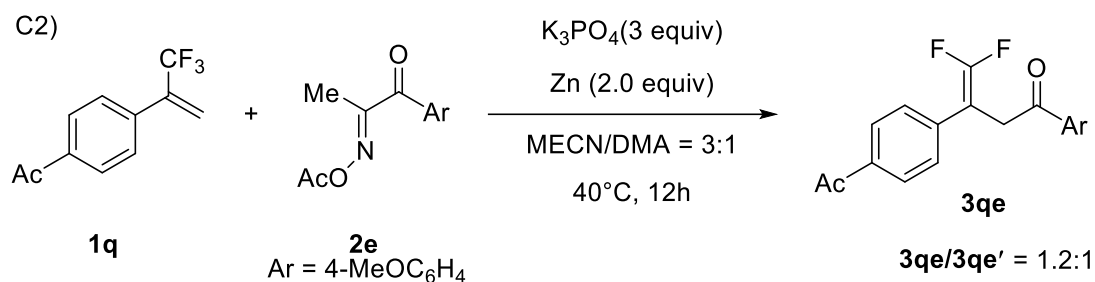

Zn (26.0 mg, 0.4 mmol, 2.0 equiv) and the oxime ester **2e** (94.0 mg, 0.4 mmol, 2.0 equiv) were placed in a Schlenk tube equipped with a stir bar. Next, the Schlenk tube was evacuated and filled with nitrogen (three cycles). To this mixture, CH<sub>3</sub>CN/DMA (3:1) (1.0 mL) was added under nitrogen atmosphere. After stirring at 40 °C for 15 minutes, the trifluoromethyl-substituted alkene **1q** (42.8 mg, 0.2 mmol, 1.0 equiv) was added under a positive flow of nitrogen. The reaction mixture was stirred at 40 °C for 12 hours before it was quenched by addition of water. The aqueous phase was extracted with ethyl acetate (3×20 mL). The combined organic phases were washed with brine, dried over Na<sub>2</sub>SO<sub>4</sub>, filtered, and concentrated in vacuo. The crude materials were purified through column chromatography on silica gel (petroleum ether/ethyl acetate = 10:1) to give the mixture of **3qe** and **3qe'** (18.5 mg, combined yield : 28%, **3qe** : **3qe'** = 1.2:1) as the products.

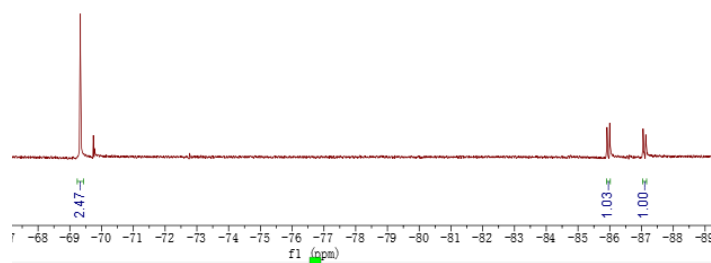

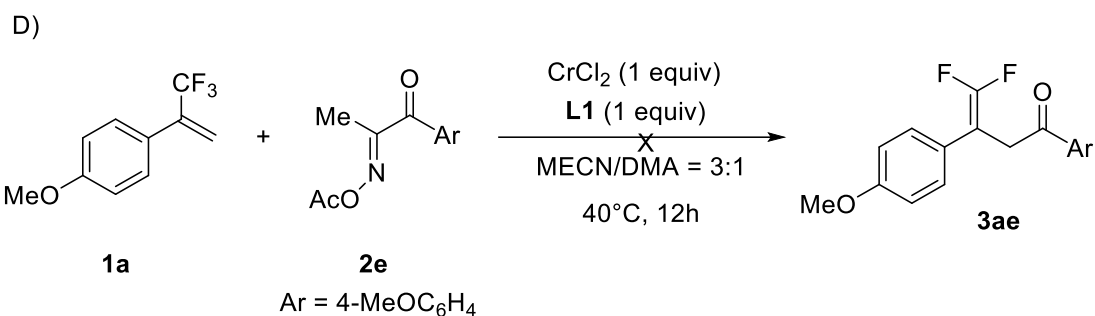

CrCl<sub>2</sub> (24.6 mg, 0.2 mmol, 1.0 equiv), 2,2':6',2''-terpyridine (**L1**) (46.6 mg, 0.2 mmol, 1.0 equiv), and the oxime ester **2e** (94.0 mg, 0.4 mmol, 2.0 equiv) were placed in a Schlenk tube equipped with a stir bar. Next, the Schlenk tube was evacuated and filled with nitrogen (three cycles). To this mixture, CH<sub>3</sub>CN/DMA (3:1) (1.0 mL) was added under nitrogen atmosphere. After stirring at 40 °C for 15 minutes, the trifluoromethyl-substituted alkene **1a** (40.4 mg, 0.2 mmol, 1.0 equiv) was added under a positive flow of nitrogen. The reaction mixture was stirred at 40 °C for 12 hours before it was quenched by addition of water. The aqueous phase was extracted with ethyl acetate (3×20 mL). The combined organic phases were washed with brine, dried over Na<sub>2</sub>SO<sub>4</sub>, filtered, and concentrated in vacuo. According to the analyses based on TLC and <sup>1</sup>H-NMR spectroscopy, the product **3ae** was not observed, and neither **1a** nor **2e** was converted.

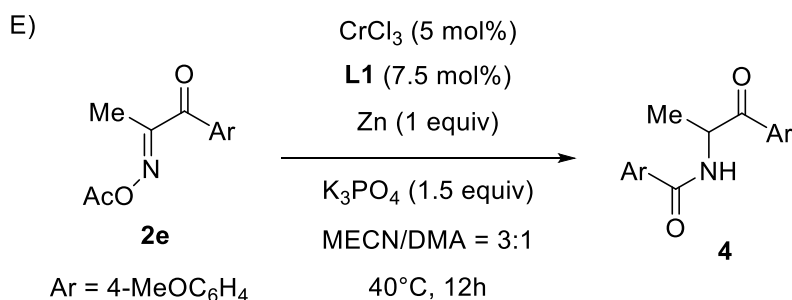

CrCl<sub>3</sub> (3.2 mg, 0.02 mmol, 5 mol%), 2,2':6',2''-terpyridine (**L1**) (7.0 mg, 0.03 mmol, 7.5 mol %), Zn (26.0 mg, 0.4 mmol, 1.0 equiv), K<sub>3</sub>PO<sub>4</sub> (127.0 mg, 0.6 mmol, 1.5 equiv), and the oxime ester **2e** (94.0 mg, 0.4 mmol, 1.0 equiv) were placed in a Schlenk tube equipped with a stir bar. Next, the Schlenk tube was evacuated and filled with nitrogen (three cycles). To this mixture, CH<sub>3</sub>CN/DMA (3:1) (1.0 mL) was added under nitrogen atmosphere. The reaction mixture was stirred at 40 °C for 12 hours before it was

quenched by addition of water. The aqueous phase was extracted with ethyl acetate (3×20 mL). The combined organic phases were washed with brine, dried over Na<sub>2</sub>SO<sub>4</sub>, filtered, and concentrated in vacuo. The residue was purified through column chromatography (petroleum ether/ethyl acetate = 3:1) on silica gel, to give *4-methoxy-N-(1-(4-methoxyphenyl)-1-oxopropan-2-yl)benzamide* (**4**) (34.4 mg, 55%) as a yellow oil.

**<sup>1</sup>H NMR (500 MHz, Chloroform-*d*)** δ = 8.04 (d, *J* = 8.8 Hz, 2H), 7.83 (d, *J* = 8.4 Hz, 2H), 6.99 (d, *J* = 8.6 Hz, 2H), 6.94 (d, *J* = 8.5 Hz, 2H), 5.71 (quint, *J* = 7.1 Hz, 1H), 3.90 (s, 3H), 3.86 (s, 3H), 1.53 (d, *J* = 7.0 Hz, 3H) ppm.

**<sup>13</sup>C NMR (126 MHz, Chloroform-*d*)** δ = 197.9, 166.3, 164.4, 162.4, 131.4 (2C), 129.0 (2C), 126.8, 126.6, 114.3 (2C), 113.9 (2C), 55.7, 55.6, 50.2, 20.5 ppm.

**HRMS (ESI)** *m/z* calculated for C<sub>18</sub>H<sub>20</sub>NO<sub>4</sub> [M+H]<sup>+</sup>: 314.1387, found: 314.1392.

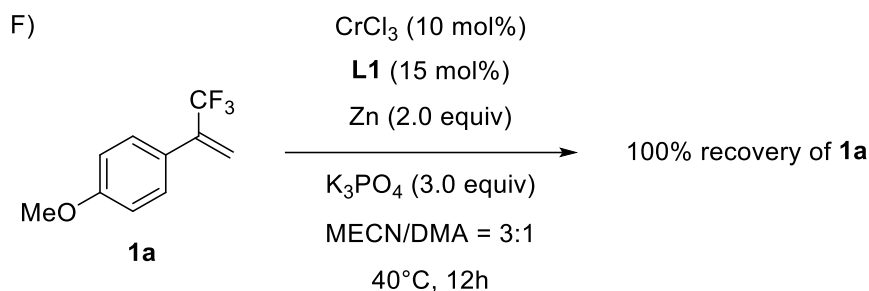

CrCl<sub>3</sub> (3.2 mg, 0.02 mmol, 10 mol%), 2,2':6',2''-terpyridine (**L1**) (7.0 mg, 0.03 mmol, 15 mol %), Zn (26.0 mg, 0.4 mmol, 2.0 equiv), and K<sub>3</sub>PO<sub>4</sub> (127.0 mg, 0.6 mmol, 3.0 equiv) were placed in a Schlenk tube equipped with a stir bar. Next, the Schlenk tube was evacuated and filled with nitrogen (three cycles). To this mixture, CH<sub>3</sub>CN/DMA (3:1) (1.0 mL) was added under nitrogen atmosphere. After stirring at 40 °C for 15 minutes, the trifluoromethyl-substituted alkene **1a** (40.4 mg, 0.2 mmol, 1.0 equiv) was added under a positive flow of nitrogen. The reaction mixture was stirred at 40 °C for 12 hours before it was quenched by addition of water. The aqueous phase was extracted with ethyl acetate (3×20 mL). The combined organic phases were washed with brine, dried over Na<sub>2</sub>SO<sub>4</sub>, filtered, and concentrated in vacuo. According to the analyses based on TLC and <sup>1</sup>H-NMR spectroscopy, conversion of **1a** was not observed.

## Kinetic Studies

### A) Kinetic Progress Analysis for the Reaction between **1q** and **2e**

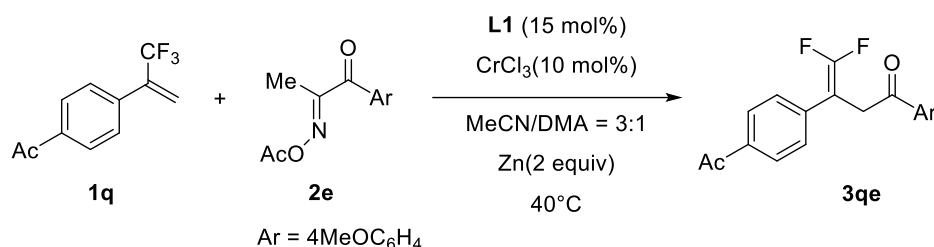

A Schlenk tube was charged with the acyl oxime esters **2e** (94 mg, 0.4 mmol, 2 equiv), the trifluoromethyl styrene **1q** (42.8 mg, 0.2 mmol, 1 equiv), **CrCl<sub>3</sub>** (3.2 mg, 0.02 mol, 10 mol%), the ligand 2,2':6',2''-terpyridine (**L1**) (7.0 mg, 0.03 mol, 15 mol%), and **Zn** (26 mg, 0.4 mmol, 2 equiv) in **MeCN/DMA** (3:1). After stirring for 1h, 2h, 3h, 6h, 12h at 40 °C, the reaction was quenched by addition of water. The aqueous phase was extracted with ethyl acetate (3×20 mL). The combined organic phases were washed with brine, dried over **Na<sub>2</sub>SO<sub>4</sub>**, filtered, and concentrated in vacuo. The crude materials were purified through column chromatography on silica gel (petroleum ether/ethyl acetate = 10:1) to provide the recovered acyl oxime ester **2e** and the *gem*-difluoroalkenes **3qe** as the products.

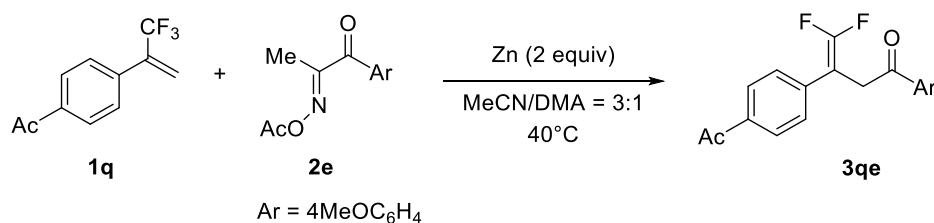

A Schlenk tube was charged with the acyl oxime esters **2e** (94 mg, 0.4 mmol, 2 equiv), the trifluoromethyl styrene **1q** (42.8 mg, 0.2 mmol, 1 equiv), and **Zn** (26 mg, 0.4 mmol, 2 equiv) in **MeCN/DMA** (3:1). After stirring for 1h, 3h, 6h, 12h at 40 °C, the reaction was quenched by addition of water. The aqueous phase was extracted with ethyl acetate (3×20 mL). The combined organic phases were washed with brine, dried over **Na<sub>2</sub>SO<sub>4</sub>**, filtered, and concentrated in vacuo. The crude materials were purified through column

chromatography on silica gel (petroleum ether/ethyl acetate) to provide the recovered acyl oxime ester **2e** and the *gem*-difluoroalkenes **3qe** as the products.

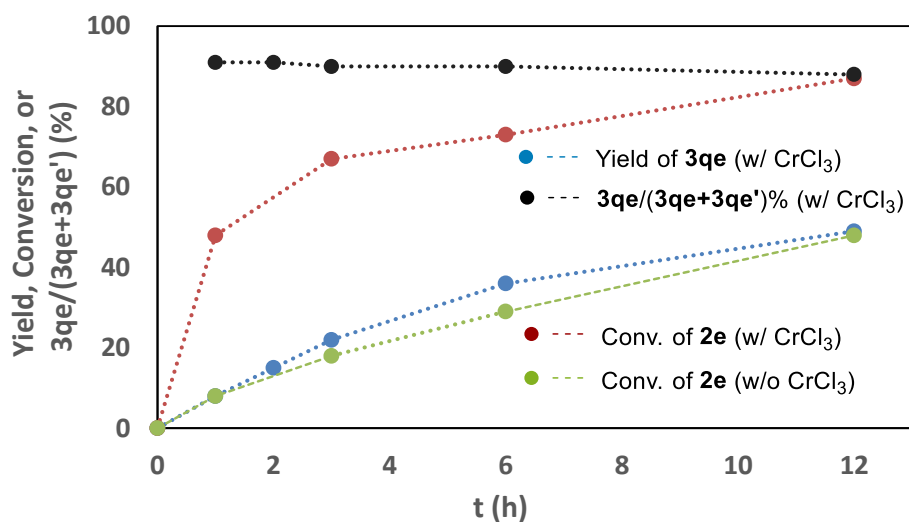

| T (h) | Conv. of <b>2e</b><br>(w/ CrCl <sub>3</sub> ) | Conv. of <b>2e</b><br>(w/o CrCl <sub>3</sub> ) | Yield of <b>2e</b><br>(w/ CrCl <sub>3</sub> ) | <b>3qe</b> /( <b>3qe</b> + <b>3qe'</b> )<br>(w/CrCl <sub>3</sub> ) |
|-------|-----------------------------------------------|------------------------------------------------|-----------------------------------------------|--------------------------------------------------------------------|
| 1     | 48%                                           | 8%                                             | 8%                                            | 91%                                                                |
| 2     | n.d.                                          | n.d.                                           | 15%                                           | 91%                                                                |
| 3     | 67%                                           | 18%                                            | 22%                                           | 90%                                                                |
| 6     | 73%                                           | 29%                                            | 36%                                           | 90%                                                                |
| 12    | 87%                                           | 48%                                            | 49%                                           | 88%                                                                |

### Determination of the Reaction Order of the Reactants and Catalyst

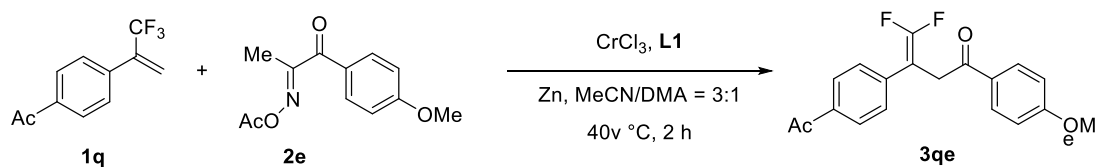

A Schlenk tube was charged with the indicated concentration of the acyl oxime ester **2e**, the trifluoromethyl styrene **1q**, CrCl<sub>3</sub>, the ligand 2,2':6',2''-terpyridine (**L1**), and Zn in MeCN/DMA (3:1). After stirring for 2h at 40 °C, the reaction was quenched by

addition of water. The aqueous phase was extracted with ethyl acetate (3×20 mL). The combined organic phases were washed with brine, dried over Na<sub>2</sub>SO<sub>4</sub>, filtered, and concentrated in vacuo. The crude materials were purified through column chromatography on silica gel (petroleum ether/ethyl acetate) to give the *gem*-difluoroalkenes **3qe** as the product. The initial rates were calculated and plotted against the reactant or catalyst concentration to determine the reaction orders.

### B) Determination of the Reaction Order in the $\alpha$ -Trifluoromethyl Styrene **1q**

The reaction was performed with acyl oxime esters **2e** (94.0 mg, 0.4 mmol, 1.0 equiv, 0.4 M), CrCl<sub>3</sub> (3.2 mg, 0.02 mmol, 5 mol %), the ligand 2,2':6',2''-terpyridine (**L1**) (7.0 mg, 0.03 mmol, 7.5 mol %), and Zn (26.0 mg, 0.4 mmol, 1.0 equiv) in MeCN/DMA (3:1) (1.0 mL) in the presence of 0.2 M, 0.3 M, 0.4M and 0.5 M the  $\alpha$ -trifluoromethyl styrene **1q** with the reaction time of 2 h. The initial rates at various **1q** were similar, showing the reaction exhibits zero-order rate dependence on the concentration of **1q**.

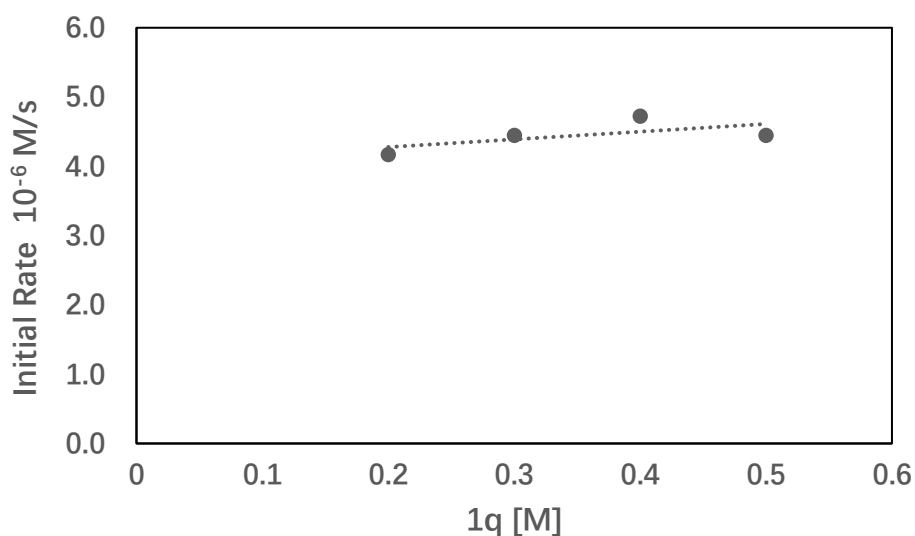

| [ <b>1a</b> ] (M) | Yield (%) | [ <b>3qe</b> ] (10 <sup>-2</sup> M) | Initial Rate (10 <sup>-6</sup> M/s) |
|-------------------|-----------|-------------------------------------|-------------------------------------|
| 0.2               | 15        | 3.00                                | 4.17                                |
| 0.3               | 11        | 3.20                                | 4.44                                |
| 0.4               | 8.5       | 3.40                                | 4.72                                |
| 0.5               | 6.4       | 3.20                                | 4.44                                |

### C) Determination of the Reaction Order in the Acyl Oxime Esters **2e**

The reaction was performed with the  $\alpha$ -trifluoromethyl styrene **1q** (42.8 mg, 0.2 mmol, 1.0 equiv, 0.2 M), CrCl<sub>3</sub> (3.2 mg, 0.02 mmol, 10 mol%), the ligand 2,2':6',2''-terpyridine (**L1**) (7.0 mg, 0.03 mmol, 15 mol%), and Zn (26.0 mg, 0.4 mmol, 2.0 equiv) in MeCN/DMA (3:1) (1.0 mL) in the presence of 0.2 M, 0.4 M, 0.6 M, and 0.8 M the acyl oxime ester **2e** with the reaction time of 2 h. The initial rates at various **2e** were similar, showing the reaction exhibits zero-order rate dependence on the concentration of **2e**.

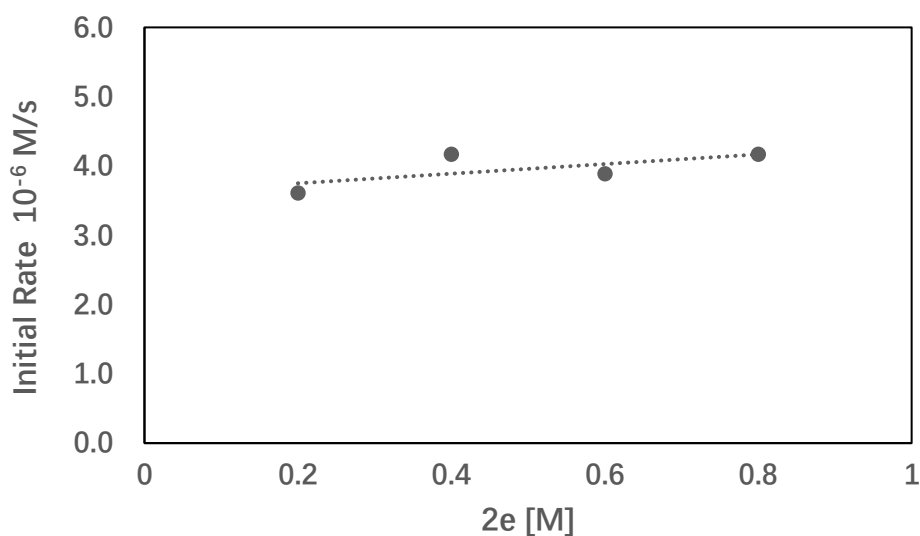

| [ <b>2e</b> ] (M) | Yield (%) | [ <b>3qe</b> ] (10 <sup>-2</sup> M) | Initial Rate (10 <sup>-6</sup> M/s) |
|-------------------|-----------|-------------------------------------|-------------------------------------|
| 0.2               | 13        | 2.60                                | 3.61                                |
| 0.4               | 15        | 3.00                                | 4.17                                |
| 0.6               | 14        | 2.80                                | 3.89                                |
| 0.8               | 15        | 3.00                                | 4.17                                |

### D) Determination of the Reaction Order in the Cr Catalyst

The reaction was performed with  $\alpha$ -trifluoromethyl styrene **1q** (42.8 mg, 0.2 mmol, 2.0 equiv, 0.2 M), the oxime ester **2e** (94.0 mg, 0.4 mmol, 2.0 equiv, 0.4 M), and Zn (26.0 mg, 0.4 mmol, 2.0 equiv) in MeCN/DMA (3:1) (1.0 mL) in the presence of 0.01 M, 0.015 M, 0.02 M, and 0.025 M CrCl<sub>3</sub> with 0.015 M, 0.0225 M, 0.30 M, and 0.375 M **L1**, respectively, with the reaction time of 2 h. The relationship between the initial rates



and  $[\text{CrCl}_3]$  was linear, showing the reaction exhibits a first-order rate dependence on the concentration of  $\text{CrCl}_3$ .

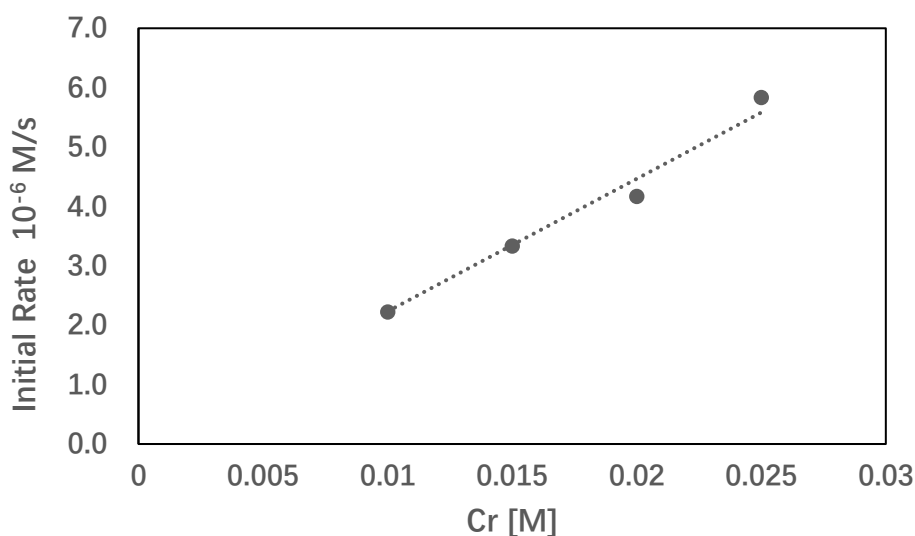

| $[\text{CrCl}_3]$ (M) | Yield (%) | $[\mathbf{3qe}]$ ( $10^{-2}\text{M}$ ) | Initial Rate ( $10^{-6}\text{M/s}$ ) |
|-----------------------|-----------|----------------------------------------|--------------------------------------|
| 0.010                 | 8         | 1.60                                   | 2.22                                 |
| 0.015                 | 12        | 2.40                                   | 3.33                                 |
| 0.020                 | 15        | 3.00                                   | 4.17                                 |
| 0.025                 | 21        | 4.20                                   | 5.83                                 |

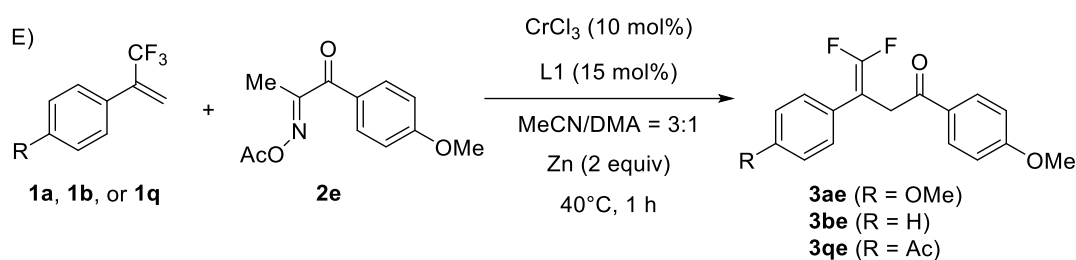

A Schlenk tube was charged with the acyl oxime ester **2e** (188 mg, 0.8 mmol, 2 equiv), the indicated trifluoromethyl styrene **1a**, **1b**, or **1q** (0.4 mmol, 1 equiv),  $\text{CrCl}_3$  (6.4 mg, 0.04 mol, 10mol% ), the ligand 2,2':6',2''-terpyridine (**L1**)(14.0 mg, 0.06 mol, 15mol%), and Zn (52 mg, 0.8 mmol, 2 equiv) in MeCN/DMA (3:1) (2.0 mL). After stirring for 1 h at 40 °C, the reaction was quenched by addition of water. The aqueous phase was extracted with ethyl acetate (3×20 mL). The combined organic phases were washed

with brine, dried over Na<sub>2</sub>SO<sub>4</sub>, filtered, and concentrated in vacuo. The crude materials were purified through column chromatography on silica gel (petroleum ether/ethyl acetate = 10:1) to give the *gem*-difluoroalkenes **3ae**, **1be**, or **3qe** as the products.

| R   | Yield (%) | [ <b>3</b> ] (10 <sup>-2</sup> M) | Initial Rate (10 <sup>-6</sup> M/s) |
|-----|-----------|-----------------------------------|-------------------------------------|
| OMe | 14        | 2.80                              | 7.80                                |
| H   | 11        | 2.20                              | 6.11                                |
| Ac  | 8         | 1.60                              | 4.44                                |

## References

1. Liu, Y.; Zhou, Y.; Zhao, Y.; Qu, J. Synthesis of *gem*-Difluoroallylboronates via FeCl<sub>2</sub>-Catalyzed Boration/ $\beta$ -Fluorine Elimination of Trifluoromethyl Alkenes. *Org. Lett.* **2017**, *19*, 946–949.
2. Lan, Y.; Yang, F.; Wang, C. Synthesis of *gem*-Difluoroalkenes via Nickel-Catalyzed Allylic Defluorinative Reductive Cross-Coupling. *ACS Catal.* **2018**, *8*, 9245–9251.
3. Cheng, Y.-Y.; Lei, T.; Su, L.; Fan, X.; Chen, B.; Tung, C.-H.; Wu, L.-Z. Visible Light Irradiation of Acyl Oxime Esters and Styrenes Efficiently Constructs  $\beta$ -Carbonyl Imides by a Scission and Four-Component Reassembly Process. *Org. Lett.* **2019**, *21*, 8789–8794
4. Fan, X.; Lei, T.; Chen, B.; Tung, C.-H.; Wu, L.-Z. Photocatalytic C–C Bond Activation of Oxime Ester for Acyl Radical Generation and Application. *Org. Lett.* **2019**, *21*, 4153–4158.

# $^1\text{H}$ -, $^{13}\text{C}$ -, and $^{19}\text{F}$ -NMR Spectra

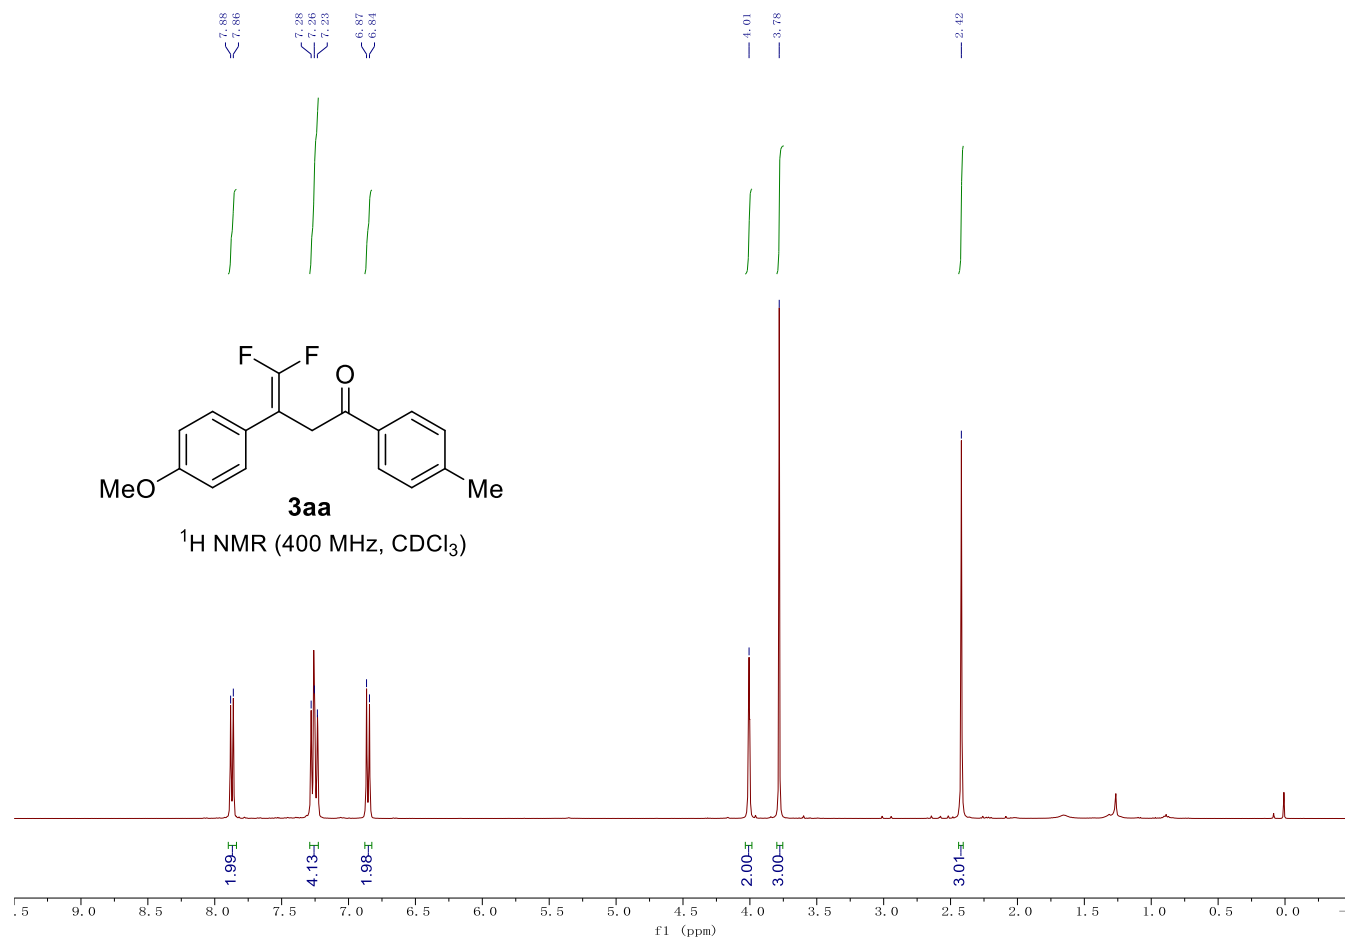

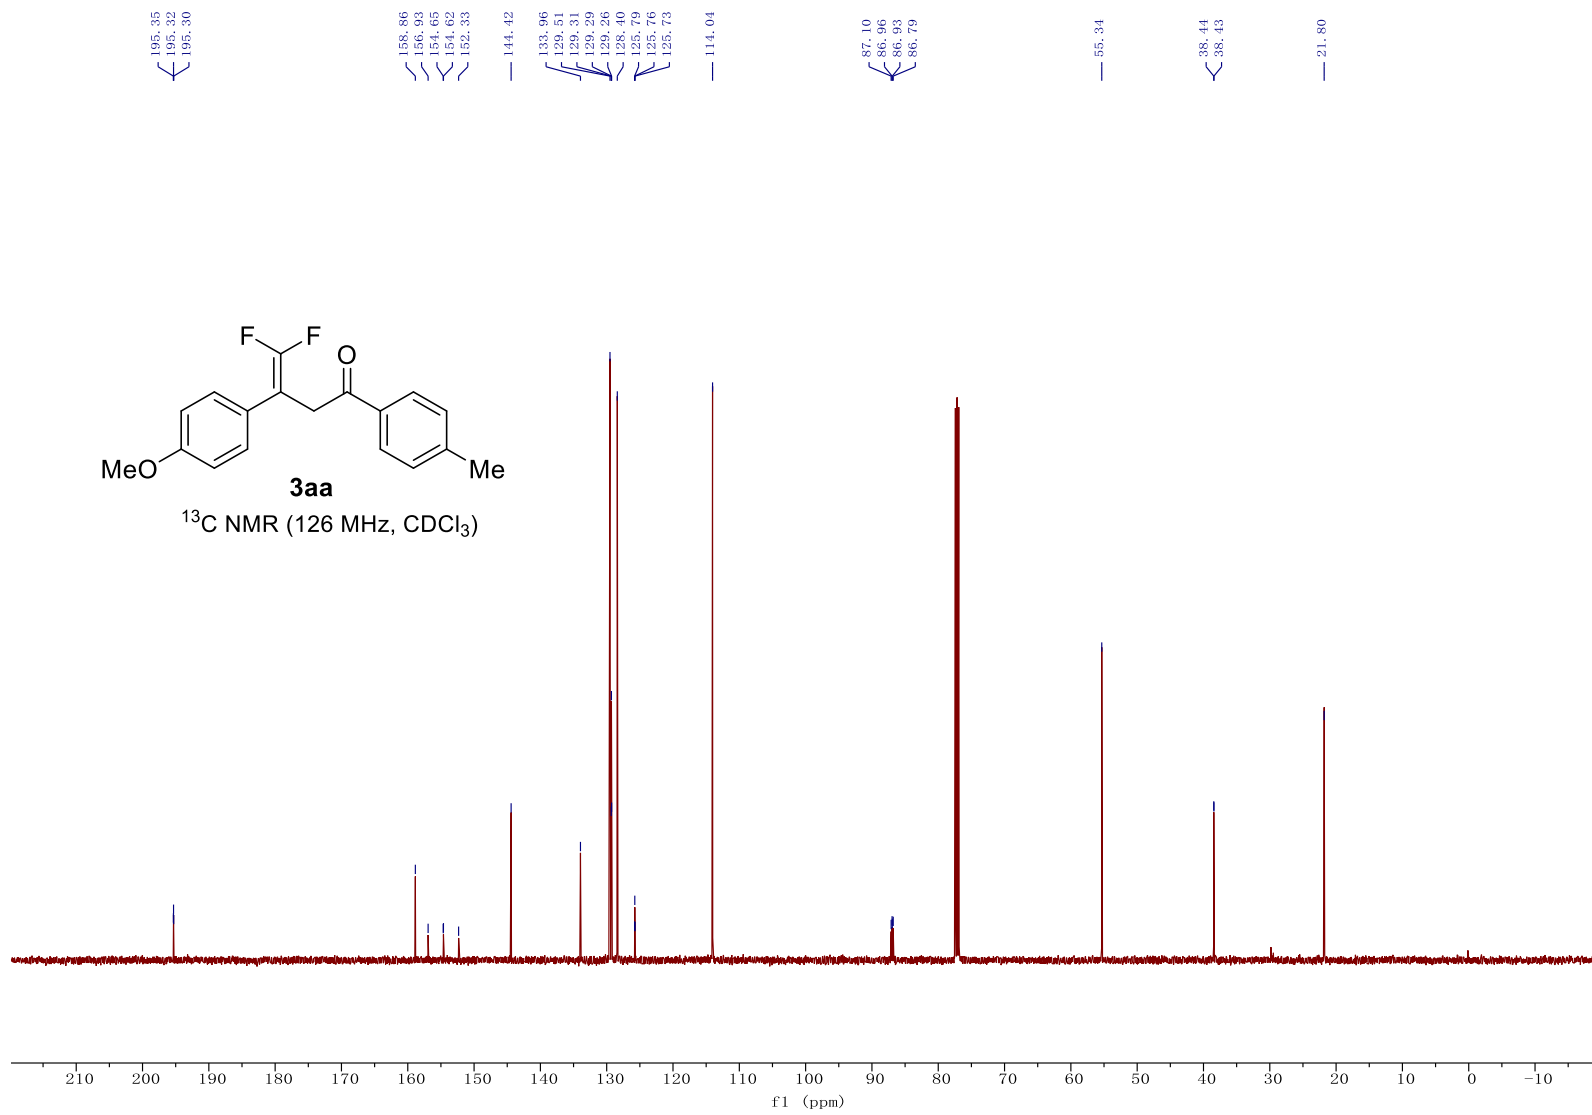

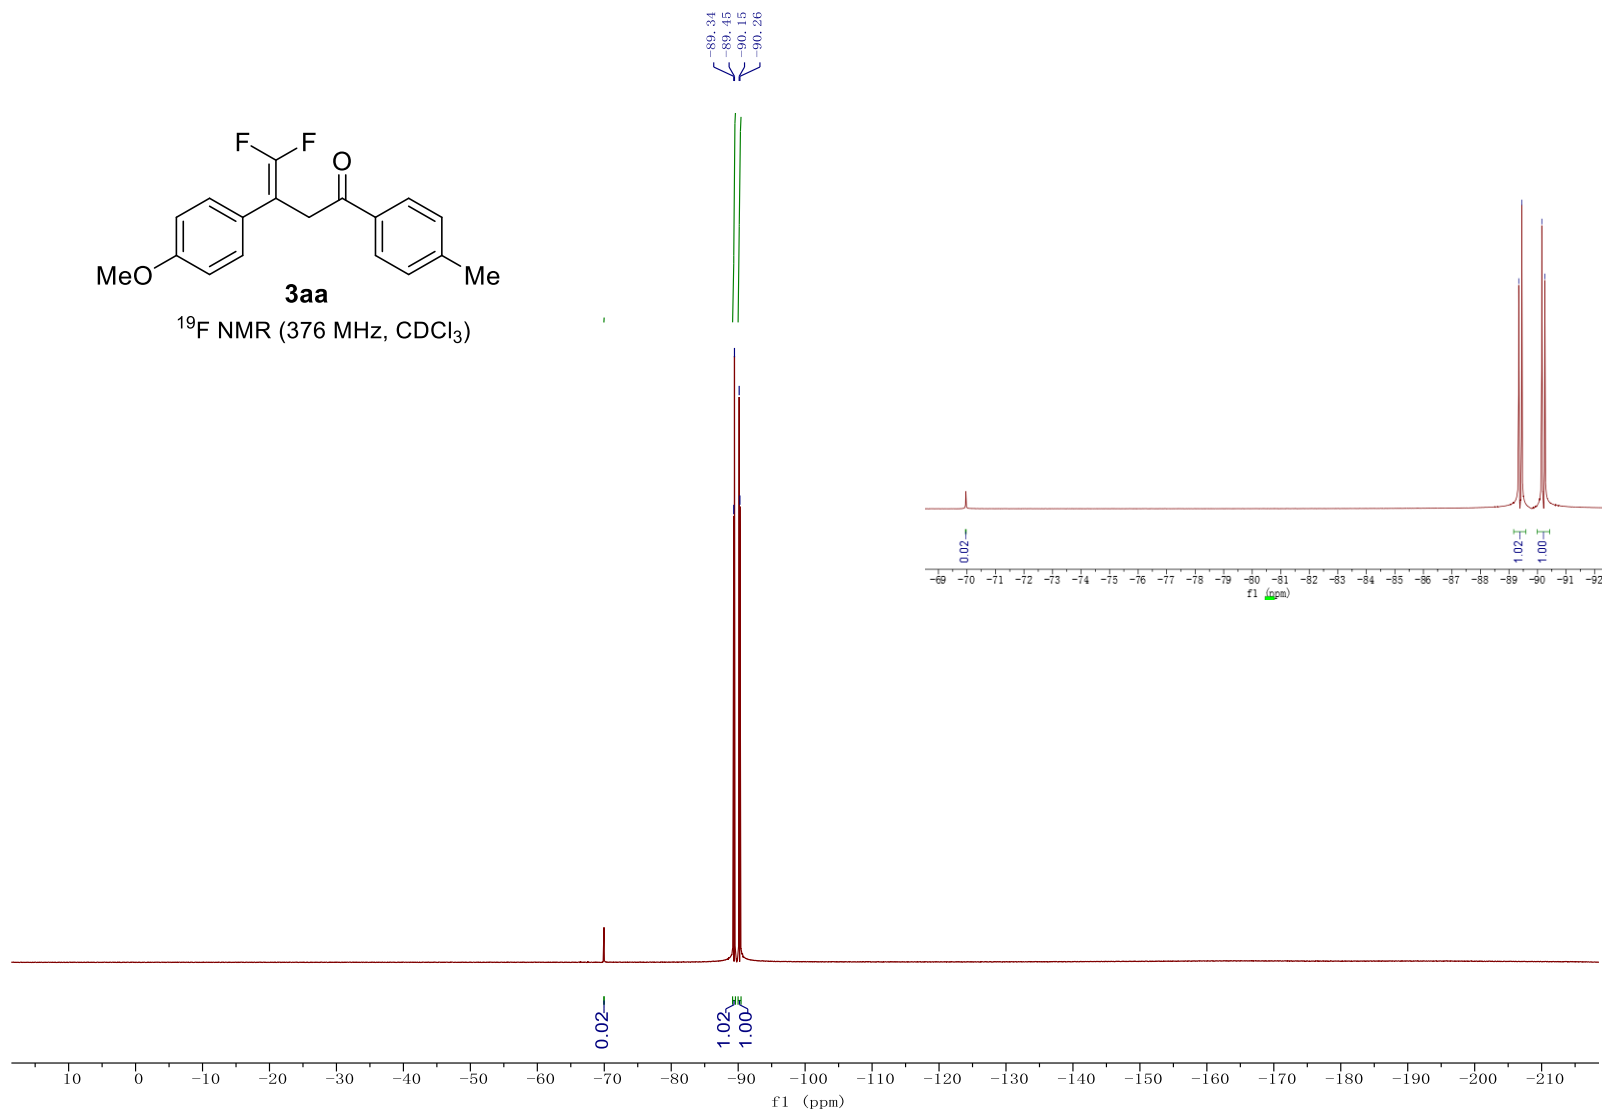

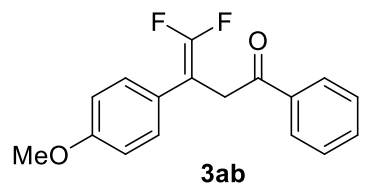

<sup>1</sup>H NMR (400 MHz, CDCl<sub>3</sub>)

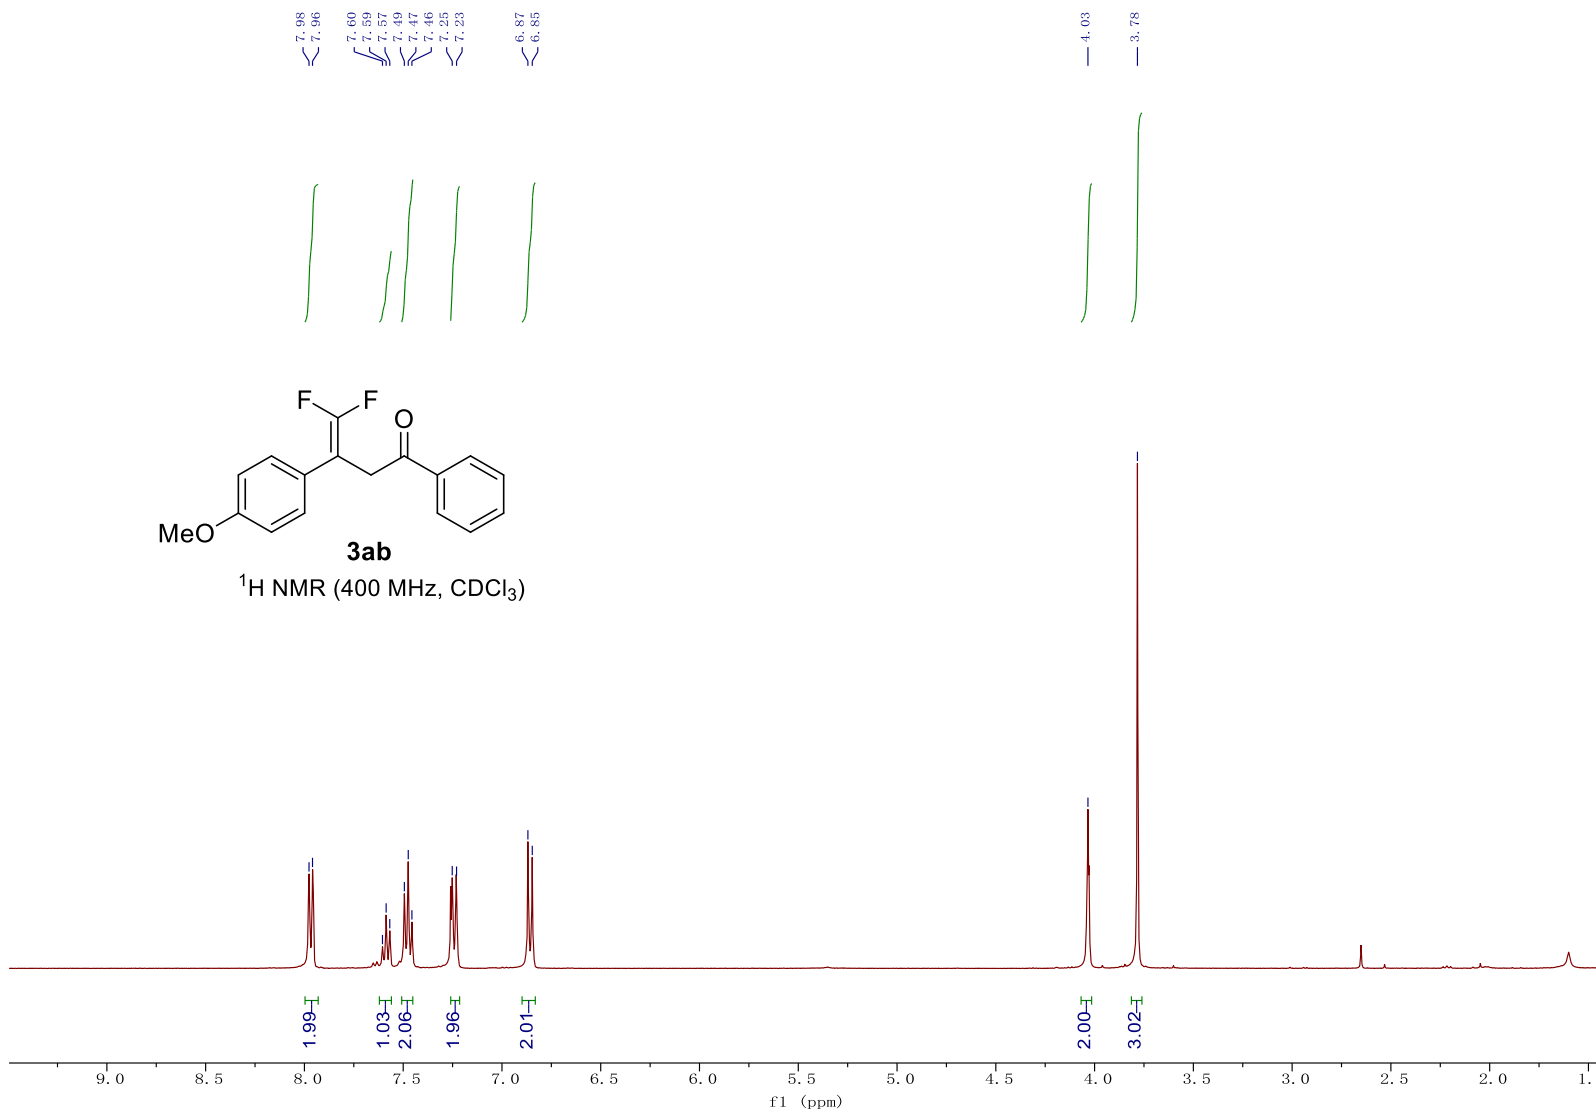

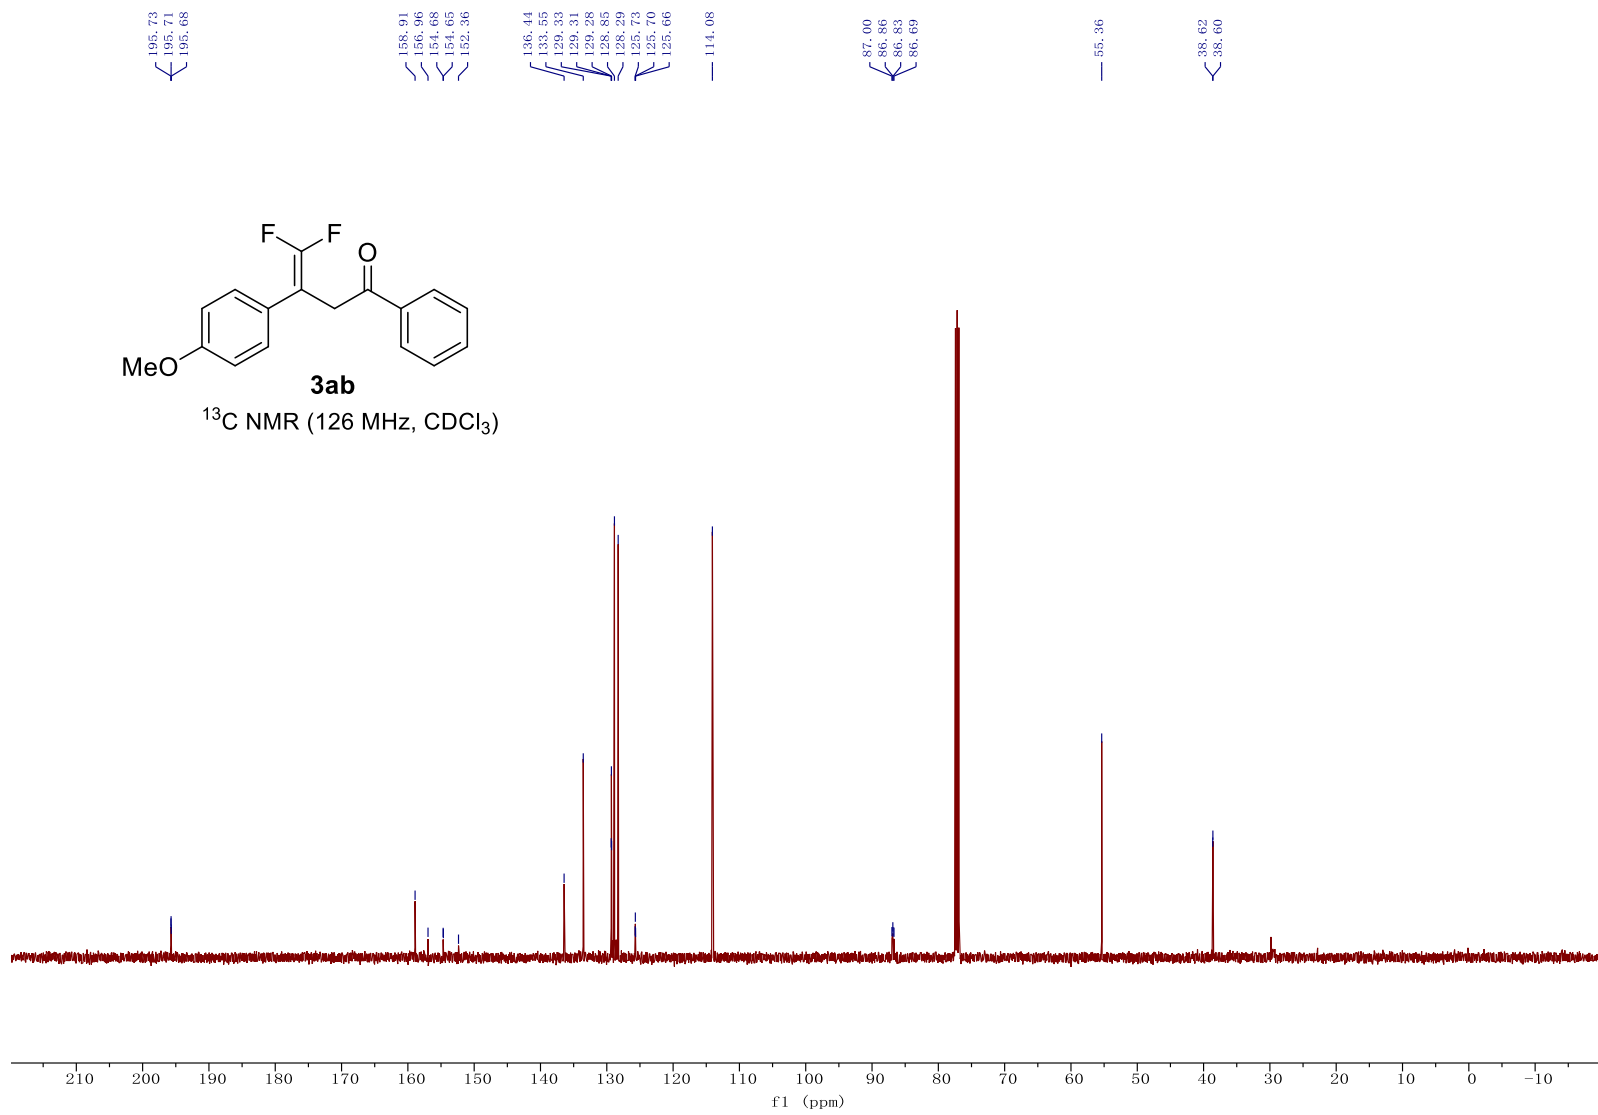

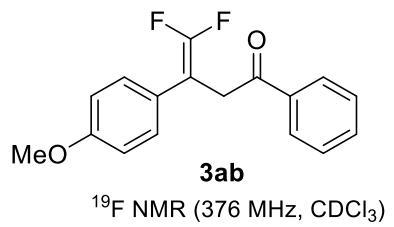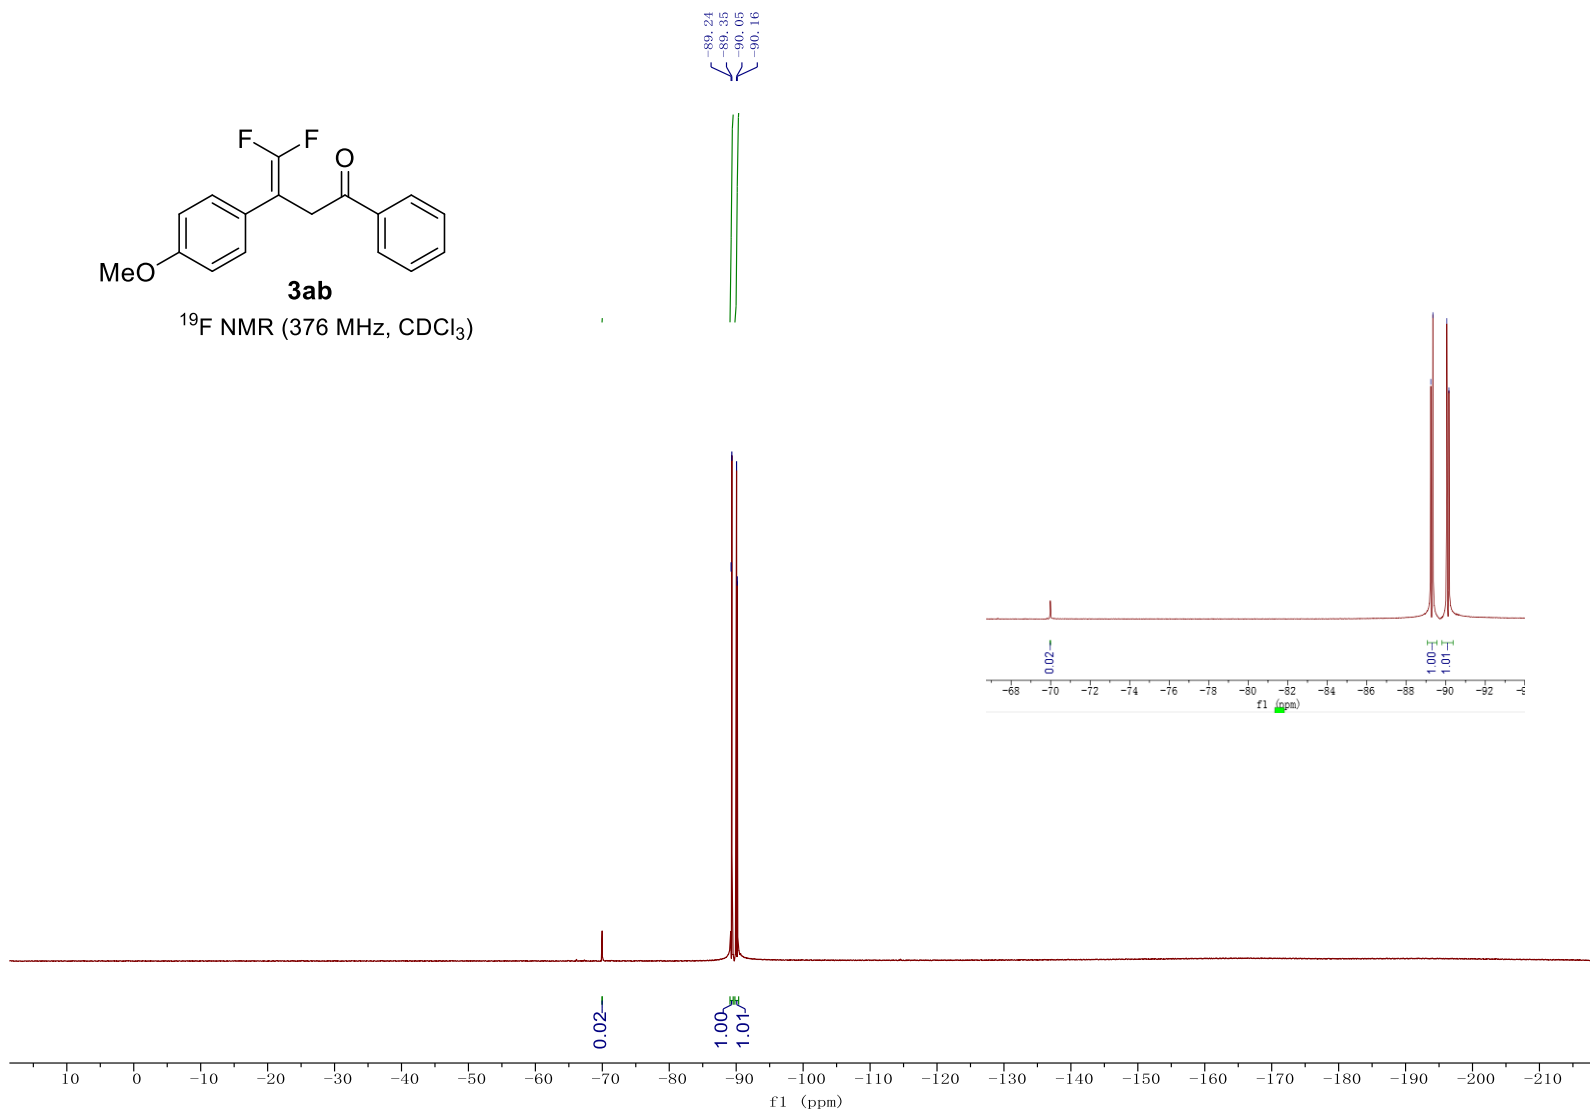



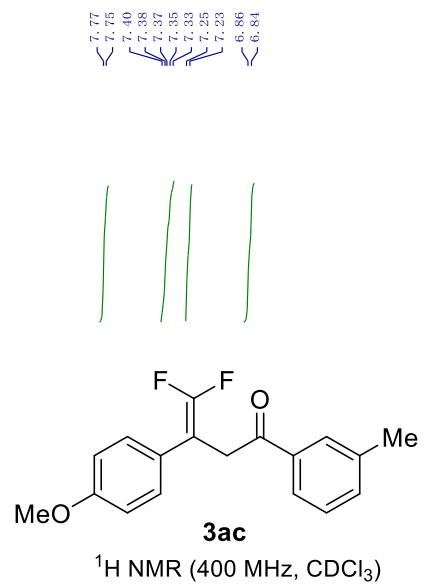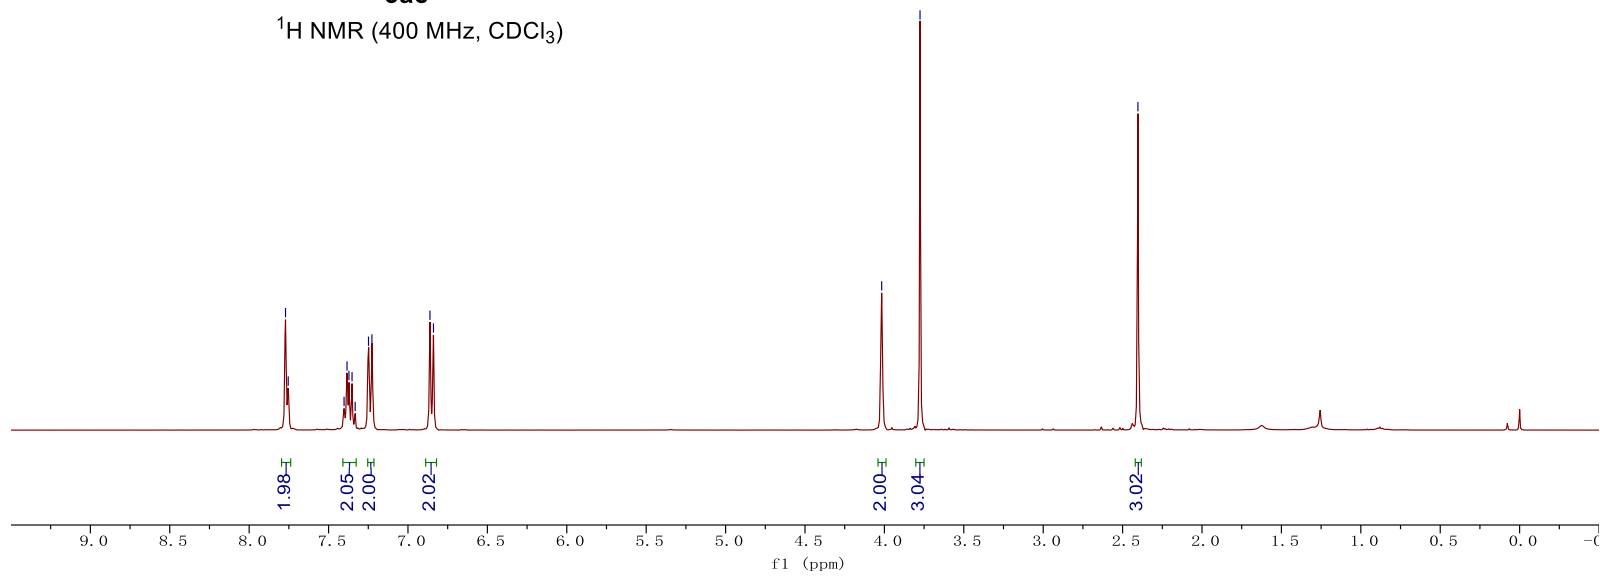

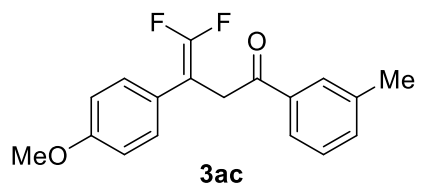

<sup>13</sup>C NMR (126 MHz, CDCl<sub>3</sub>)

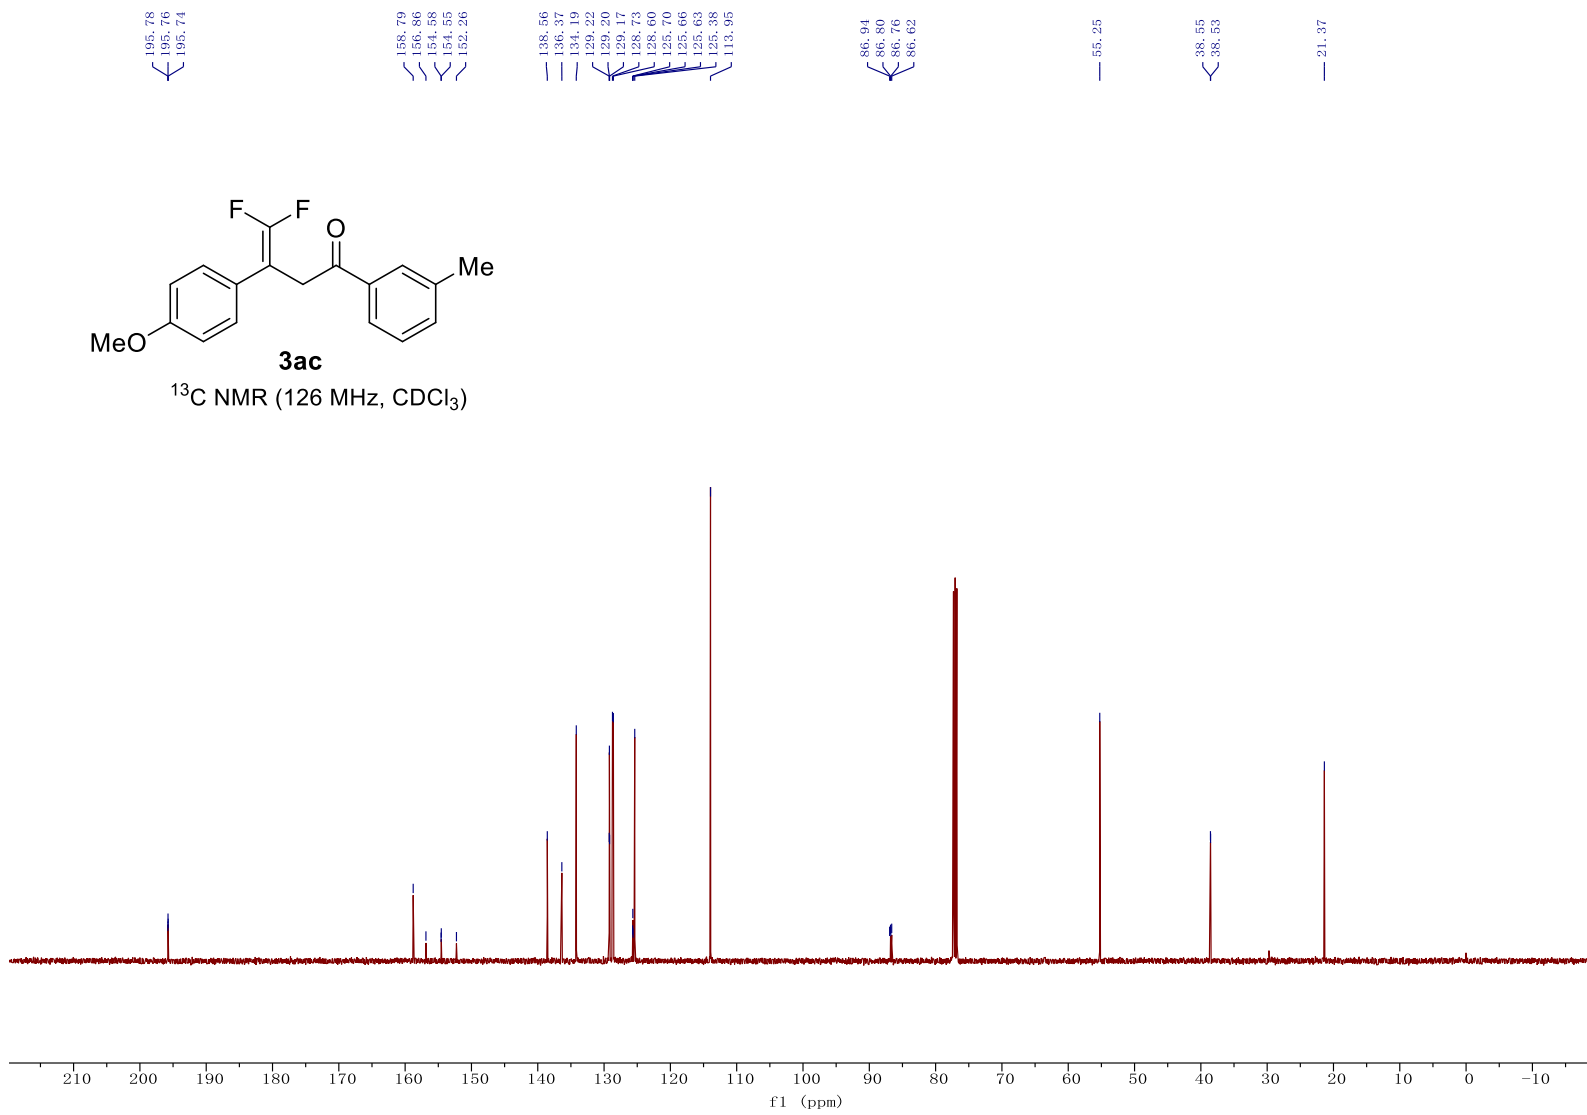

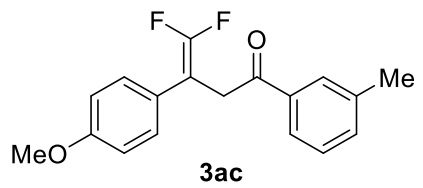

$^{19}\text{F}$  NMR (376 MHz,  $\text{CDCl}_3$ )

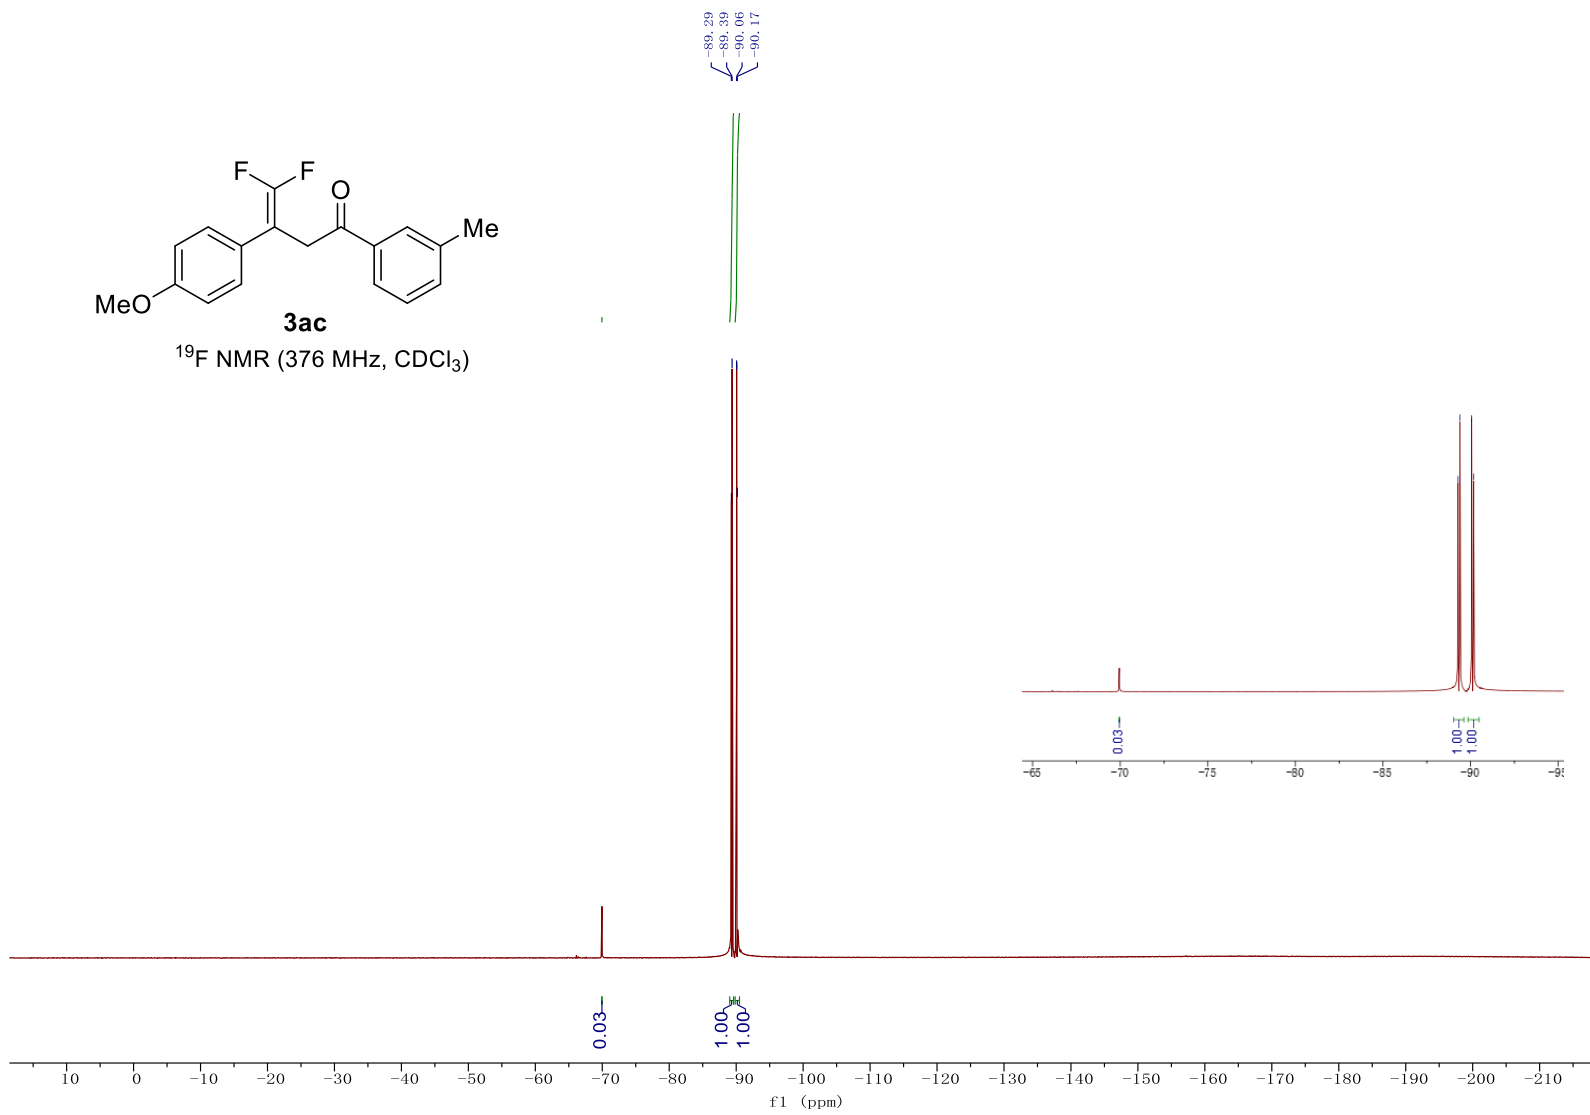

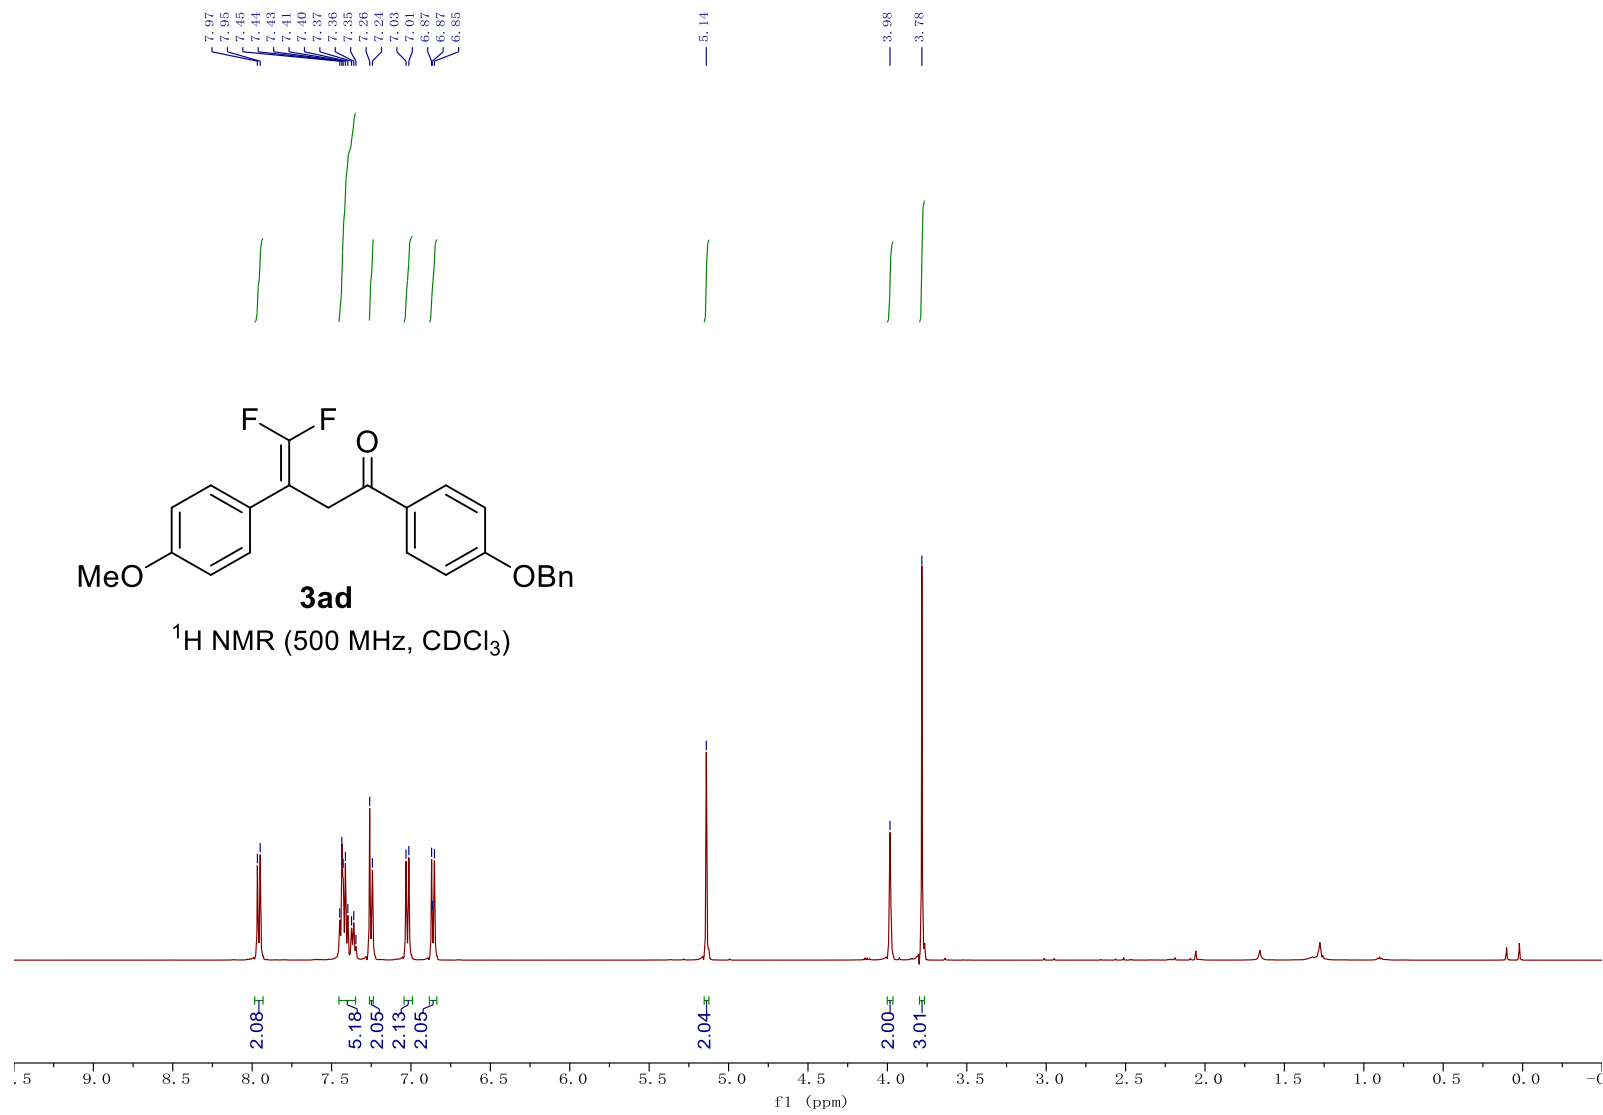

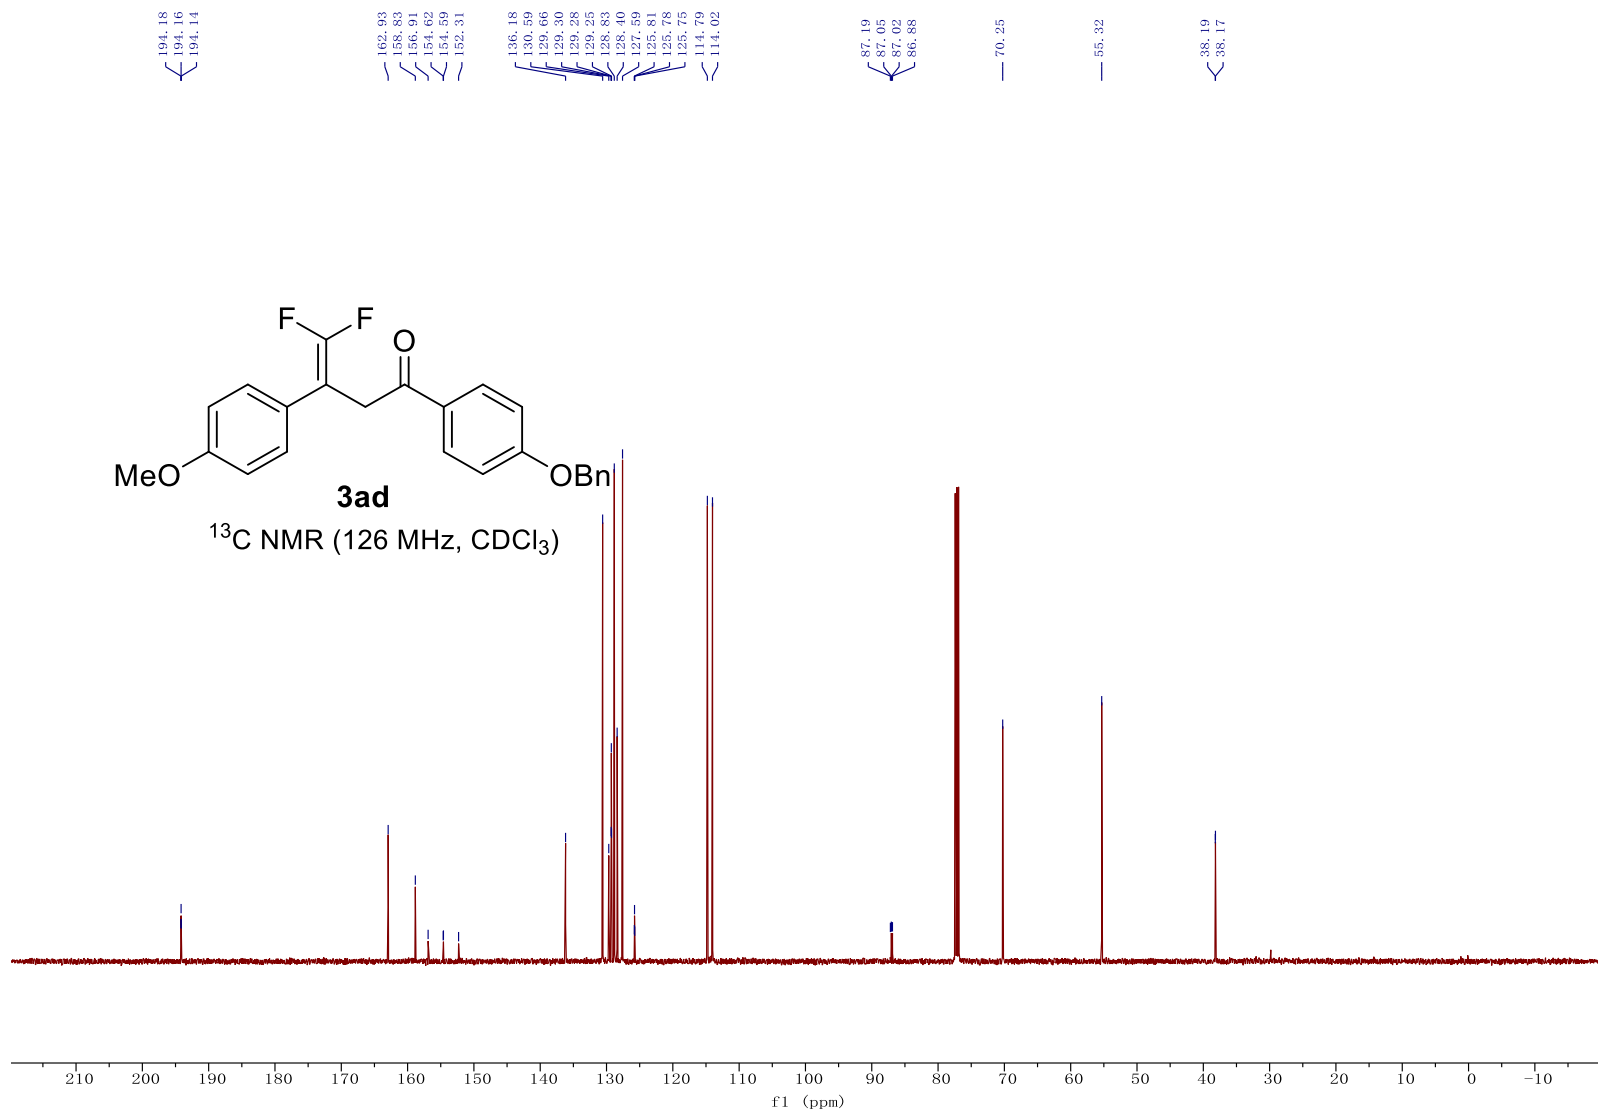

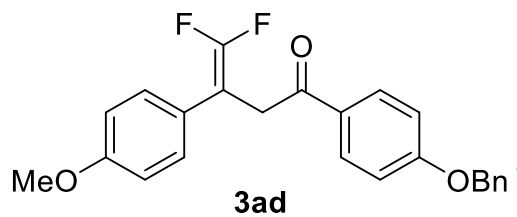

$^{19}\text{F}$  NMR (471 MHz,  $\text{CDCl}_3$ )

-89.38  
-89.46  
-90.18  
-90.27

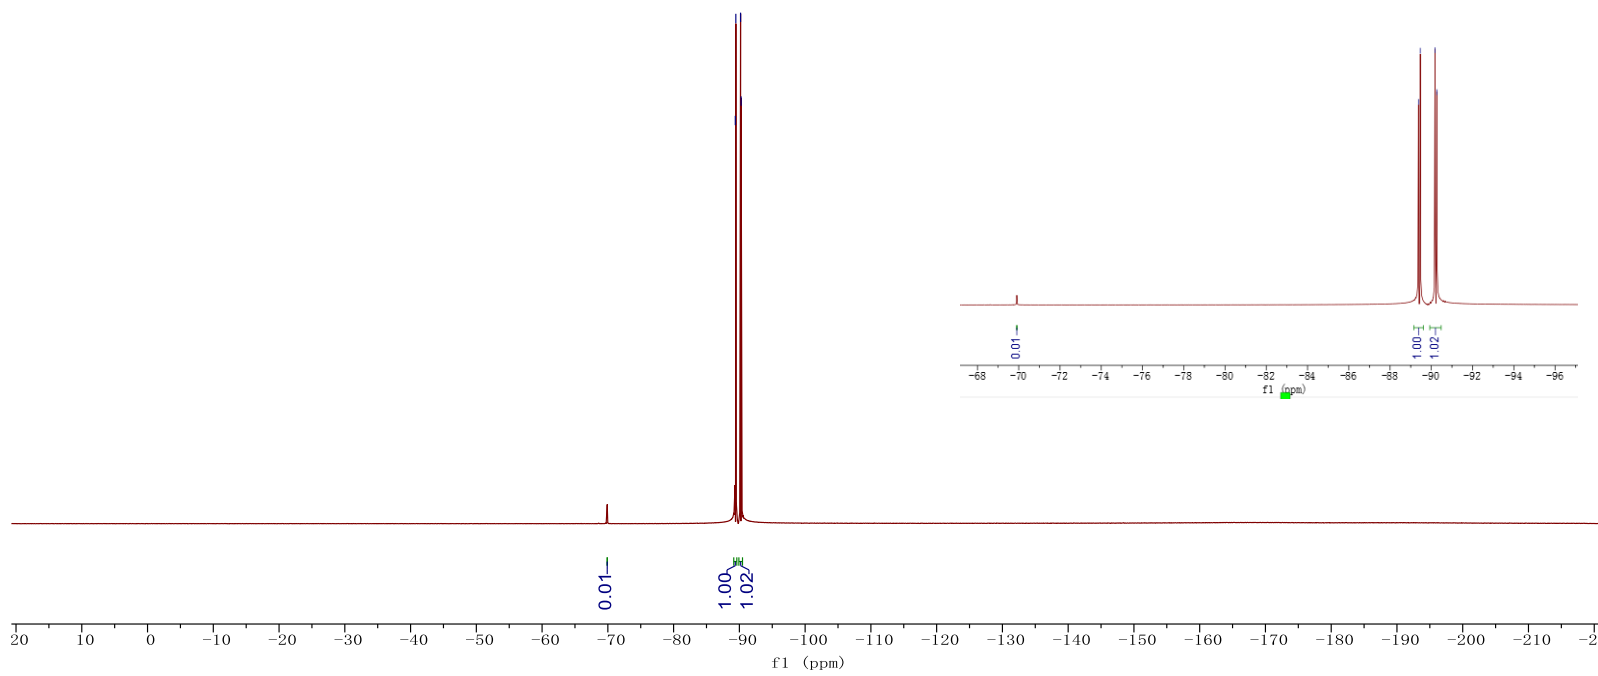

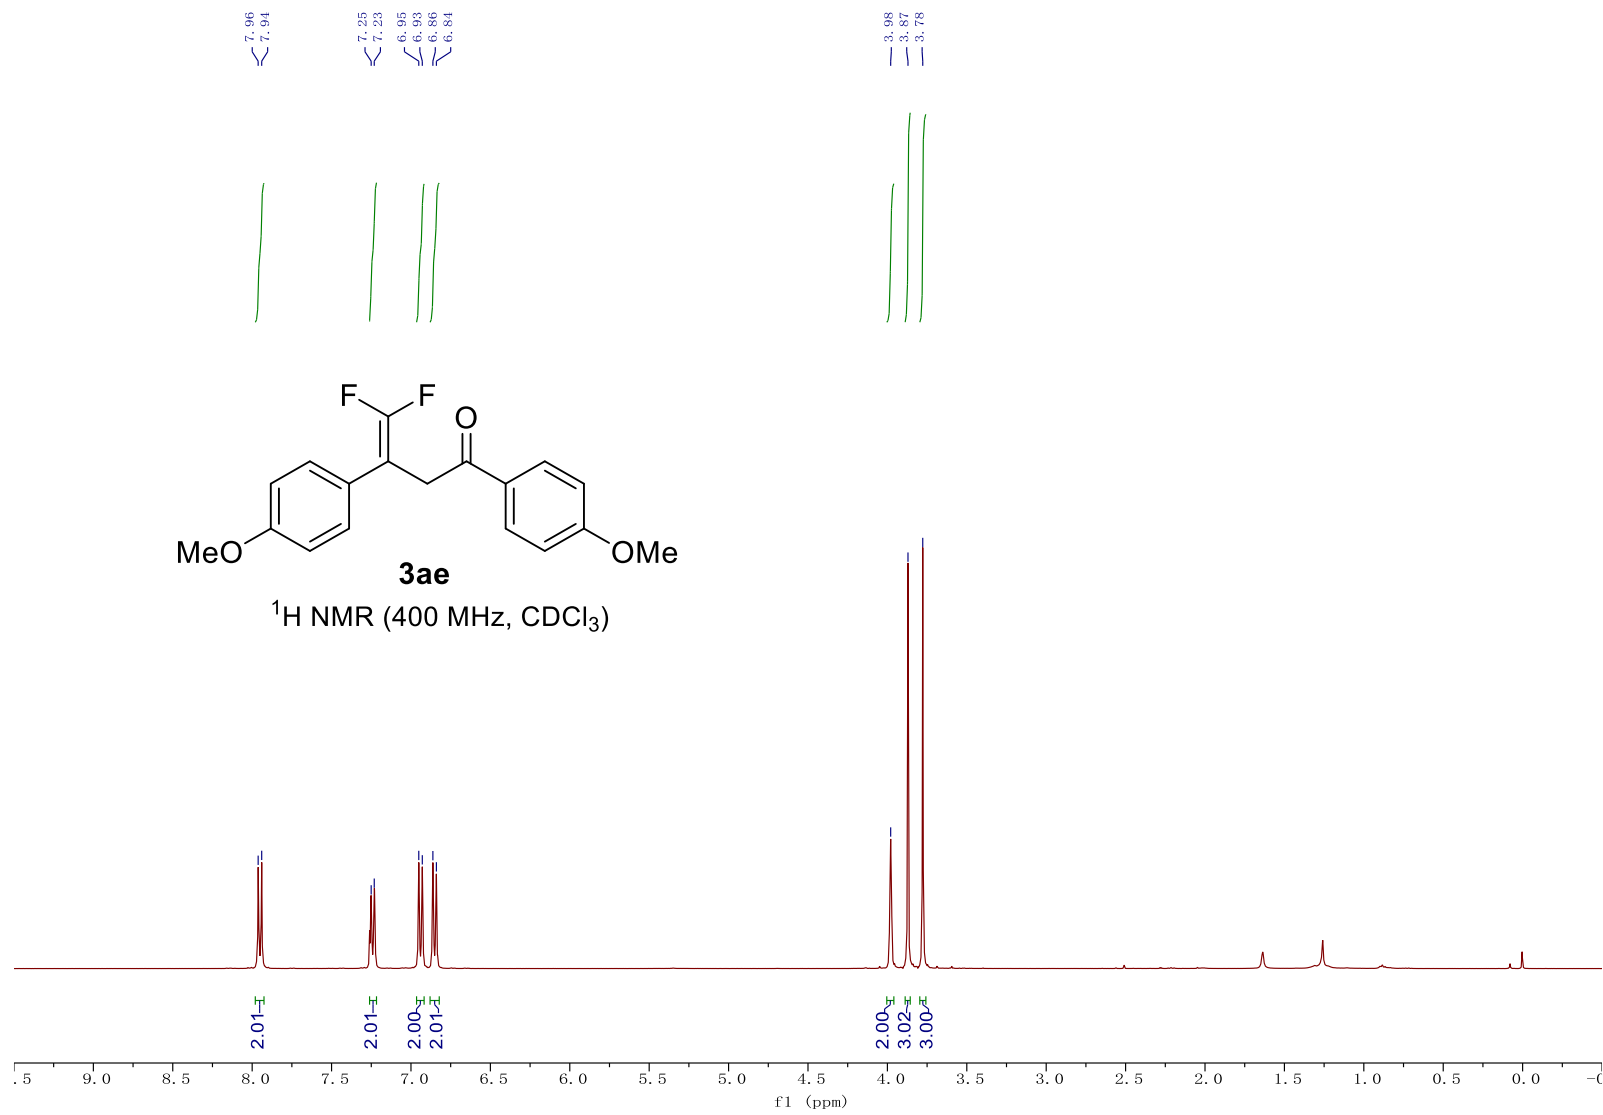

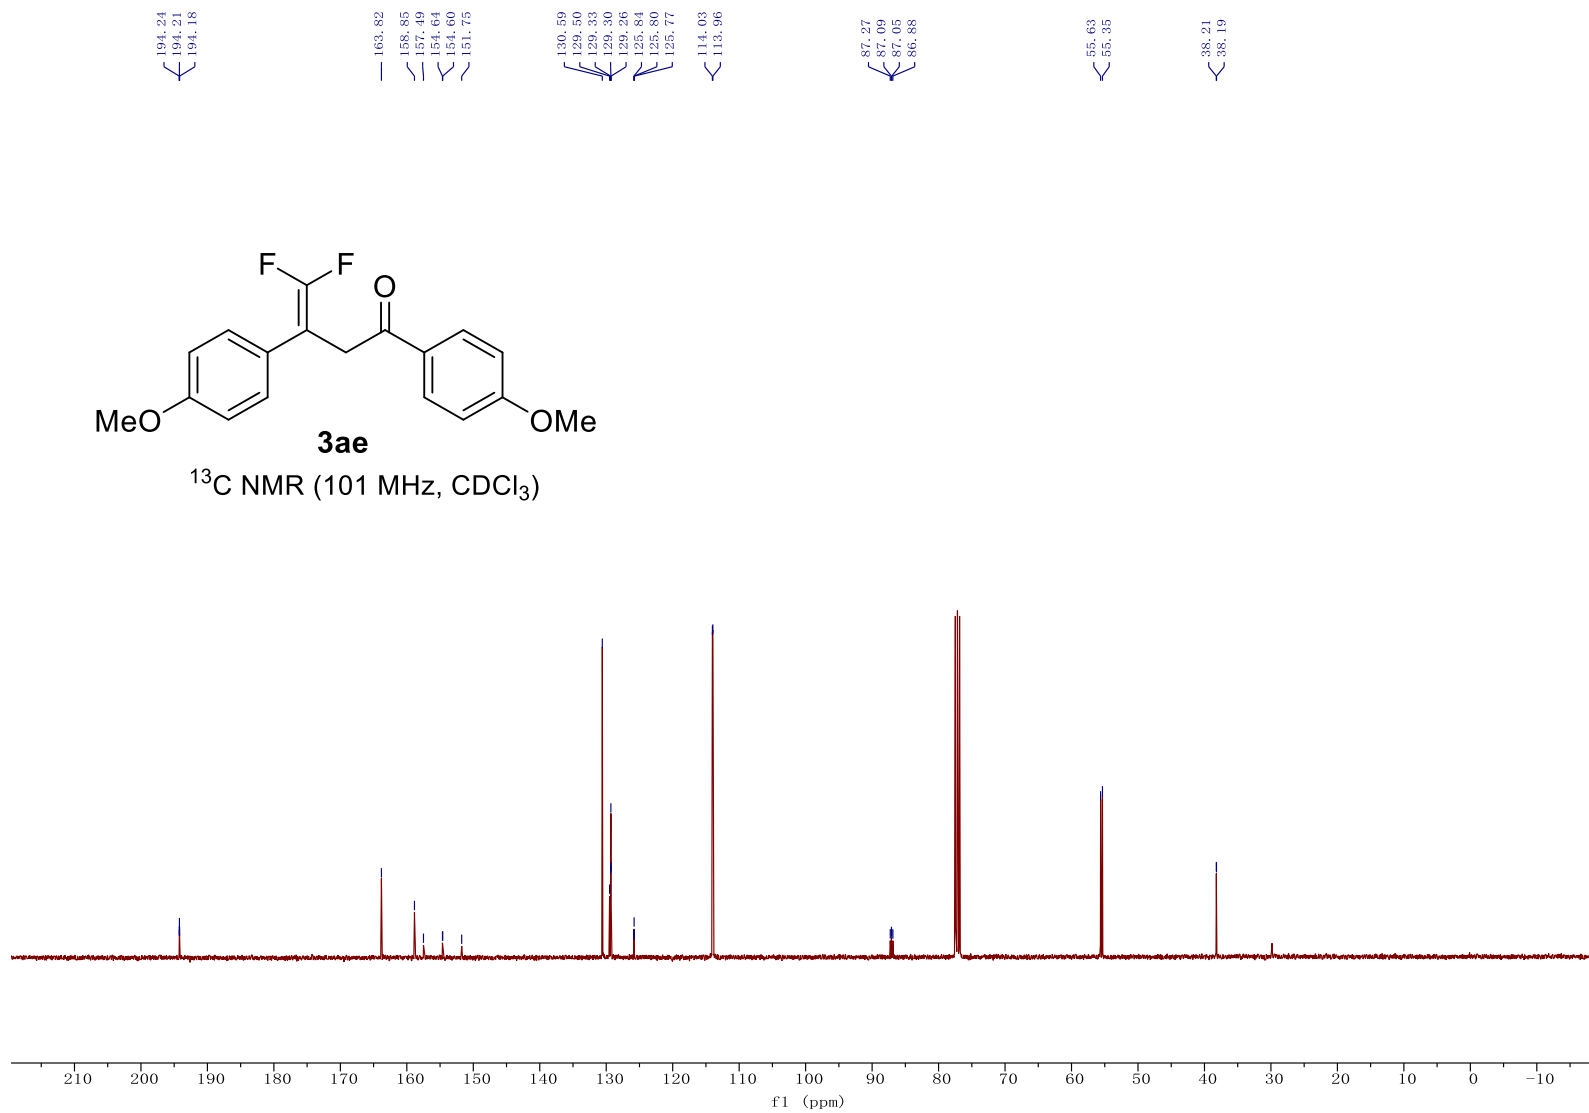



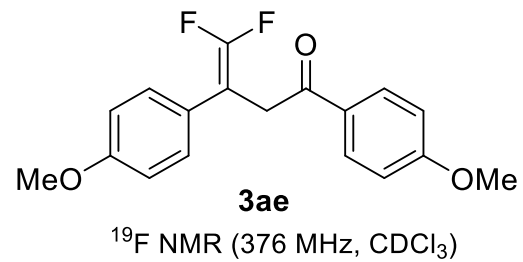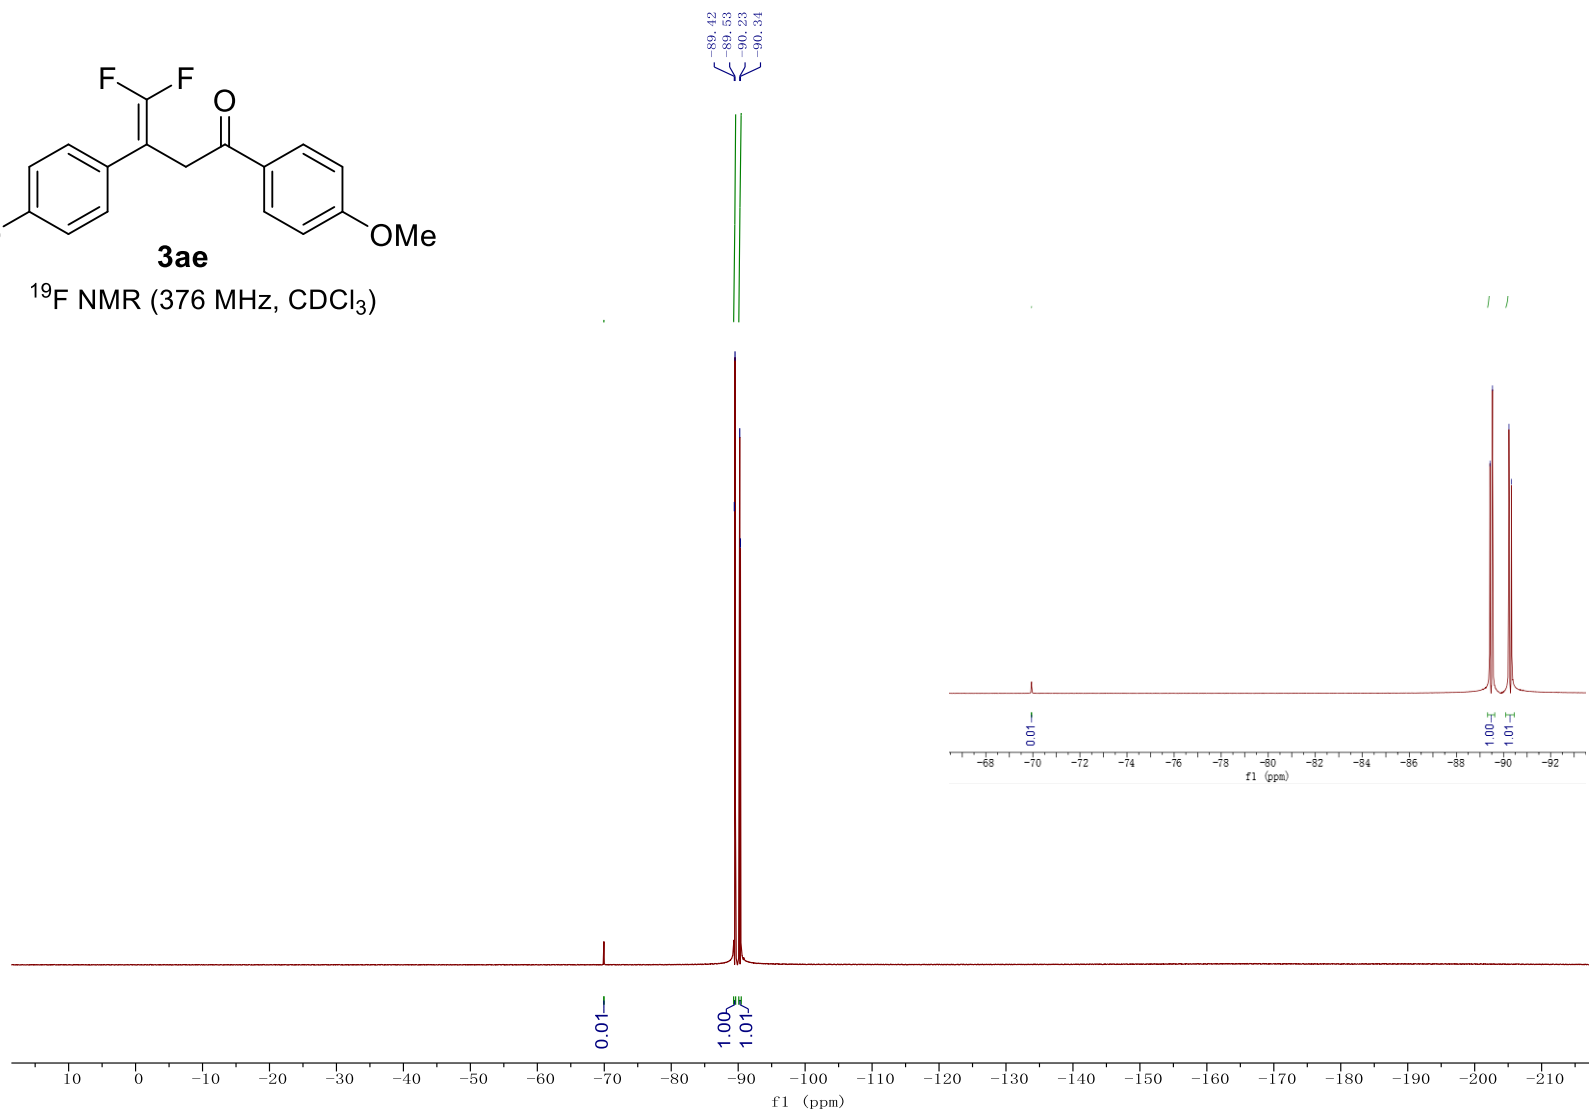

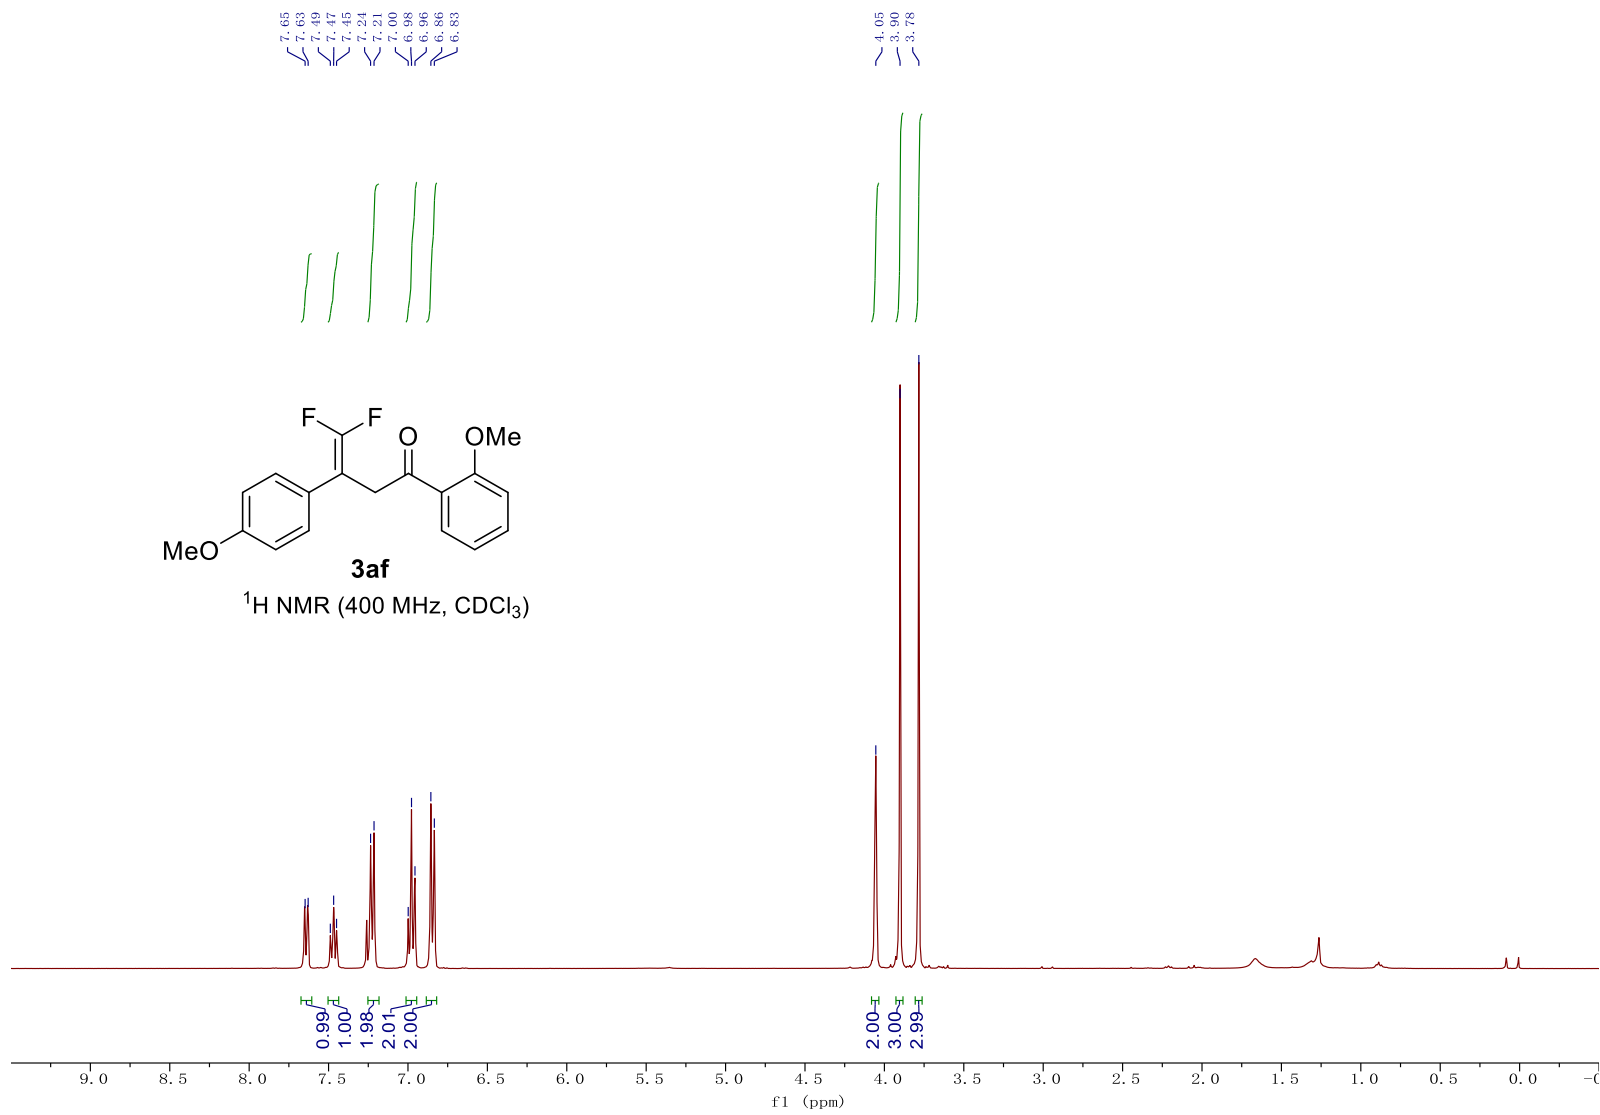

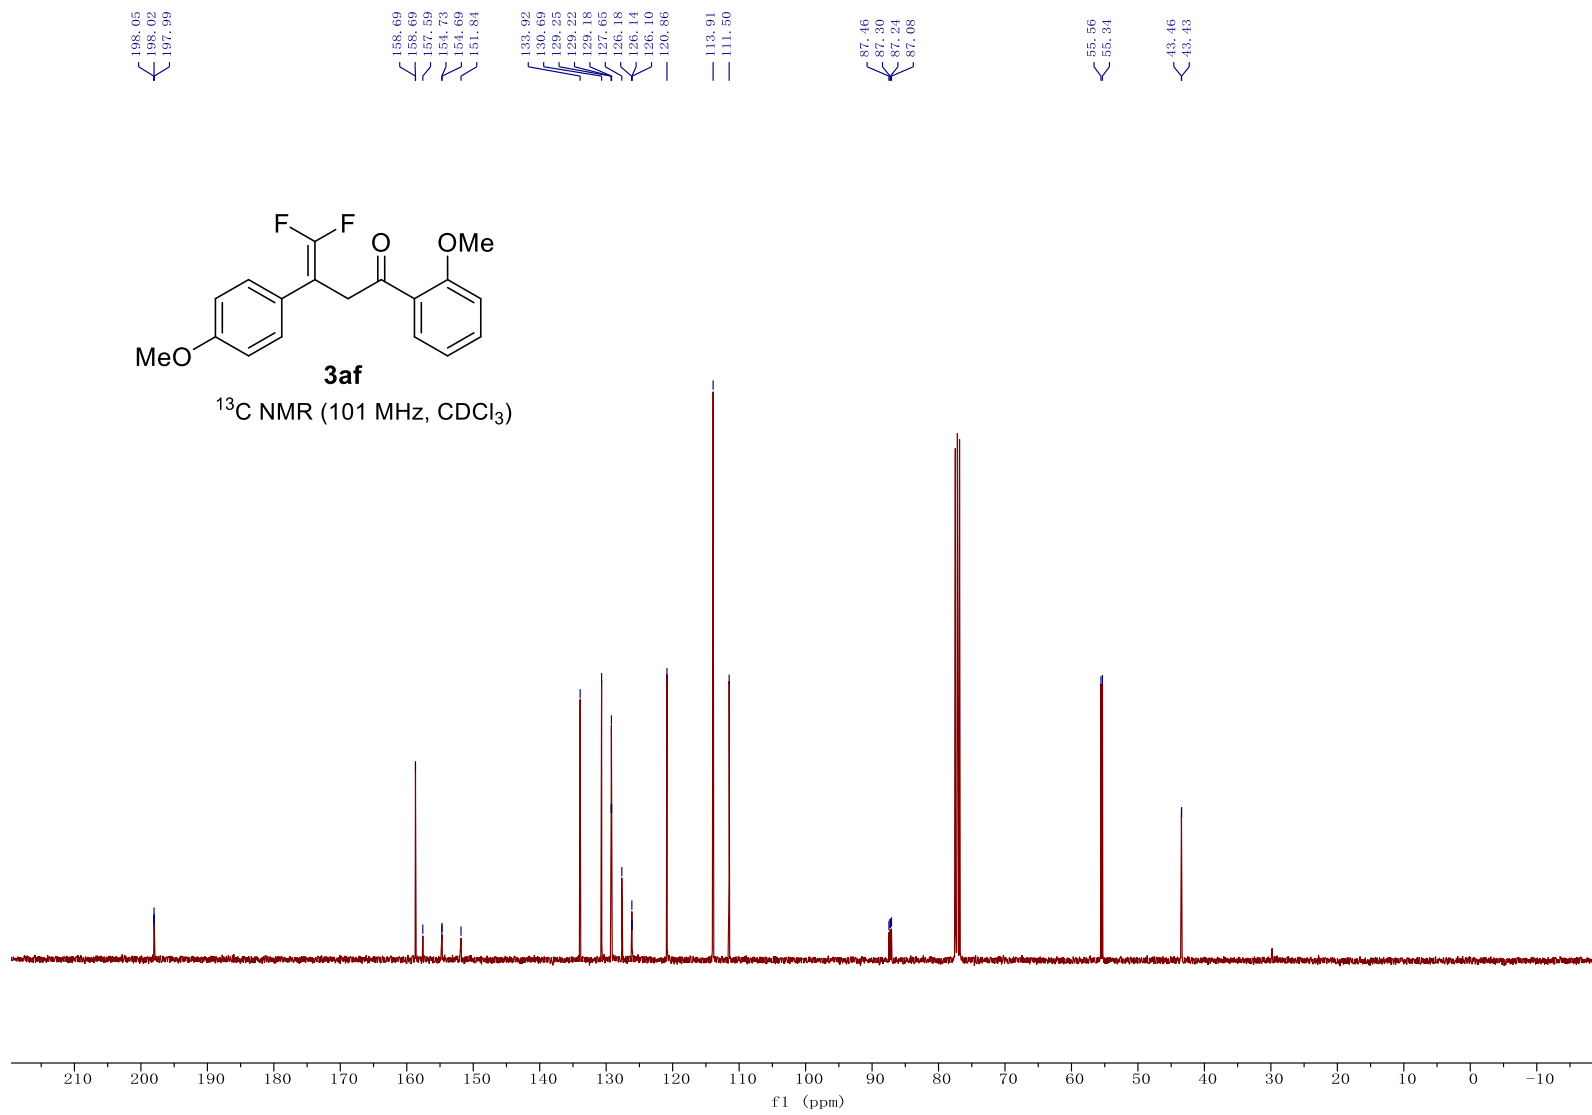

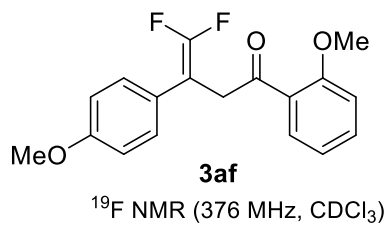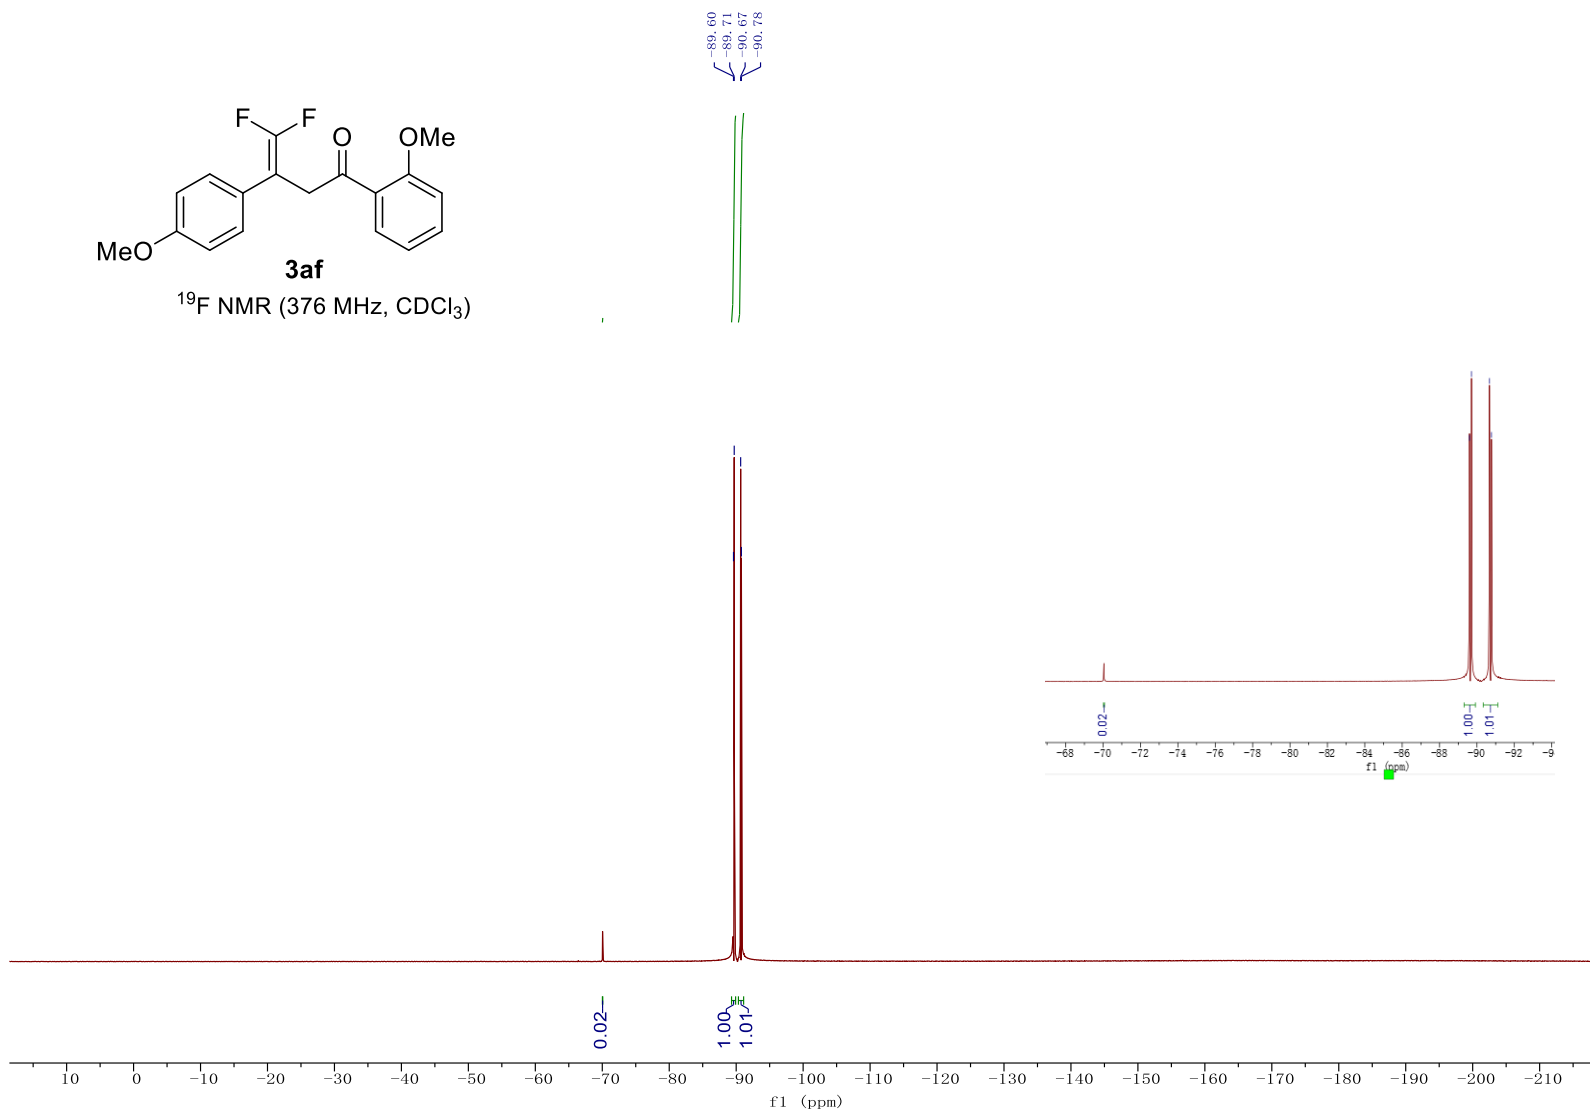

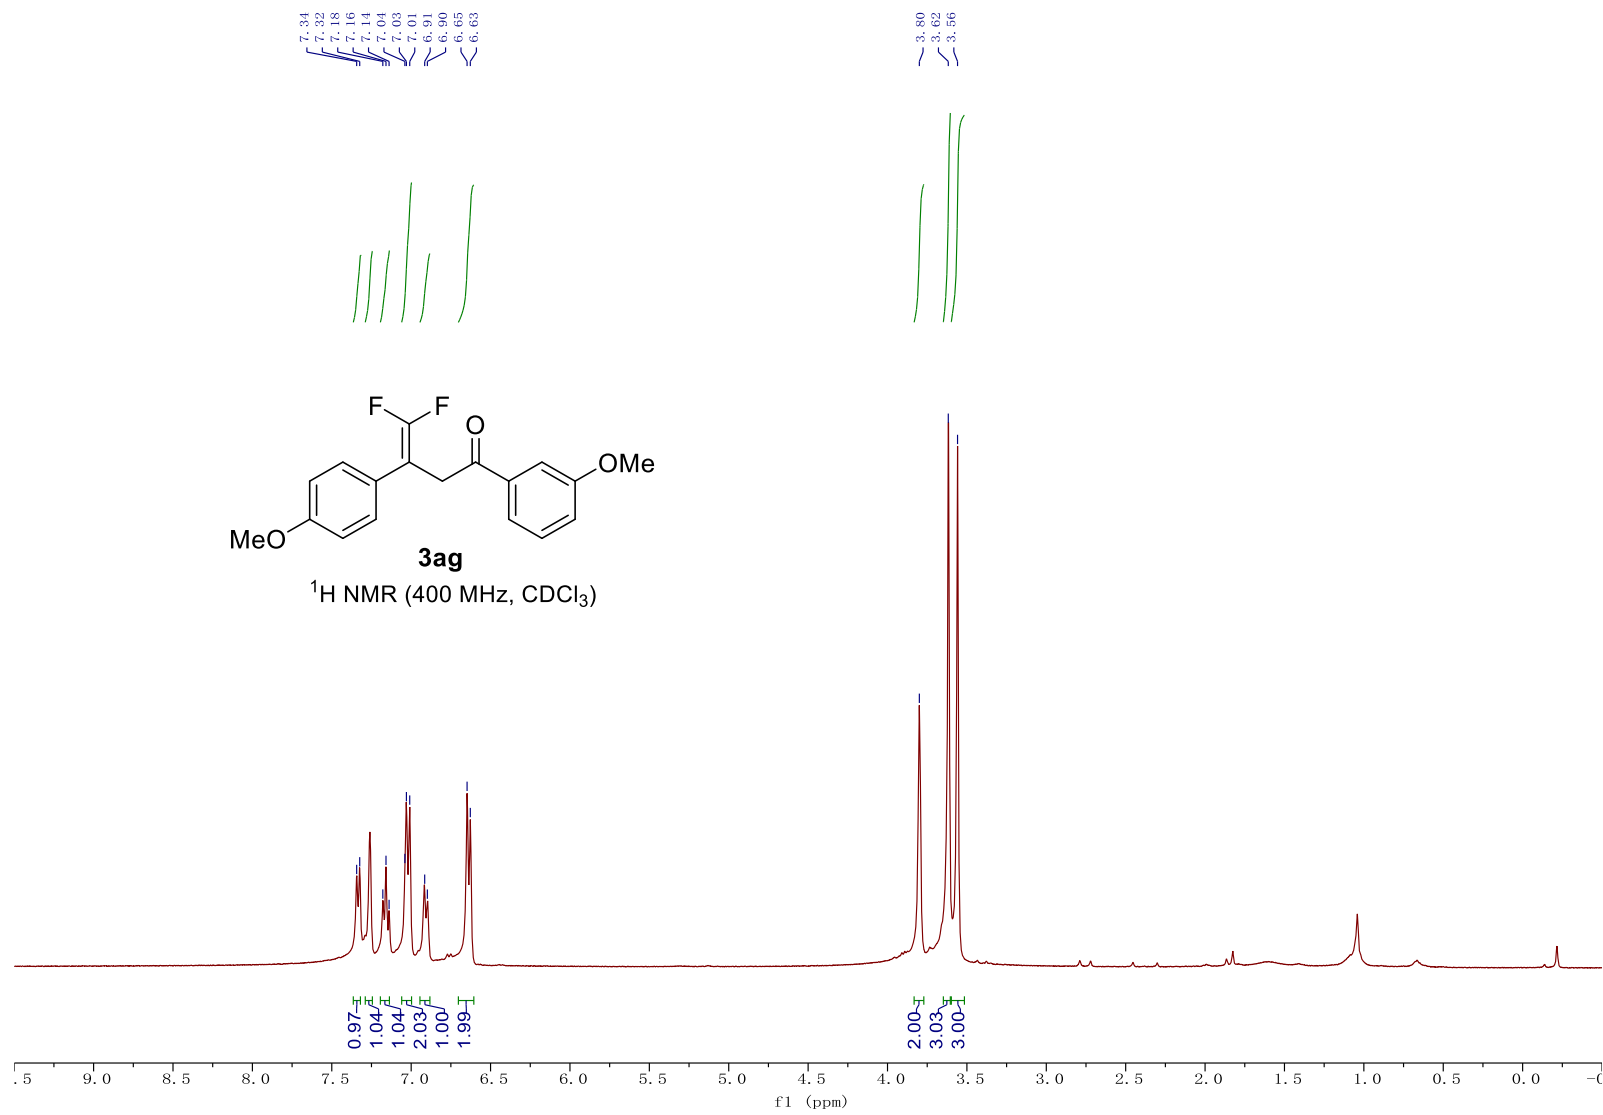

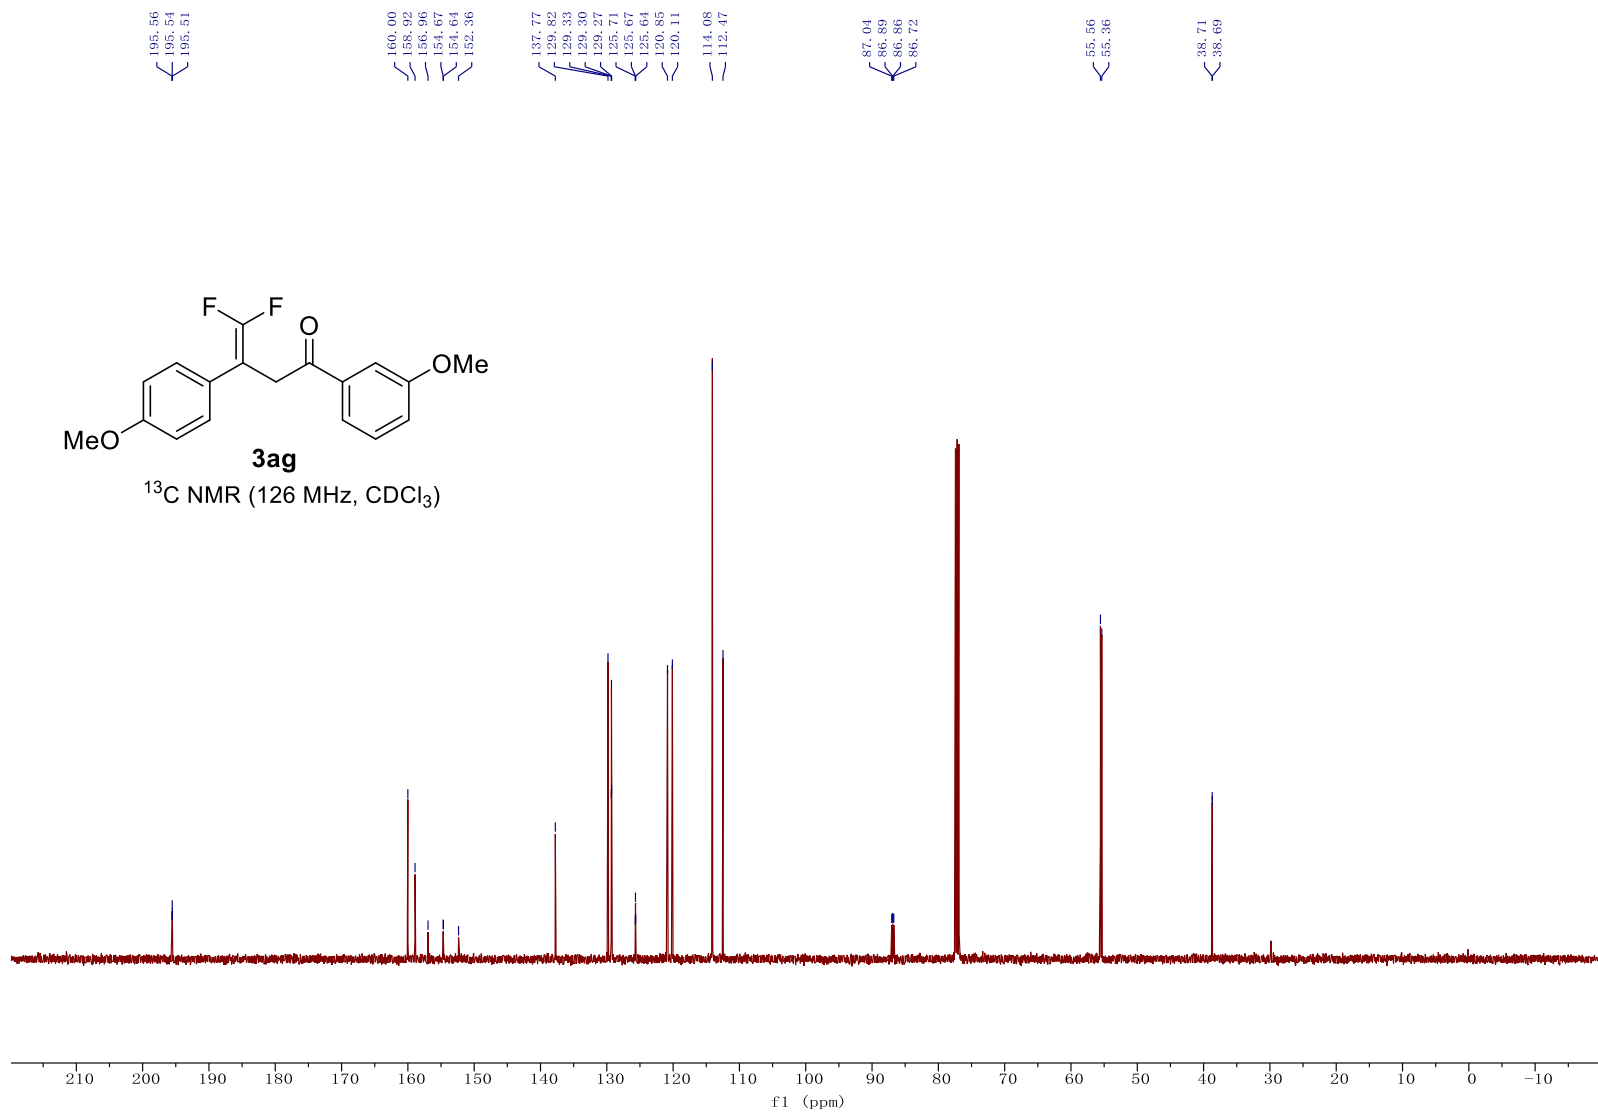

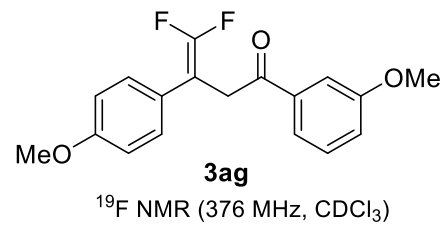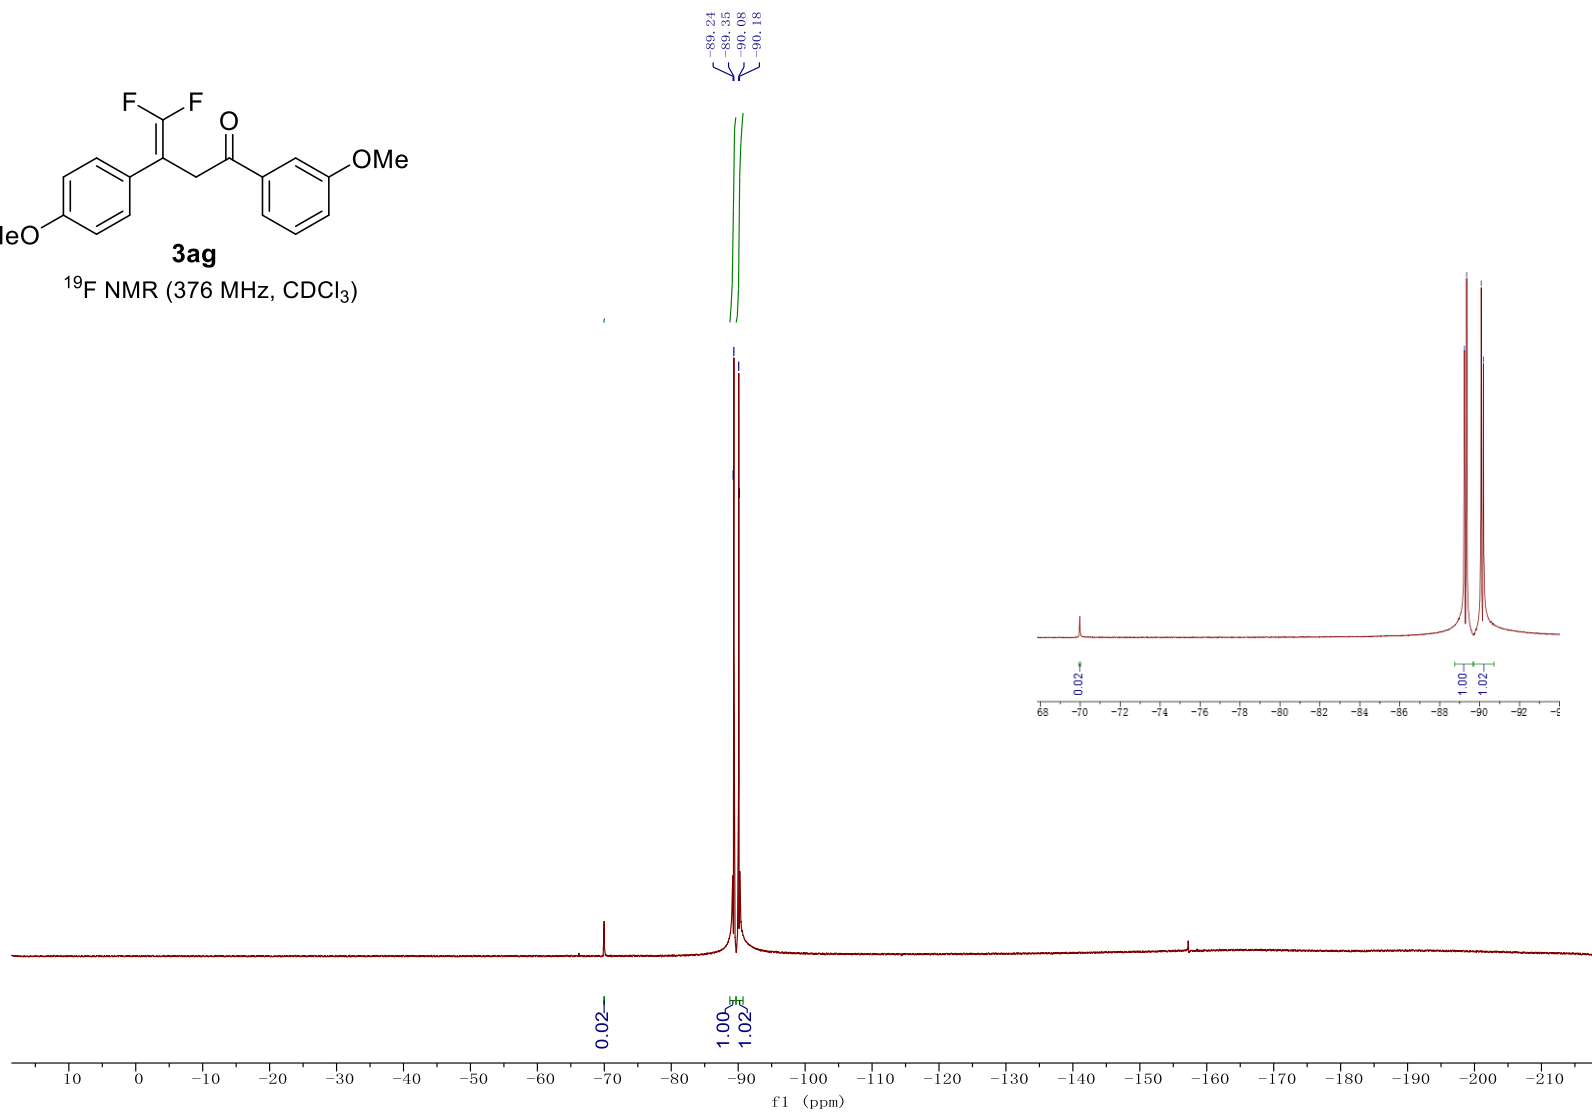

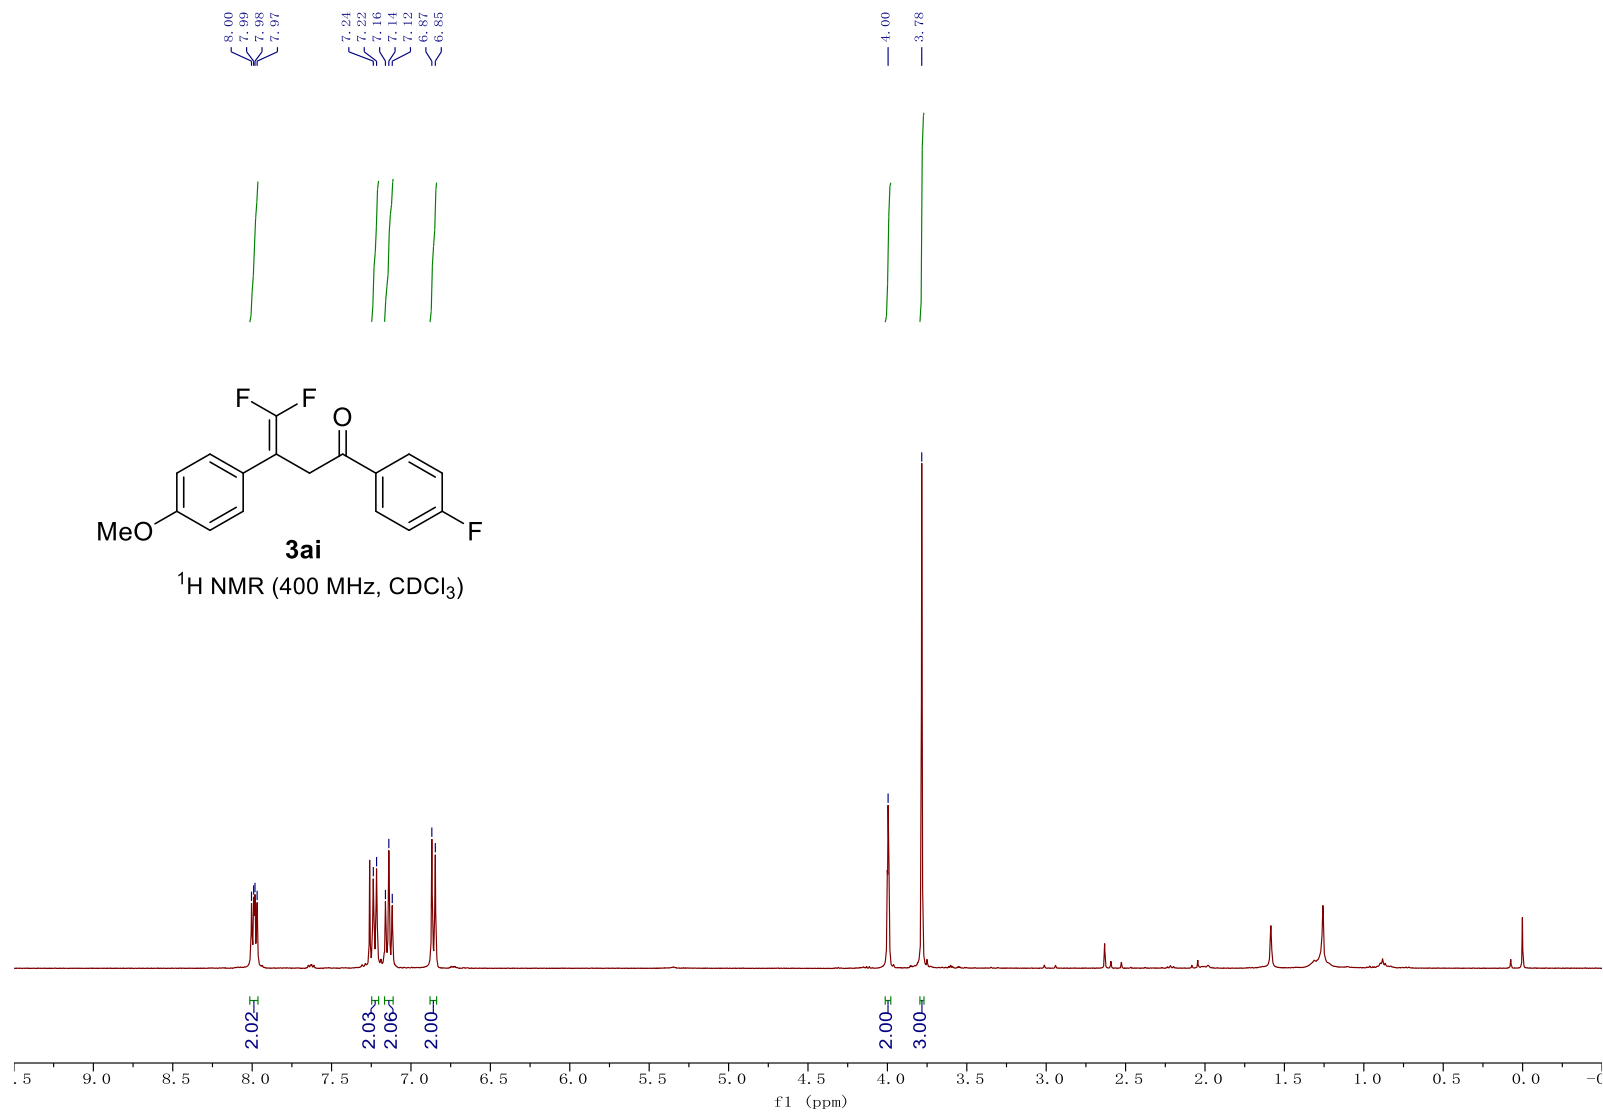



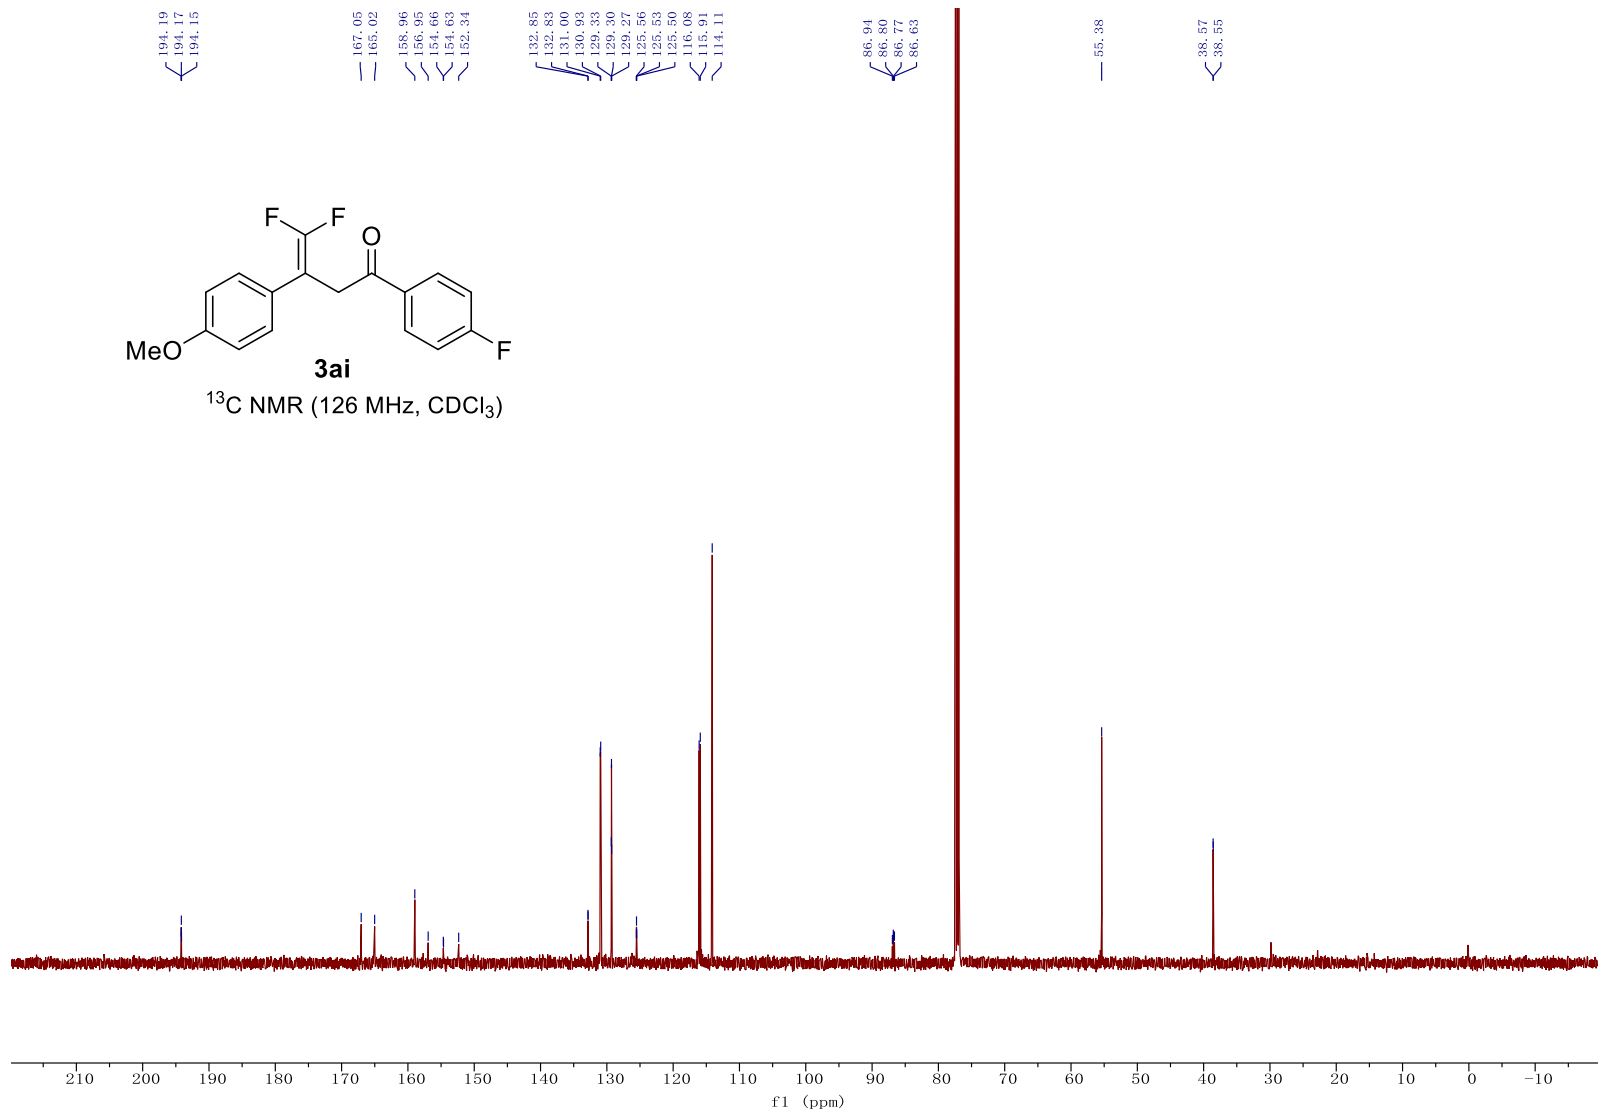

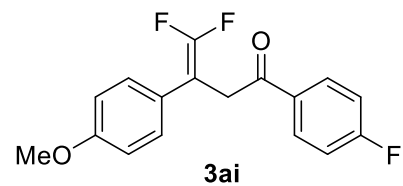

$^{19}\text{F}$  NMR (376 MHz,  $\text{CDCl}_3$ )

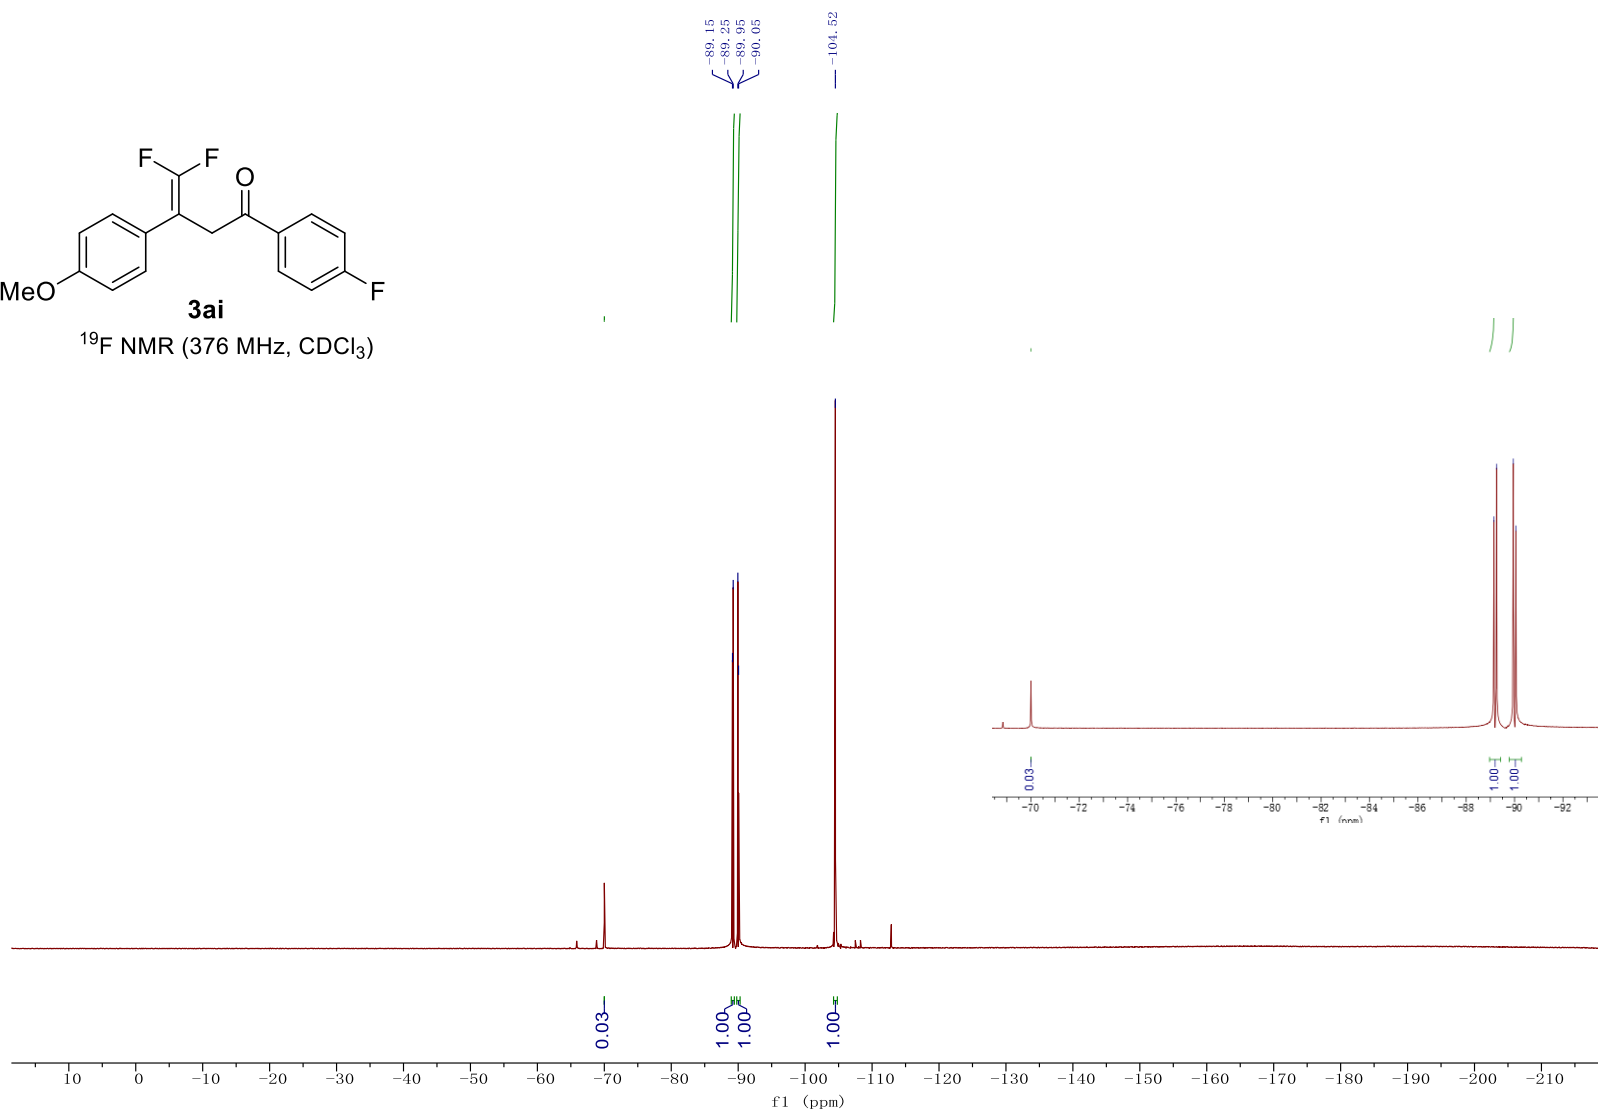

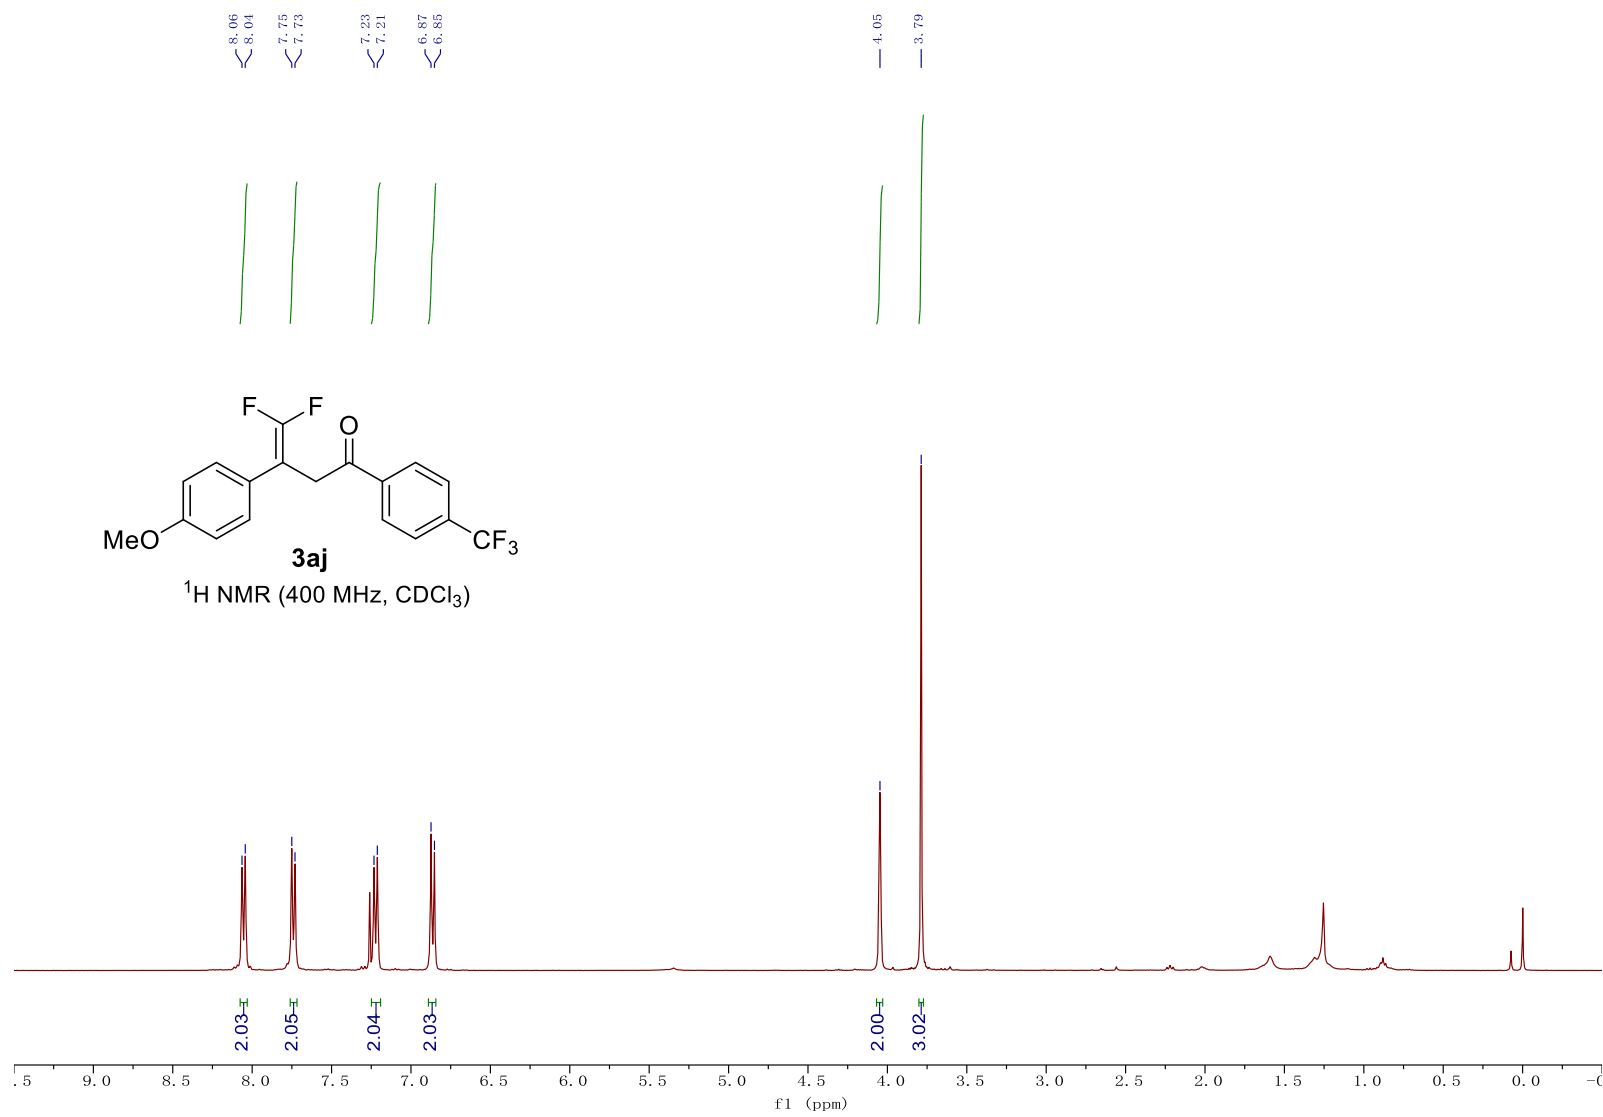

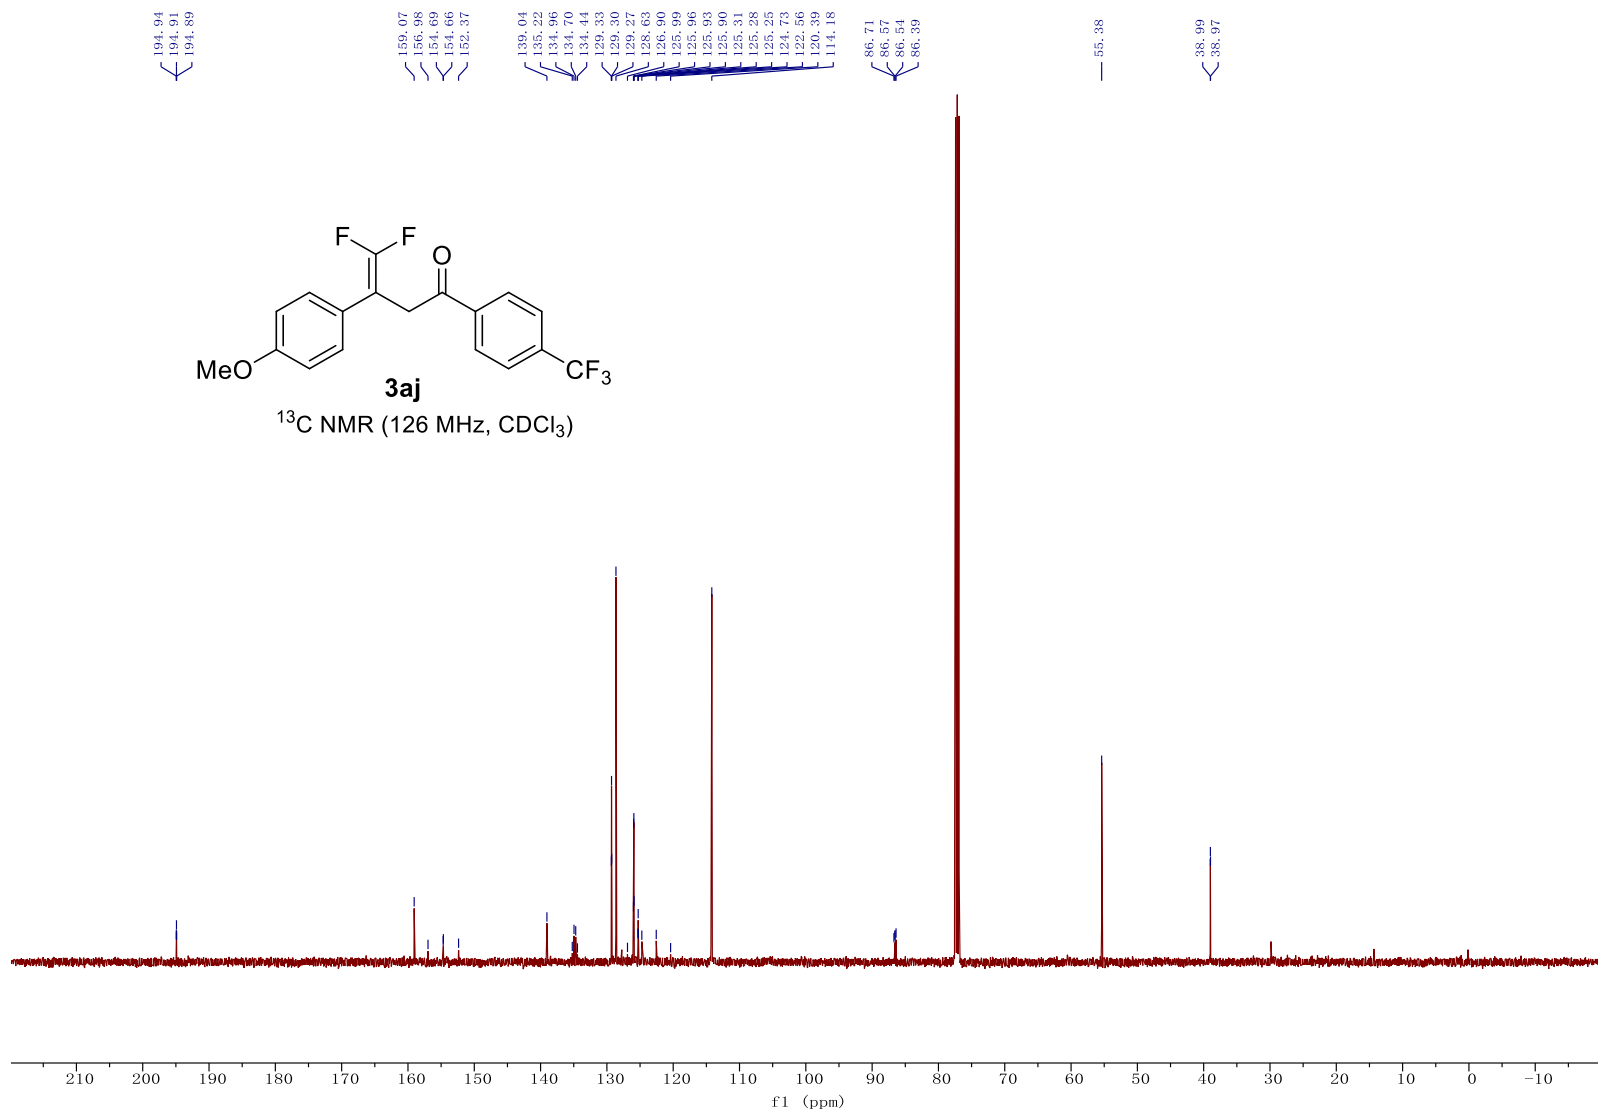

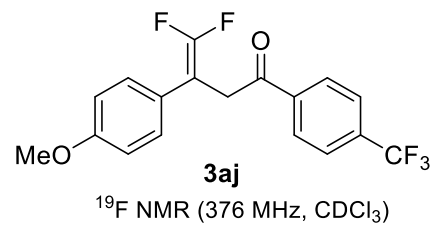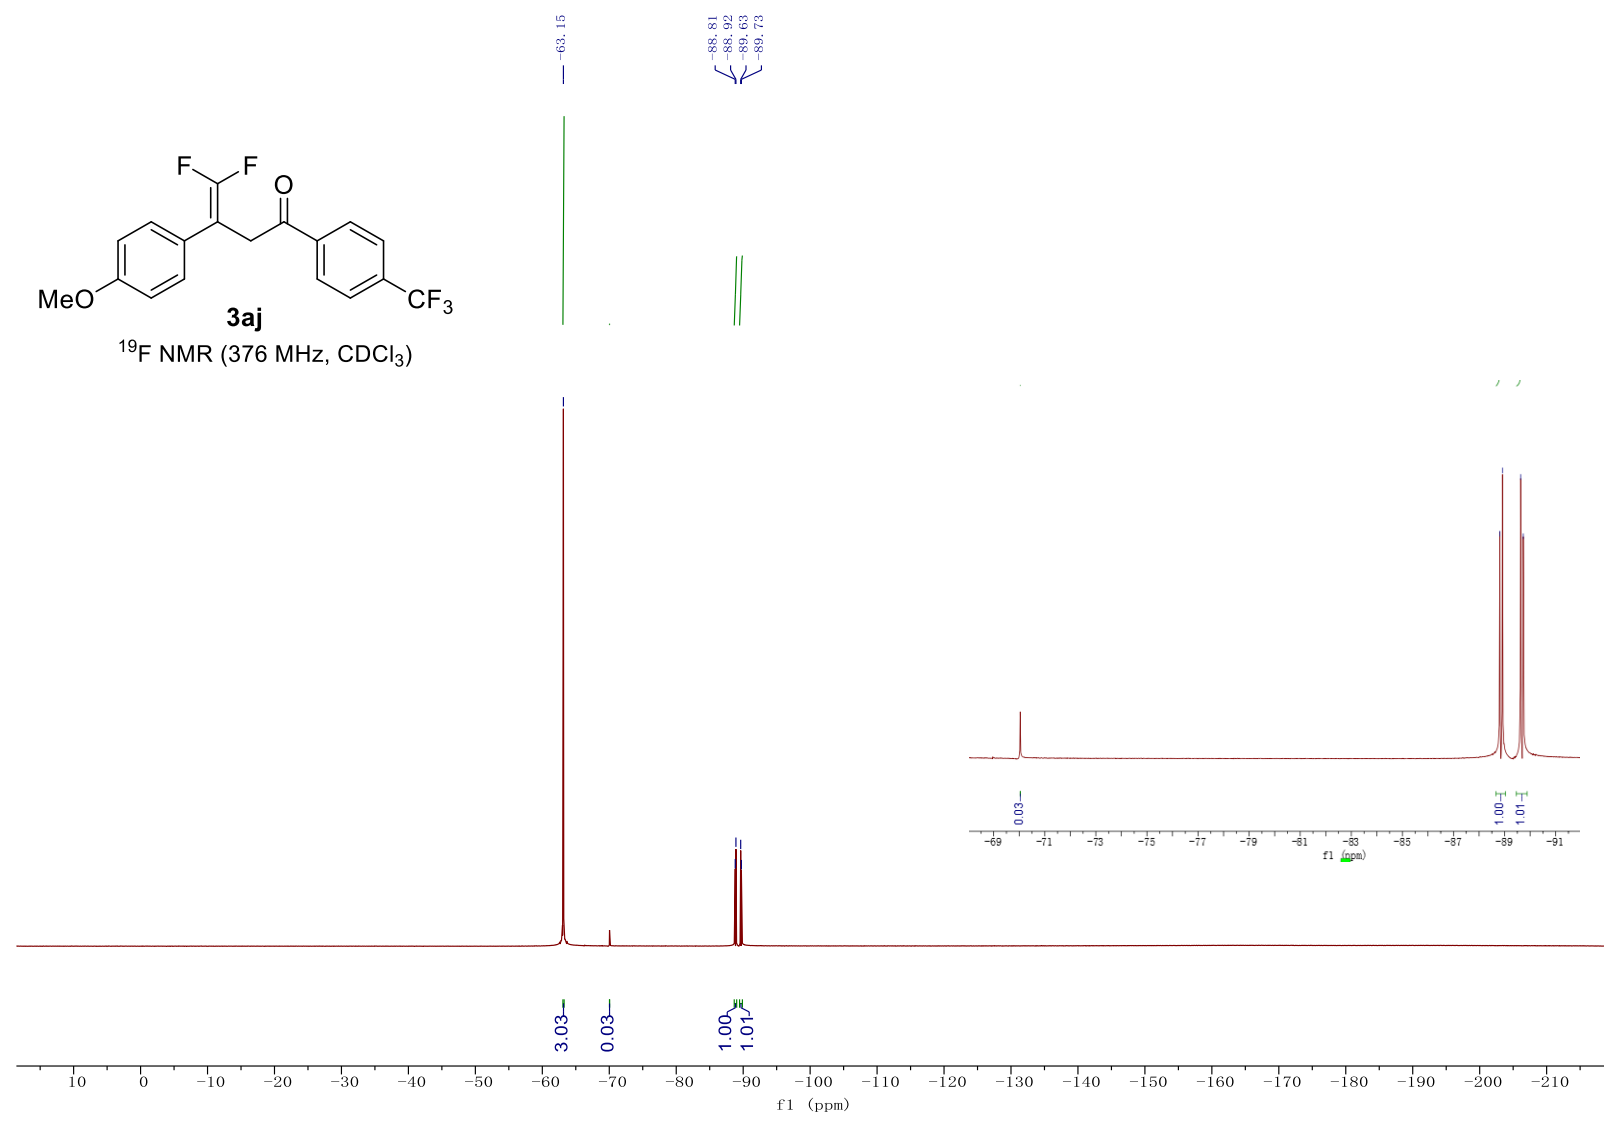

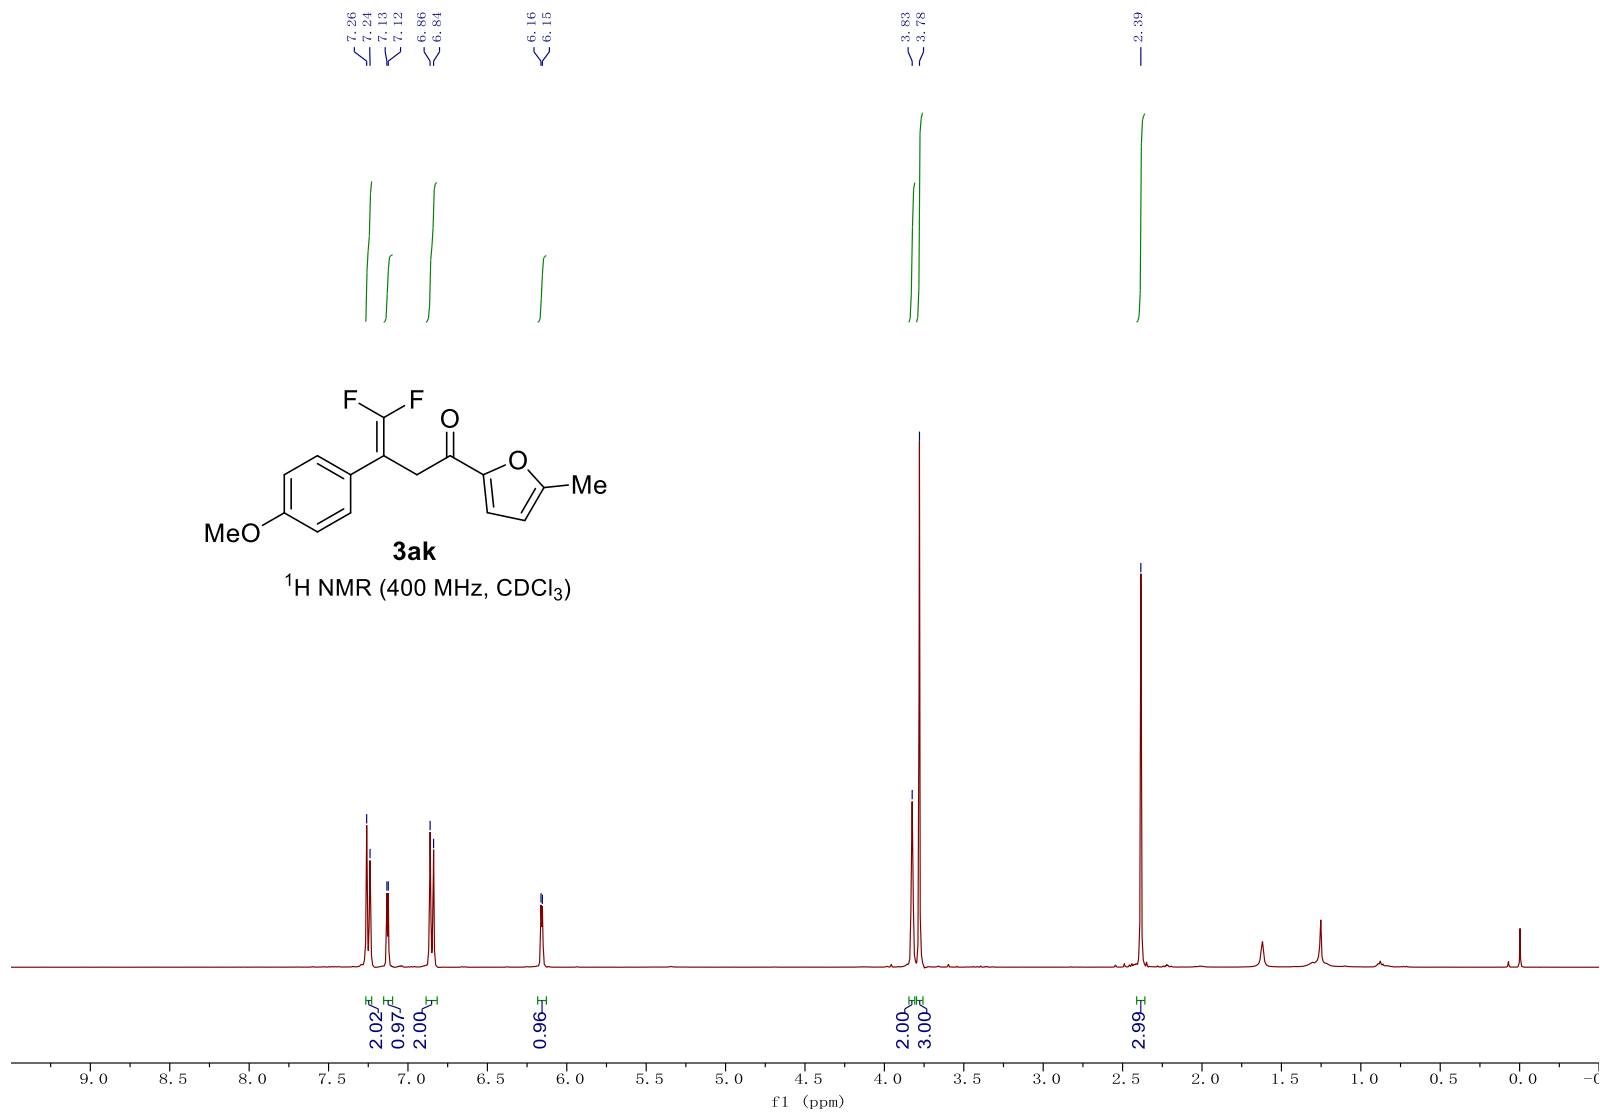

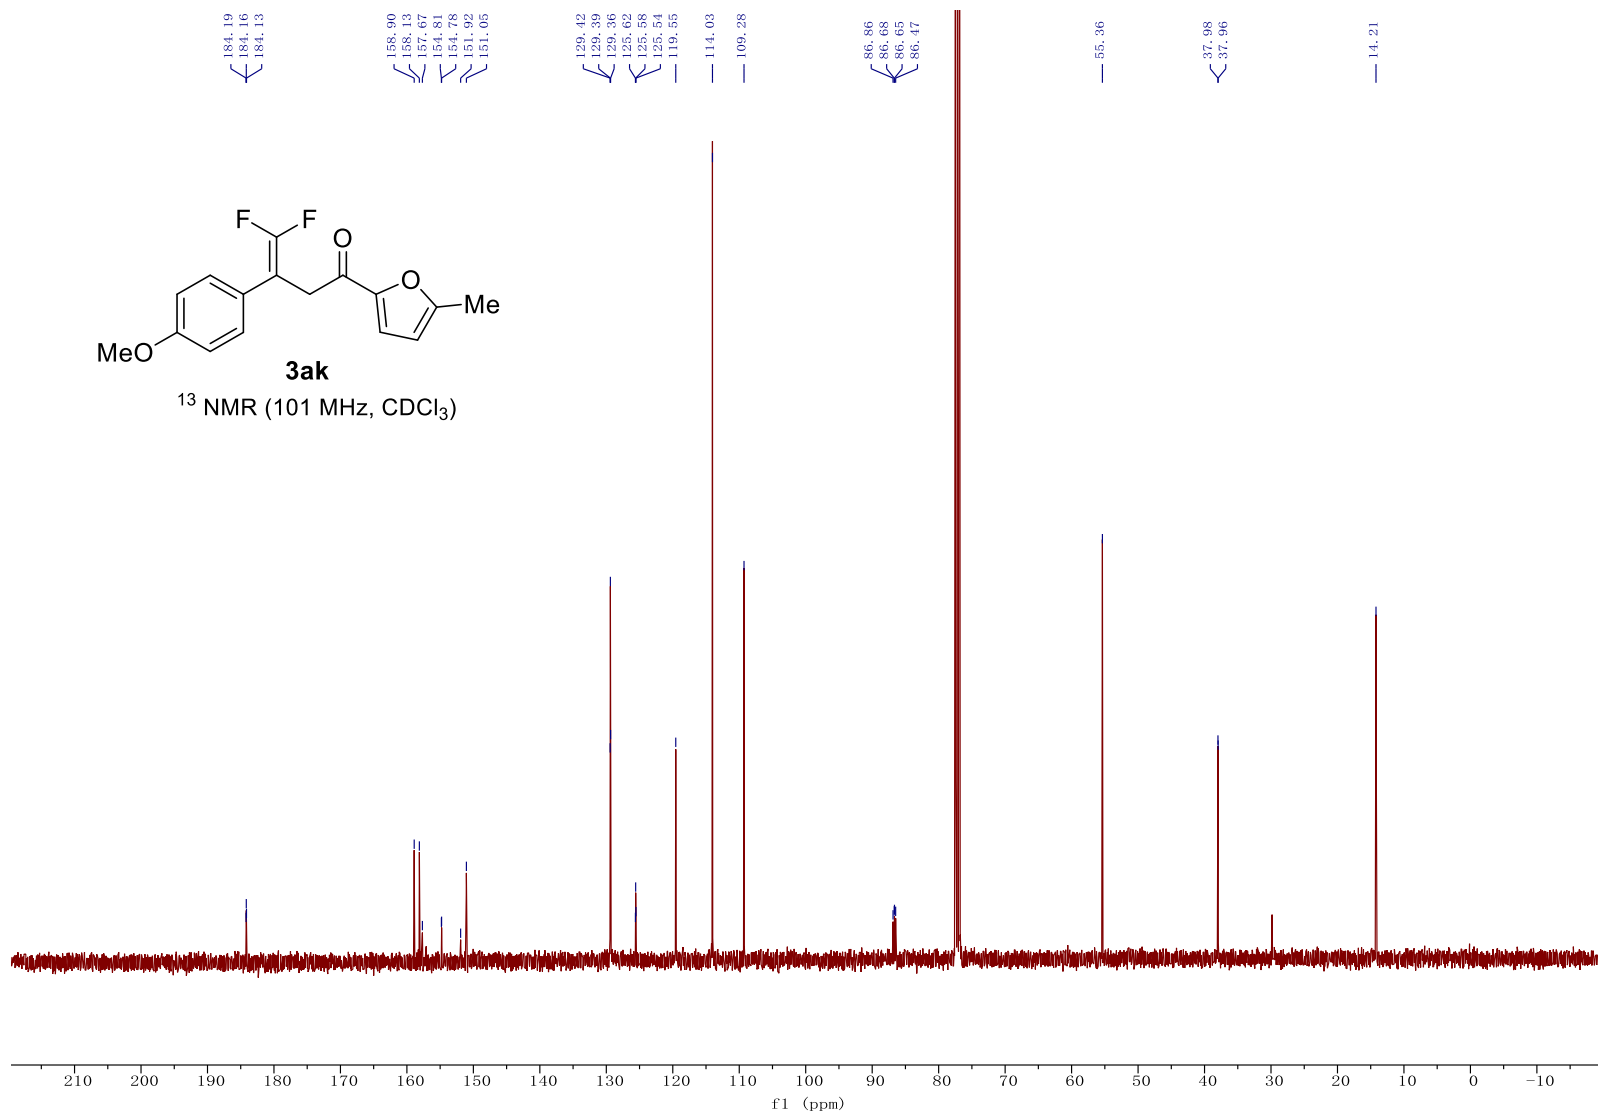

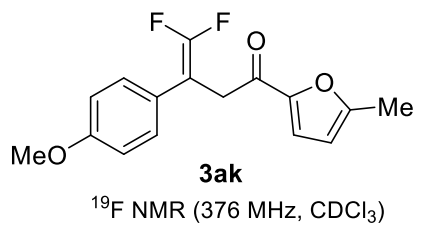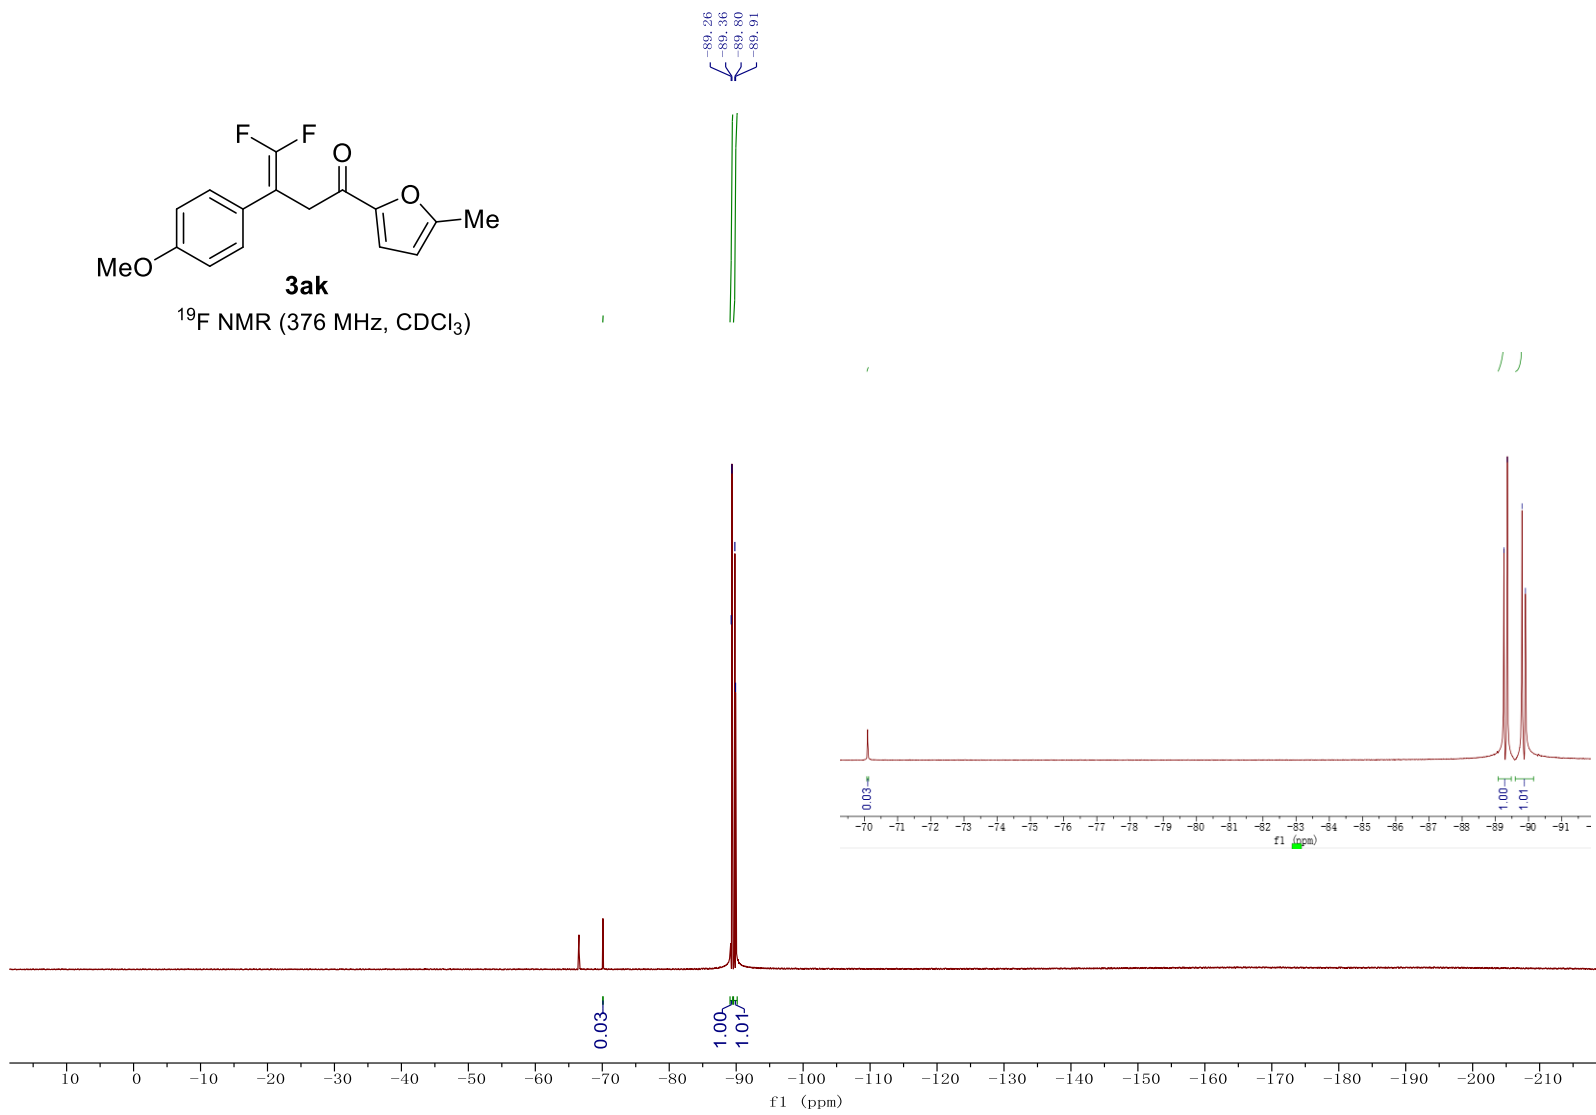



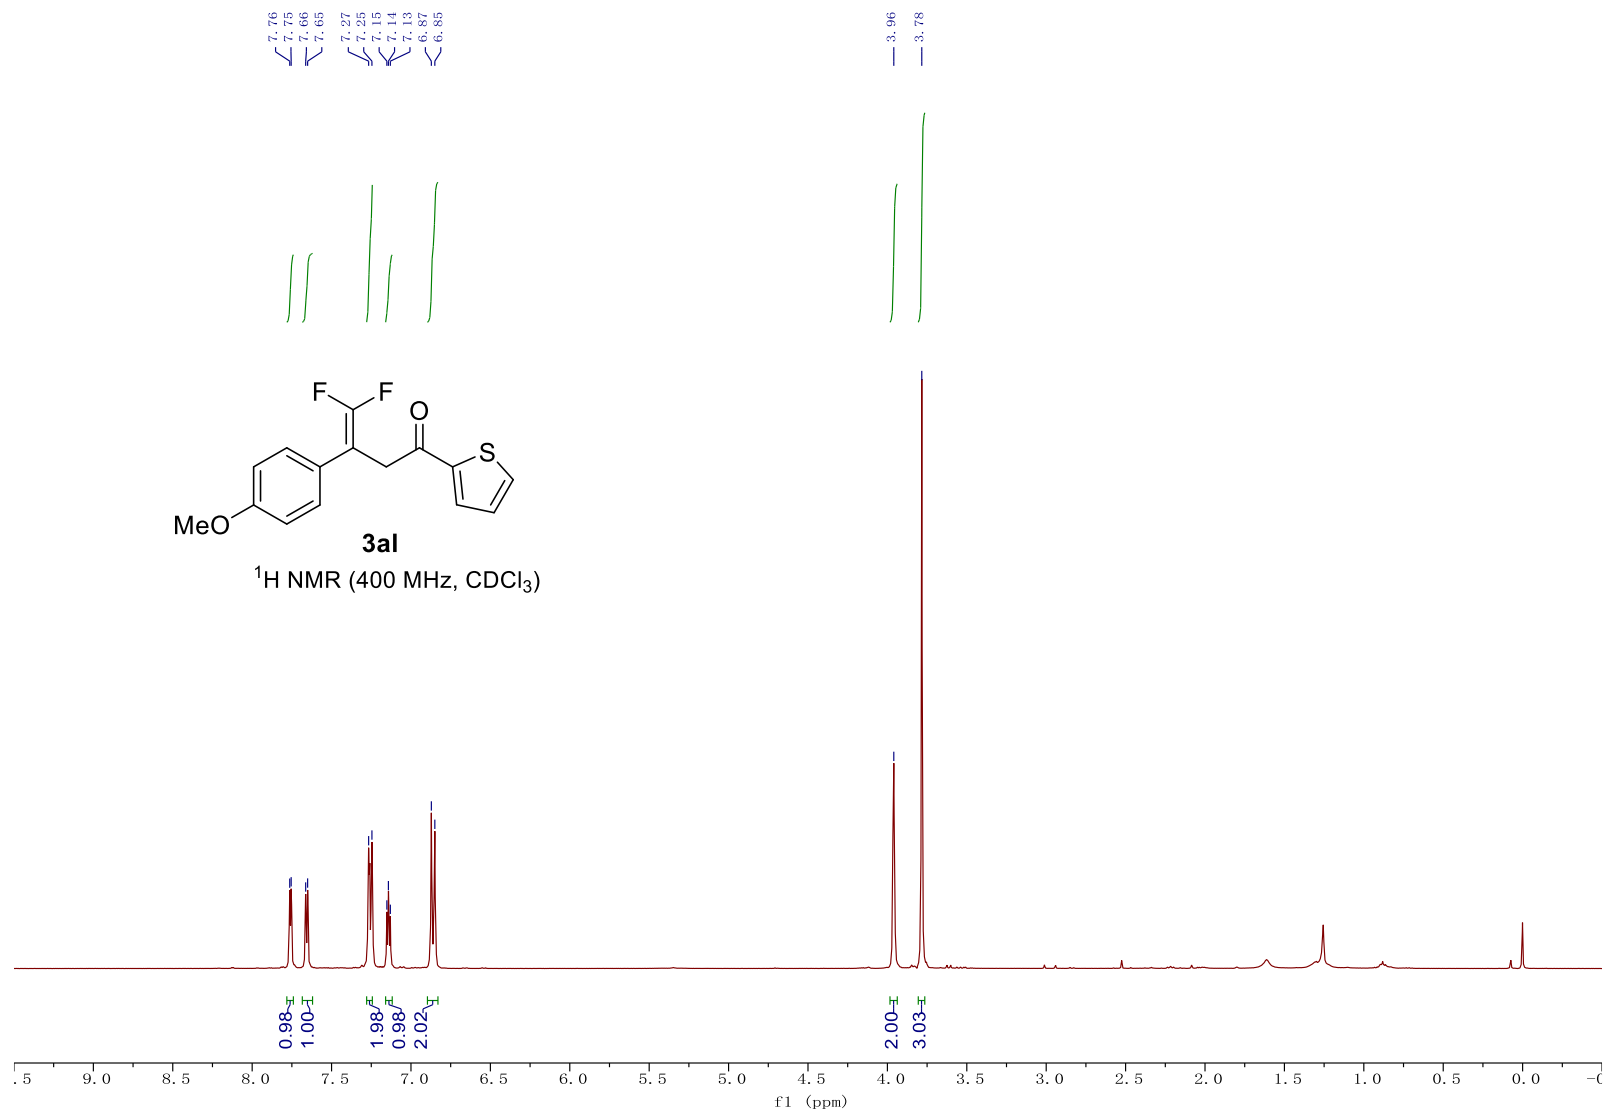

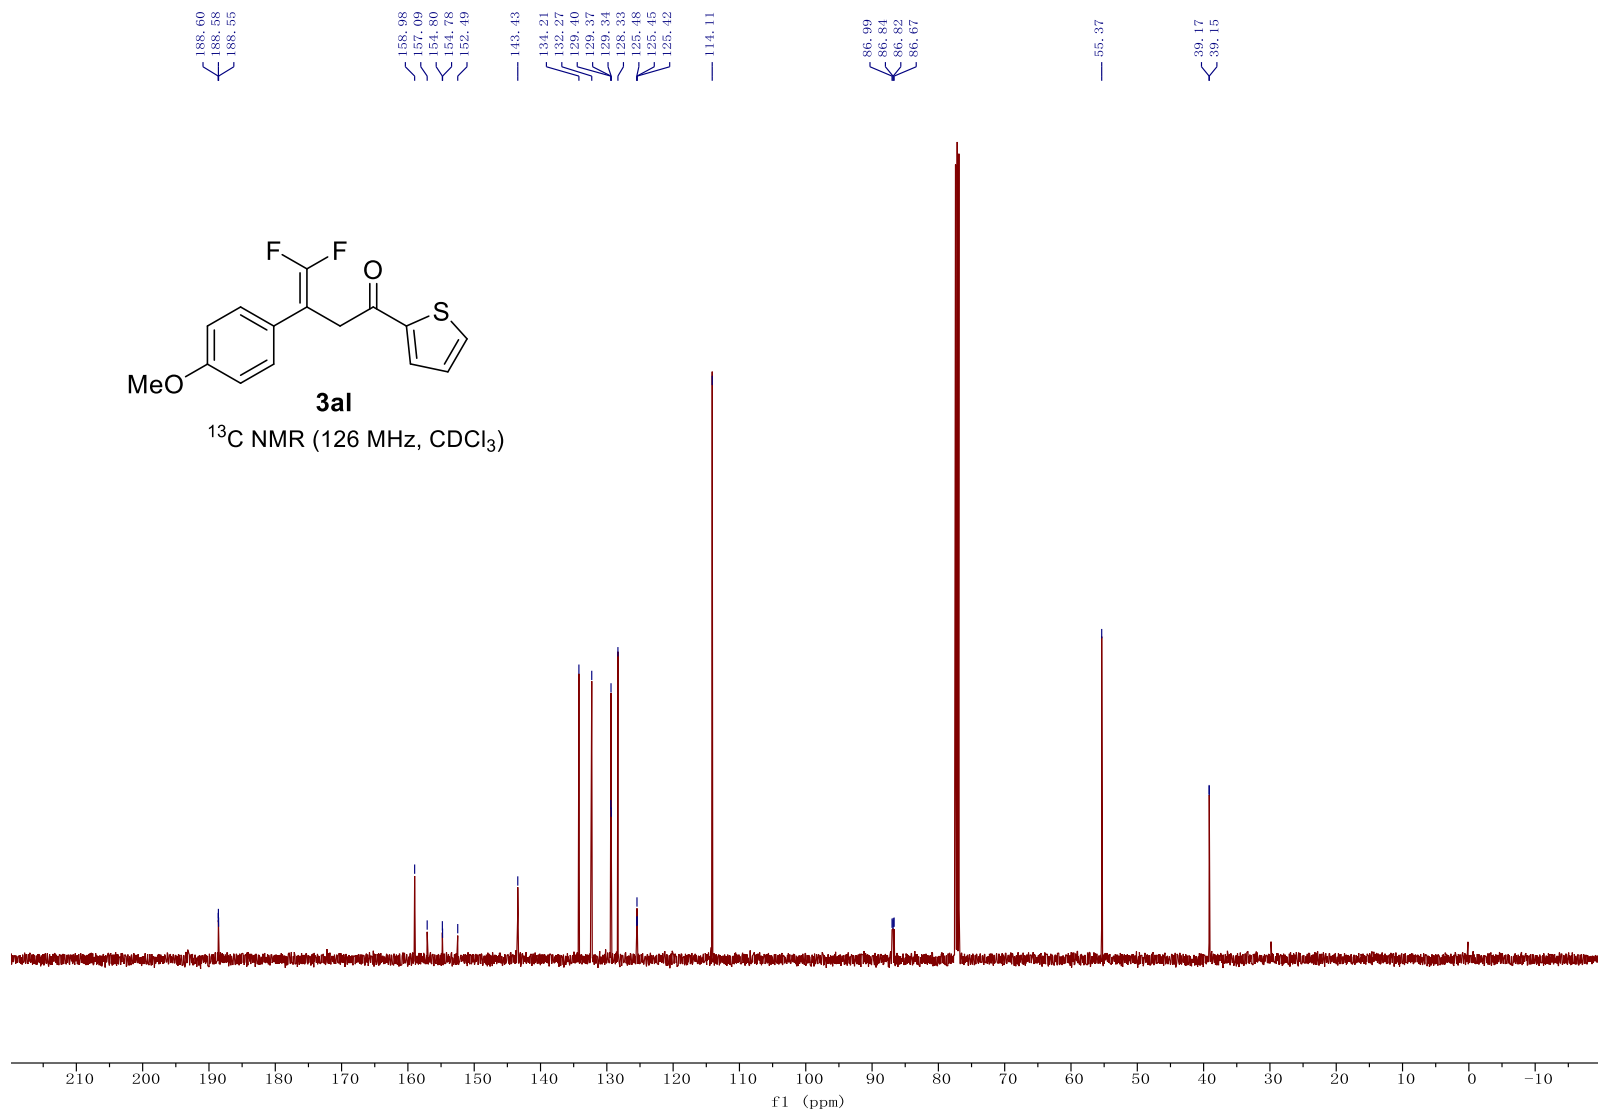

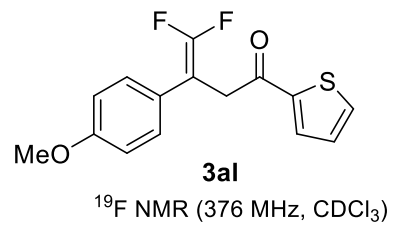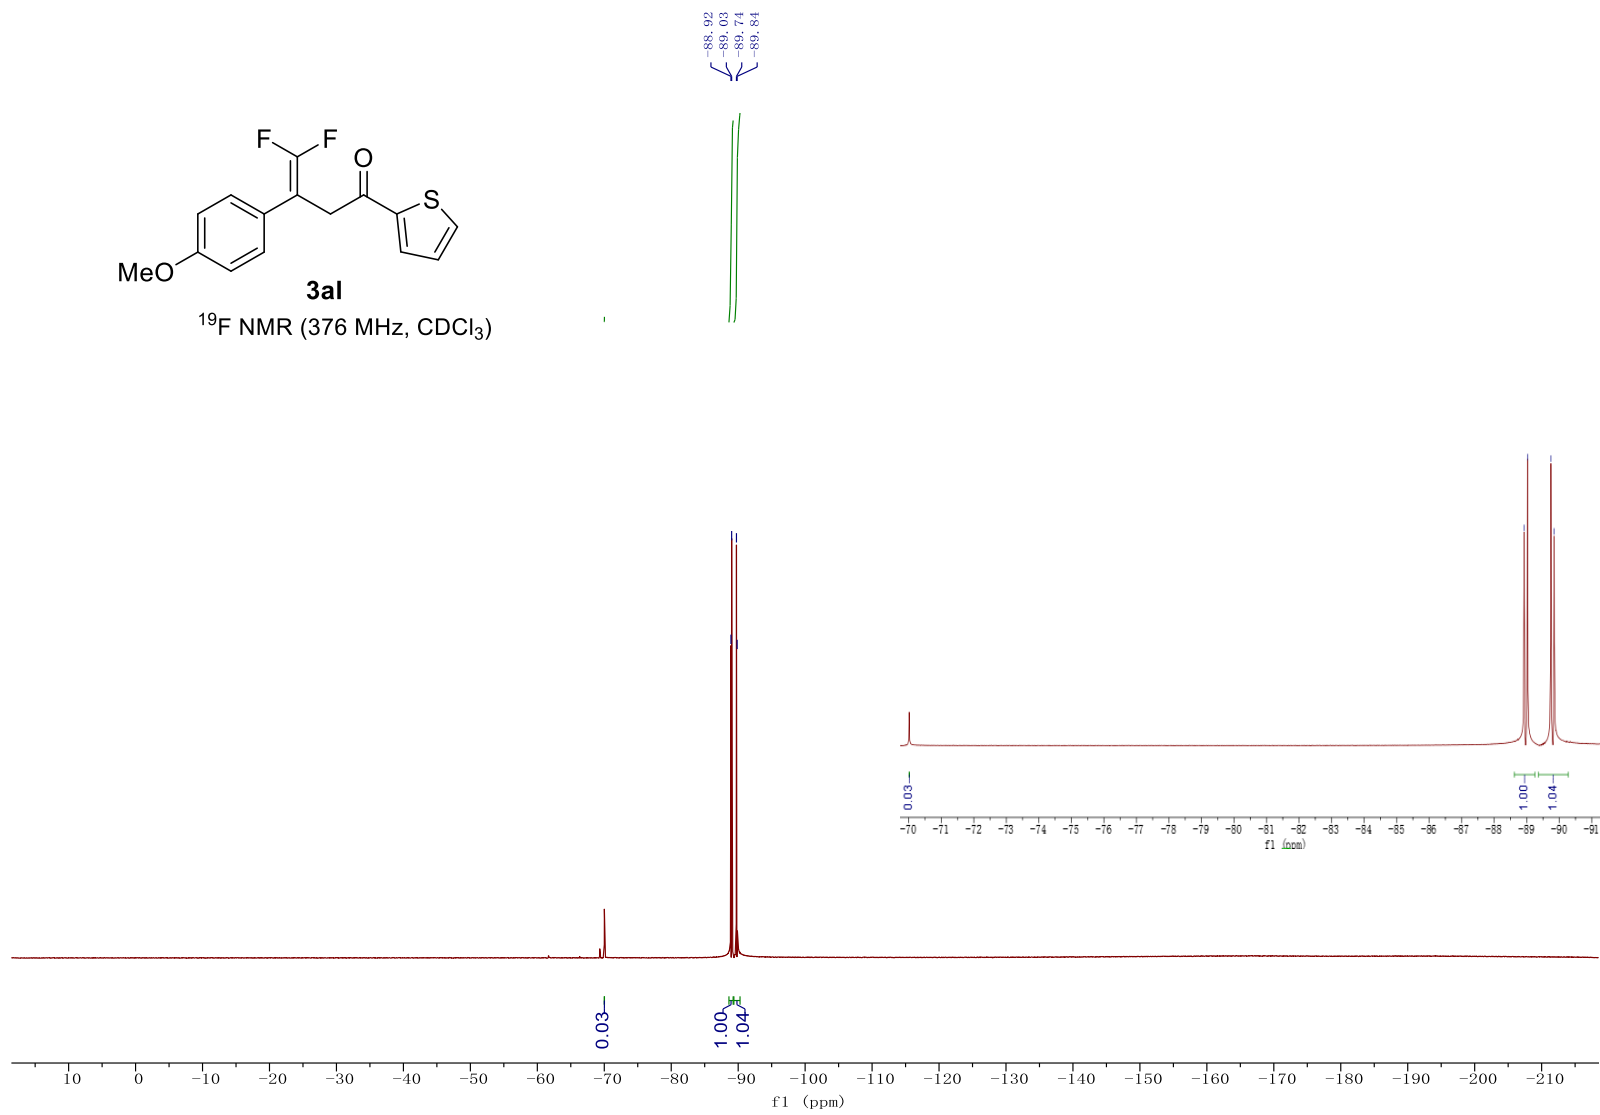

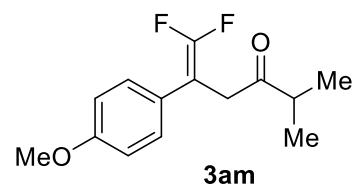

<sup>1</sup>H NMR (400 MHz, CDCl<sub>3</sub>)

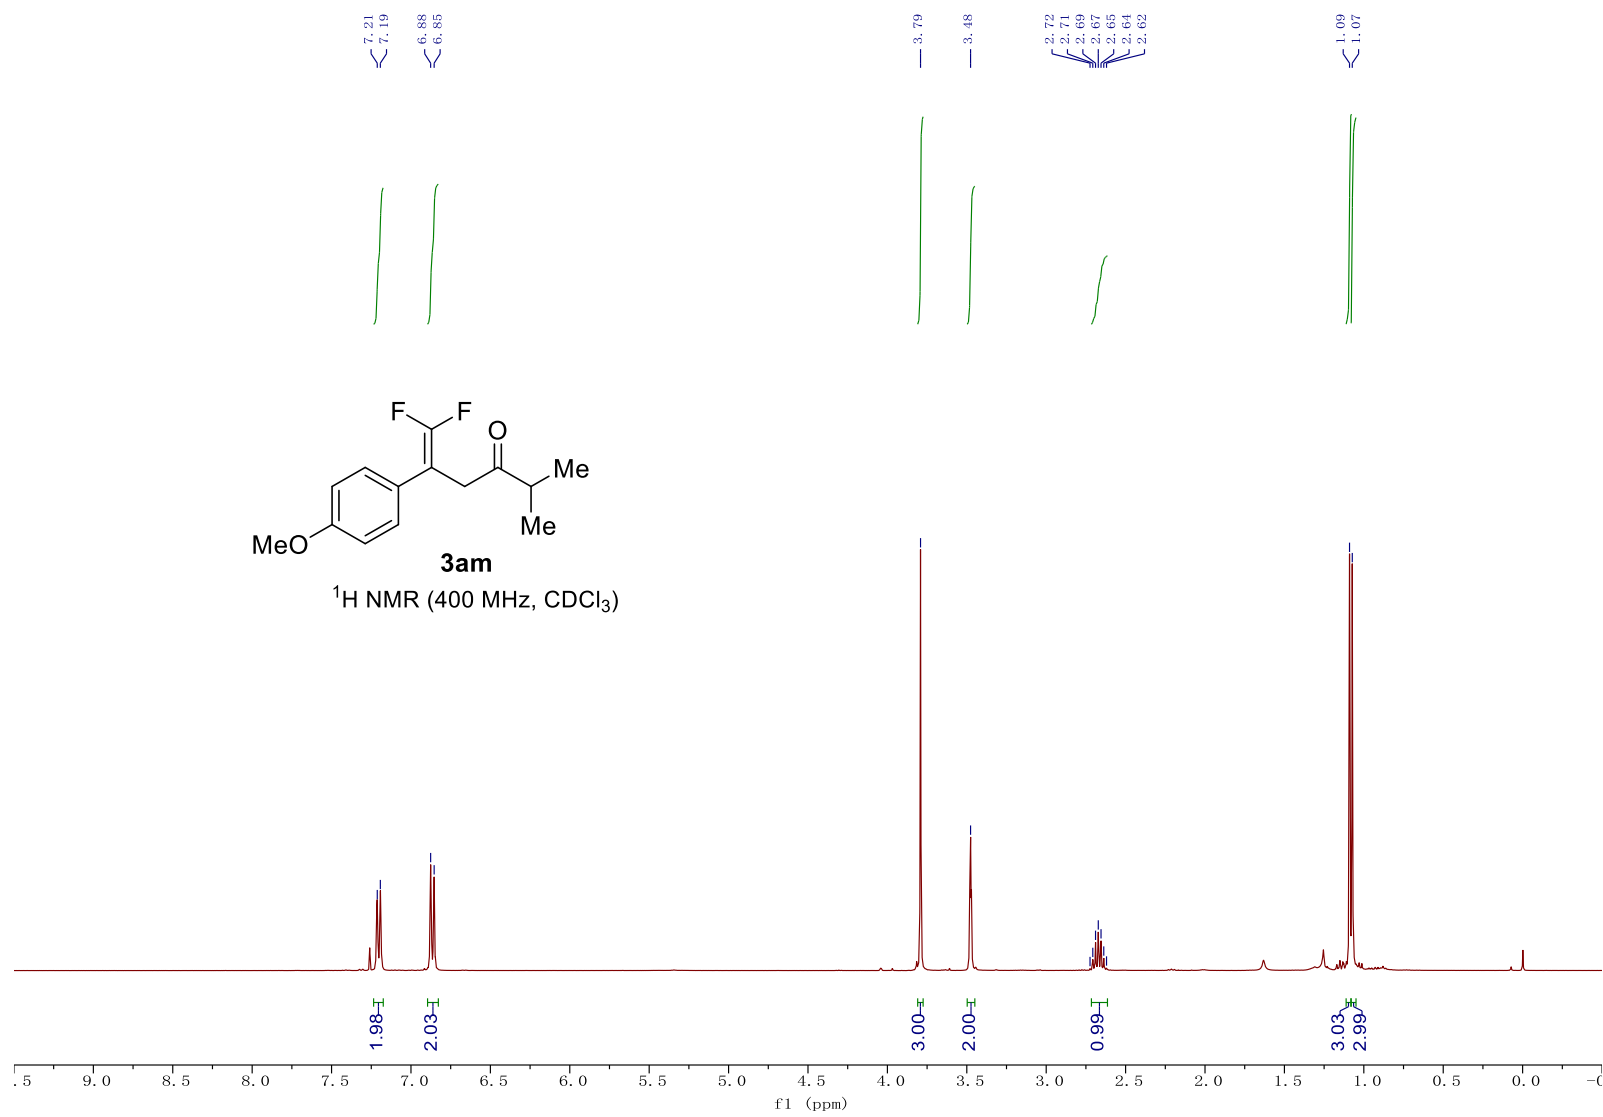

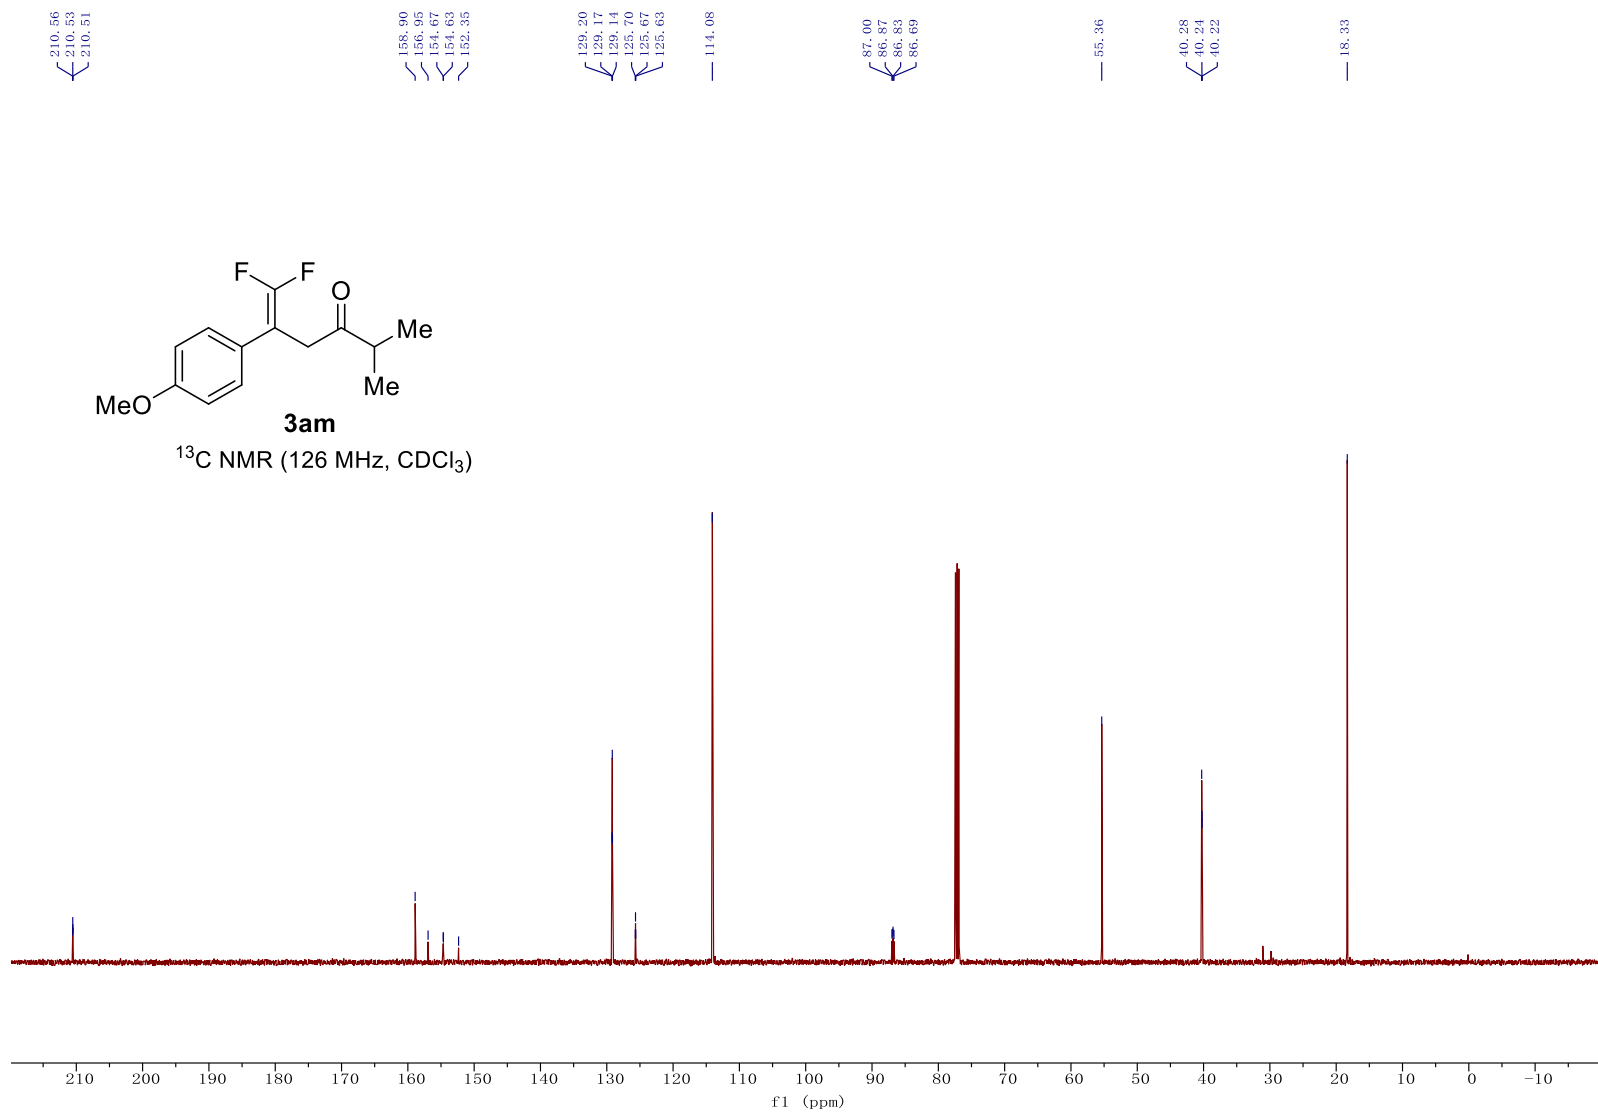

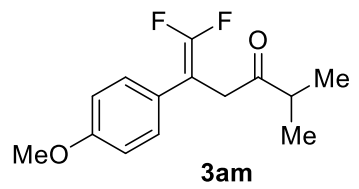

<sup>19</sup>F NMR (376 MHz, CDCl<sub>3</sub>)

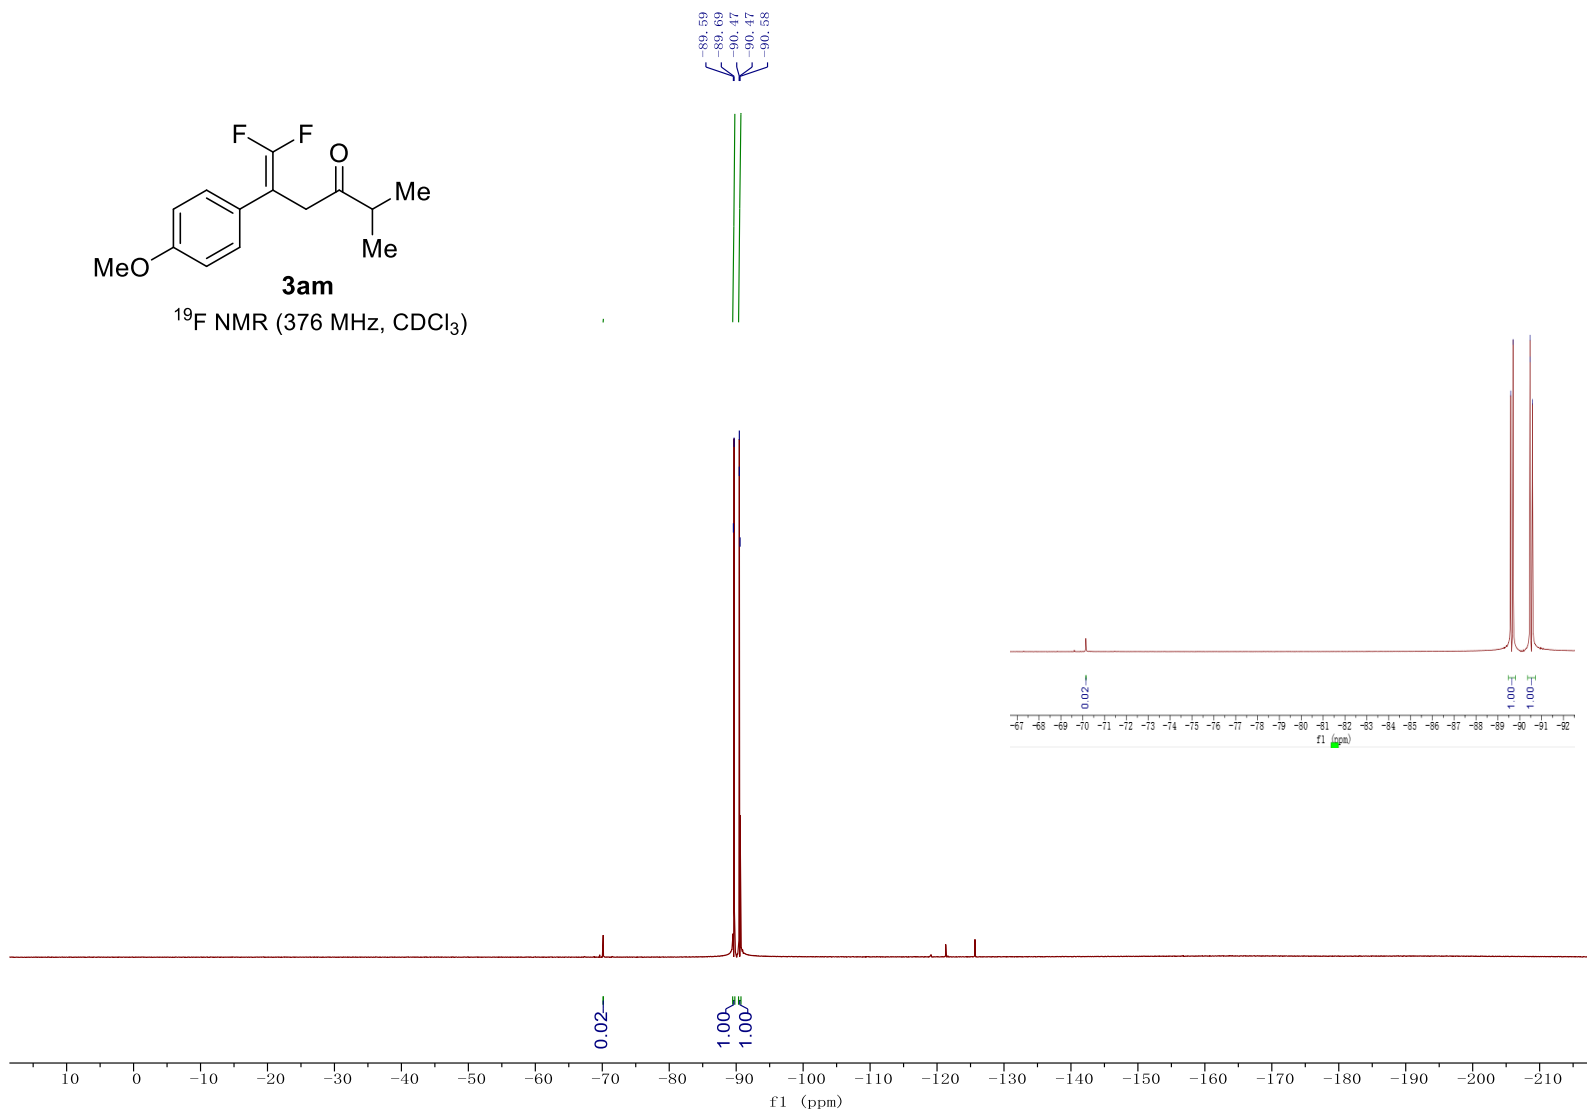

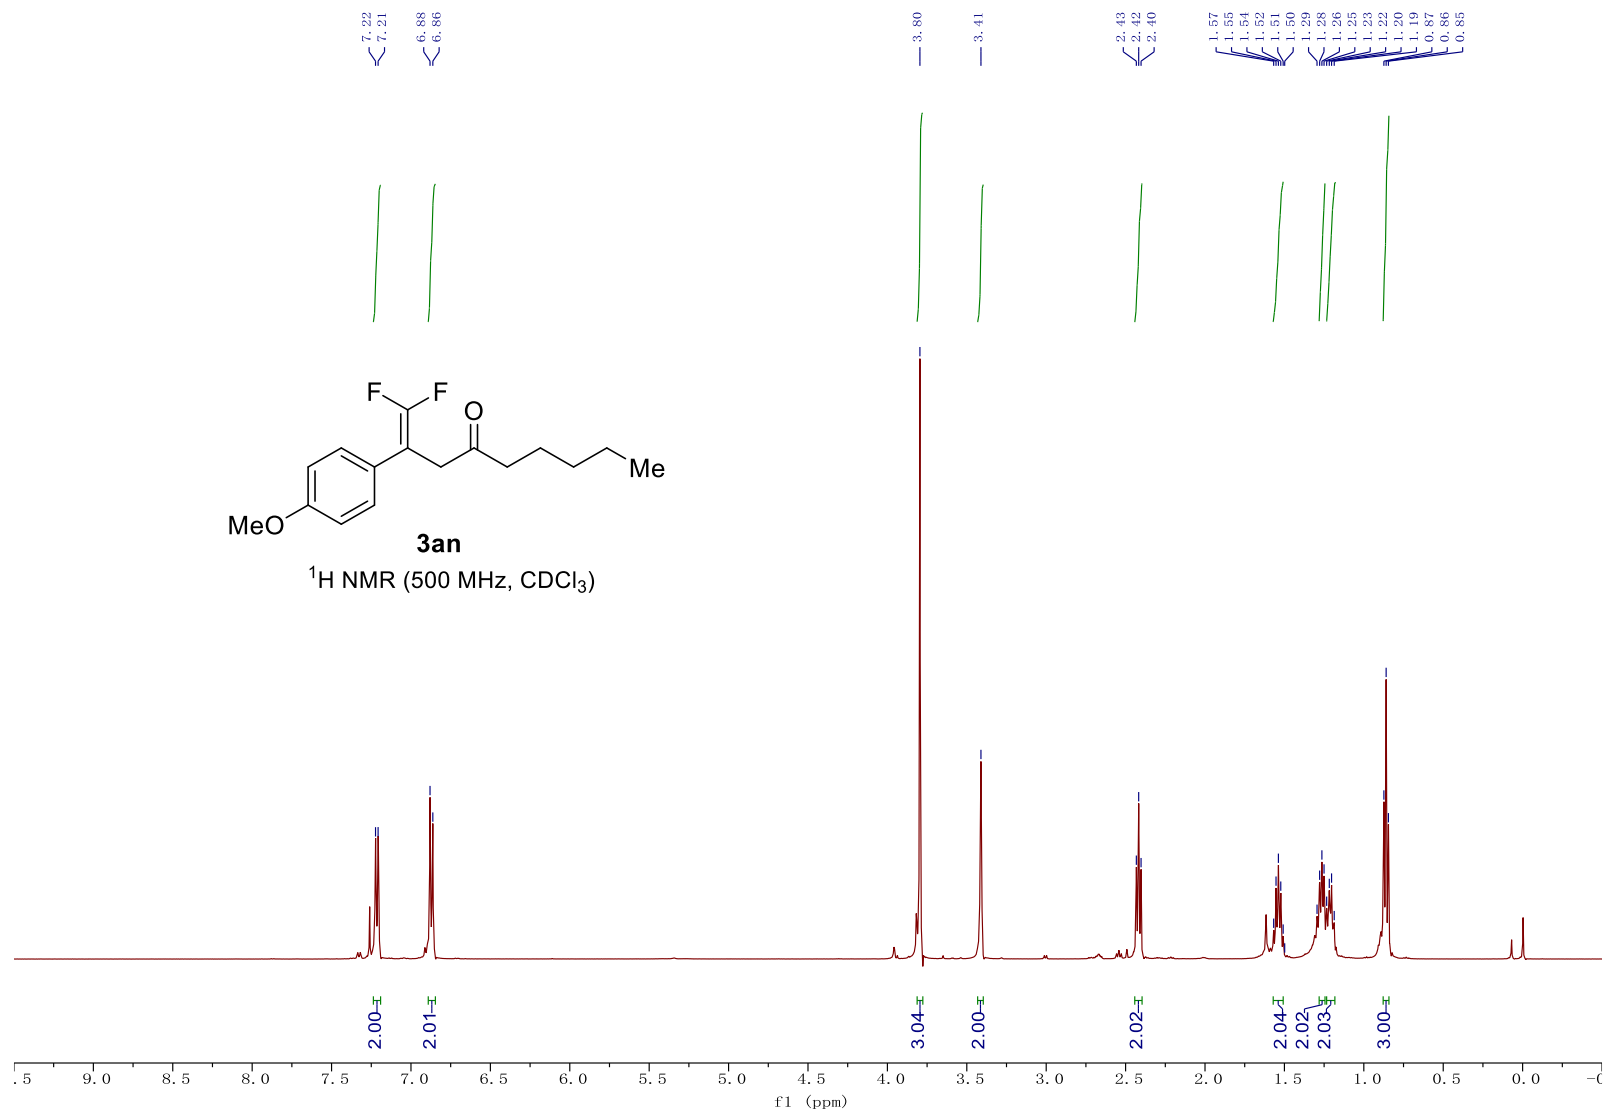

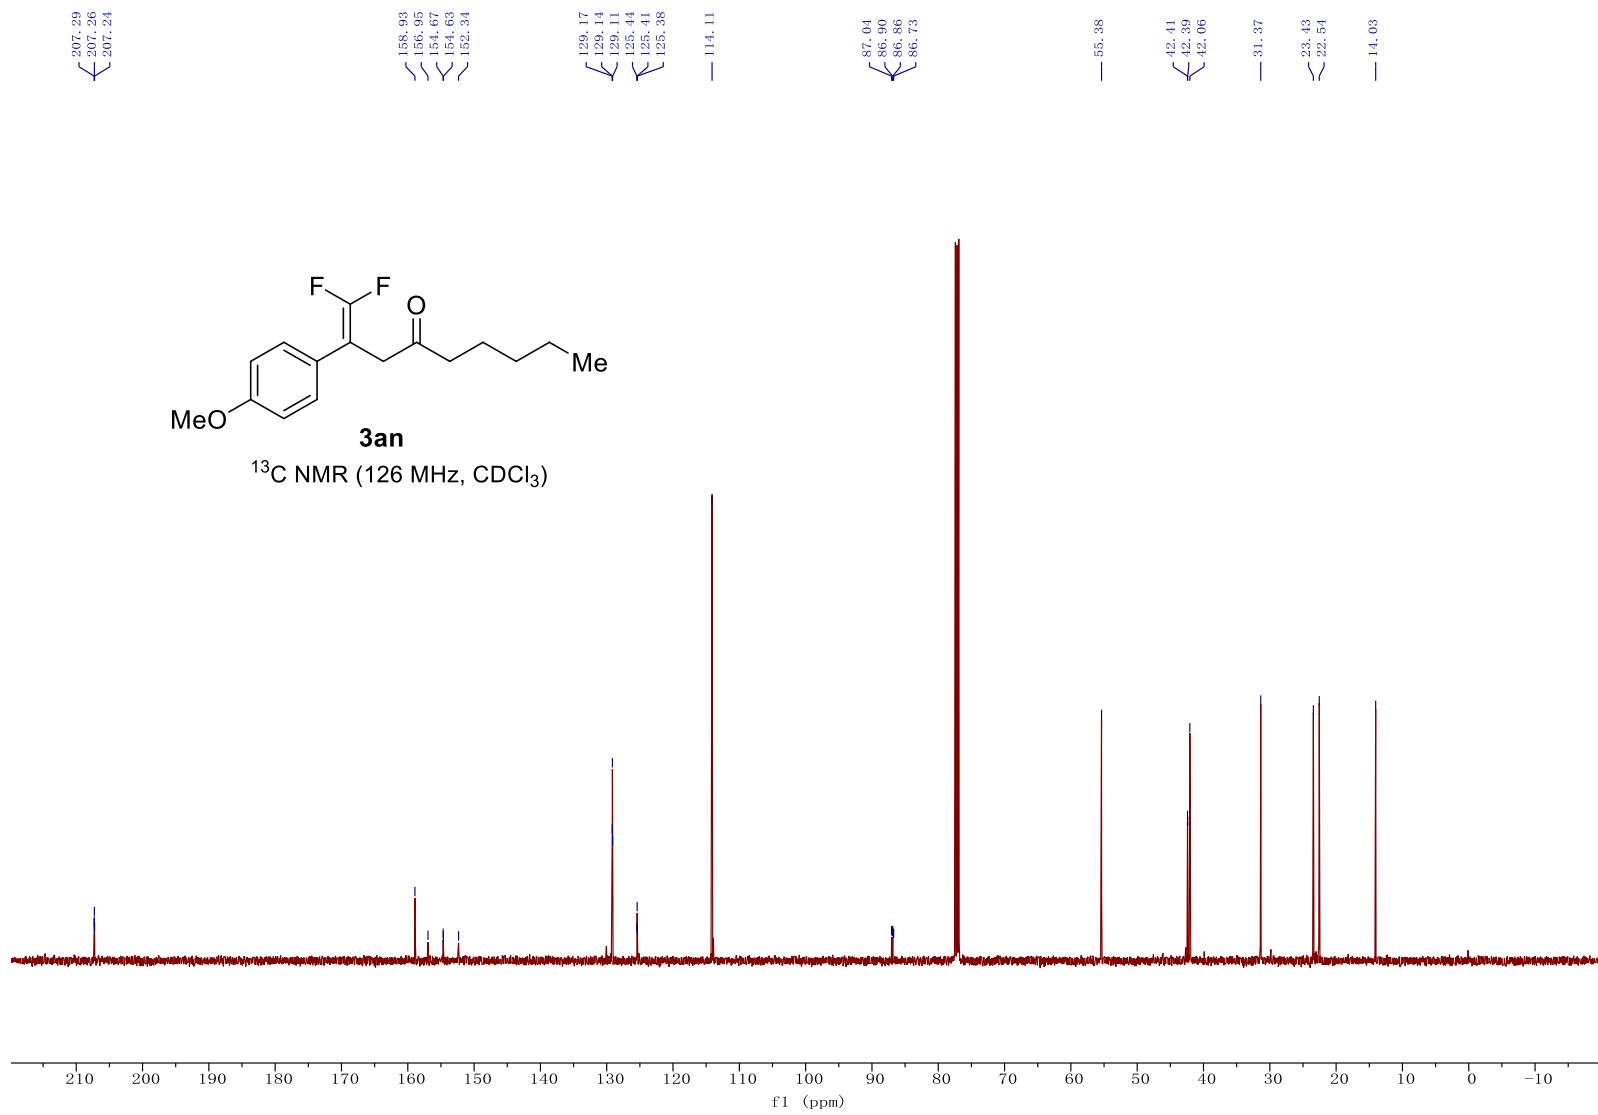



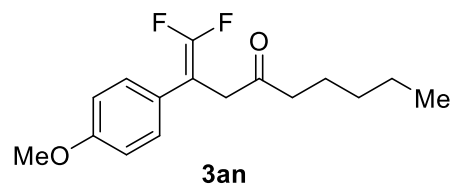

<sup>19</sup>F NMR (471 MHz, CDCl<sub>3</sub>)

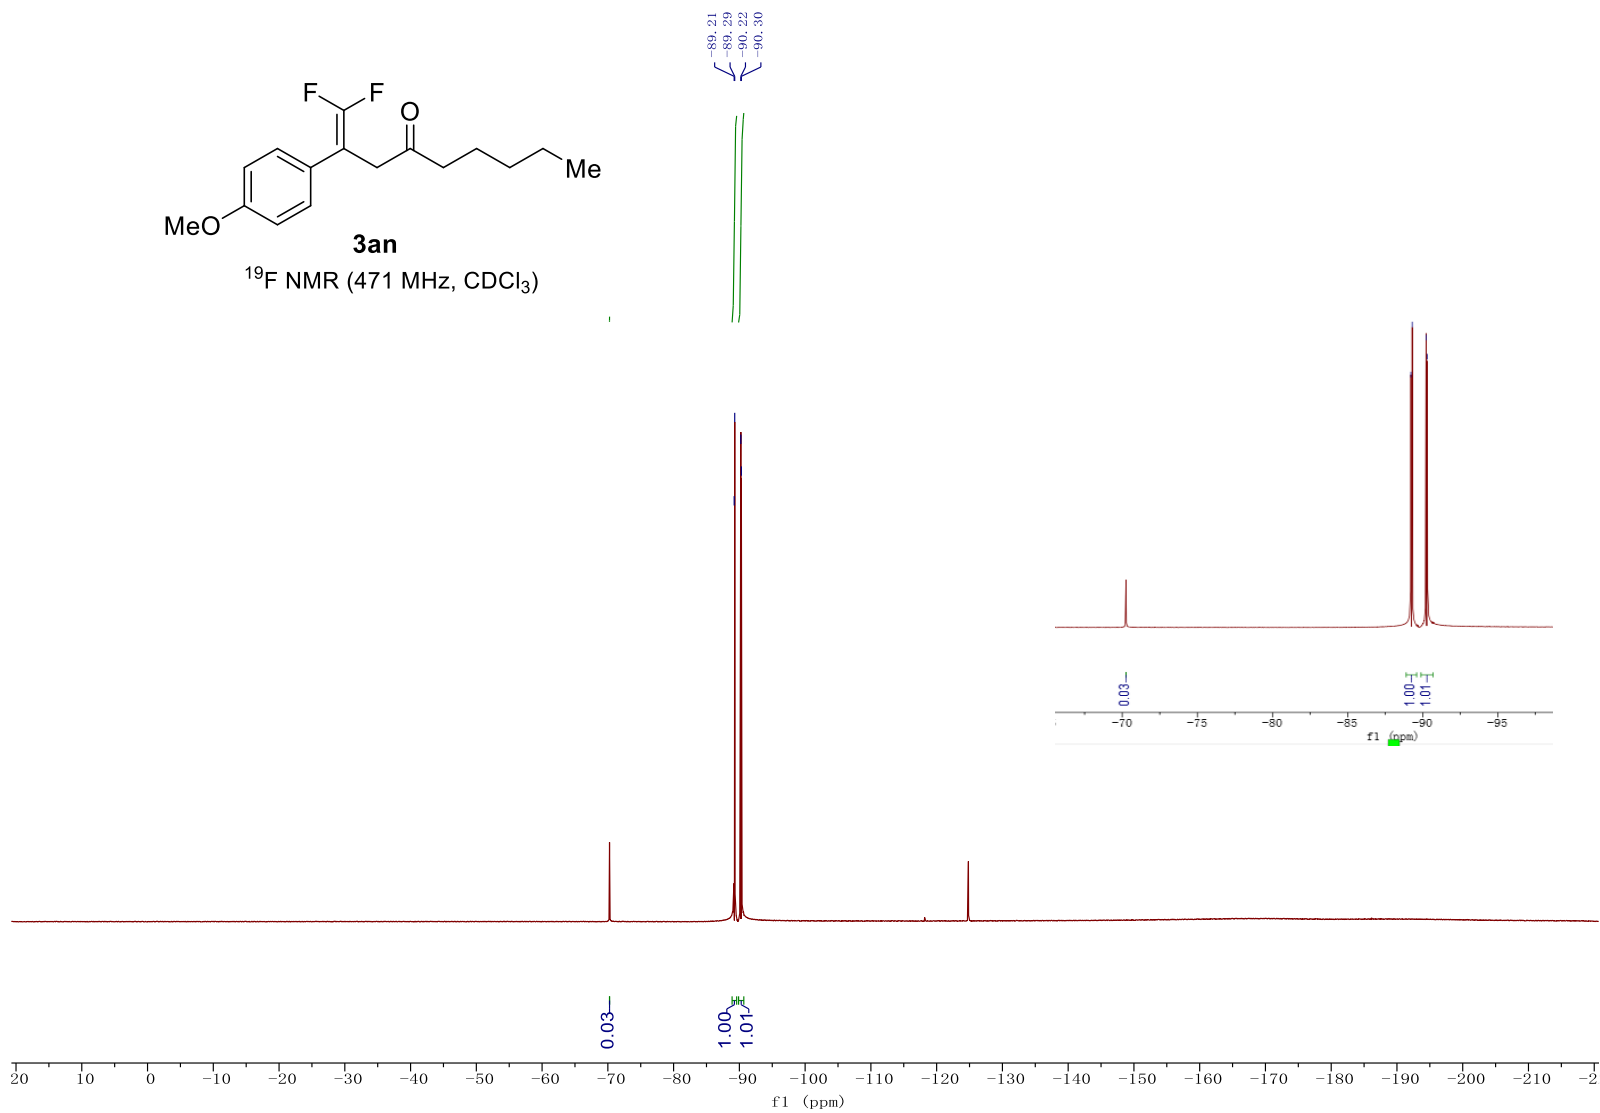

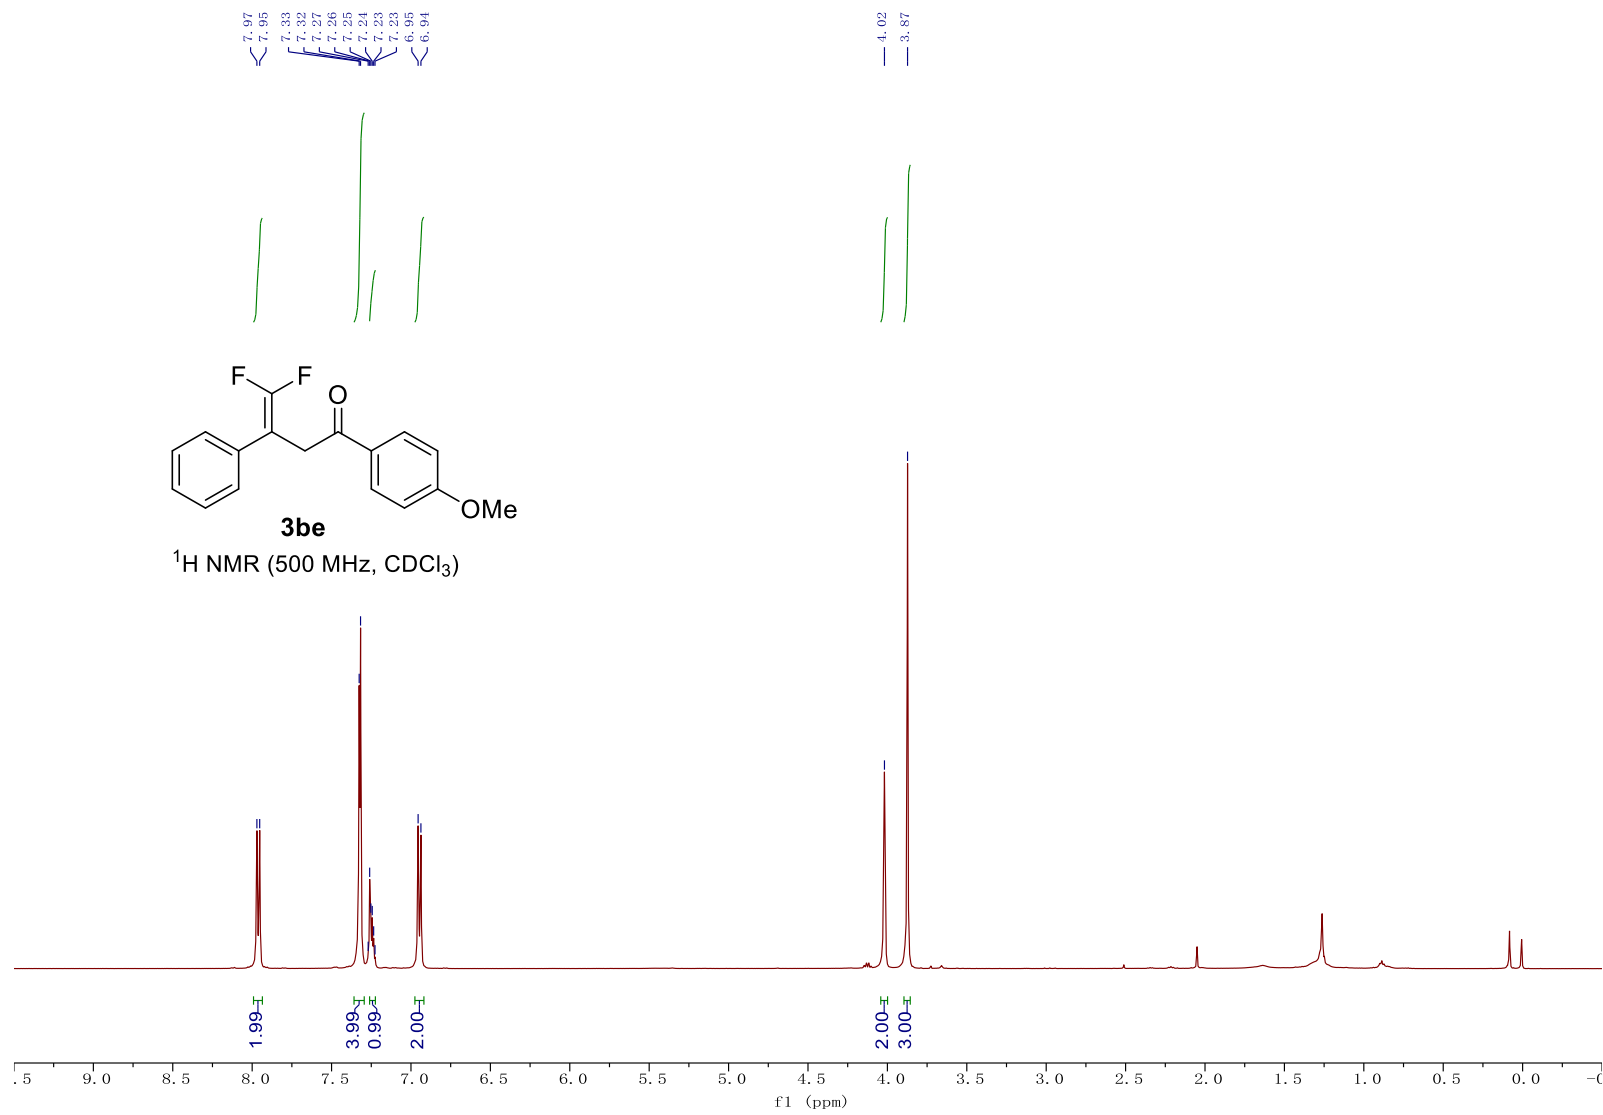

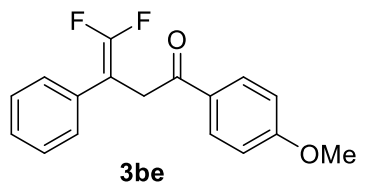

$^{13}\text{C}$  NMR (126 MHz,  $\text{CDCl}_3$ )

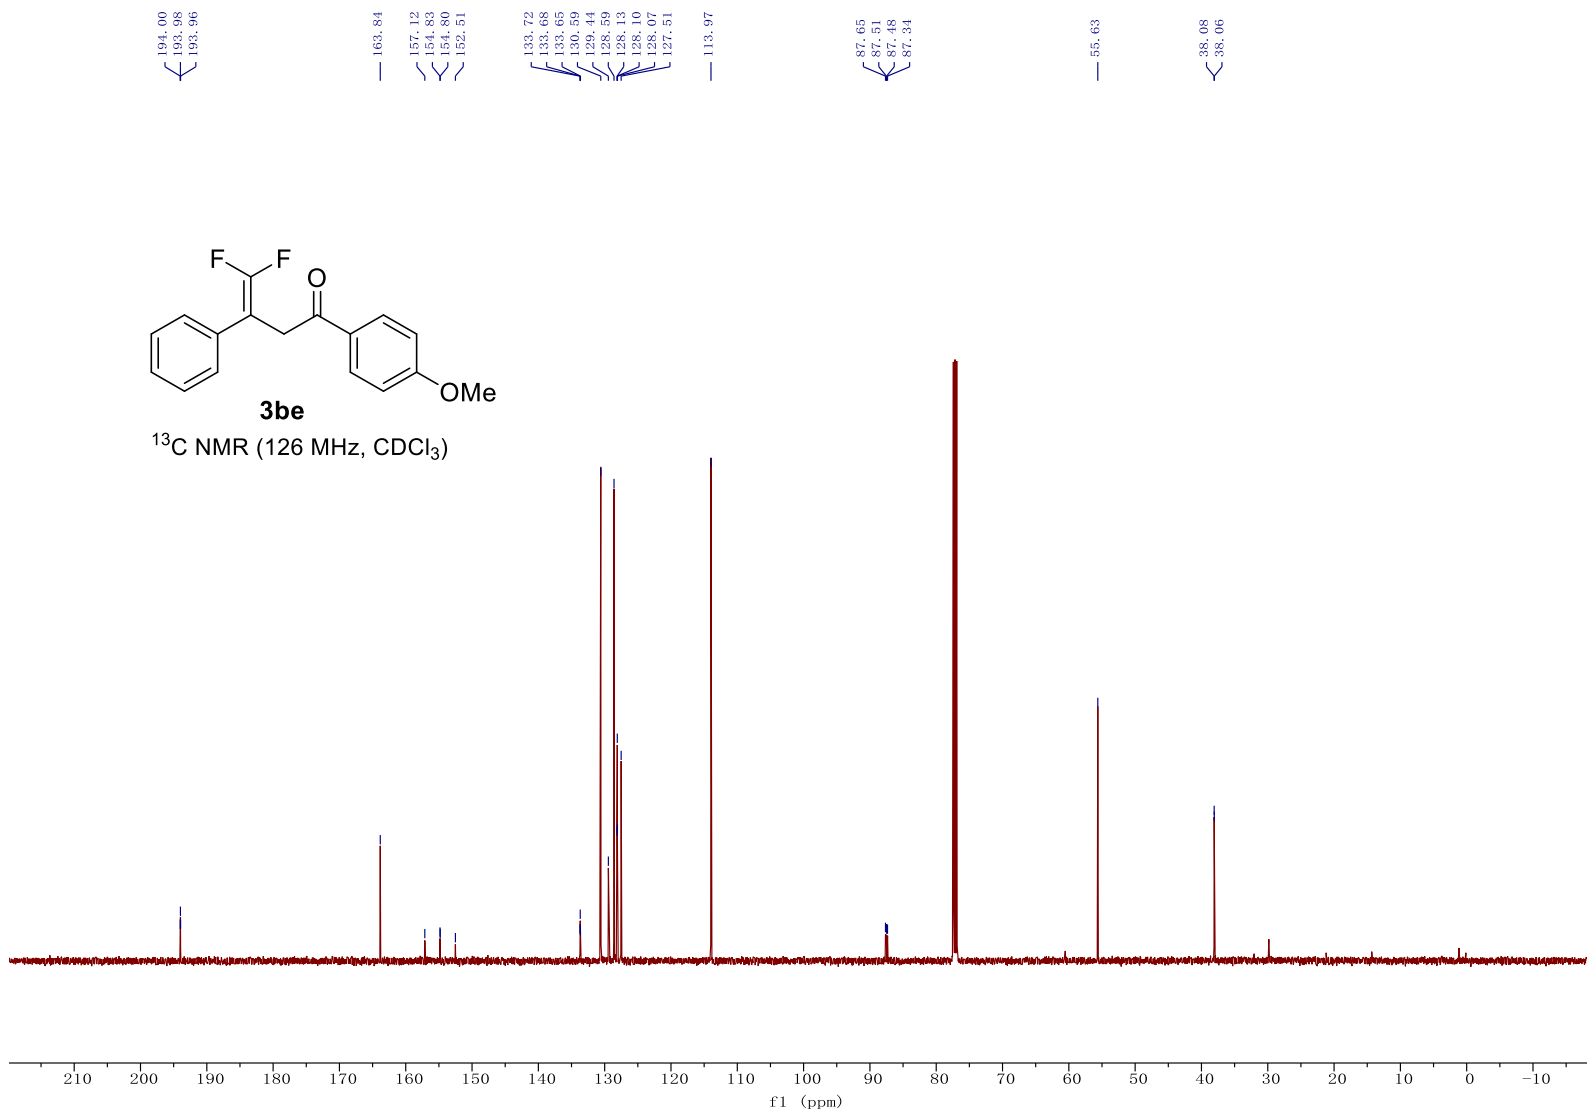

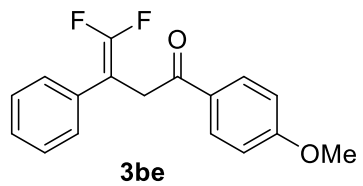

$^{19}\text{F}$  NMR (471 MHz,  $\text{CDCl}_3$ )

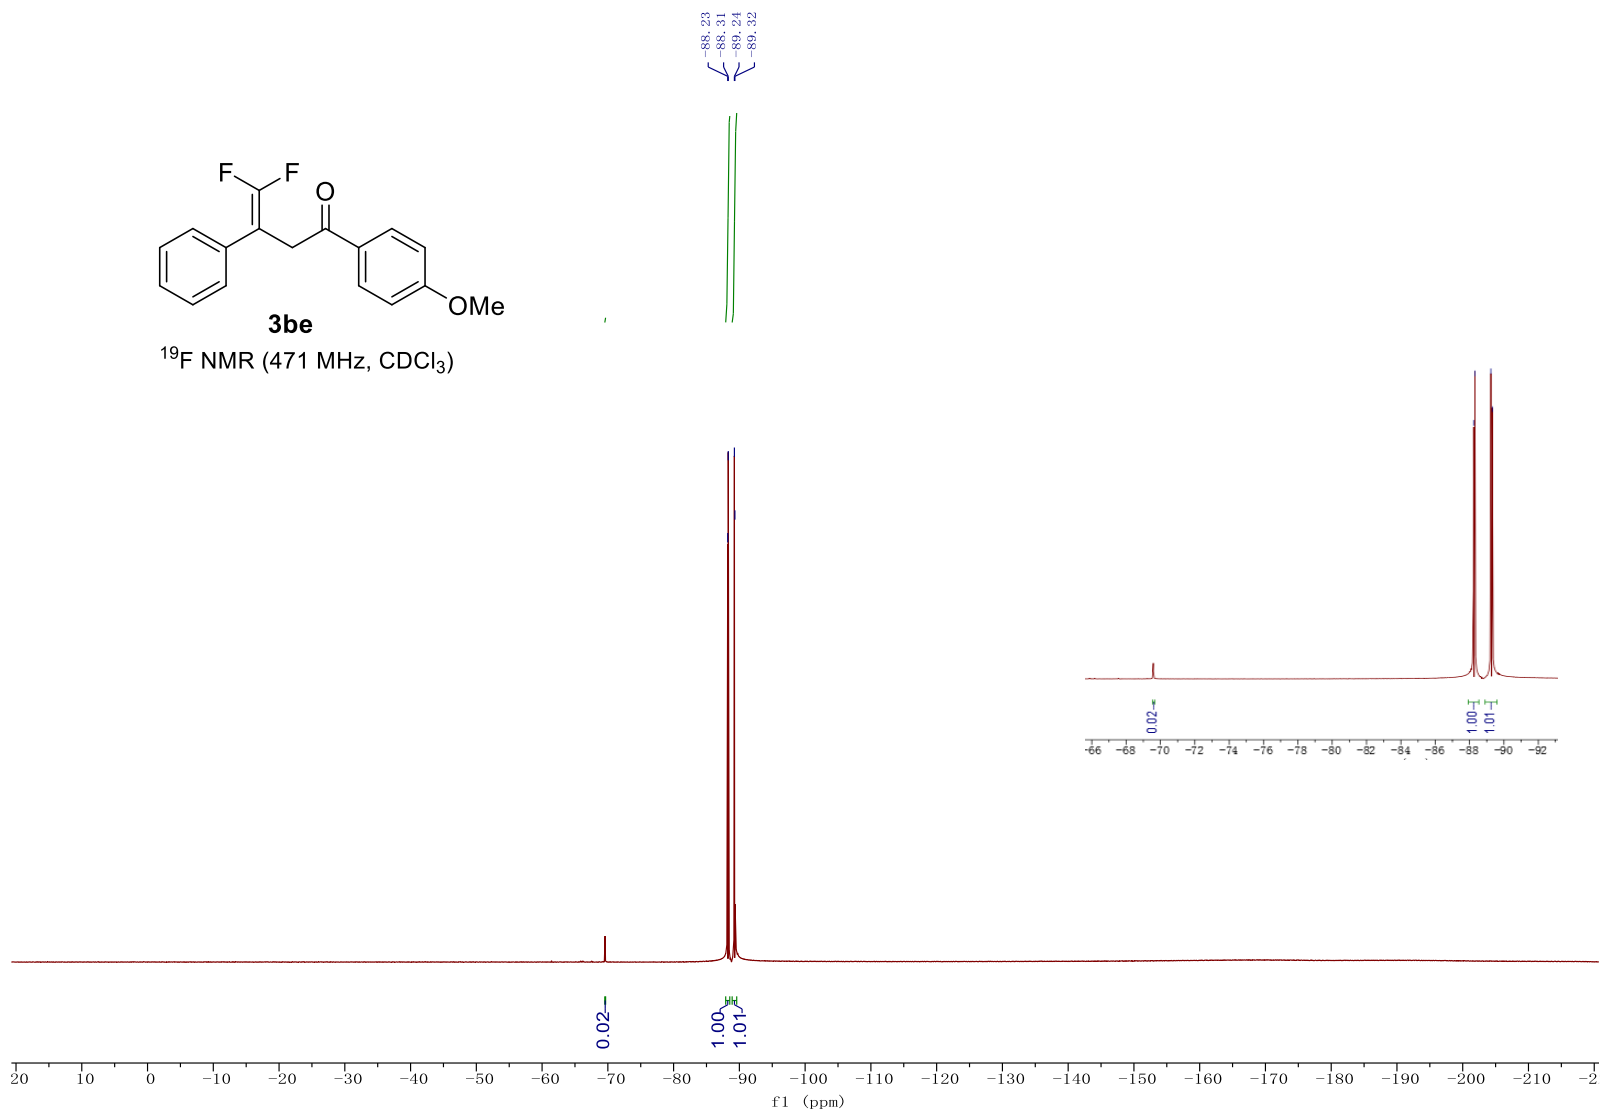

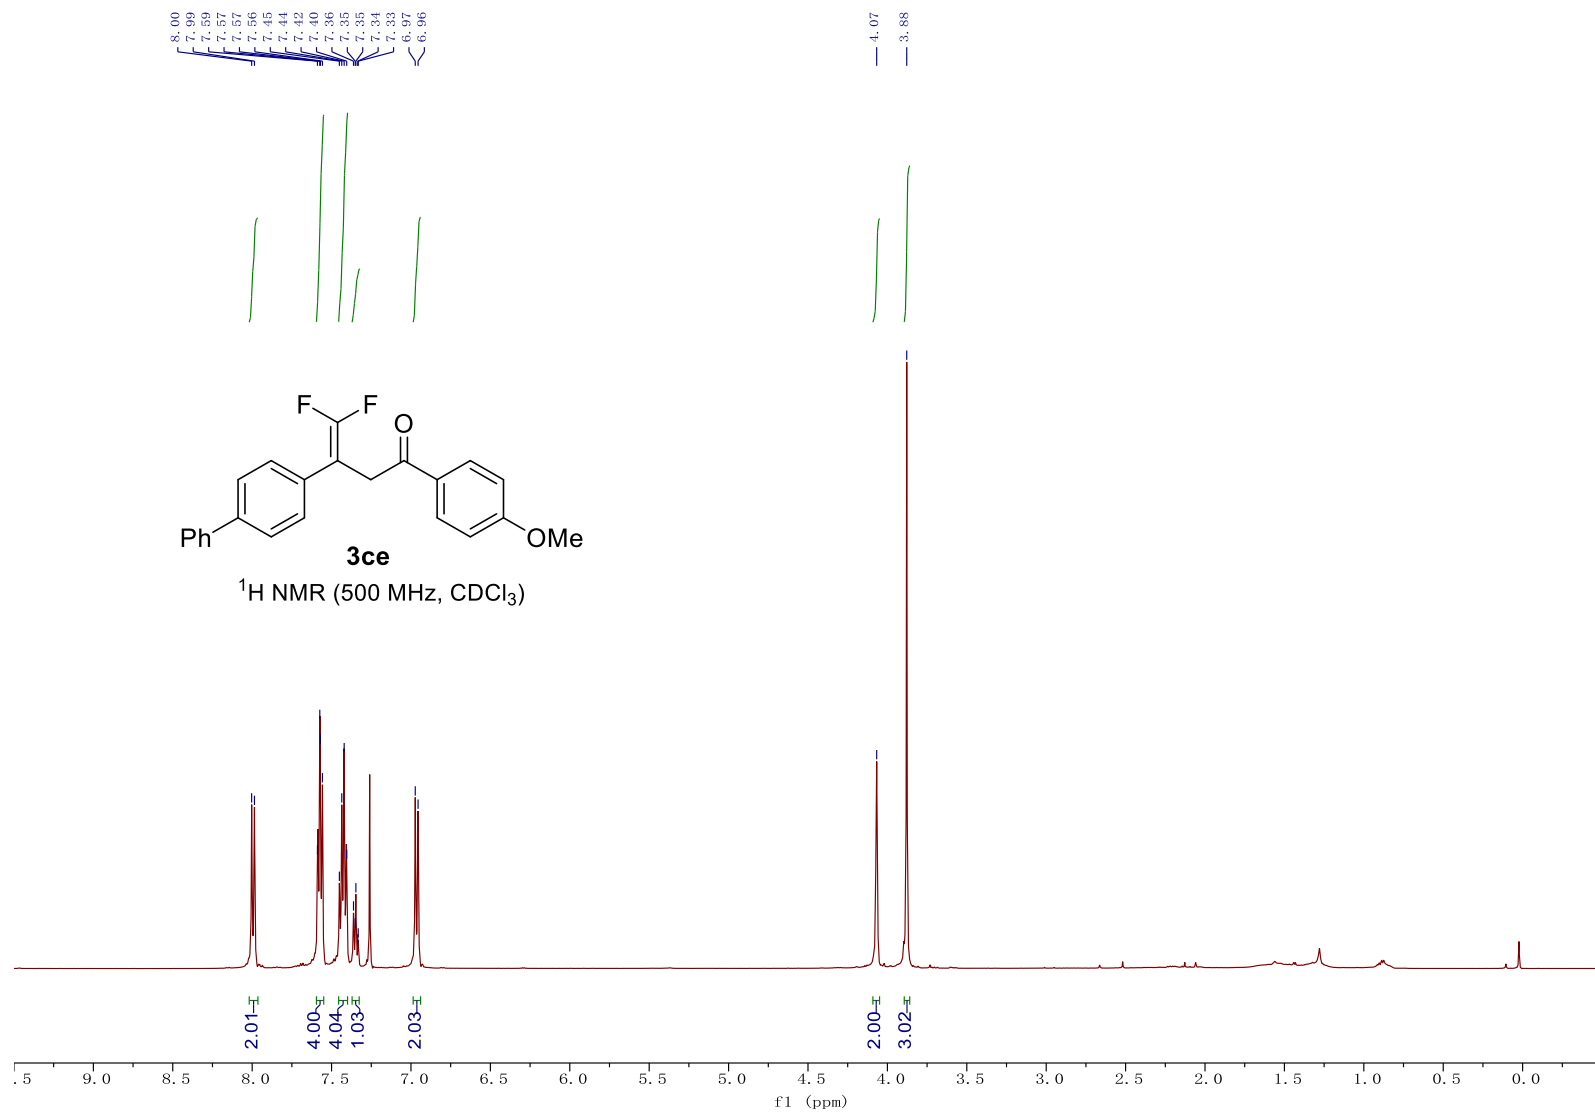

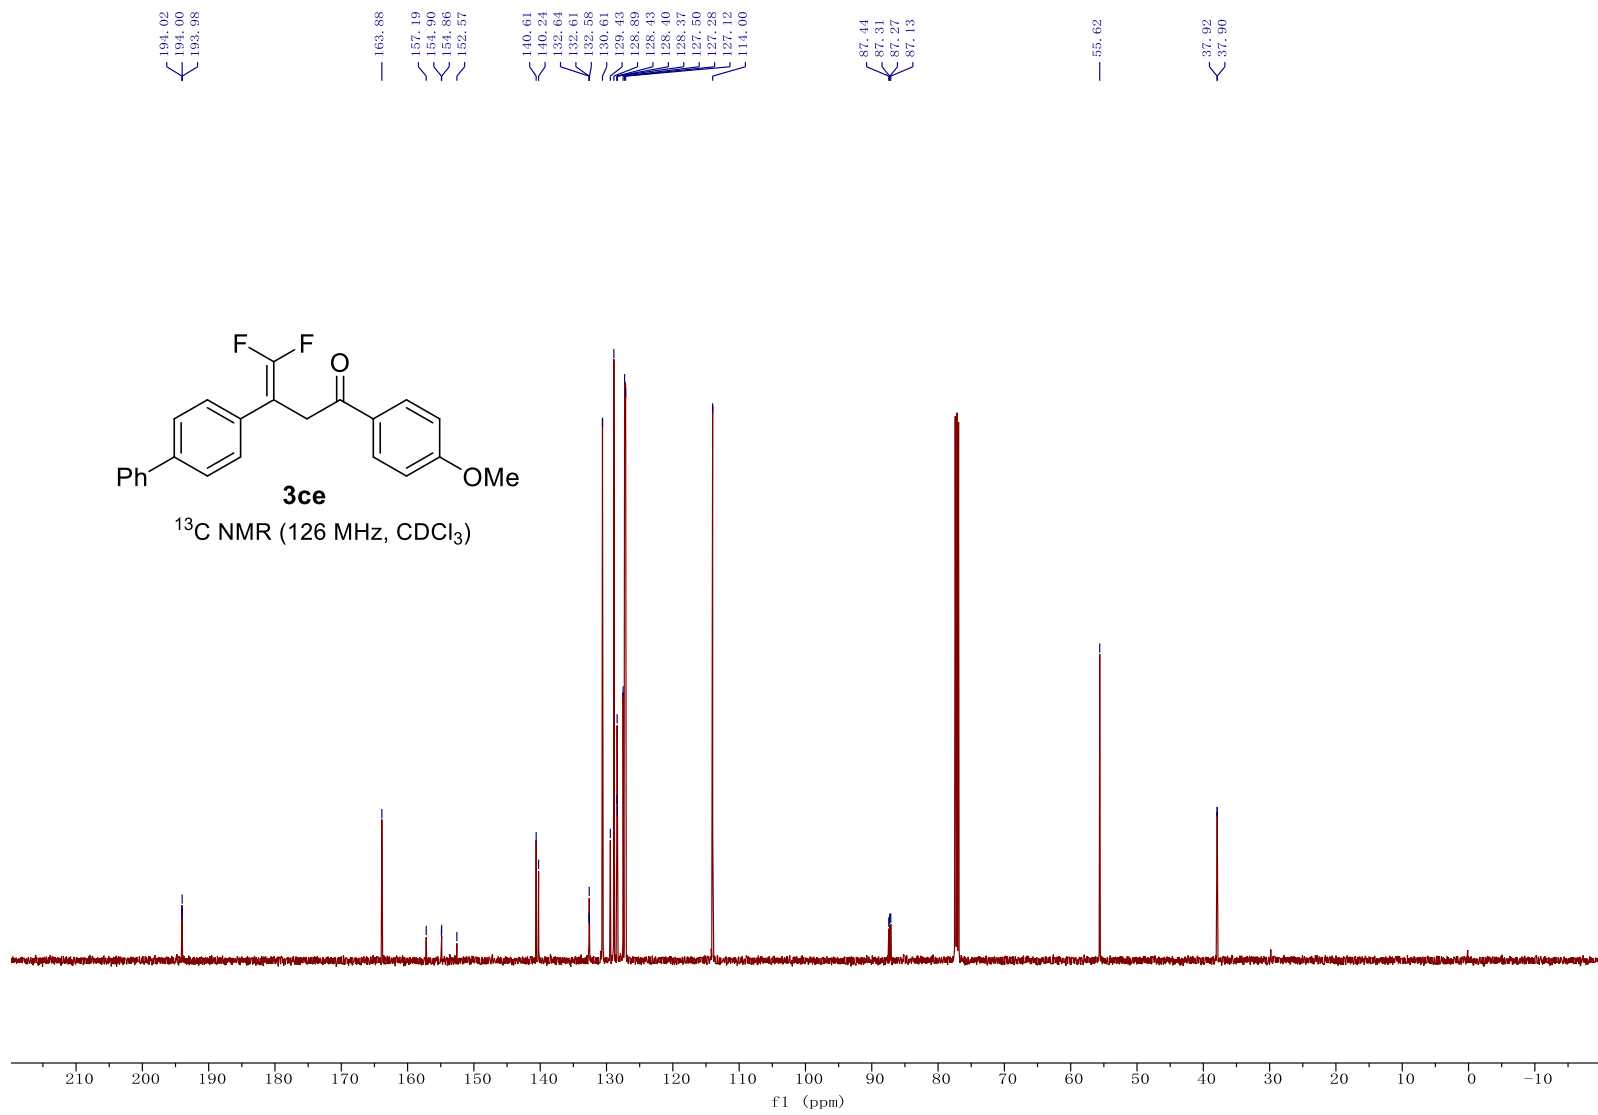

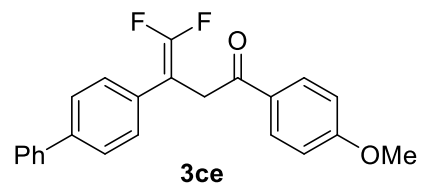

<sup>19</sup>F NMR (471 MHz, CDCl<sub>3</sub>)

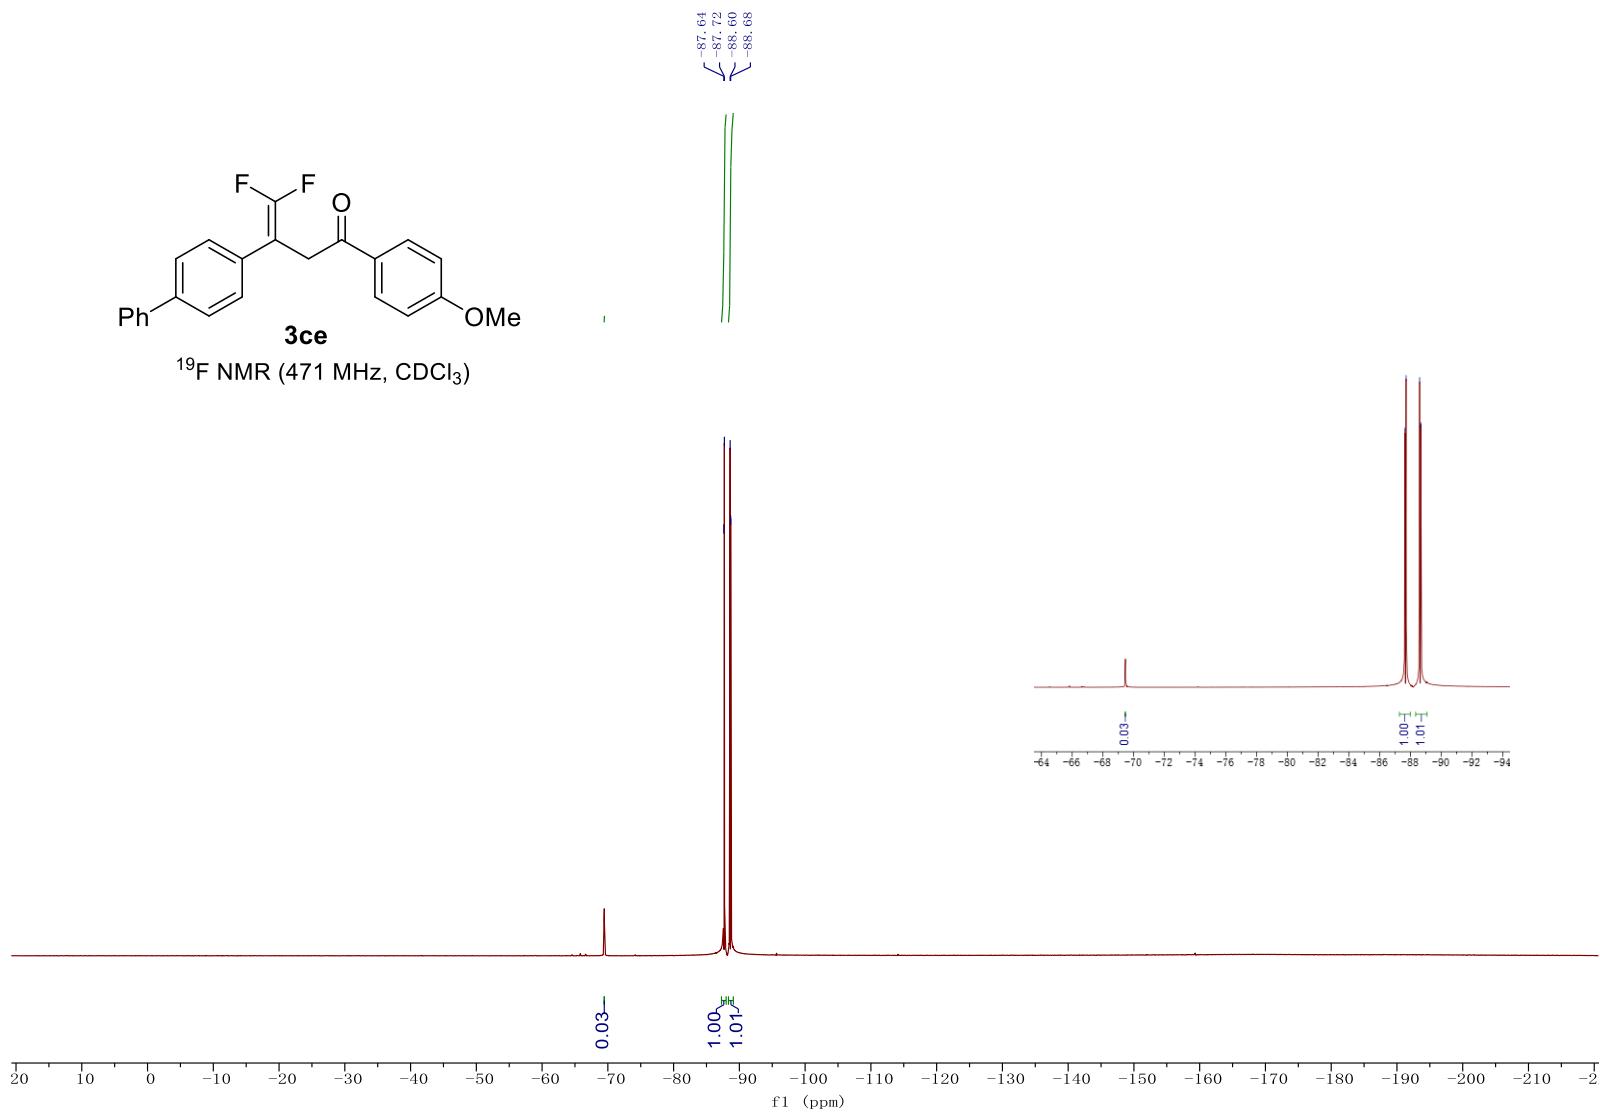

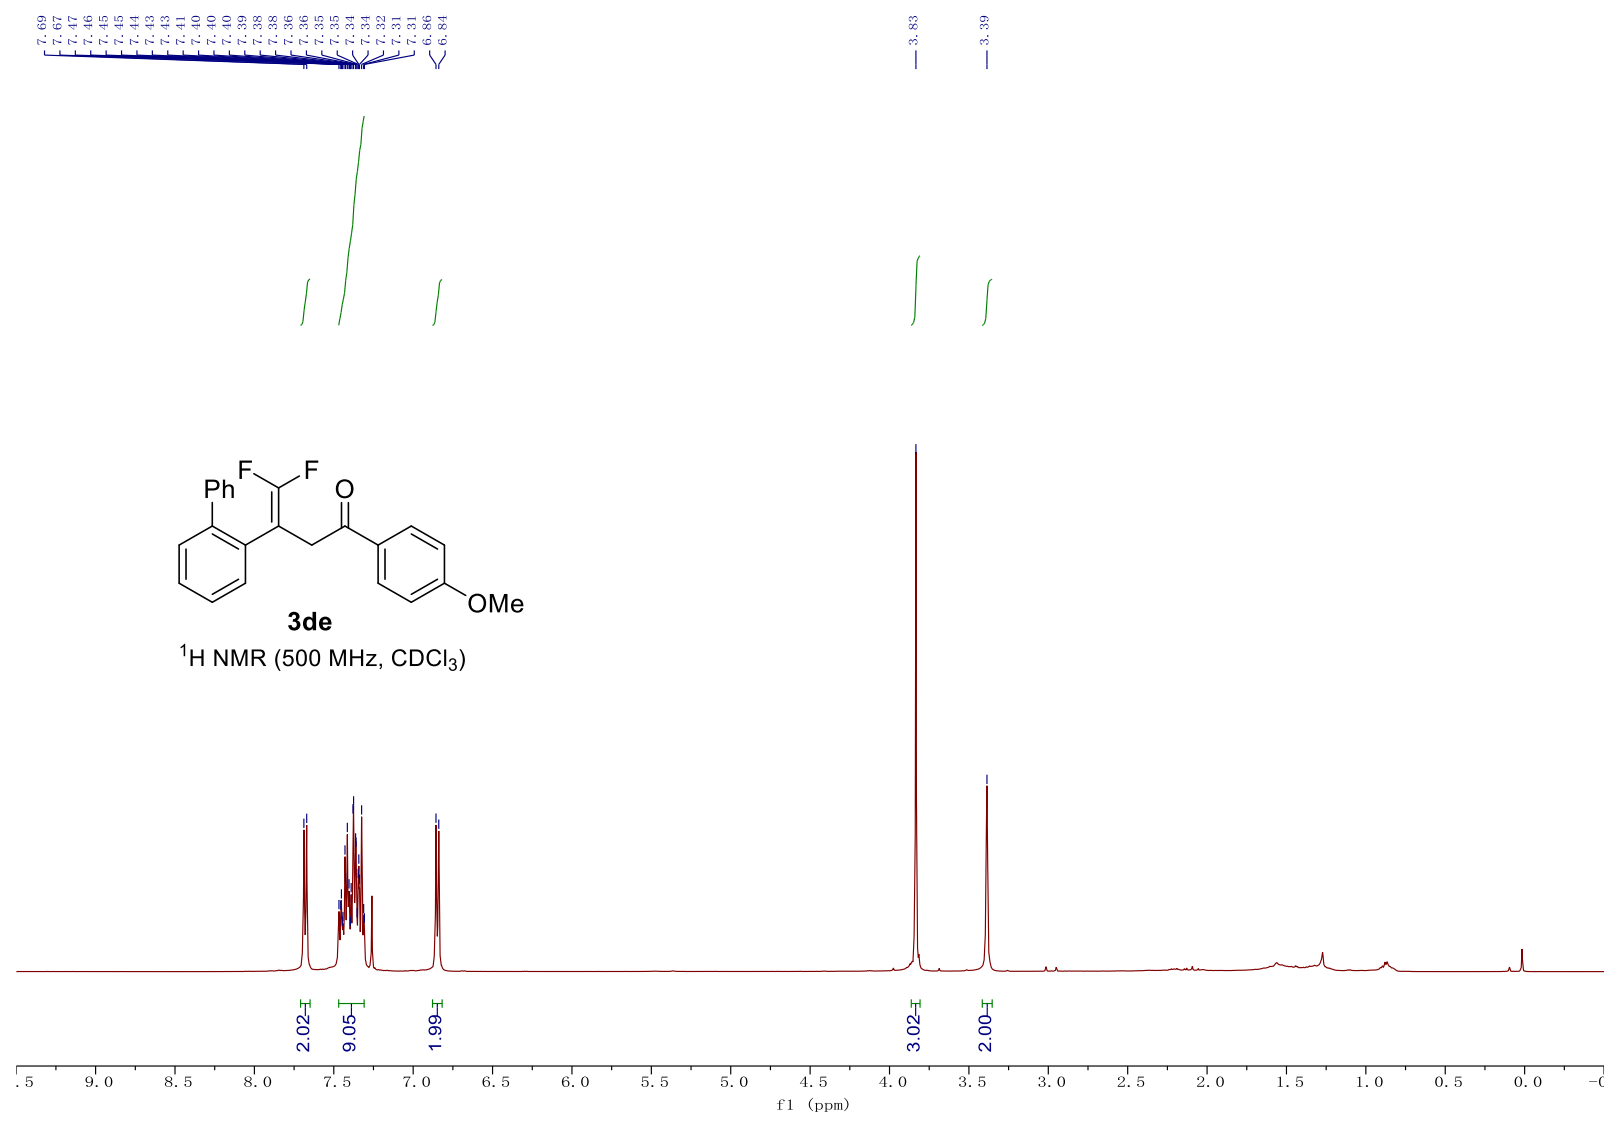



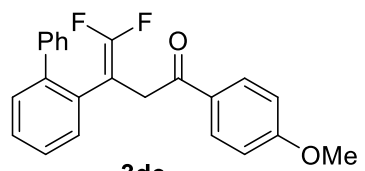

<sup>13</sup>C NMR (126 MHz, CDCl<sub>3</sub>)

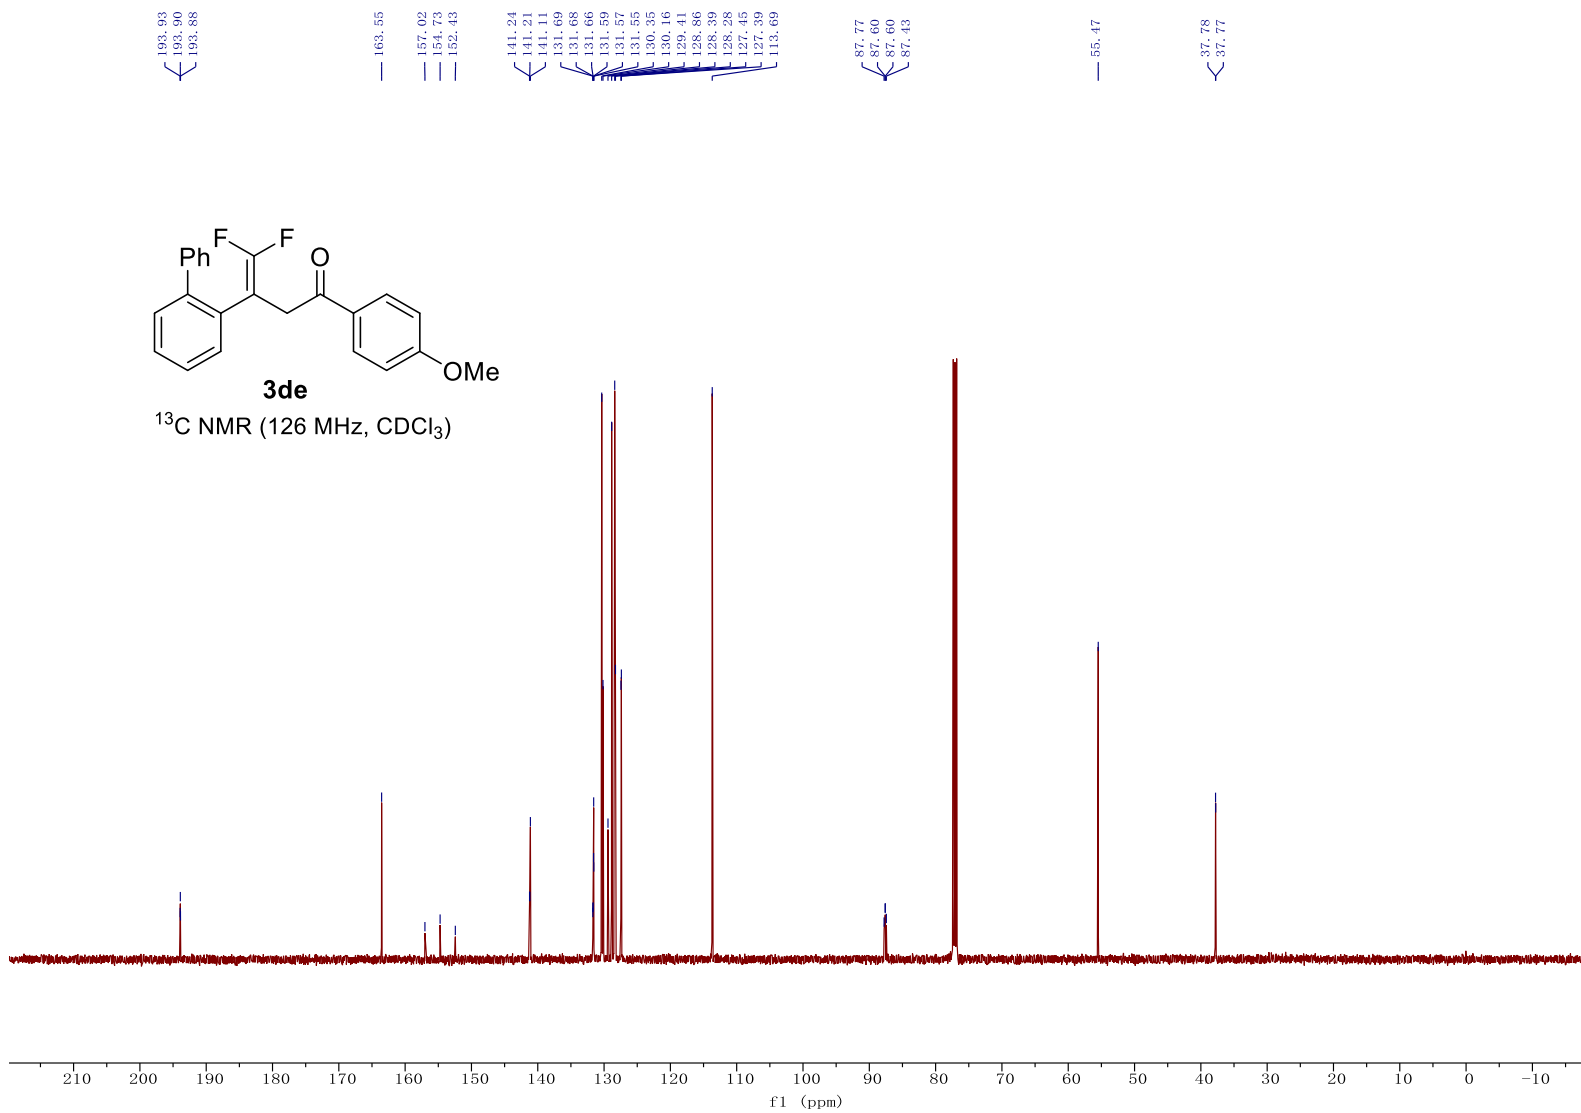

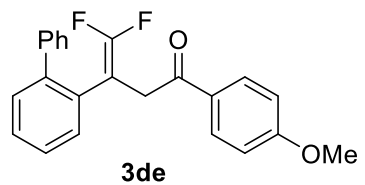

$^{19}\text{F}$  NMR (471 MHz,  $\text{CDCl}_3$ )

-88.98  
-89.06  
-90.71  
-90.82

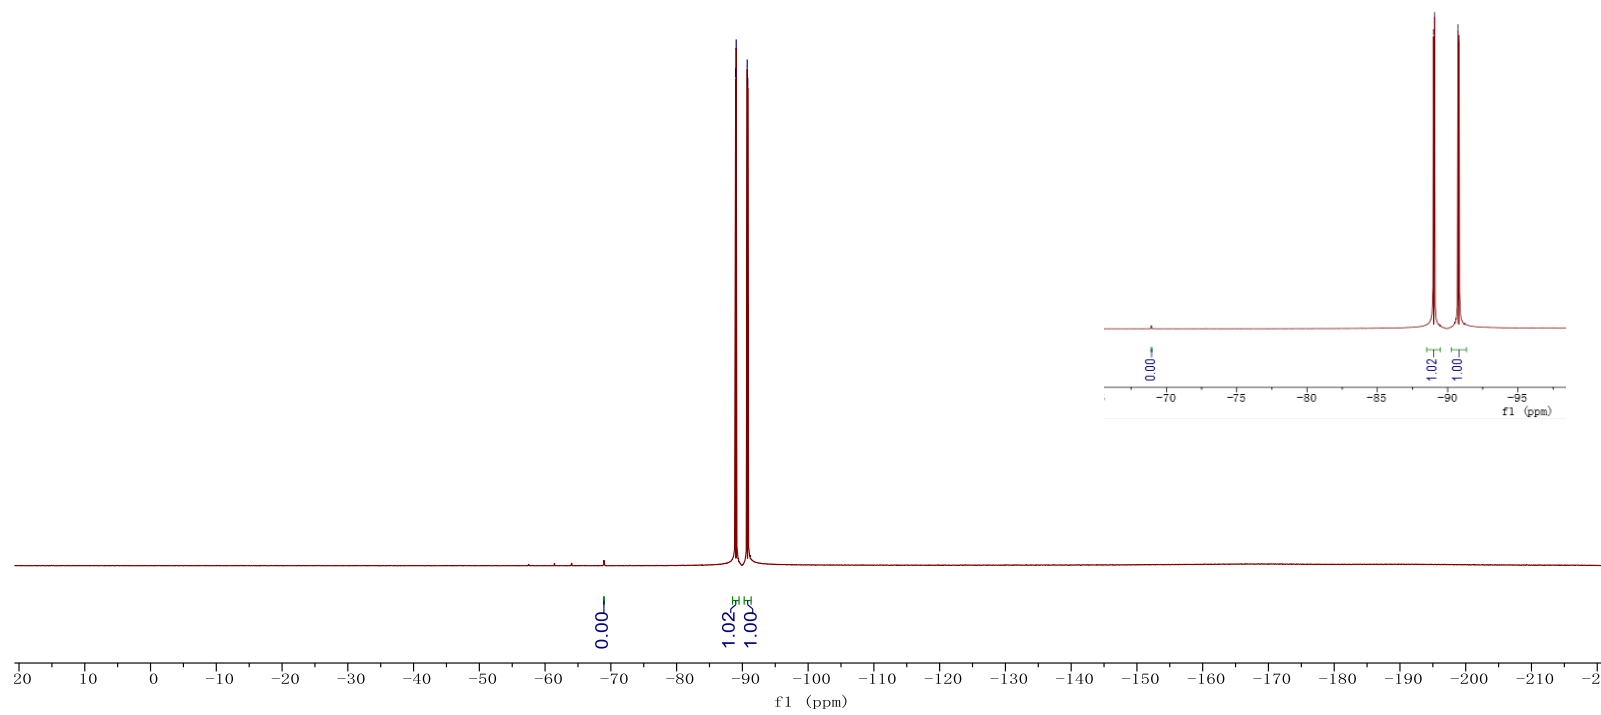

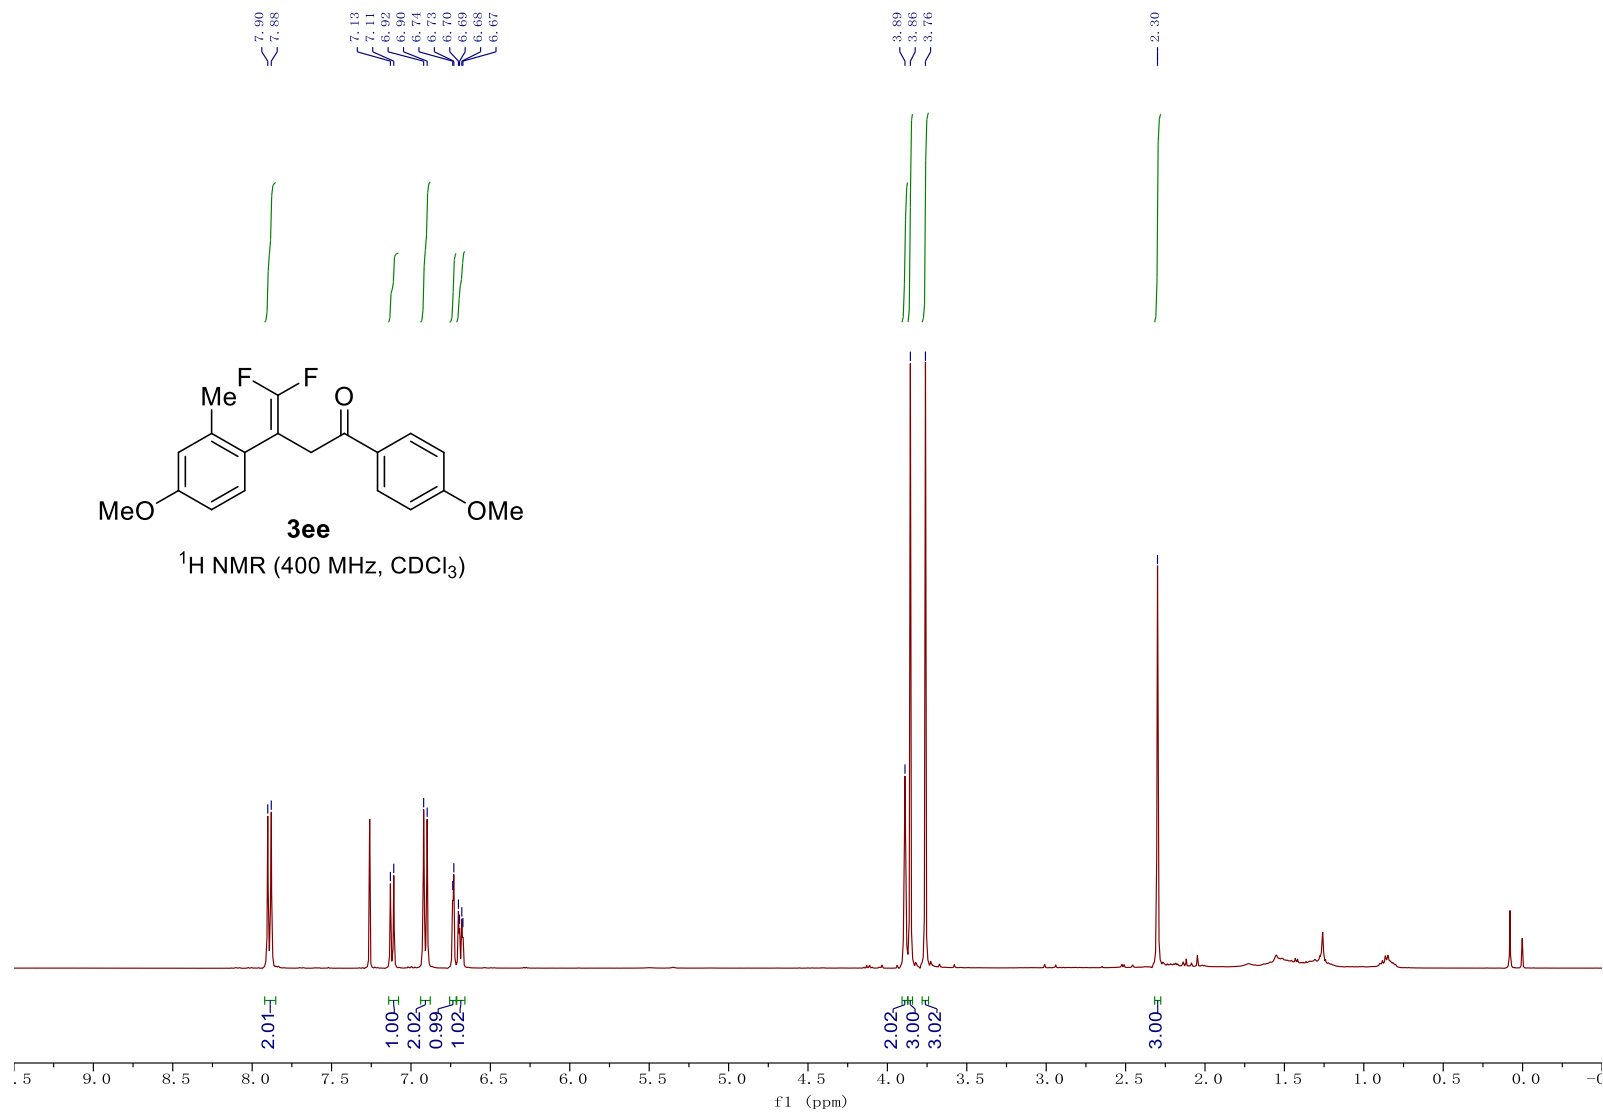

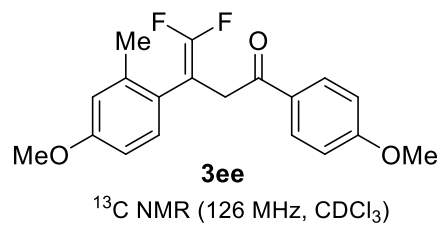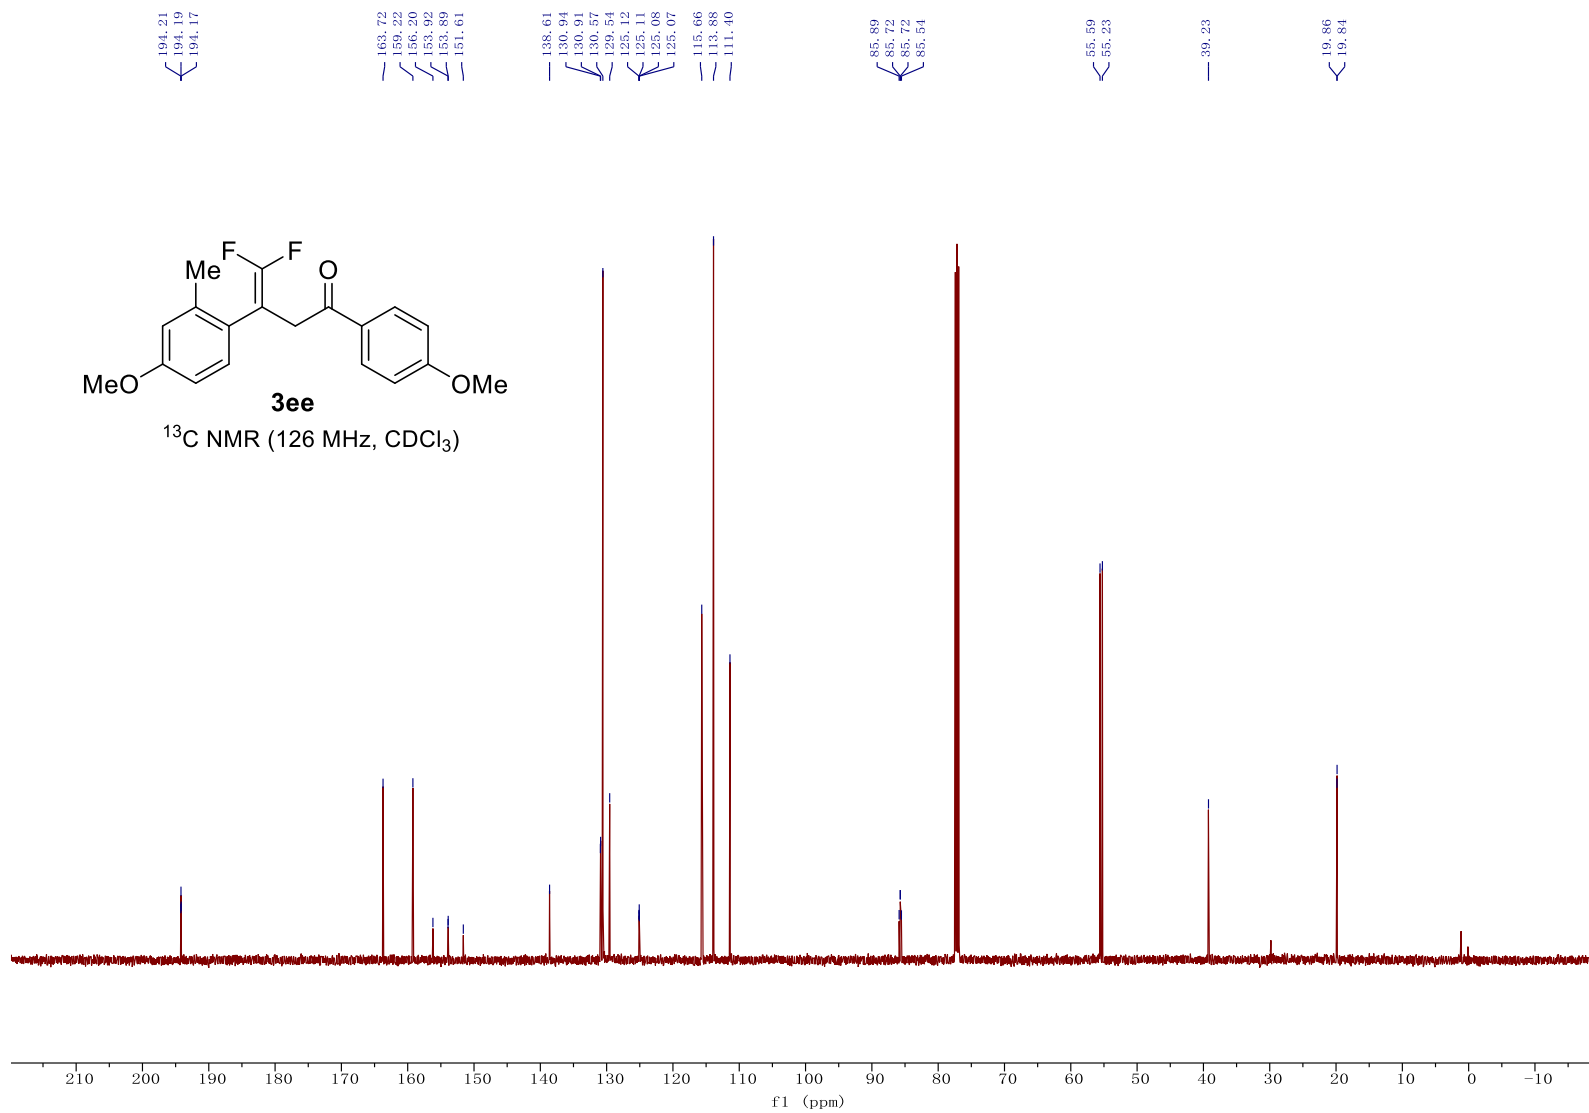

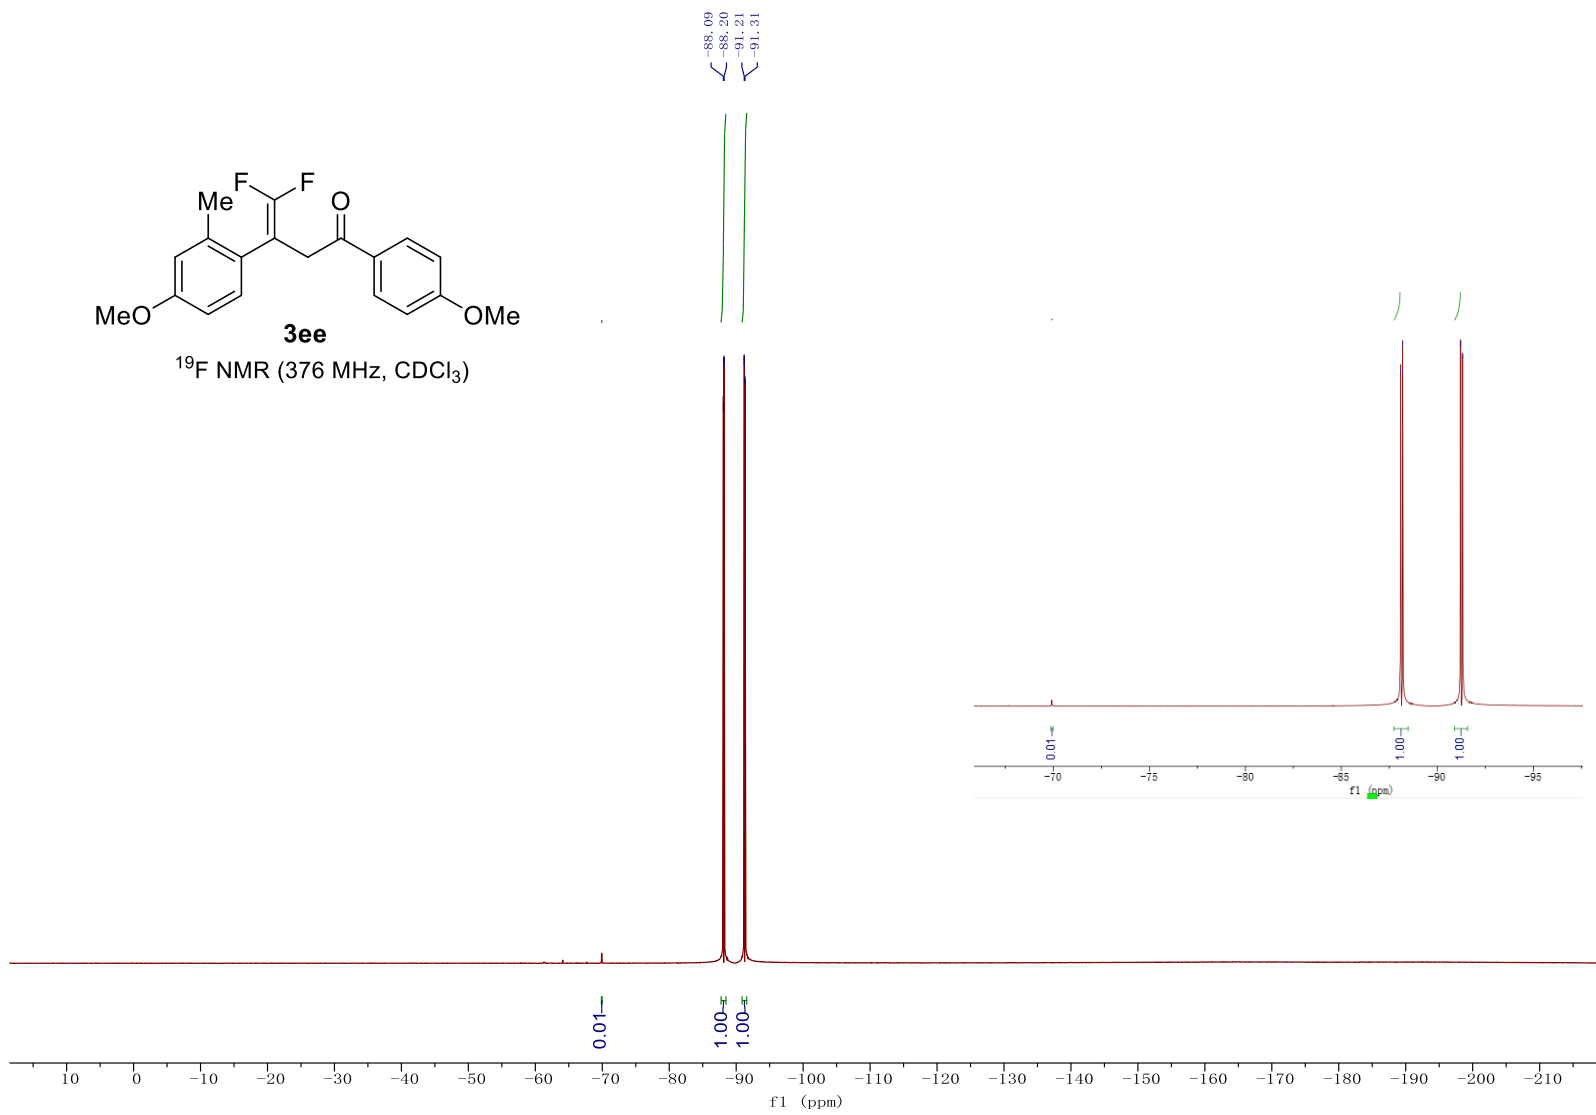

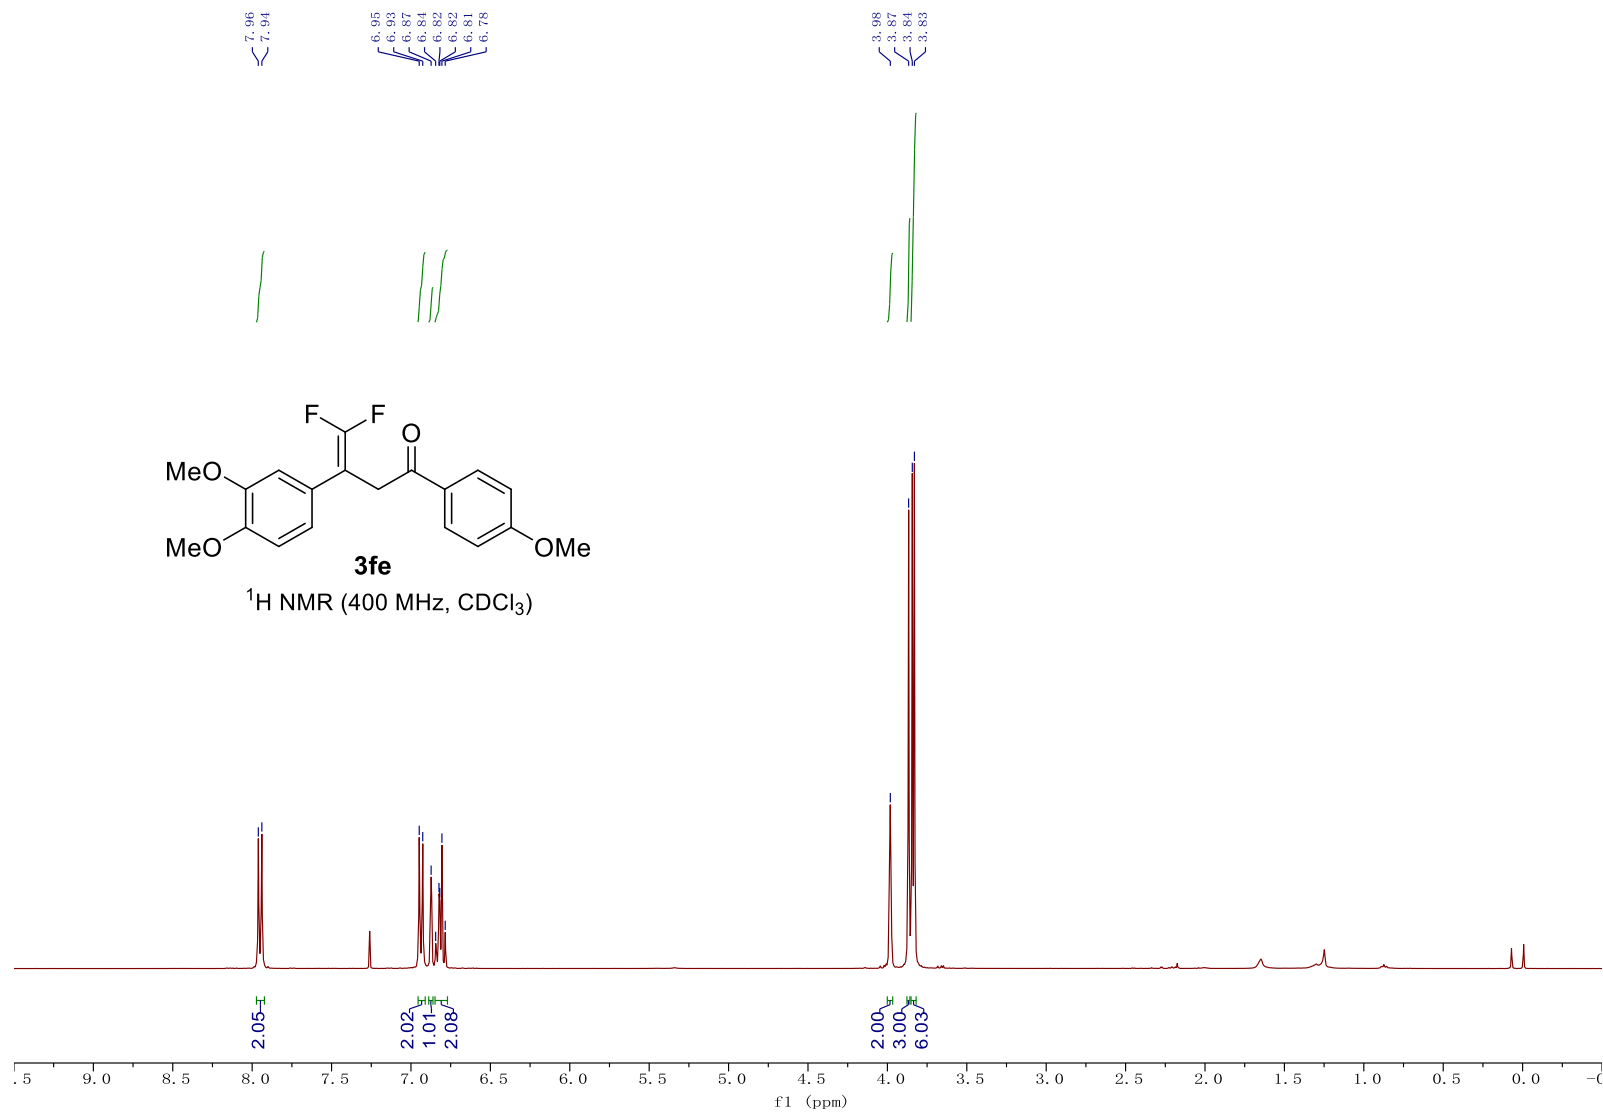

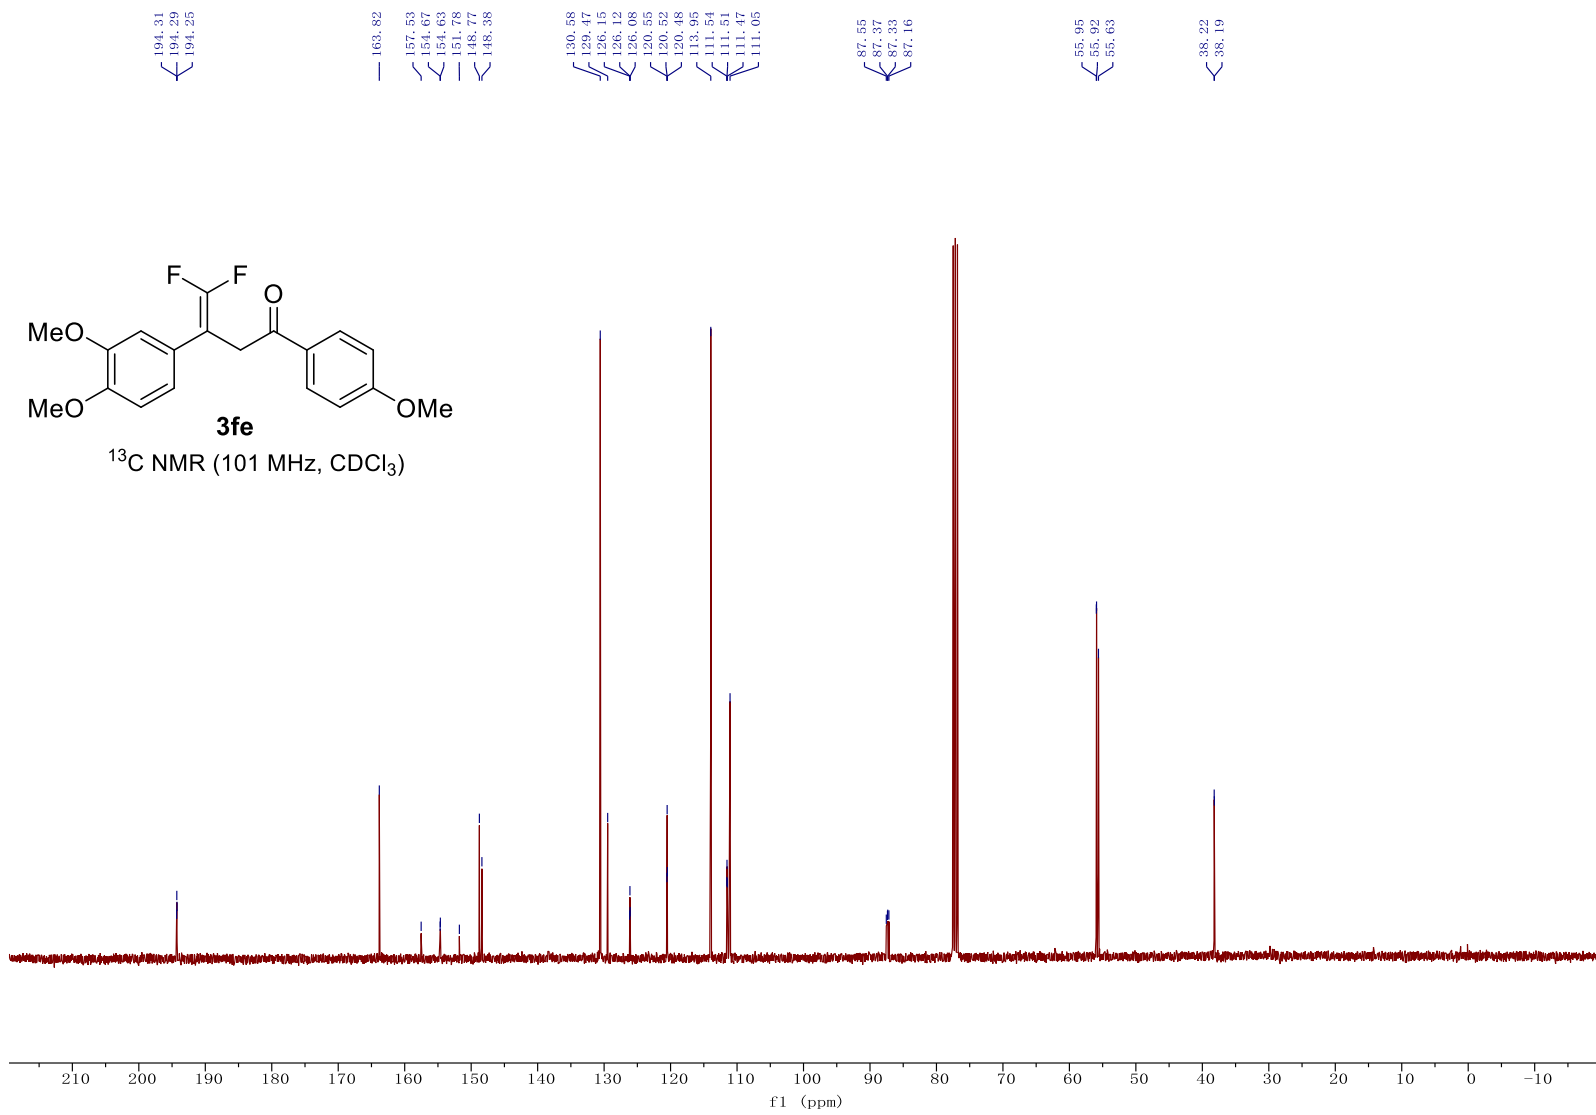

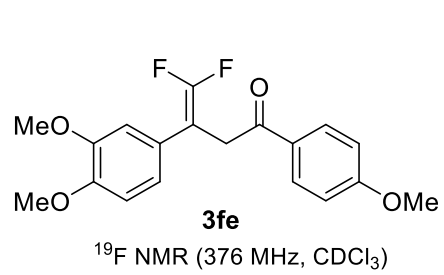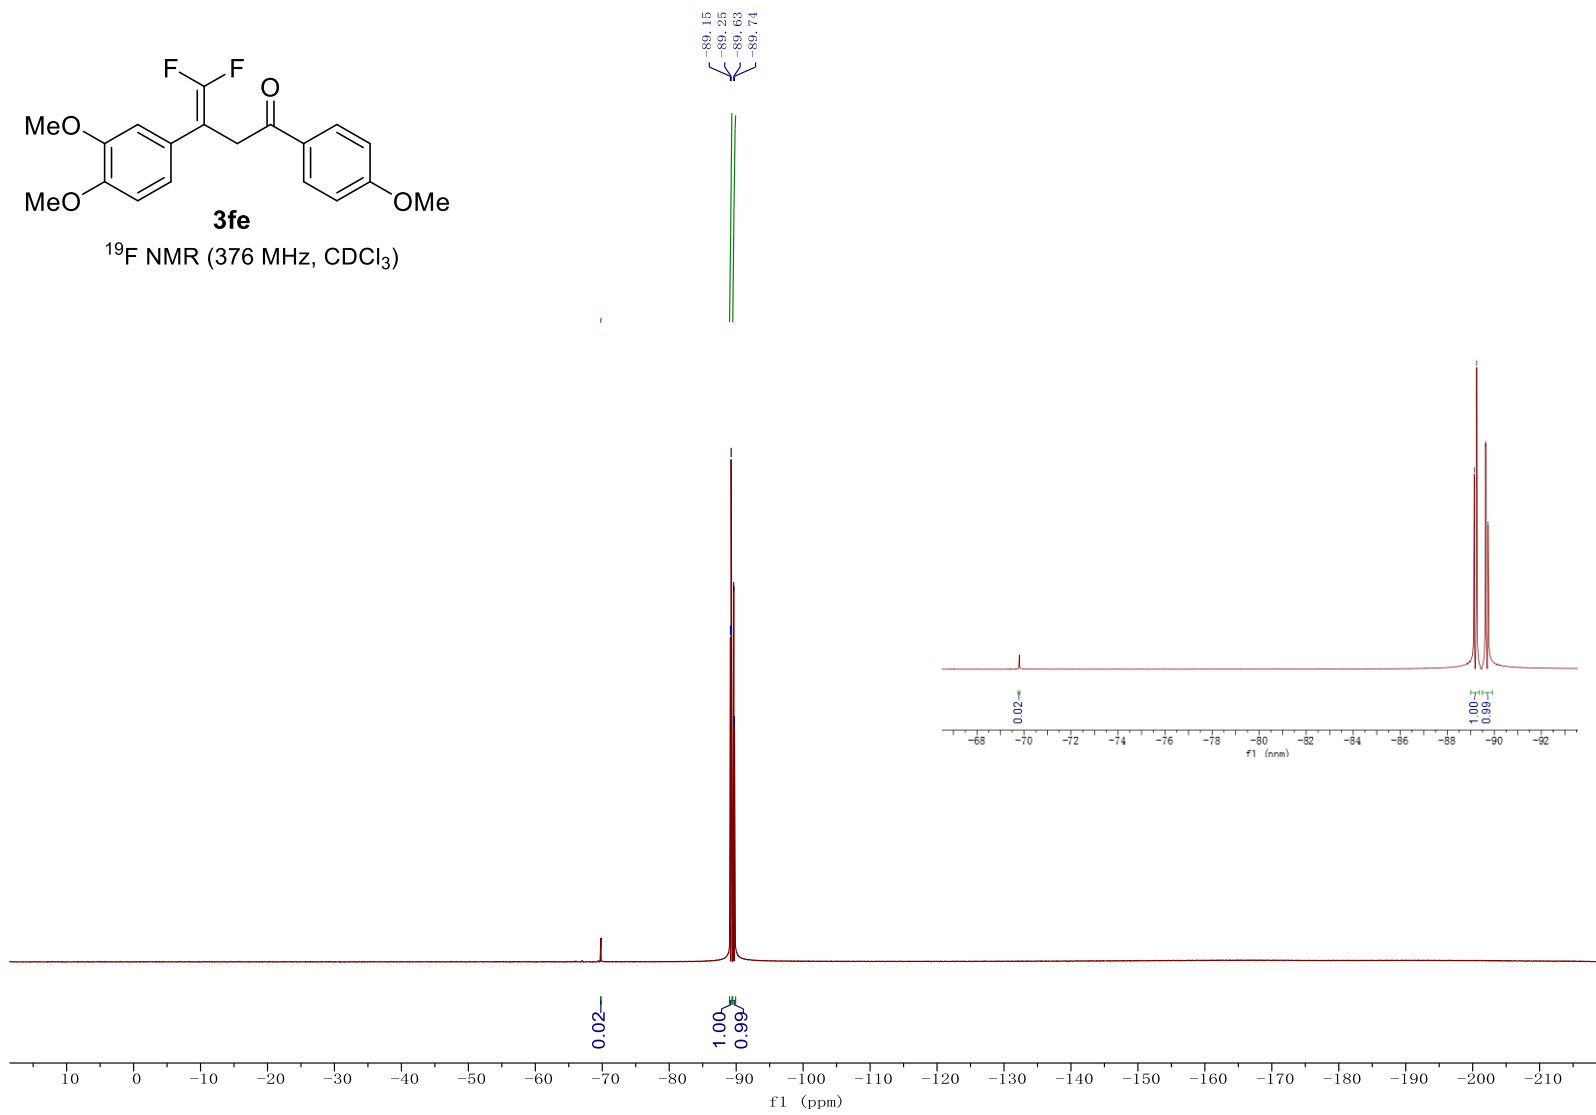



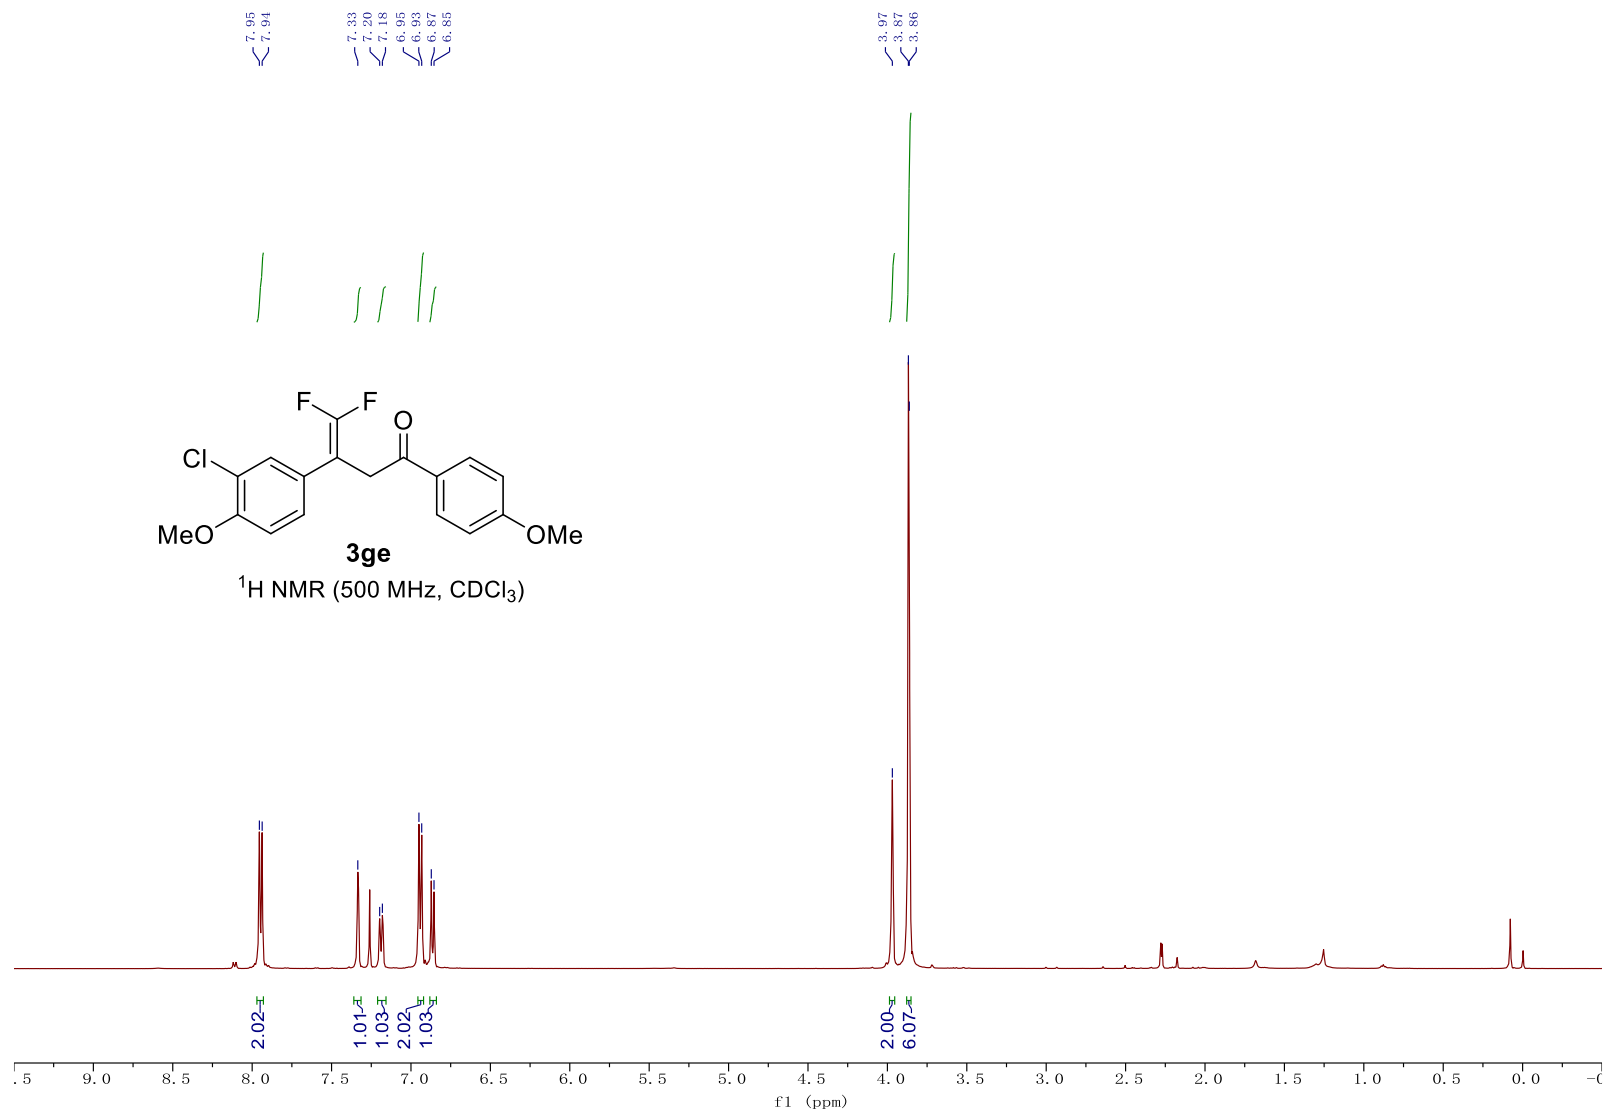

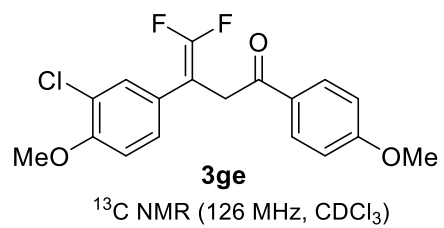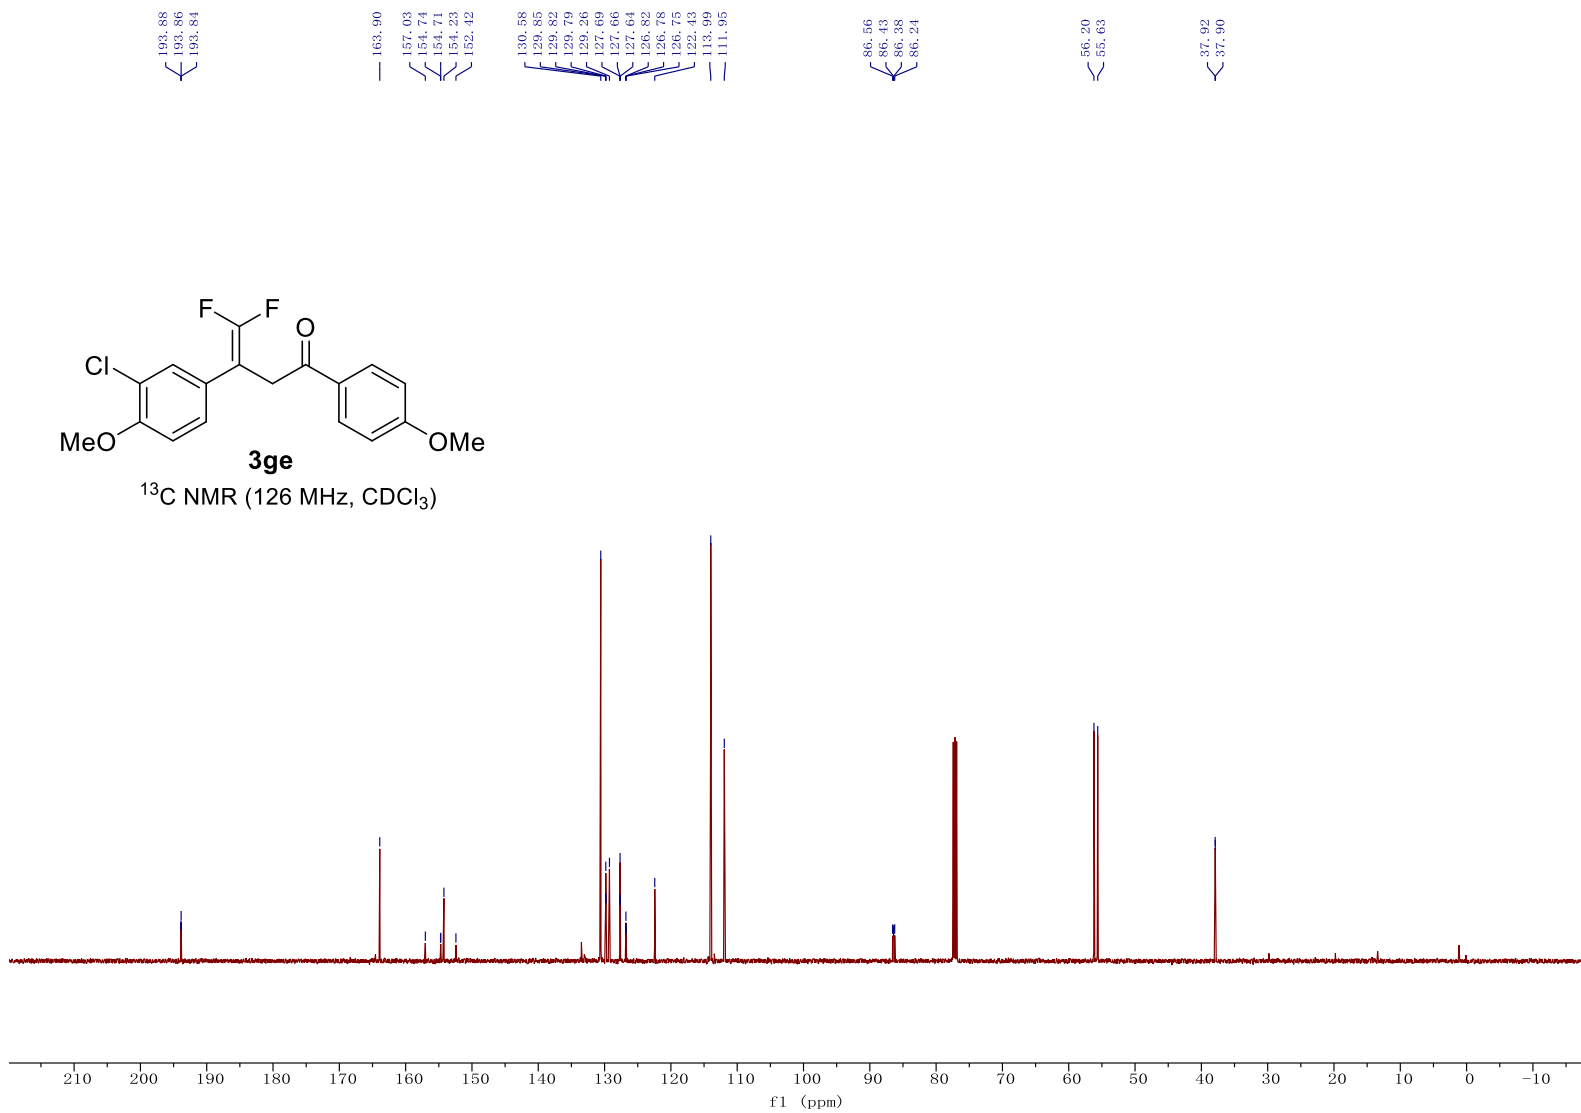

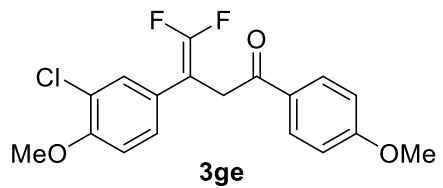

$^{19}\text{F}$  NMR (471 MHz,  $\text{CDCl}_3$ )

-88.36  
-88.44  
-89.08  
-89.16

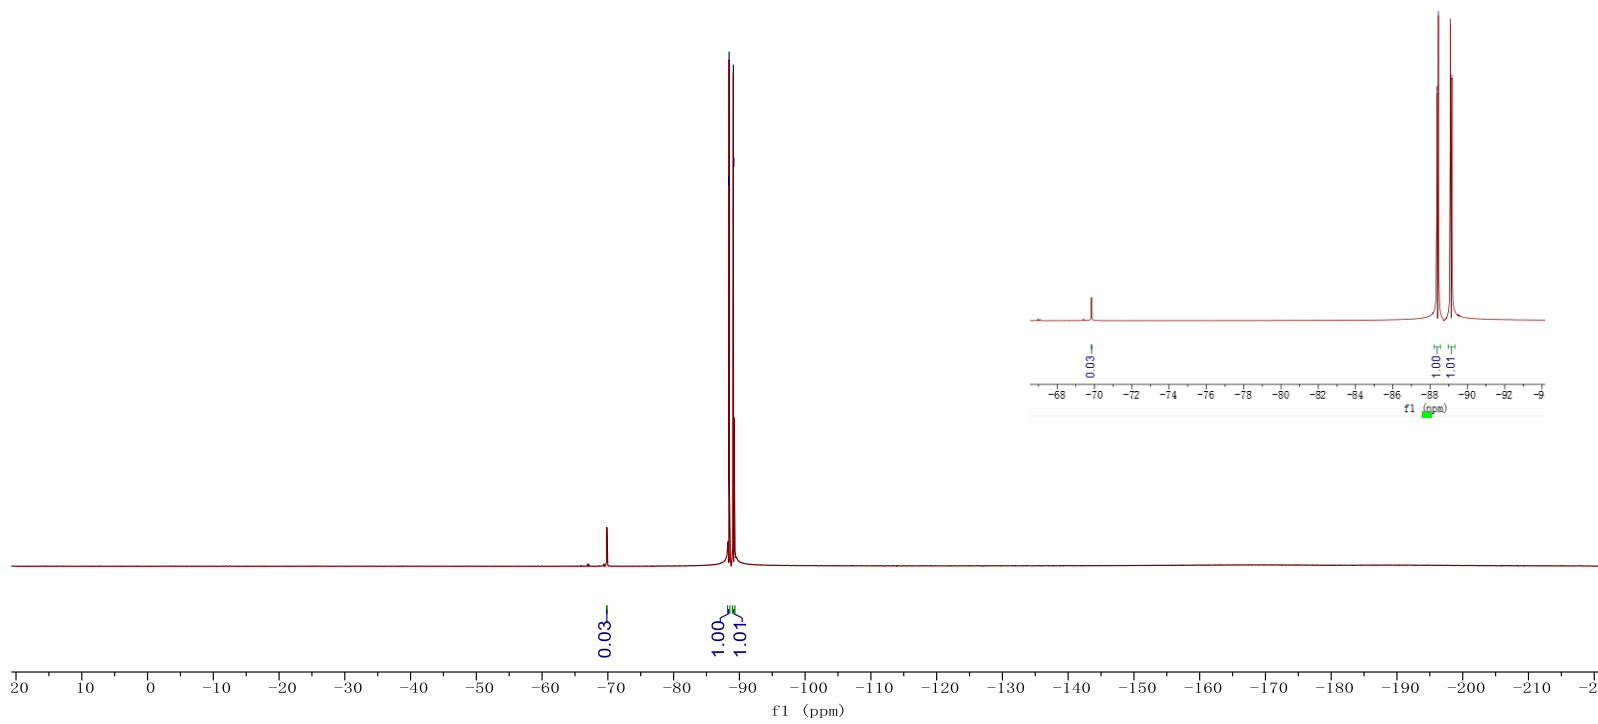

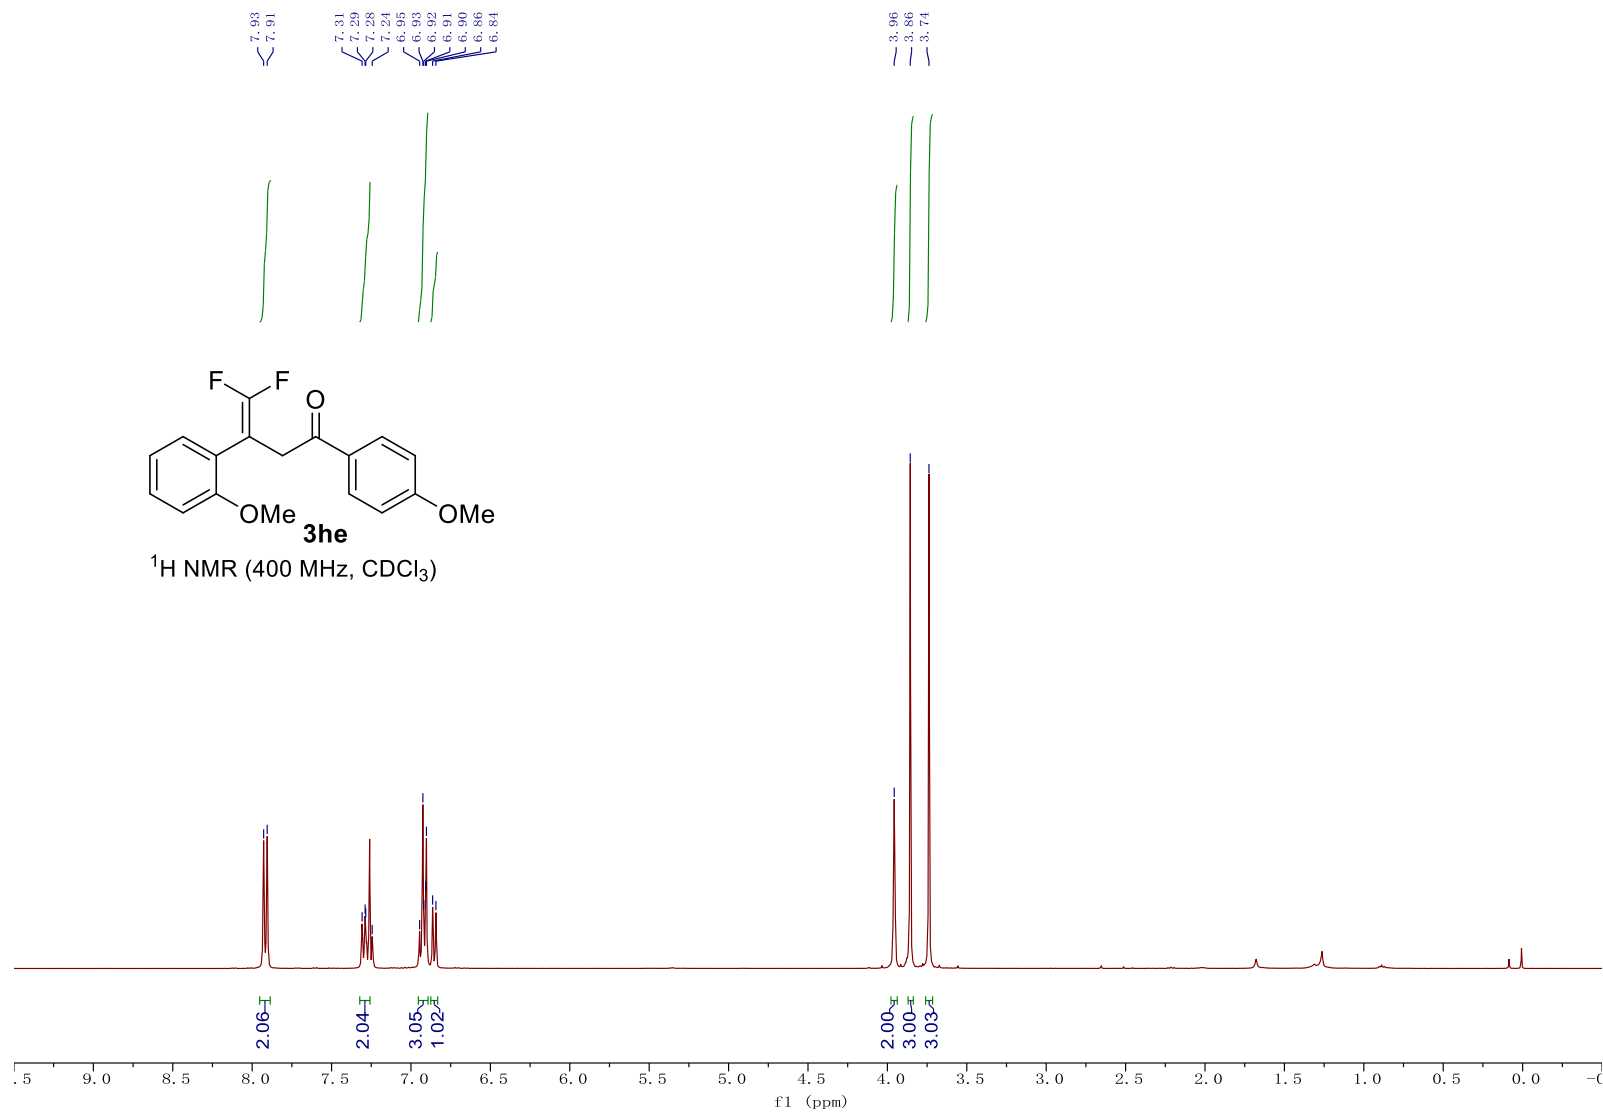

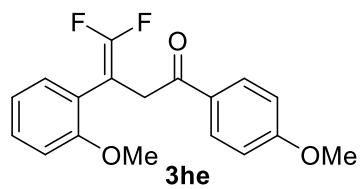

$^{13}\text{C}$  NMR (126 MHz,  $\text{CDCl}_3$ )

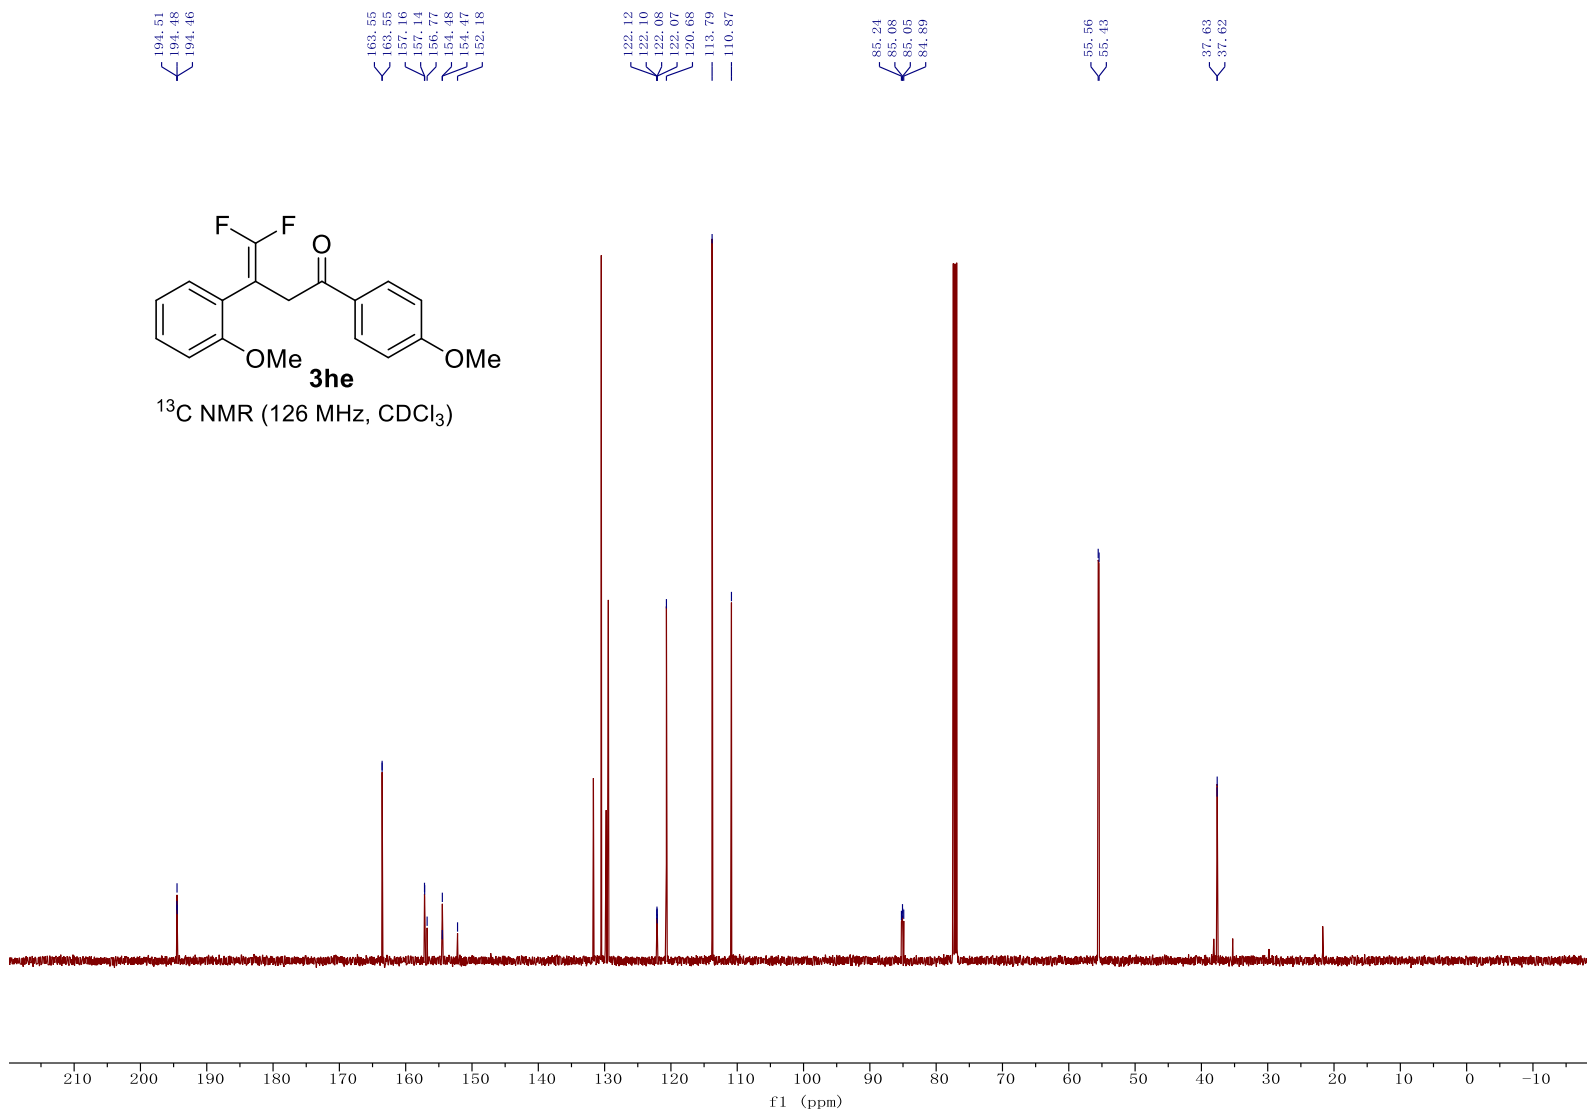

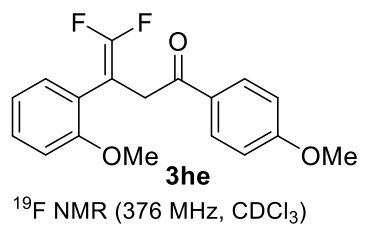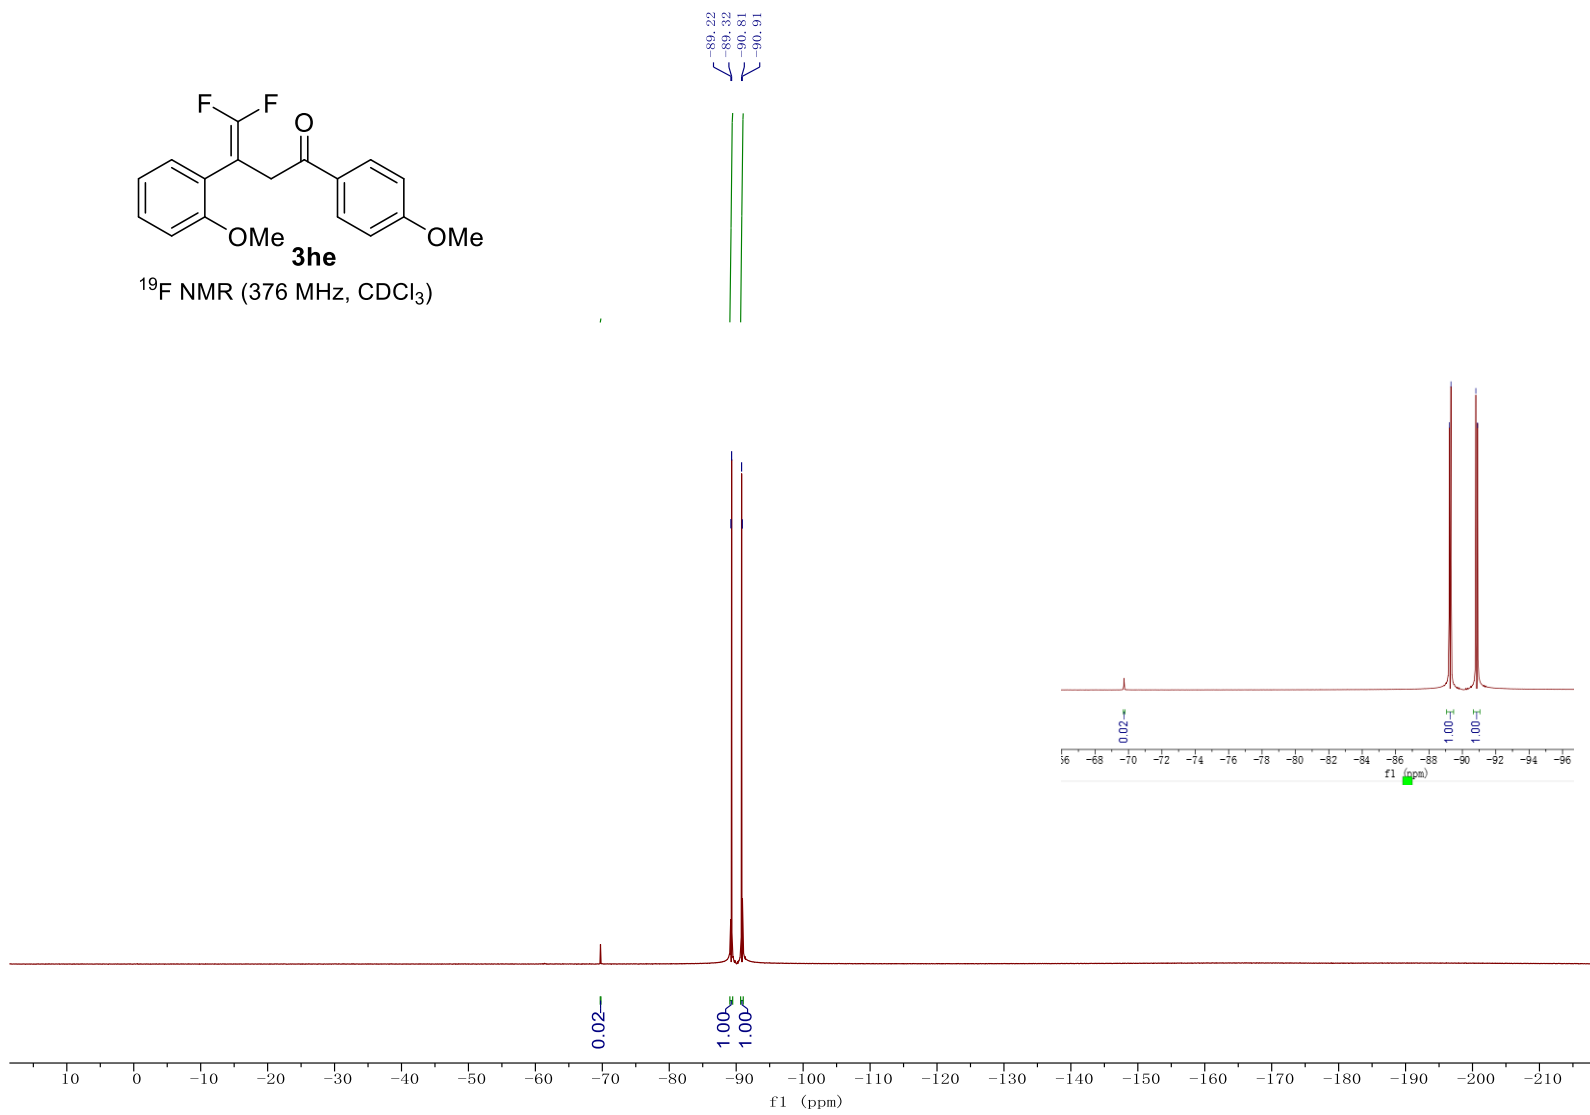

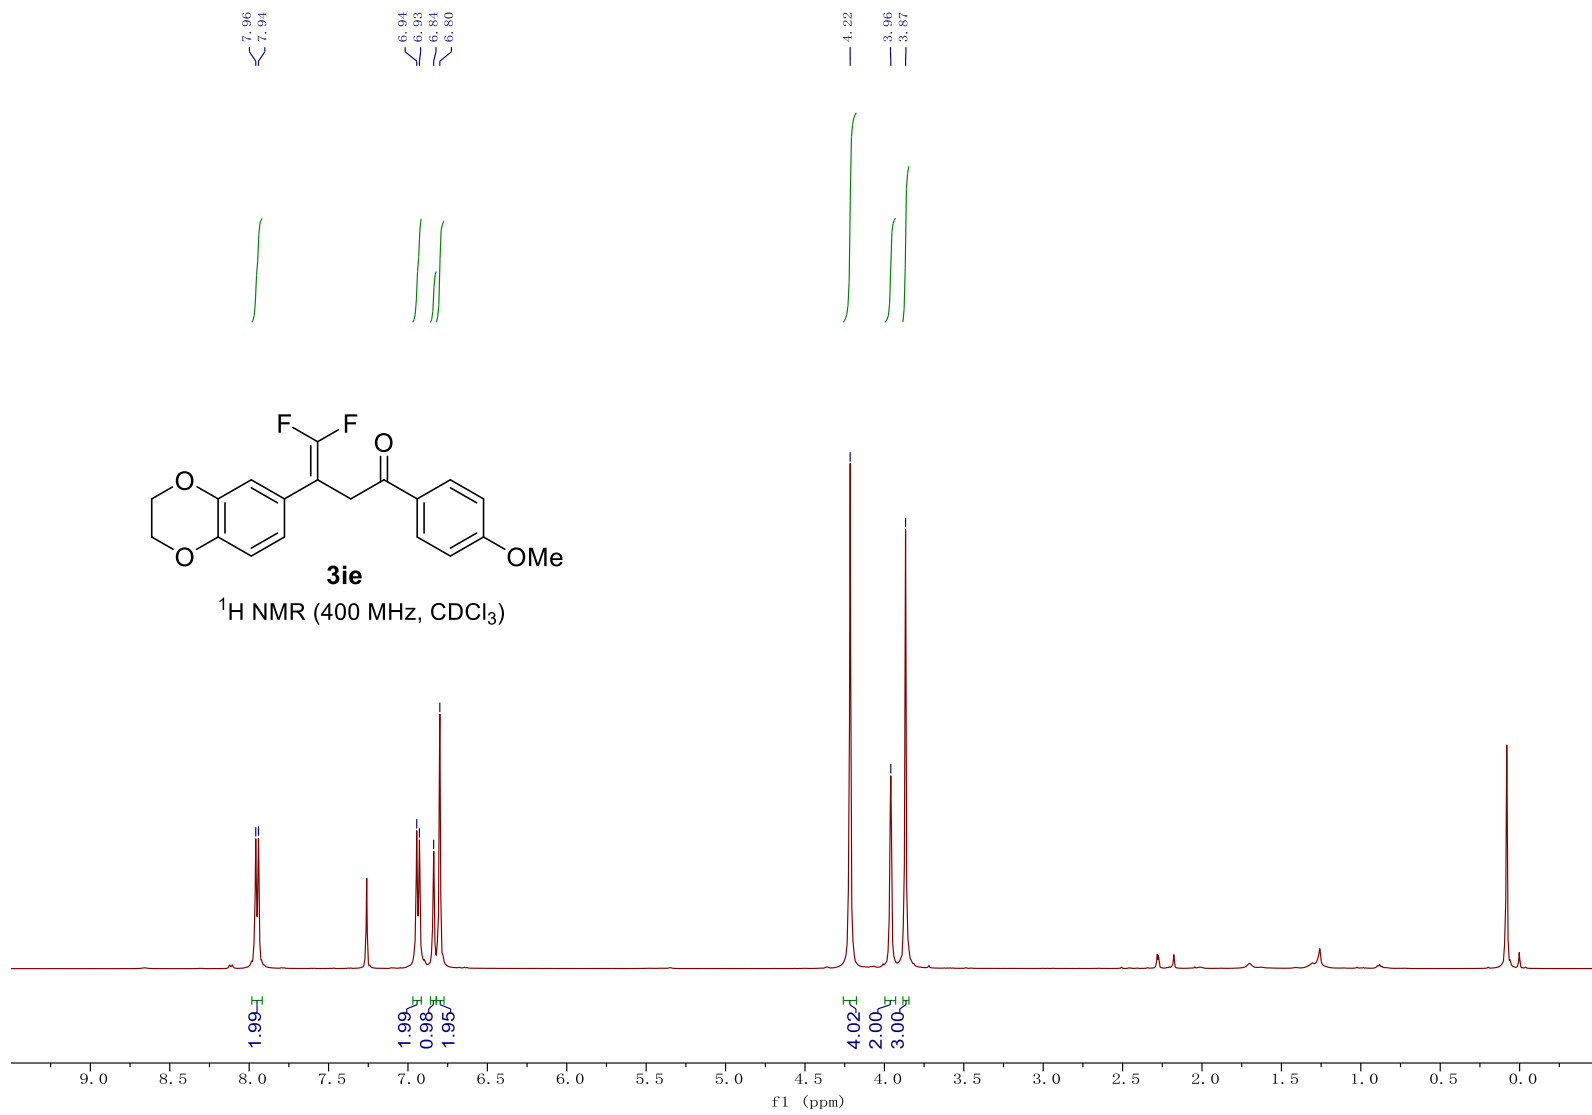

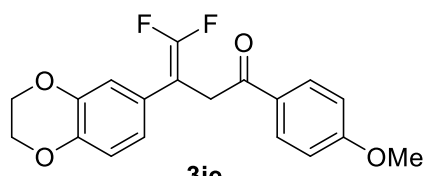

$^{13}\text{C}$  NMR (126 MHz,  $\text{CDCl}_3$ )

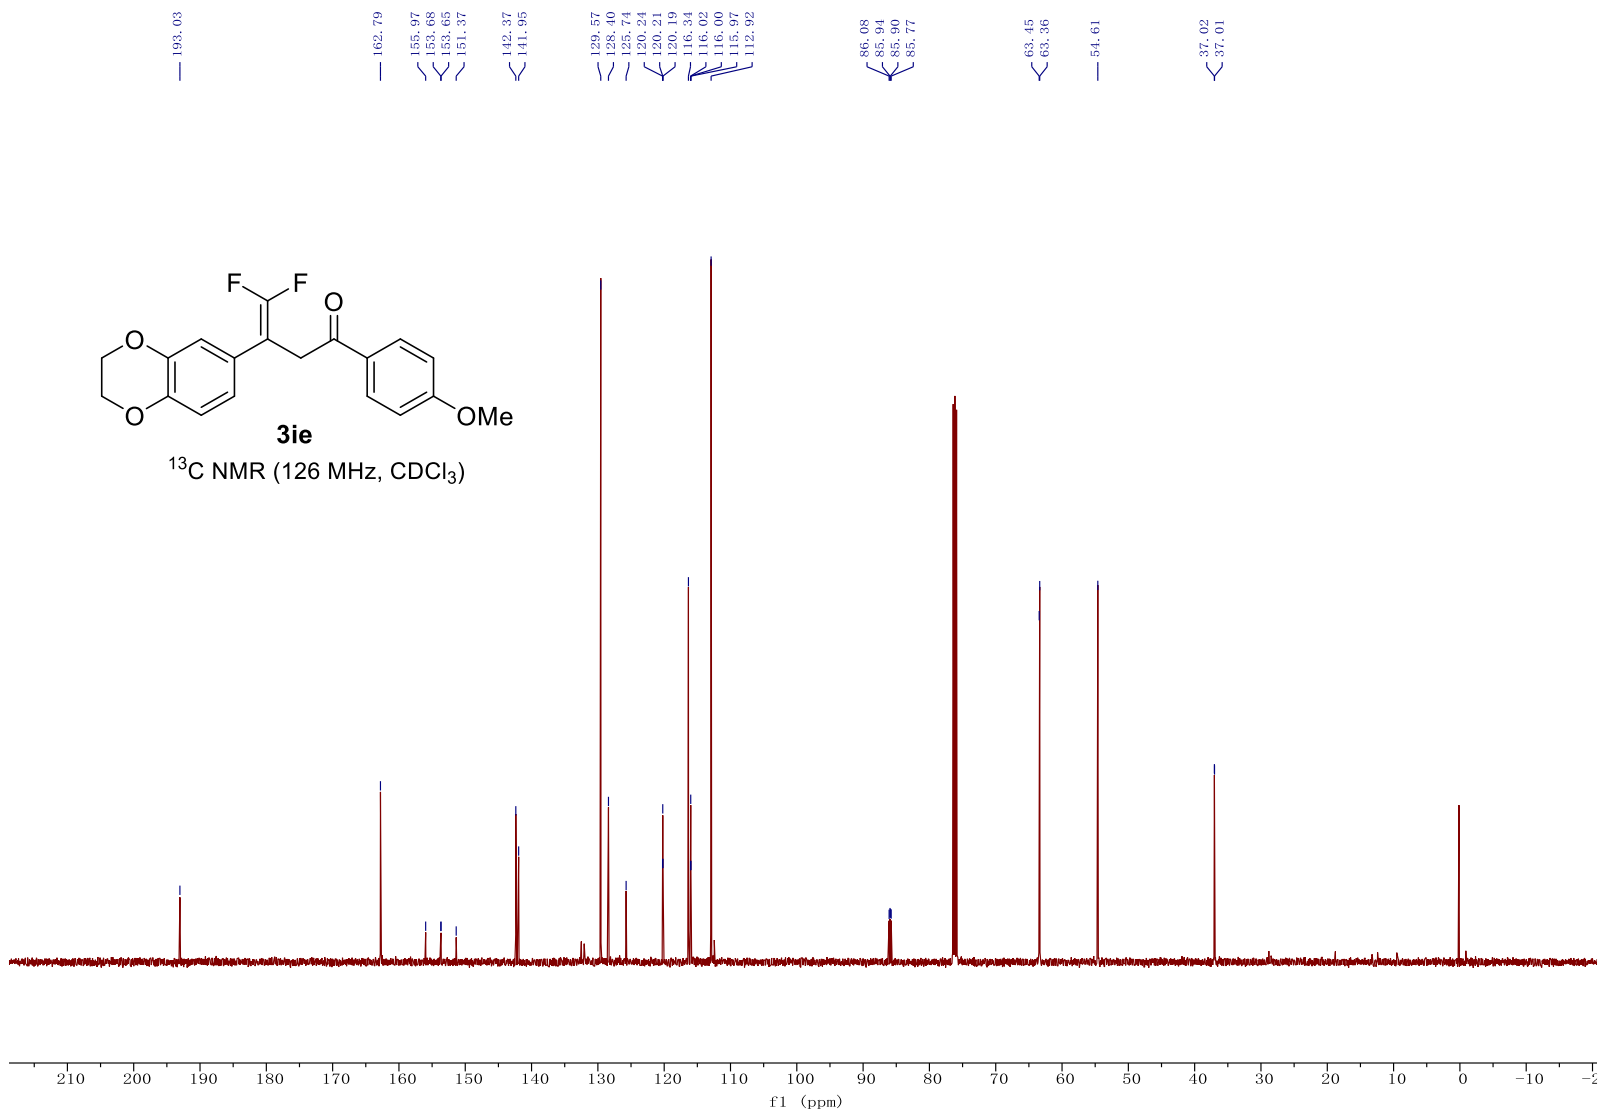



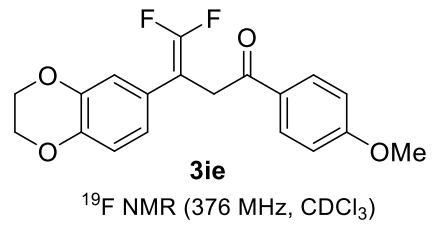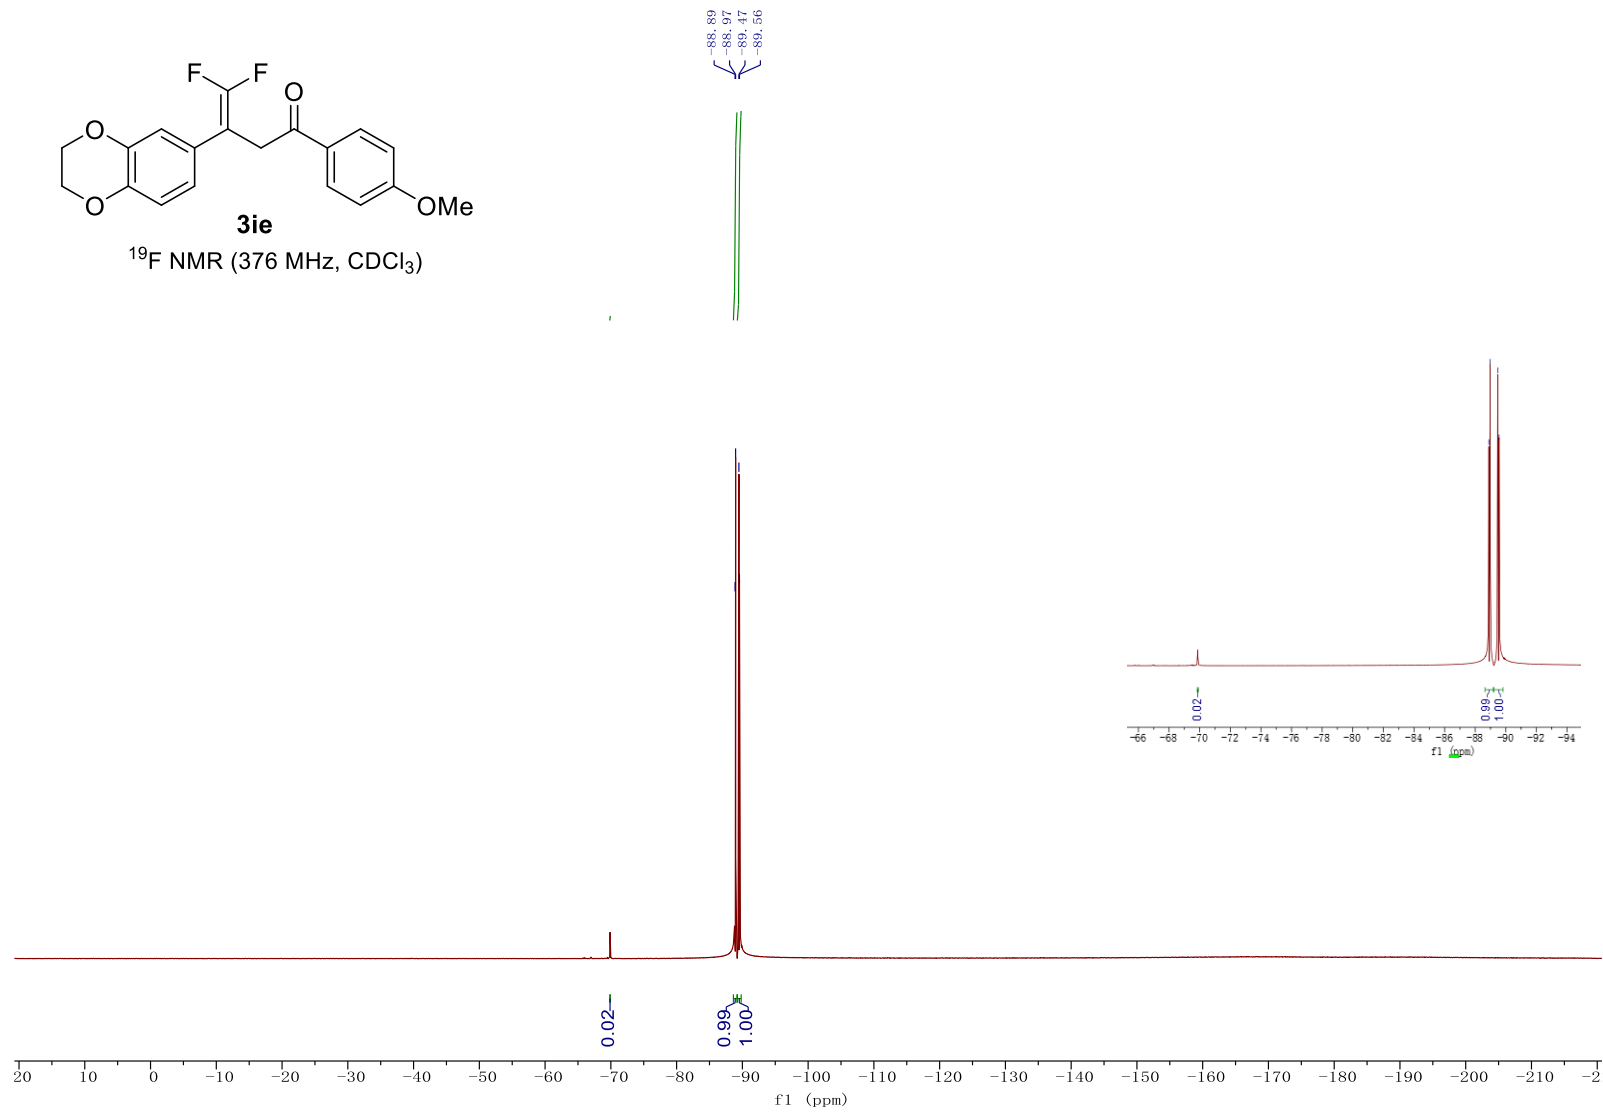

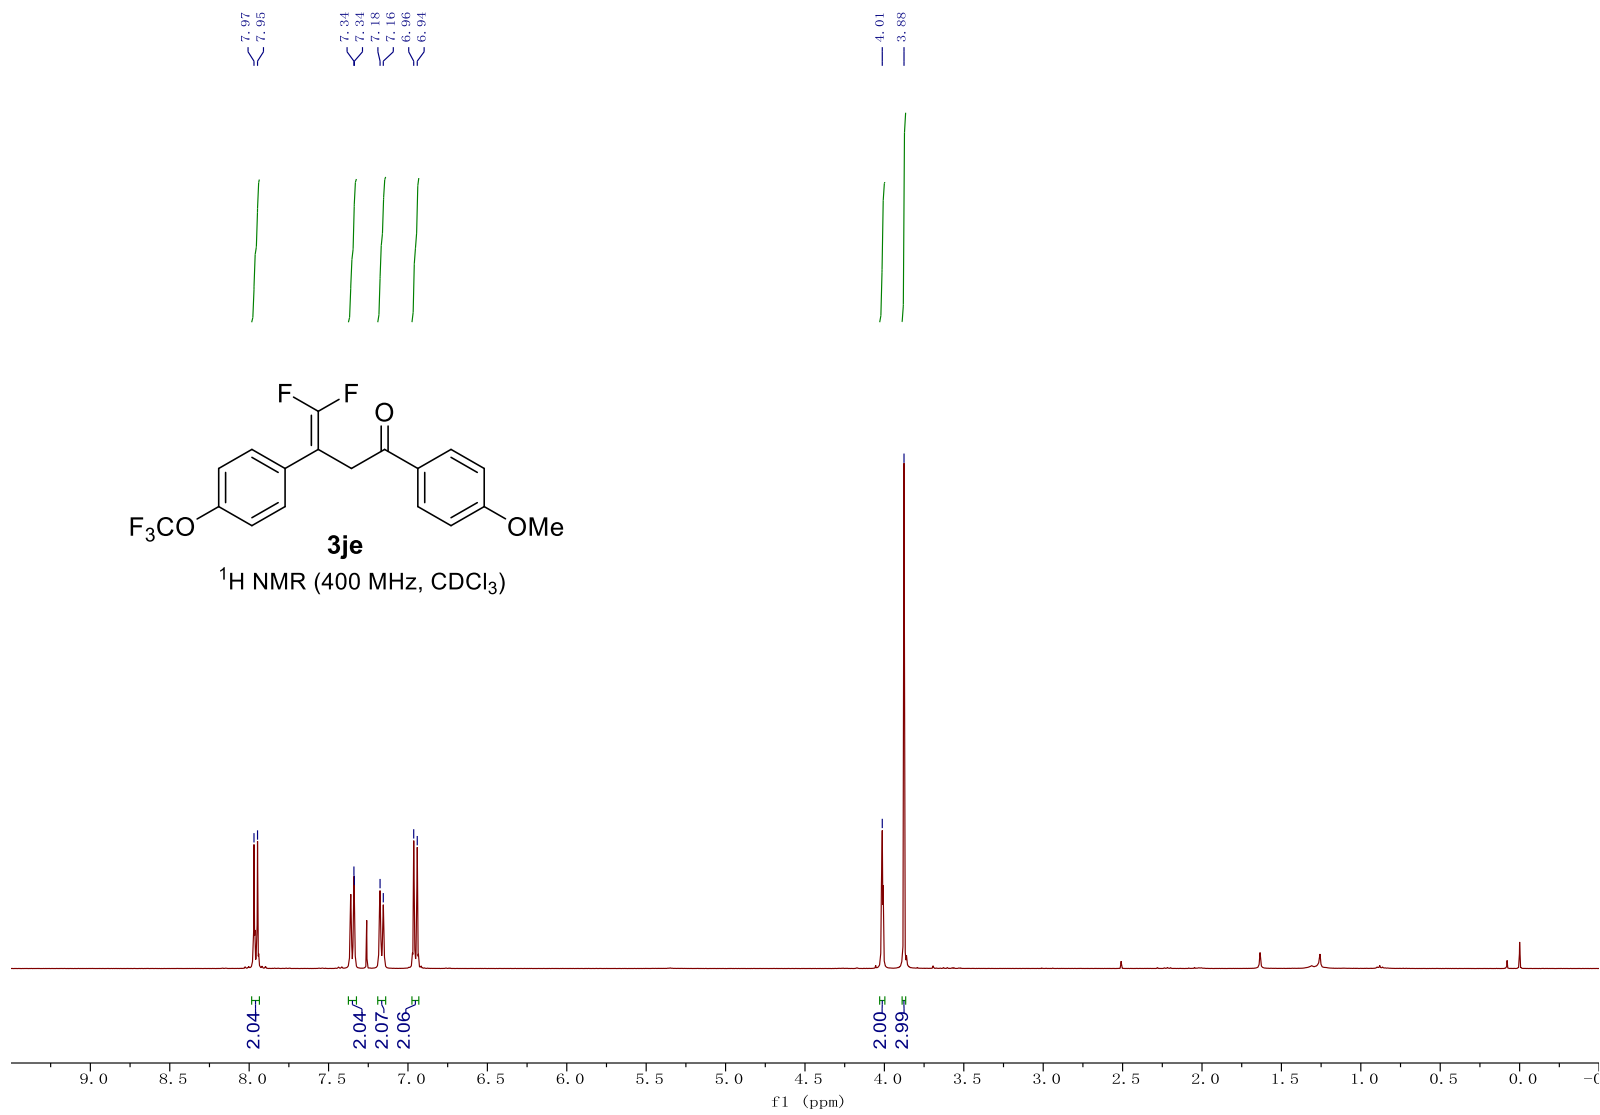

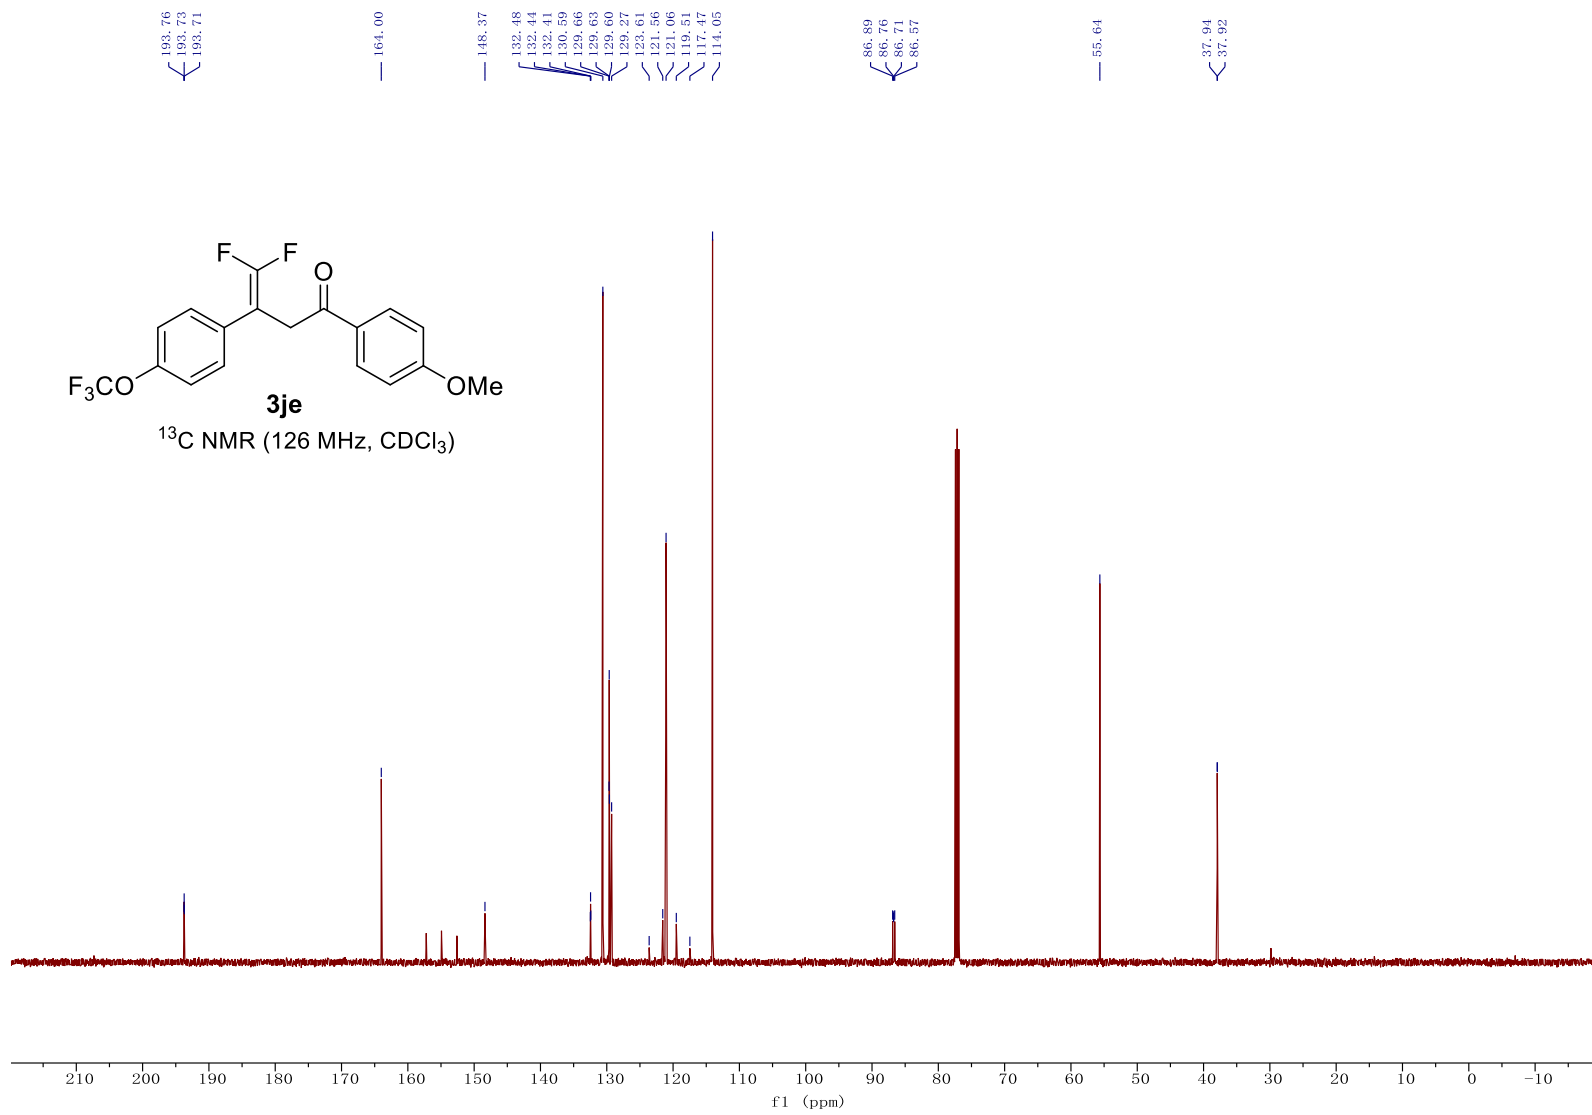

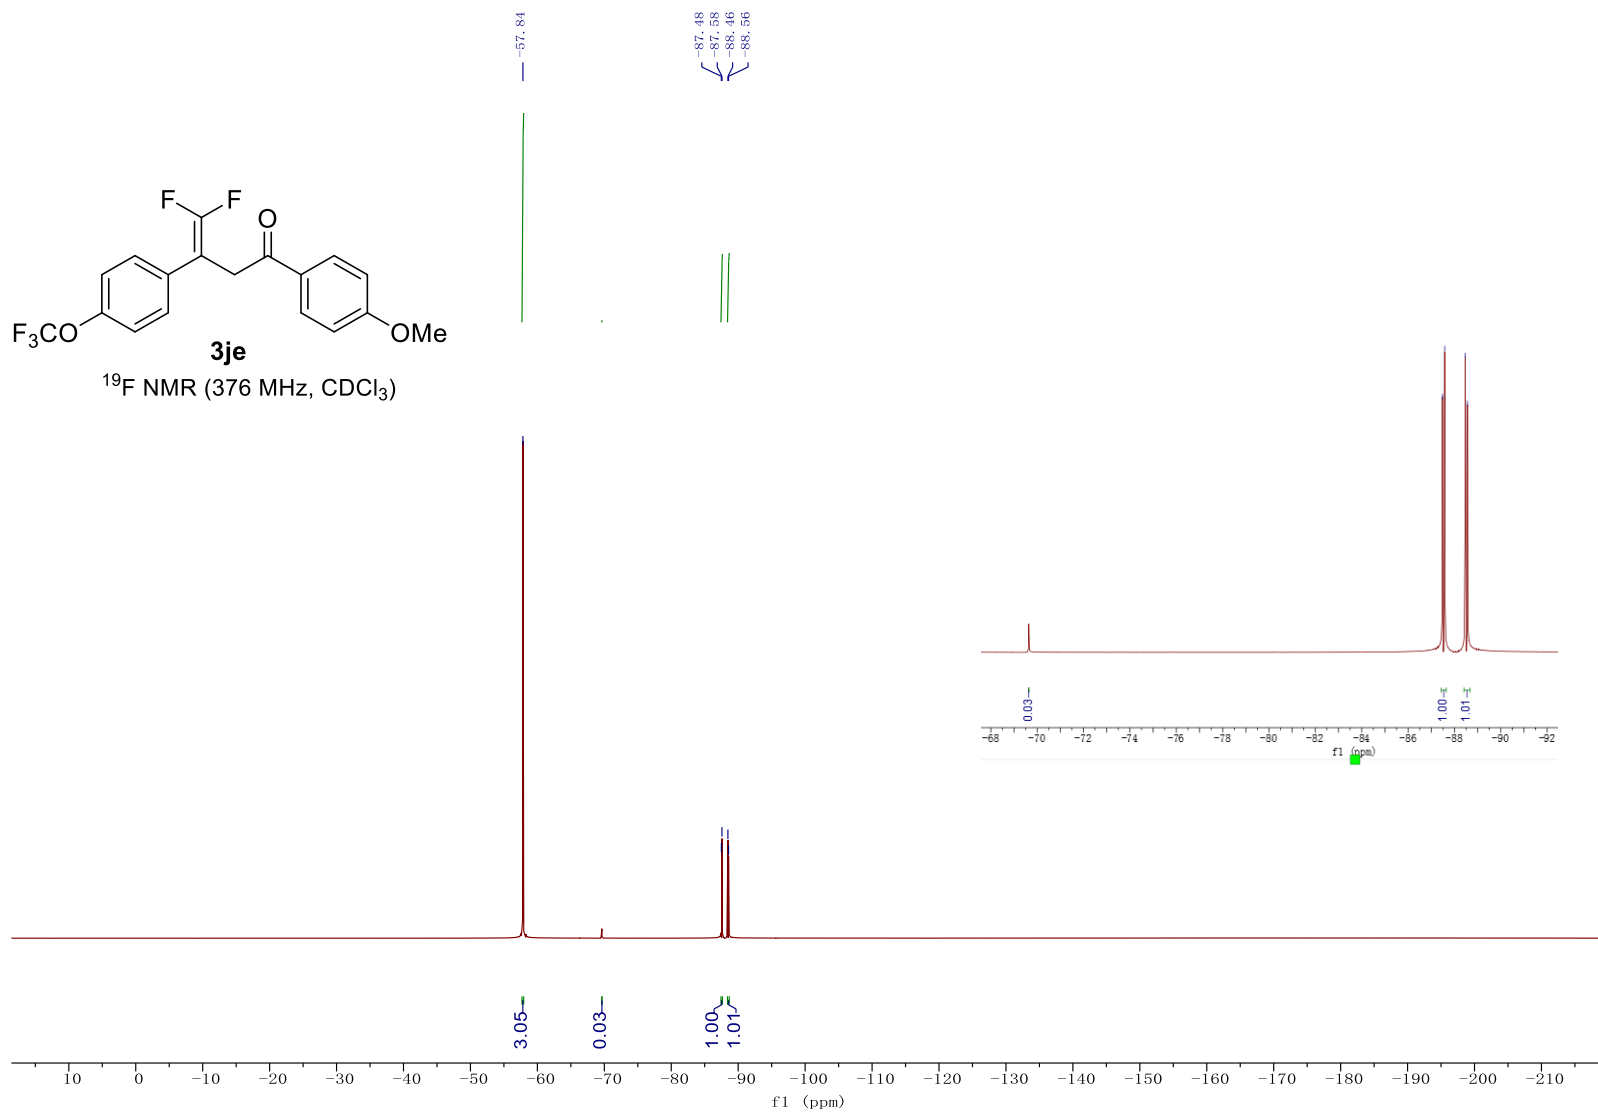

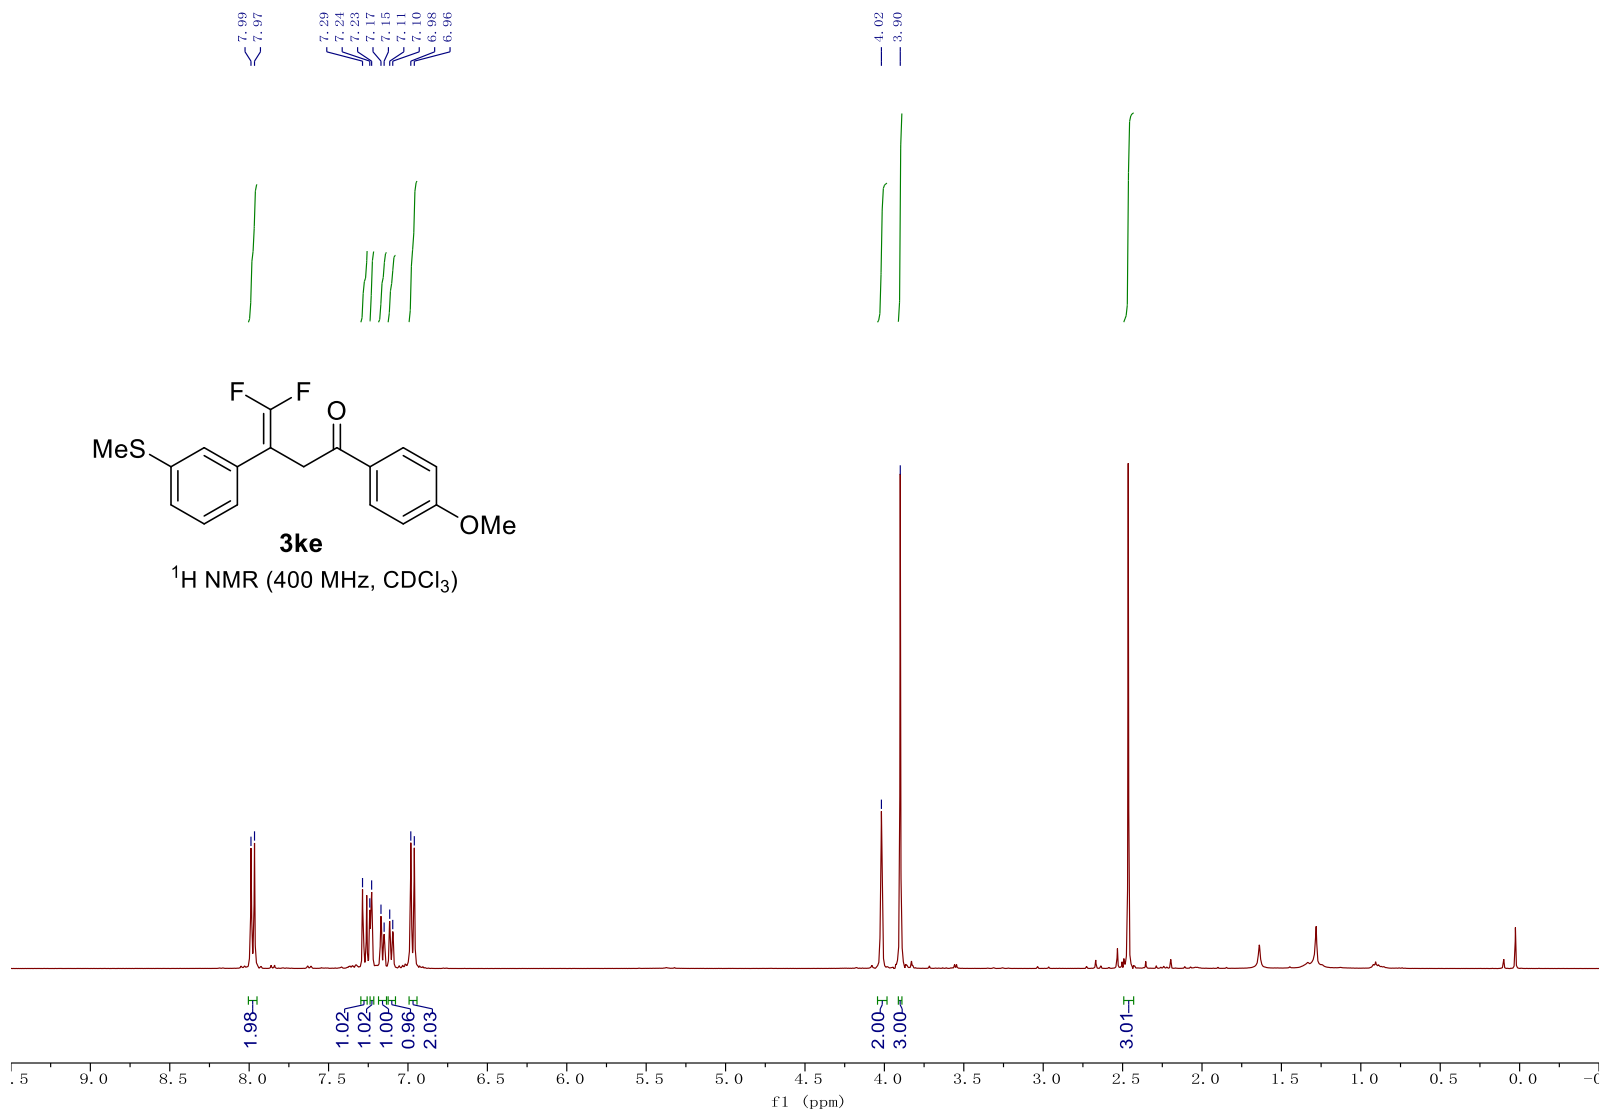

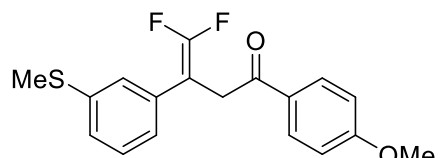

<sup>13</sup>C NMR (101 MHz, CDCl<sub>3</sub>)

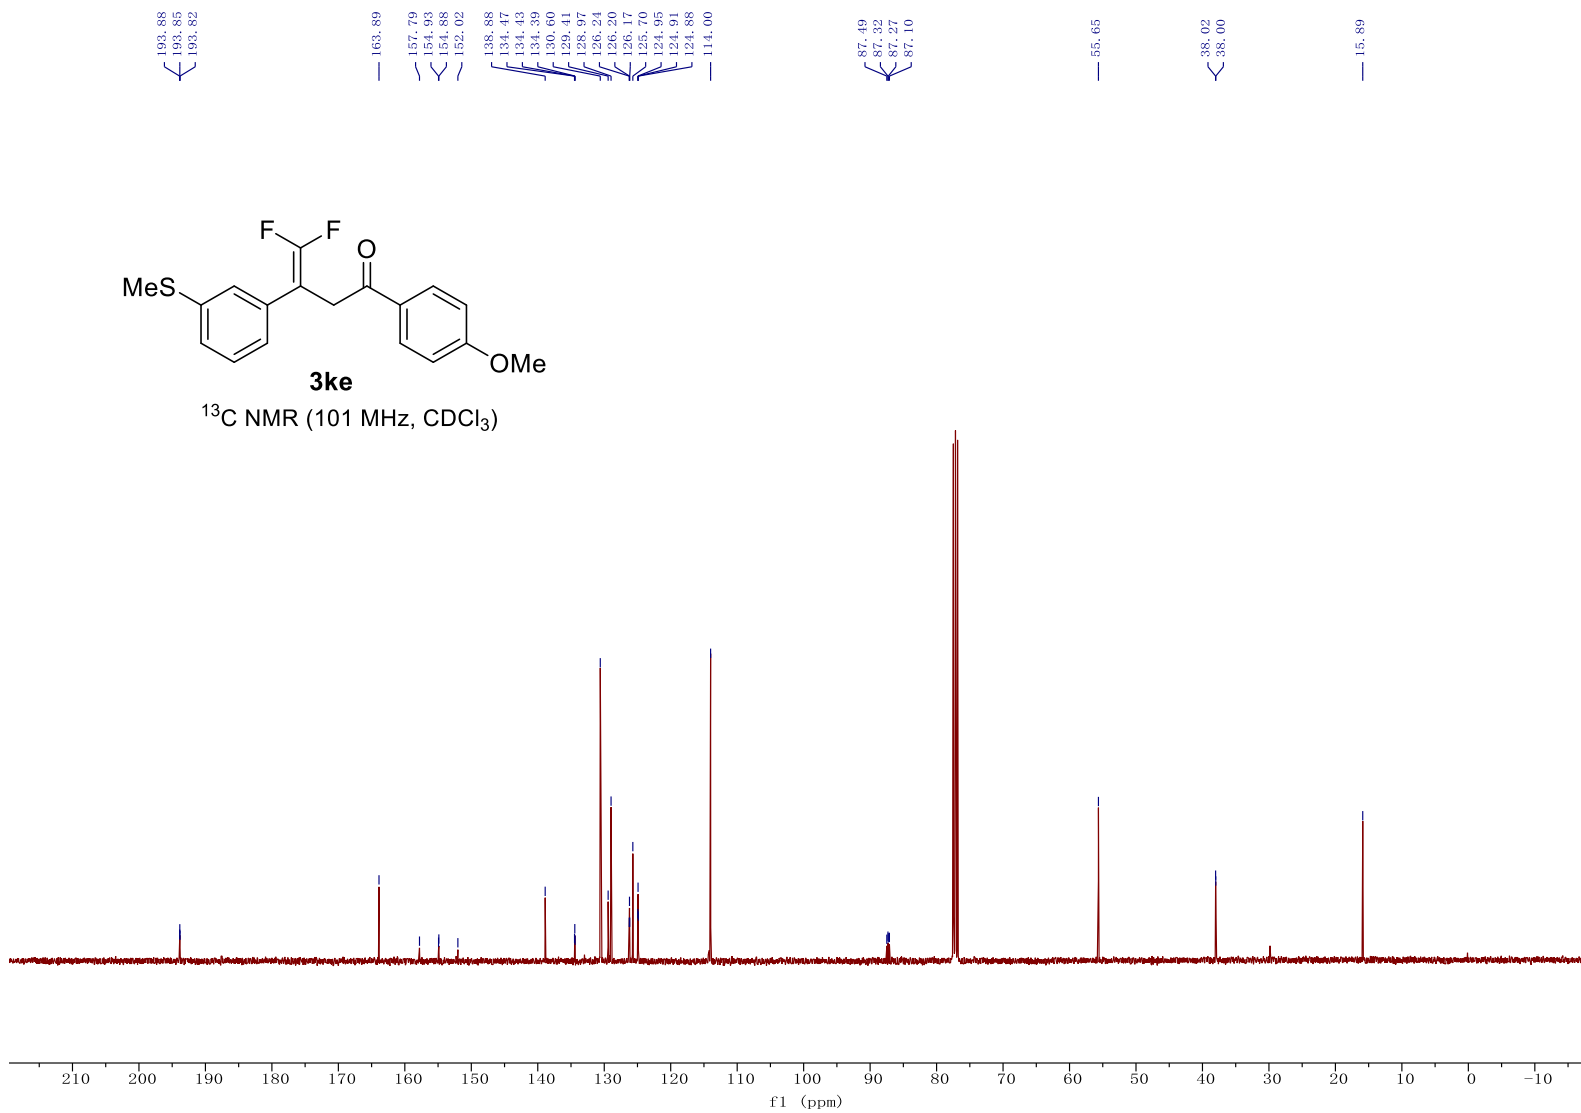

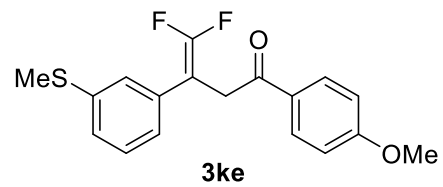

$^{19}\text{F}$  NMR (376 MHz,  $\text{CDCl}_3$ )

-87.72  
-87.82  
-88.43  
-88.52

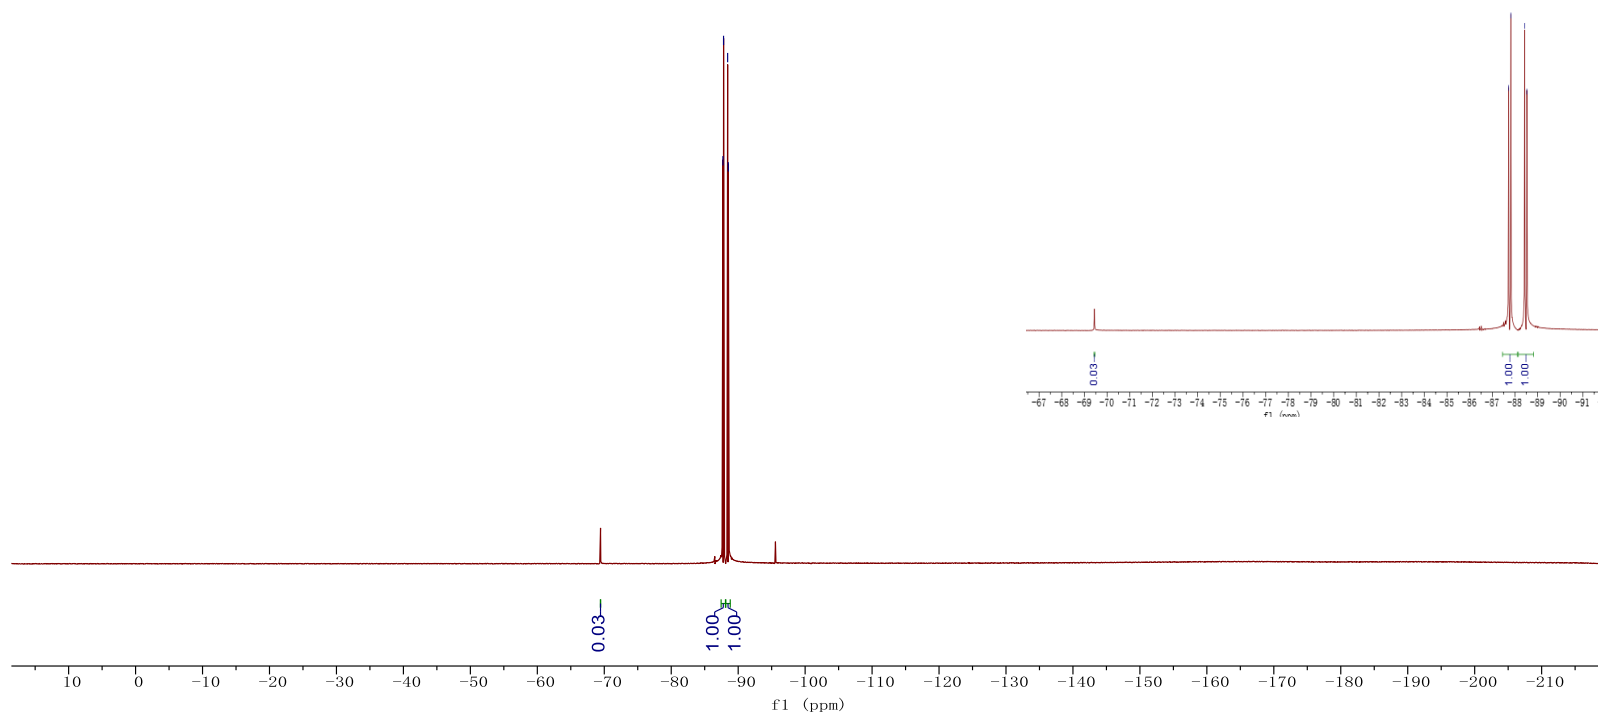

S107

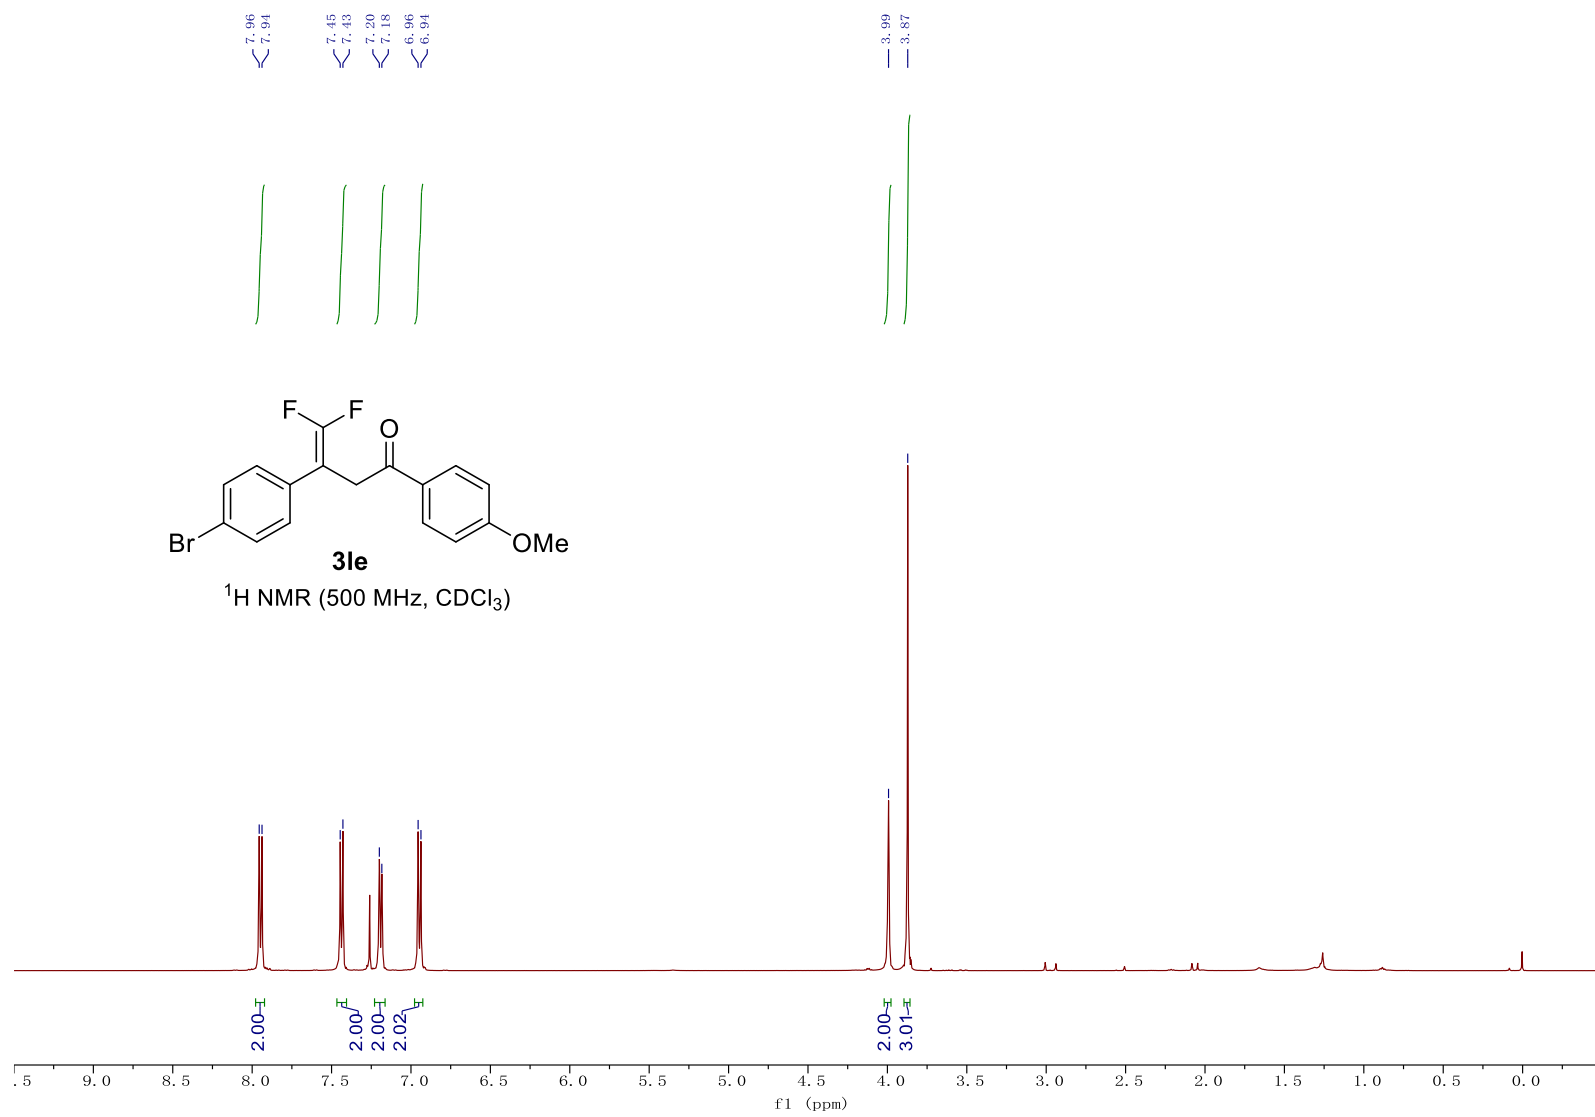



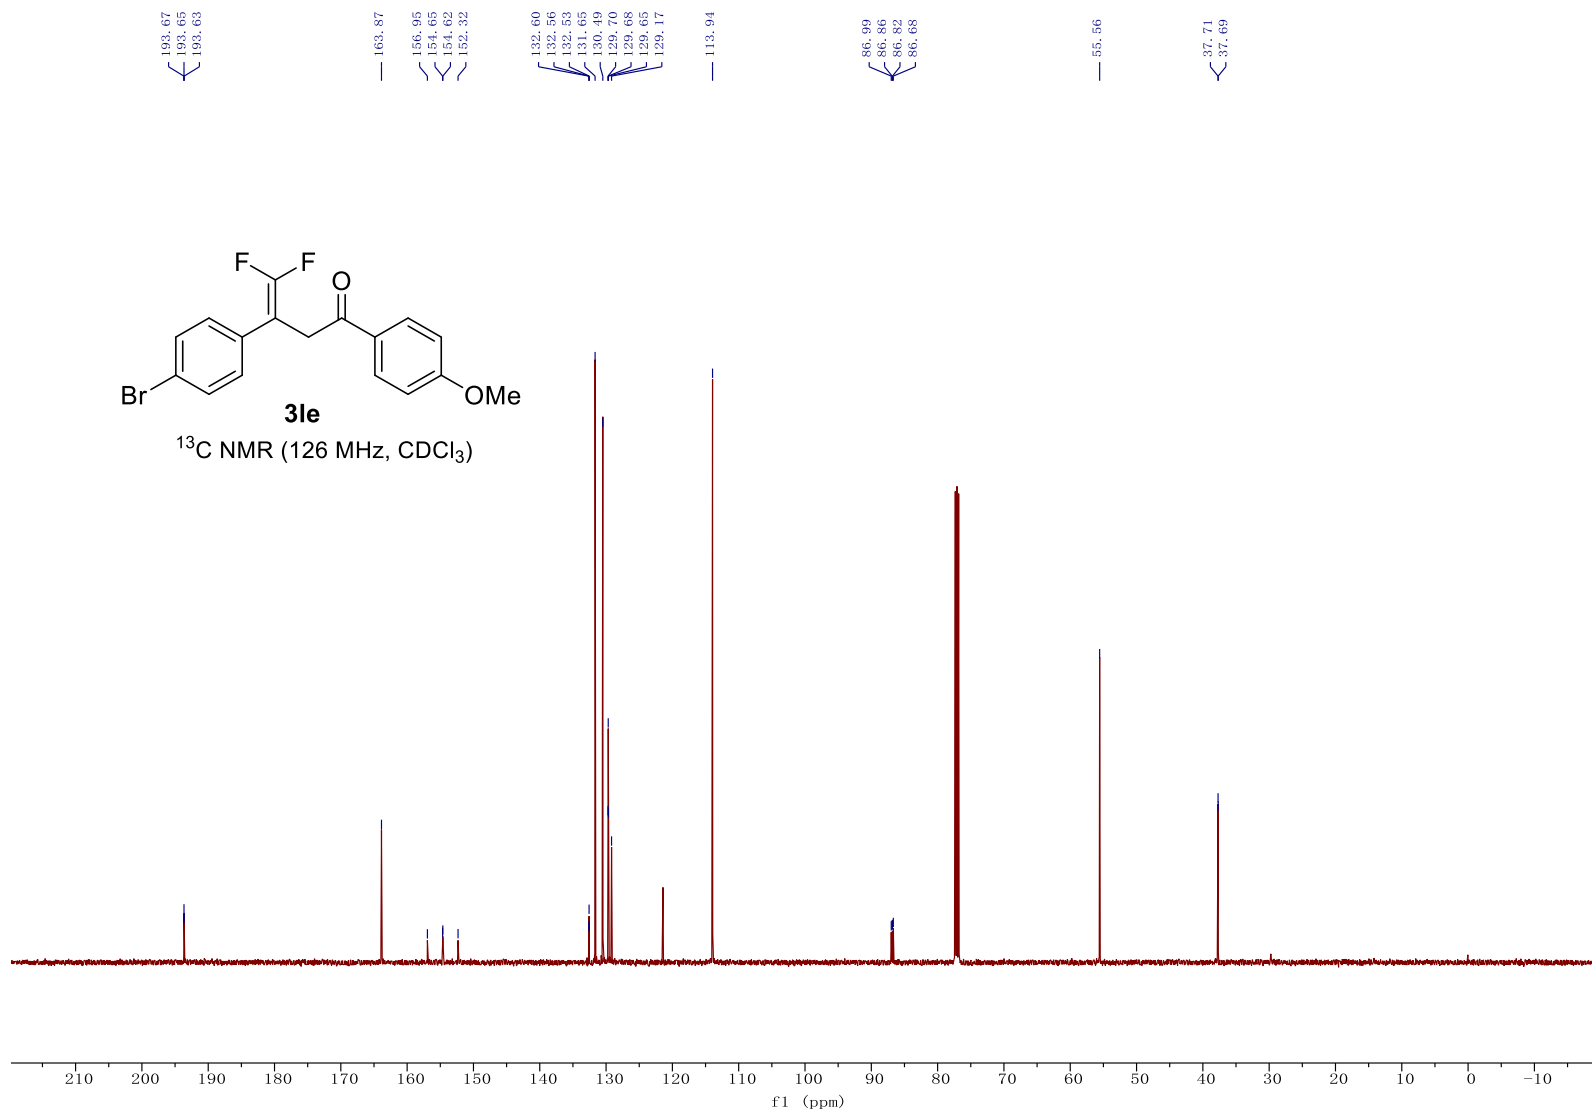

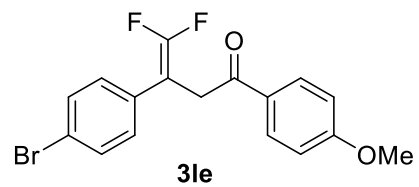

$^{19}\text{F}$  NMR (471 MHz,  $\text{CDCl}_3$ )

-87.40  
-87.48  
-88.29  
-88.37

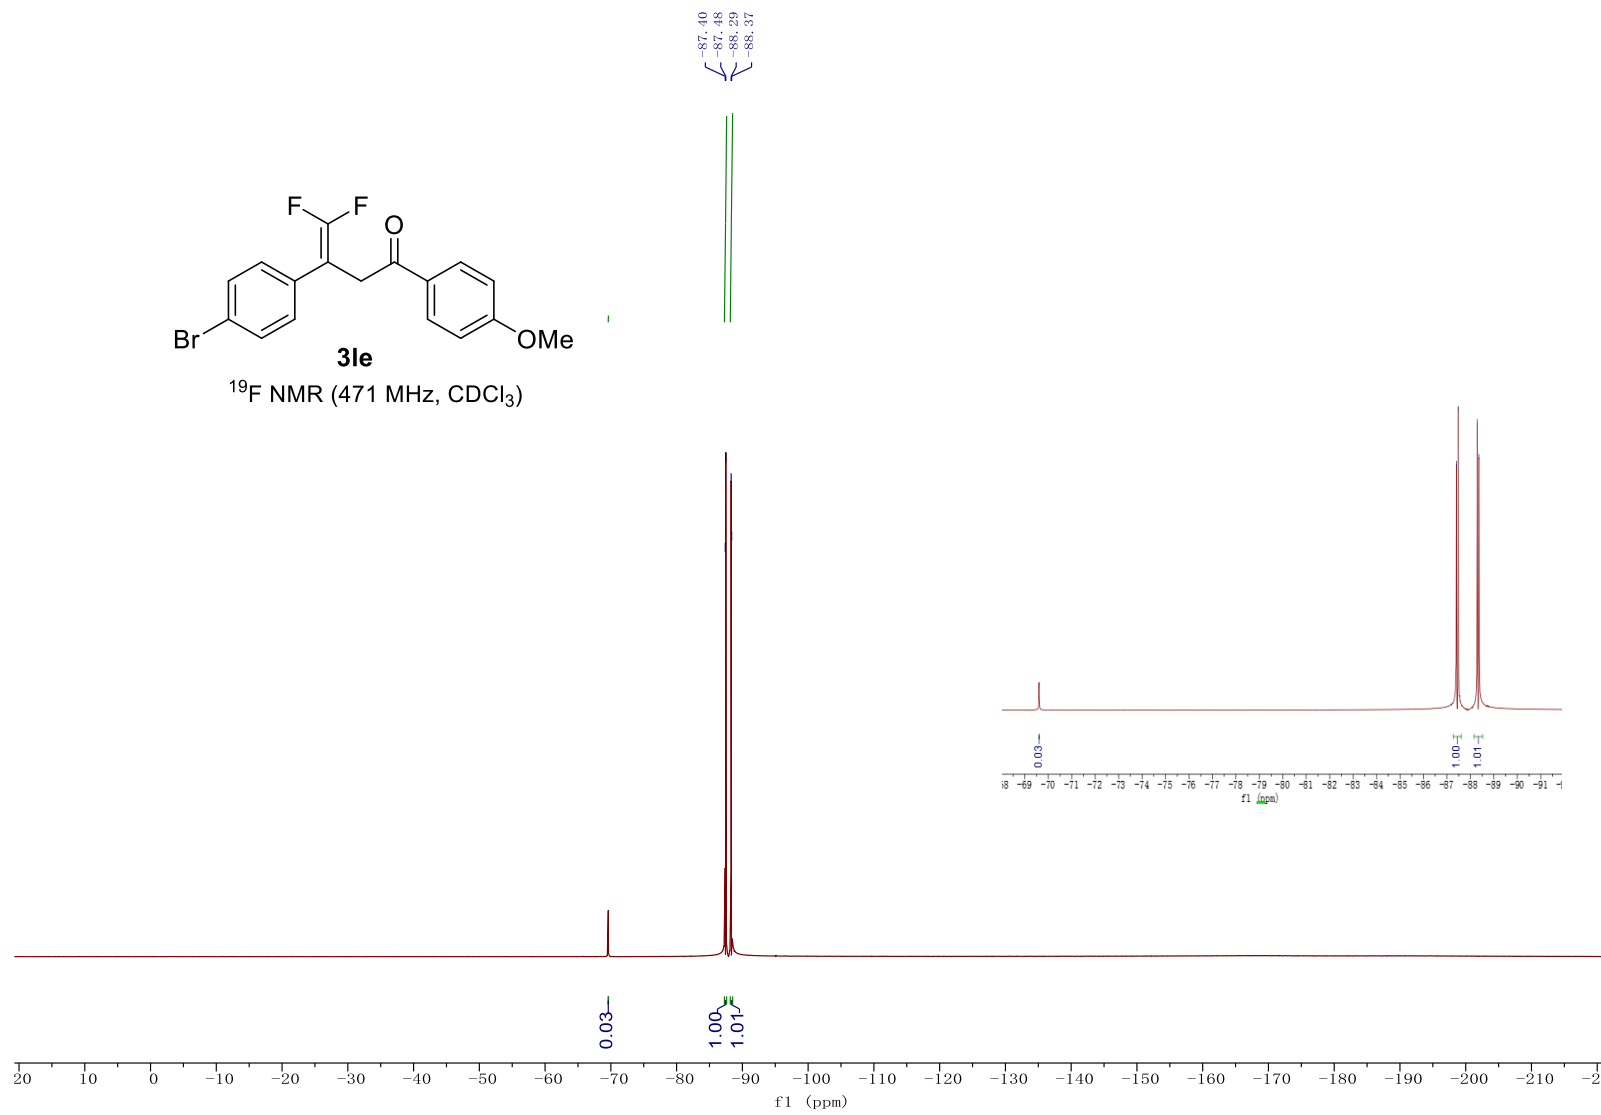

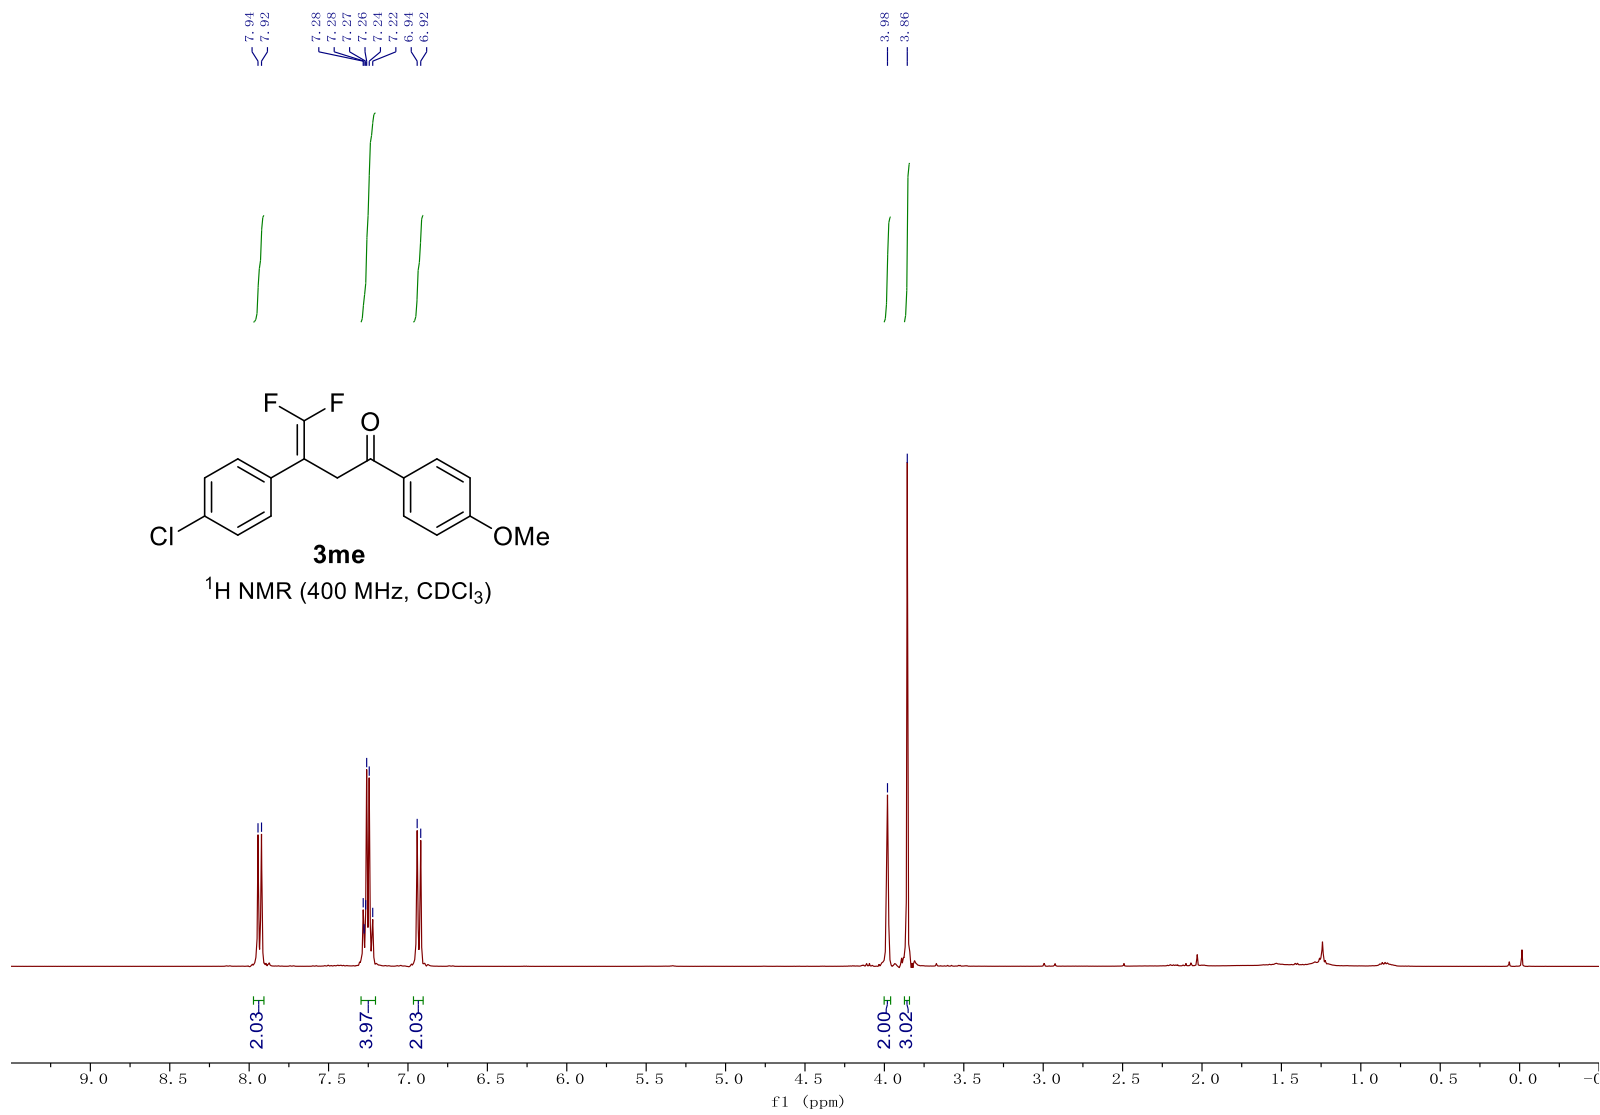

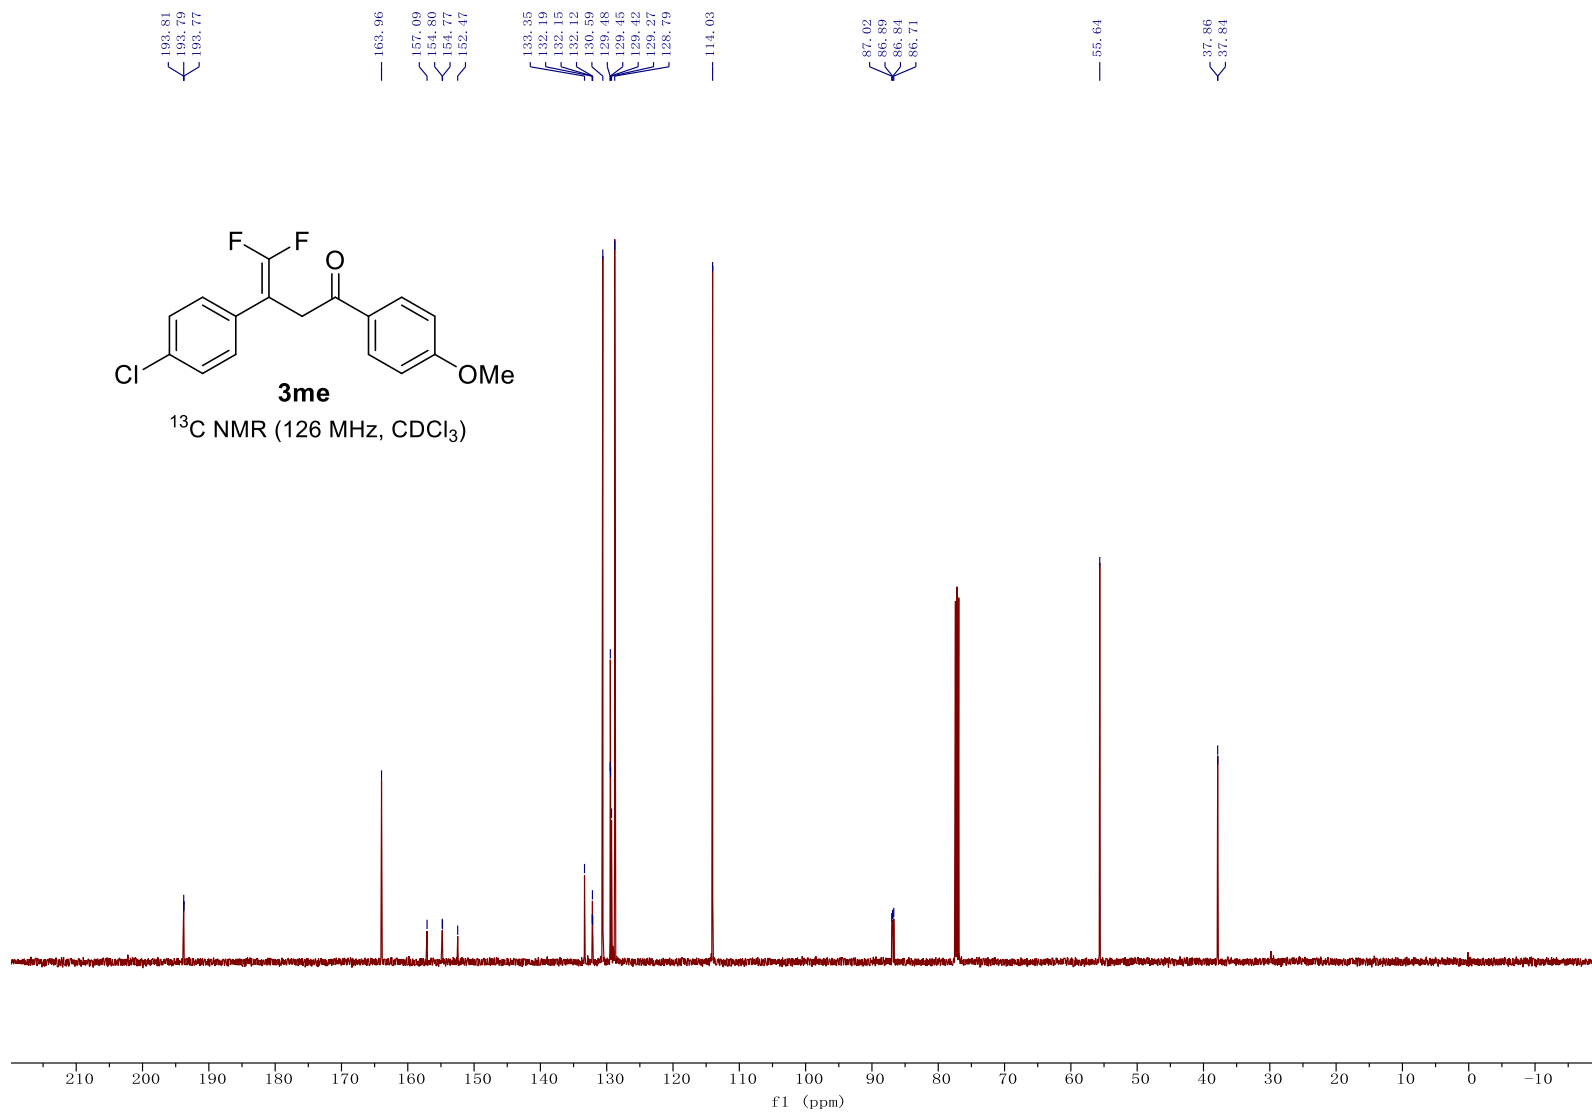

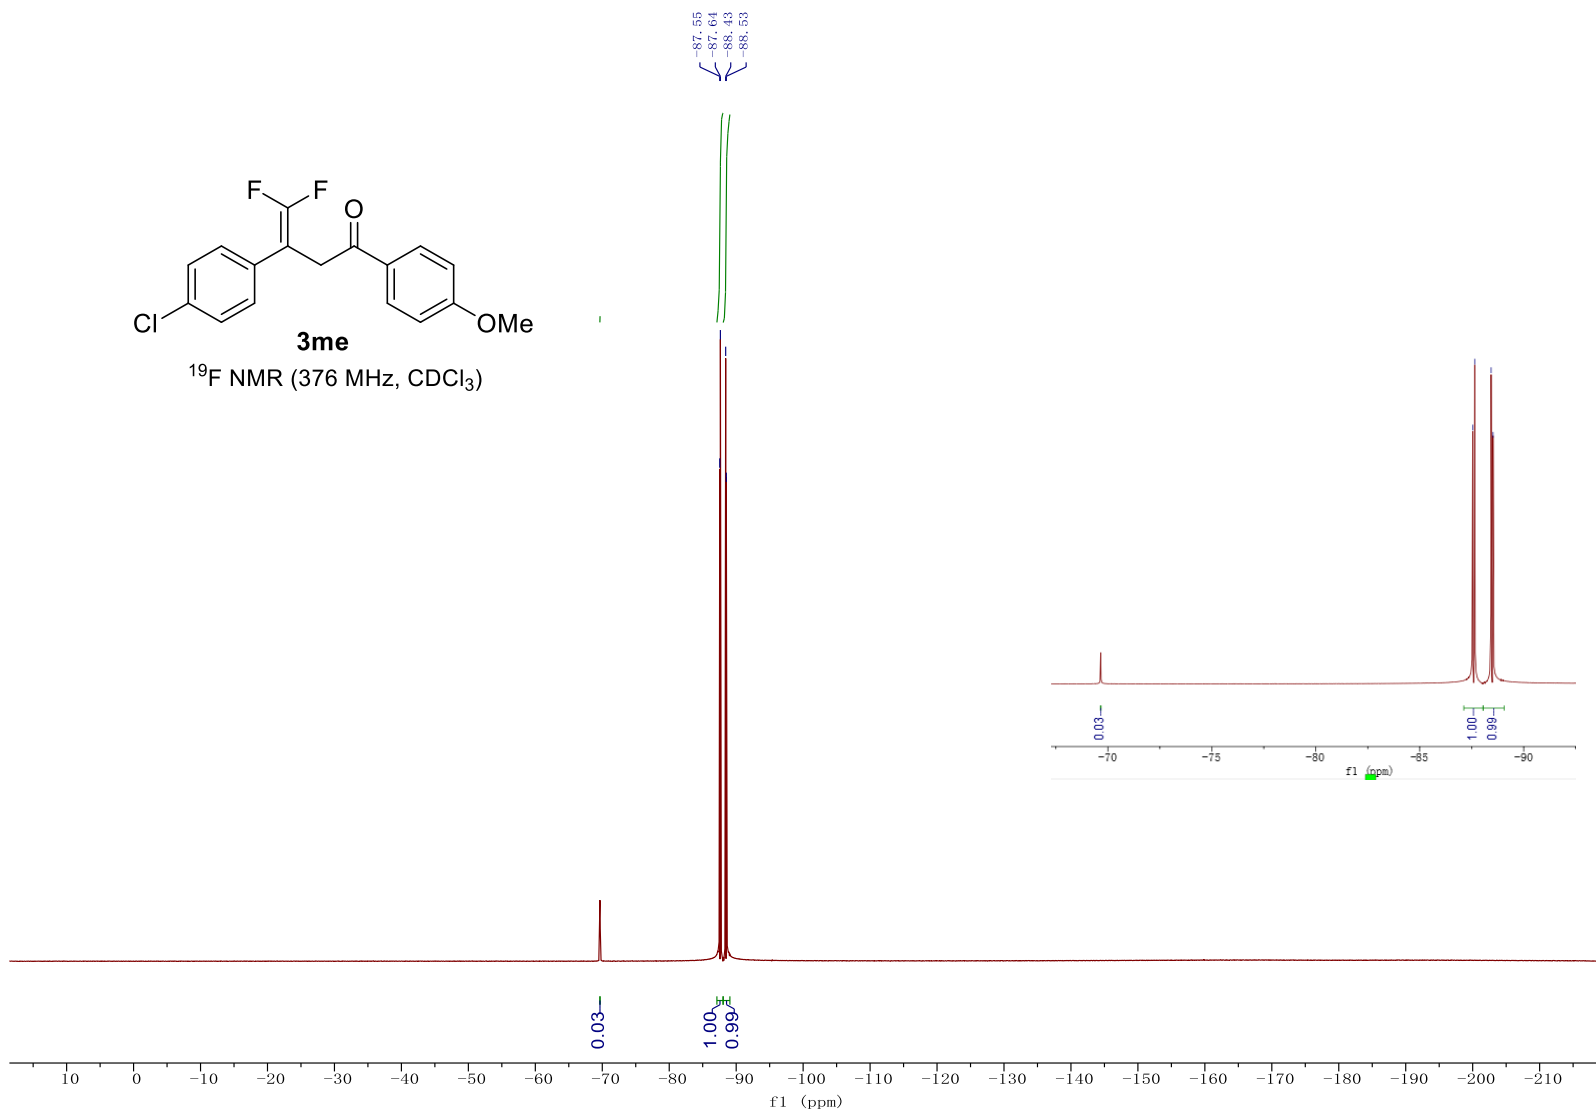

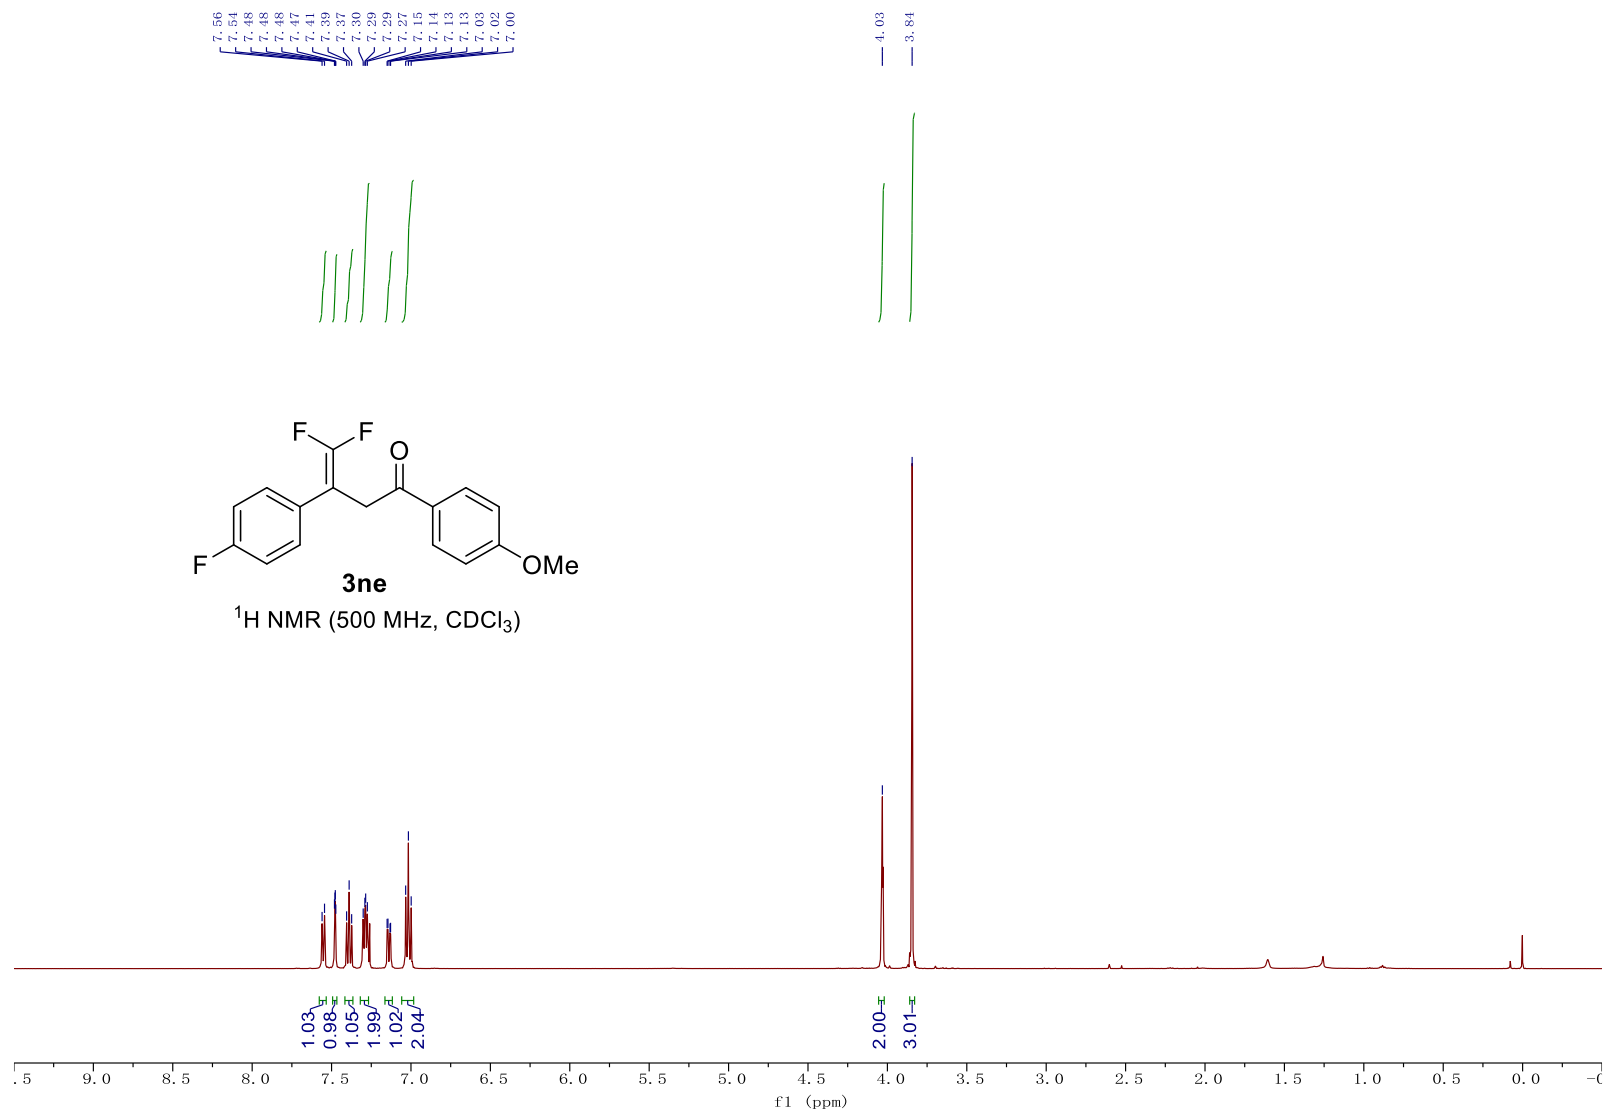

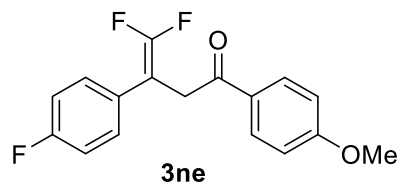

$^{13}\text{C}$  NMR (126 MHz,  $\text{CDCl}_3$ )

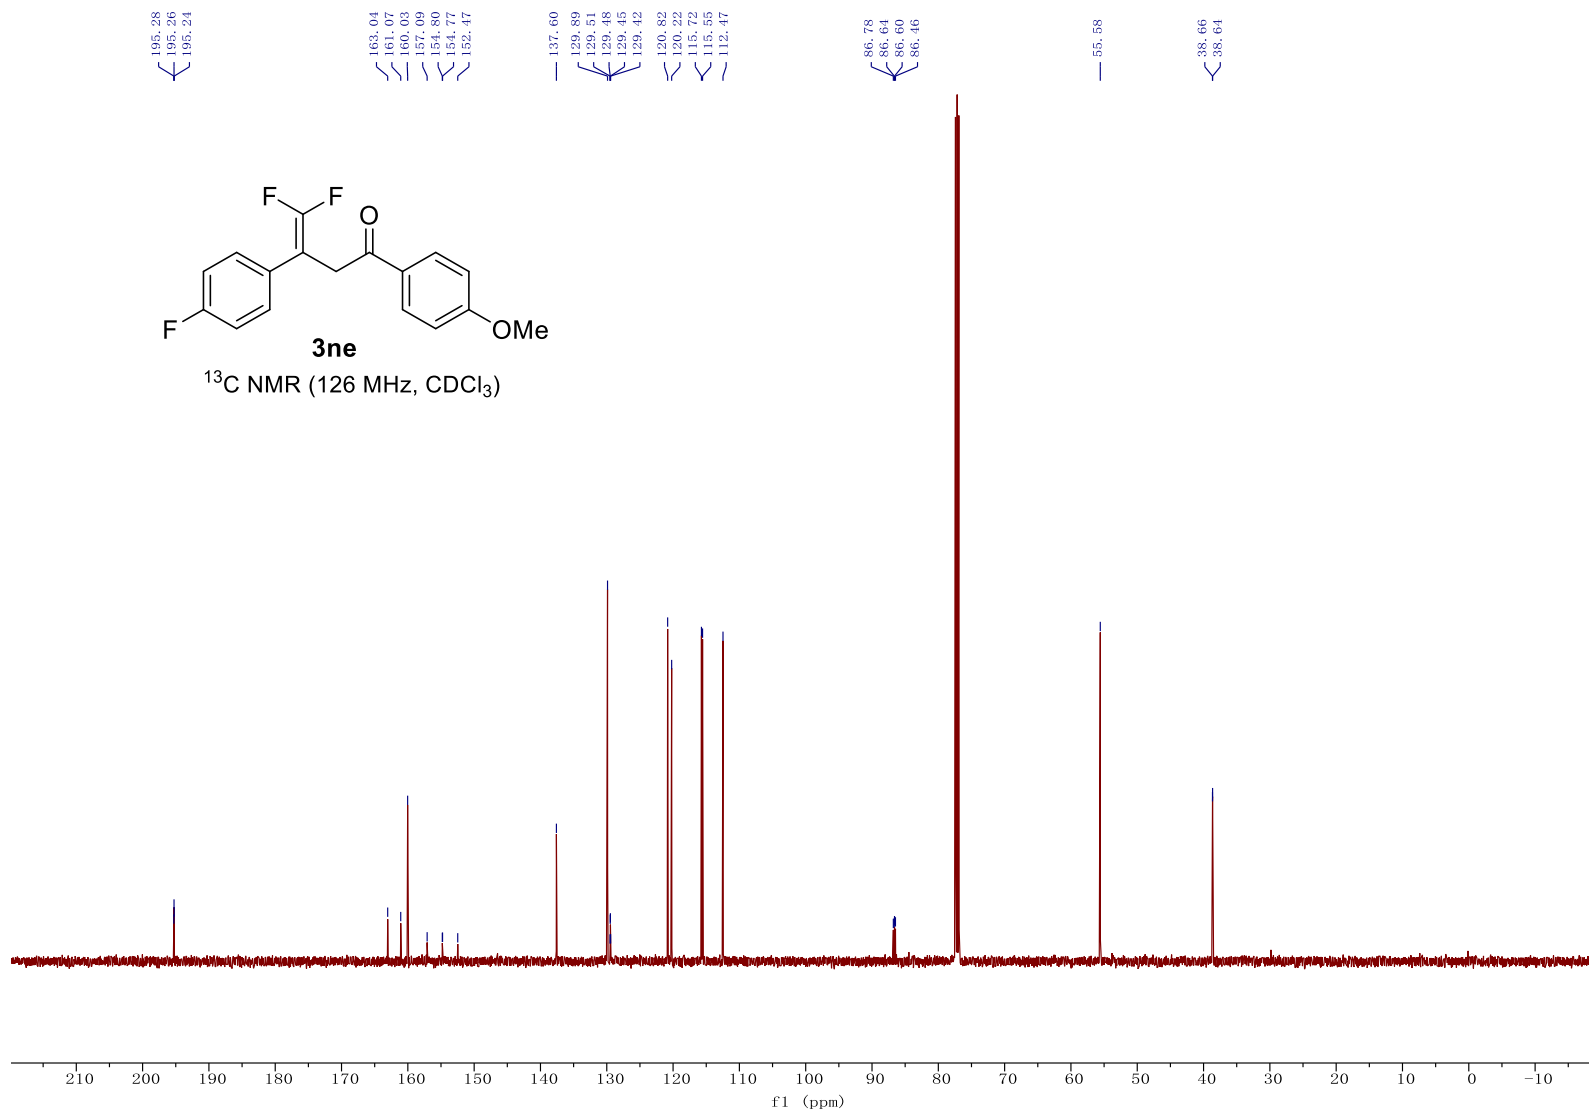

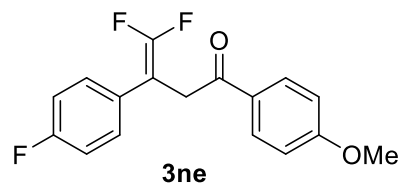

<sup>19</sup>F NMR (471 MHz, CDCl<sub>3</sub>)

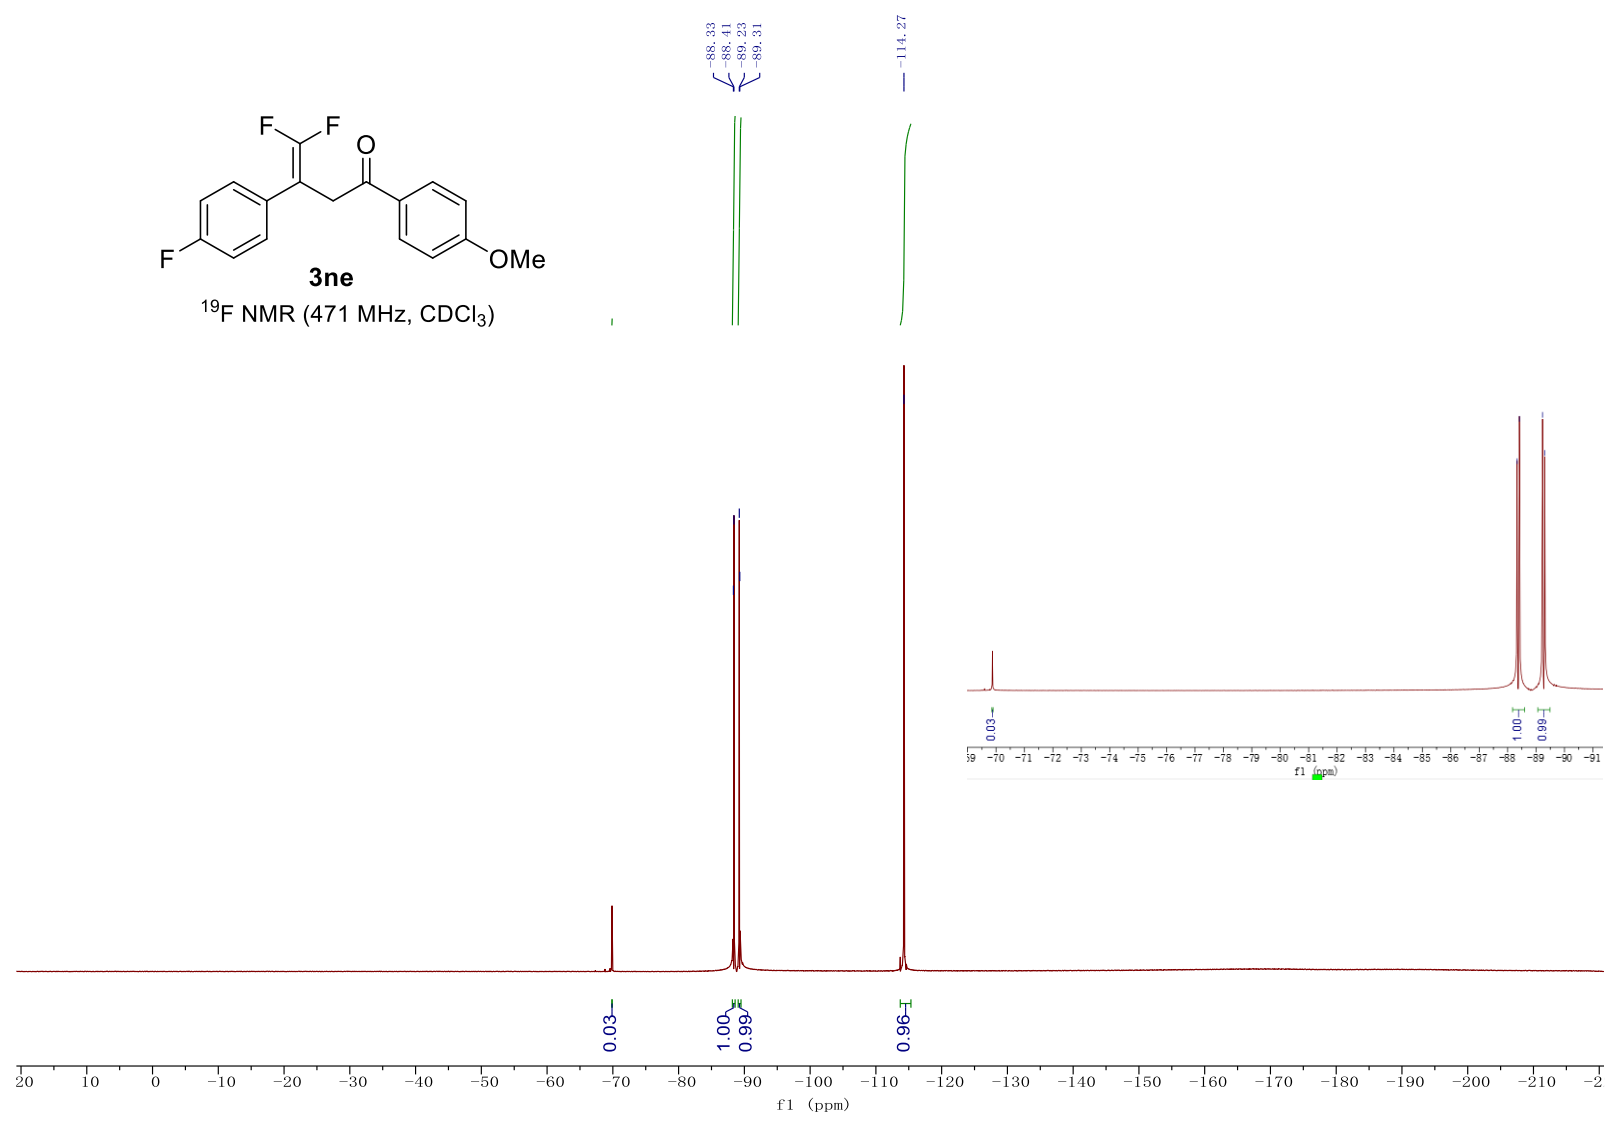



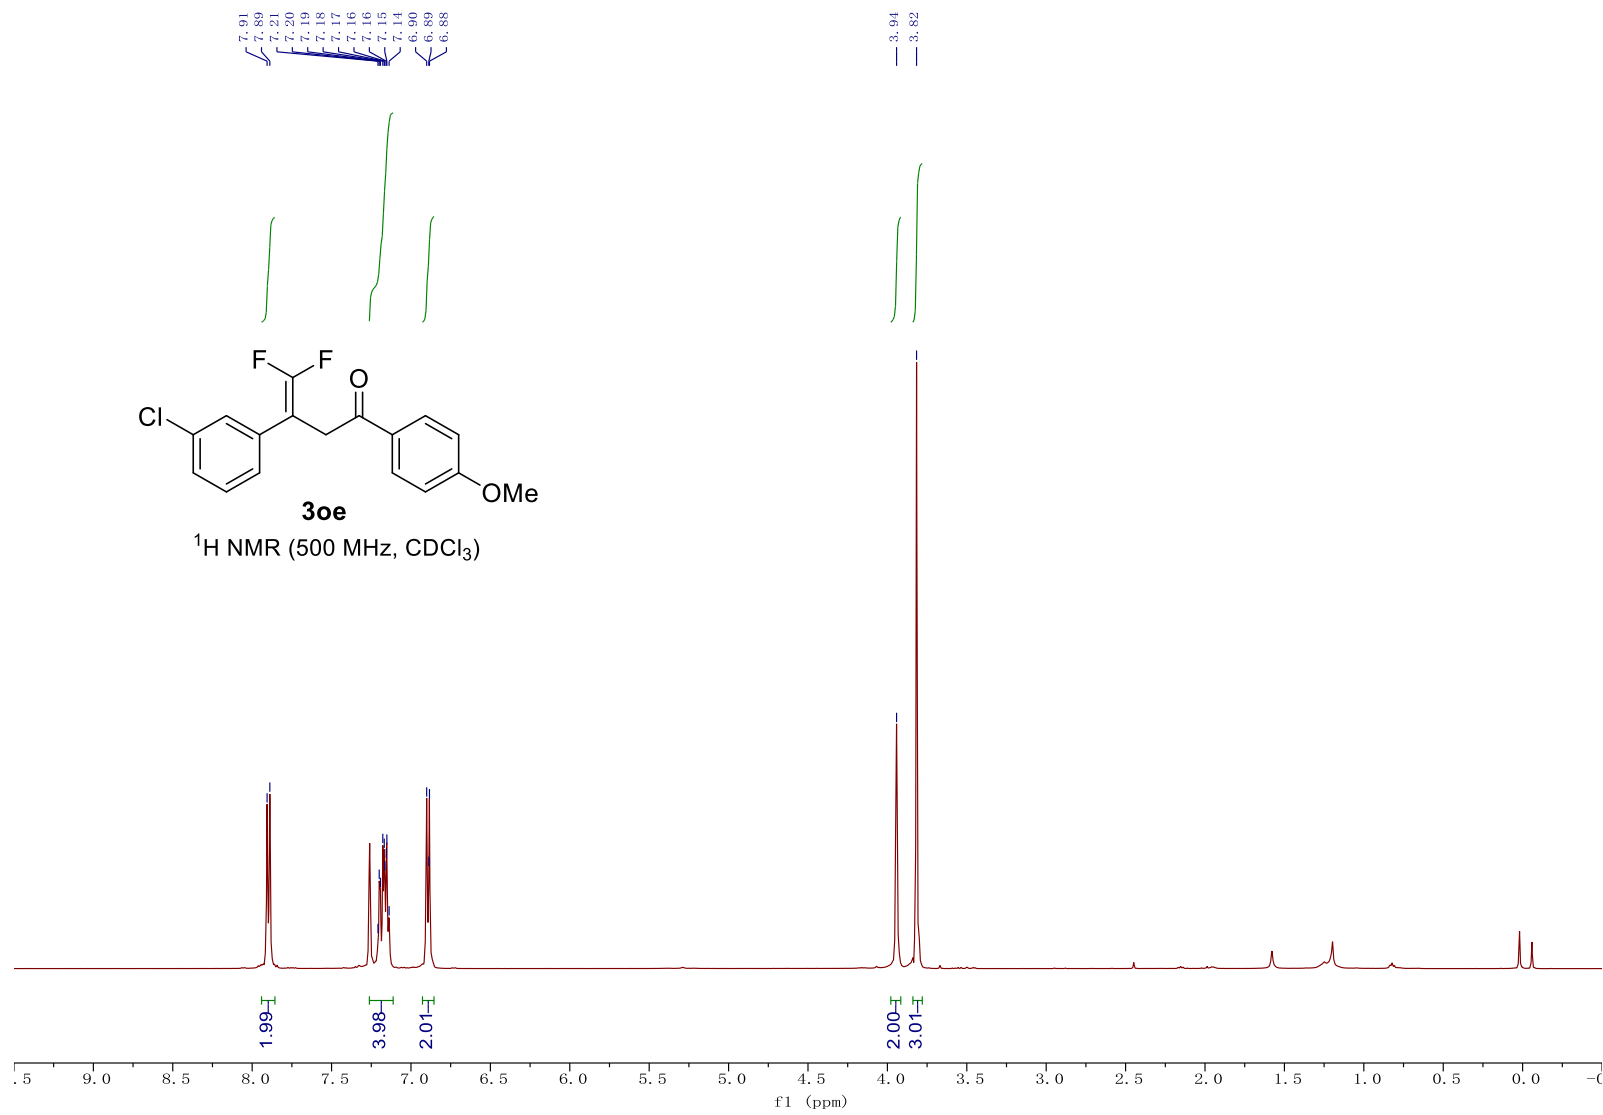

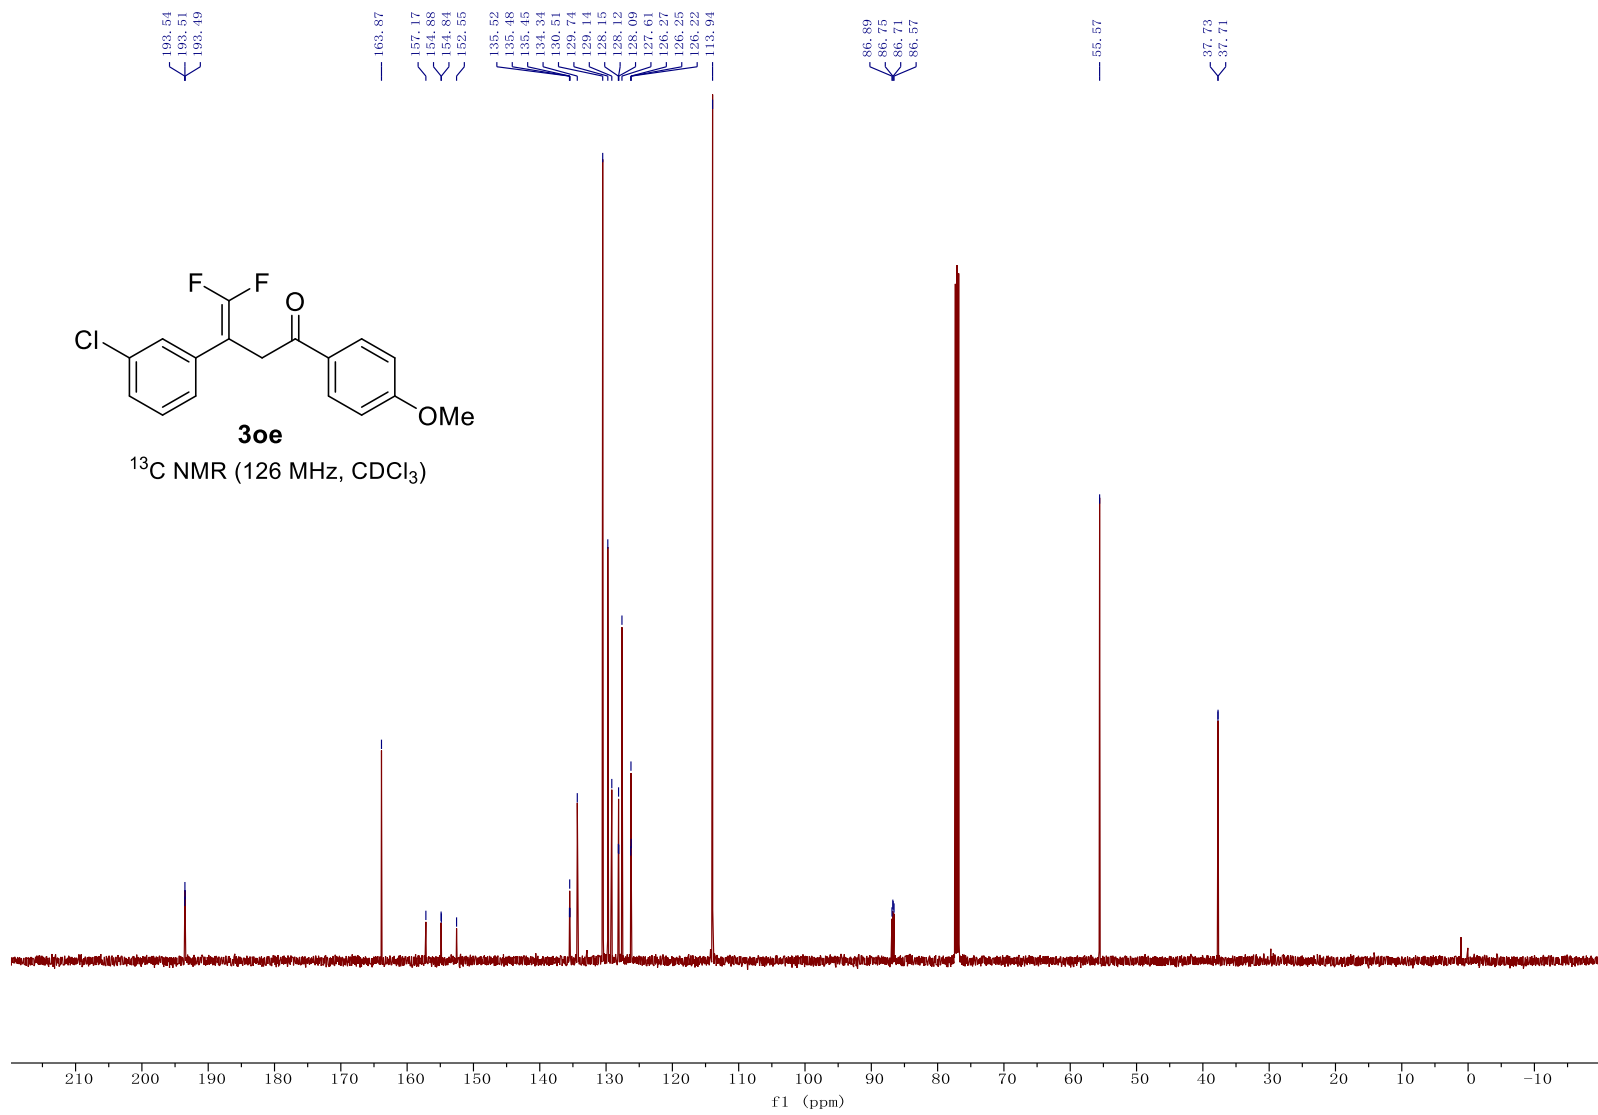

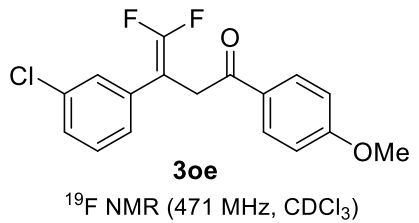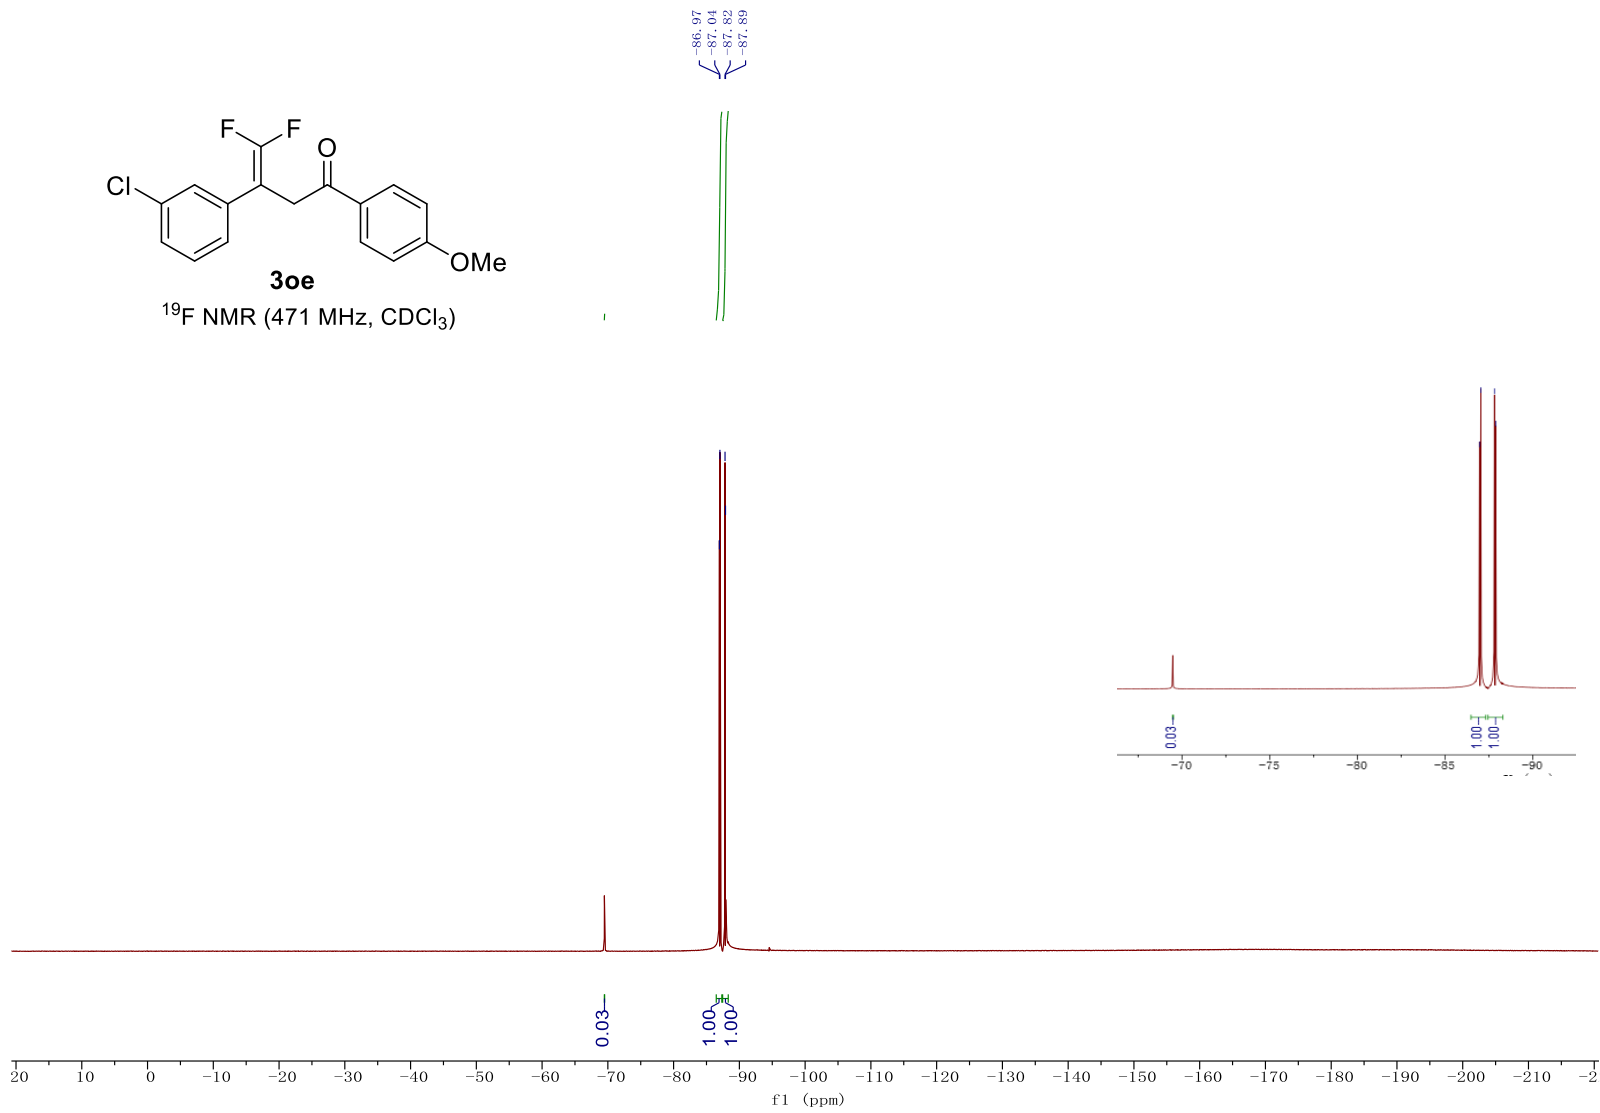

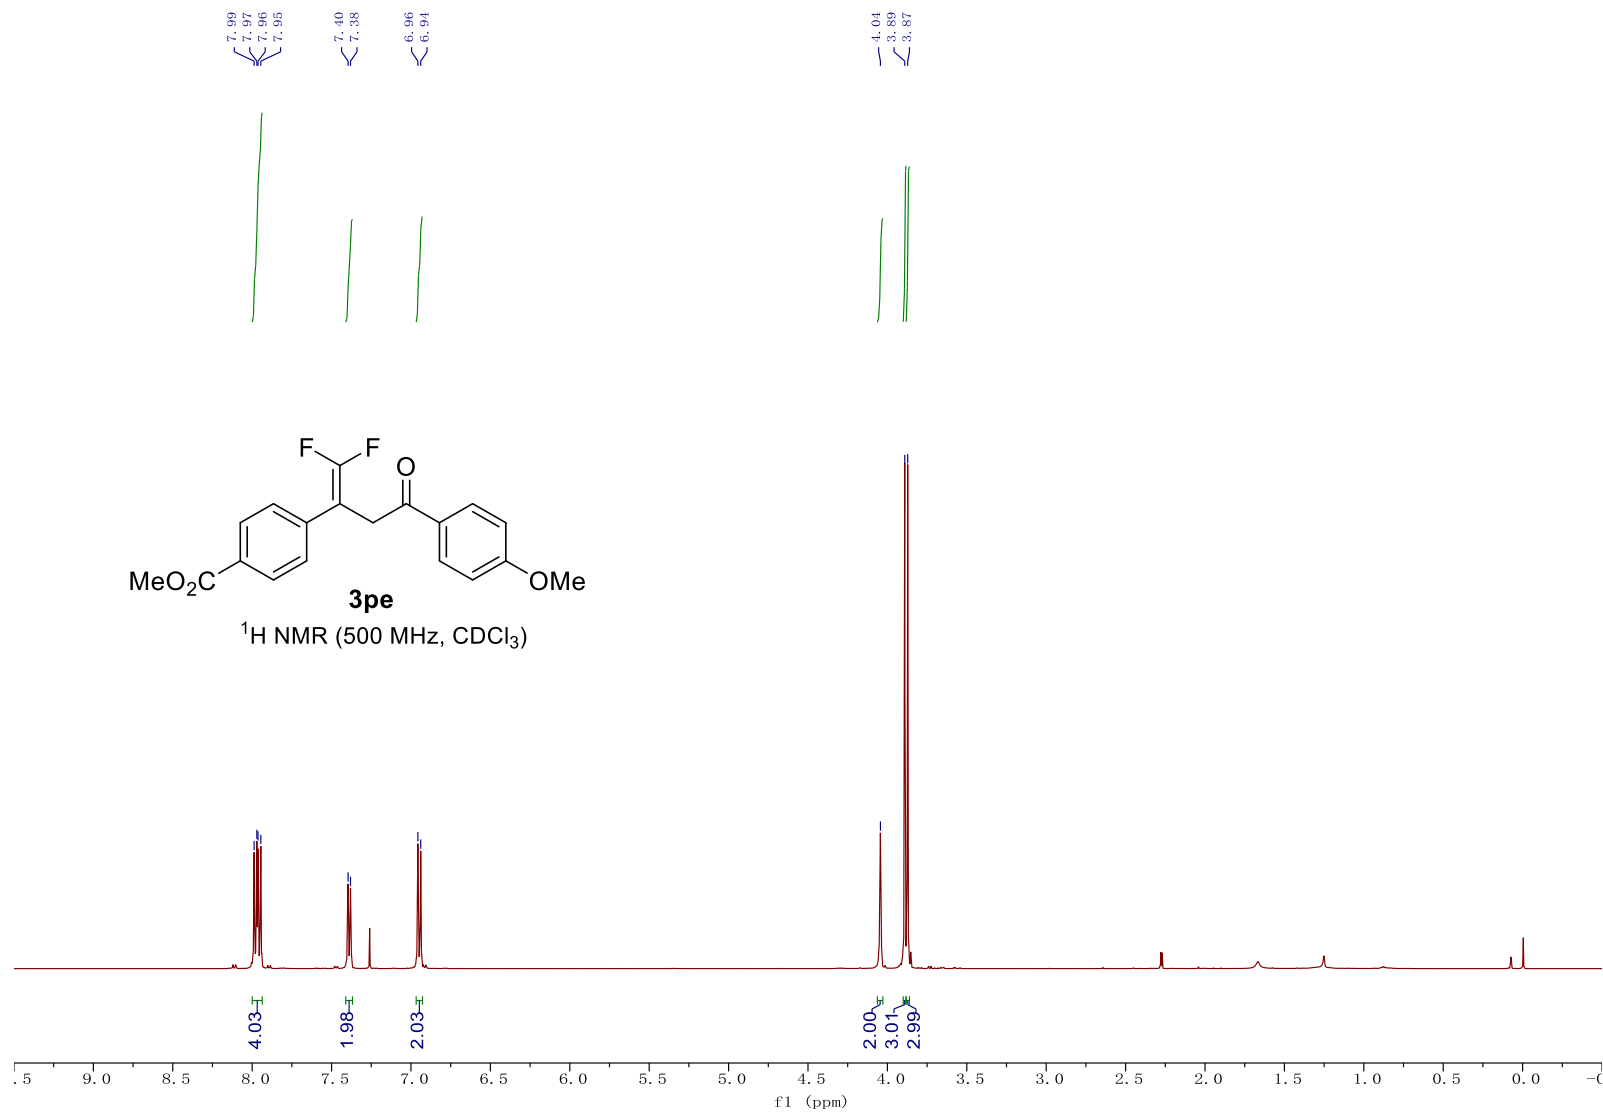

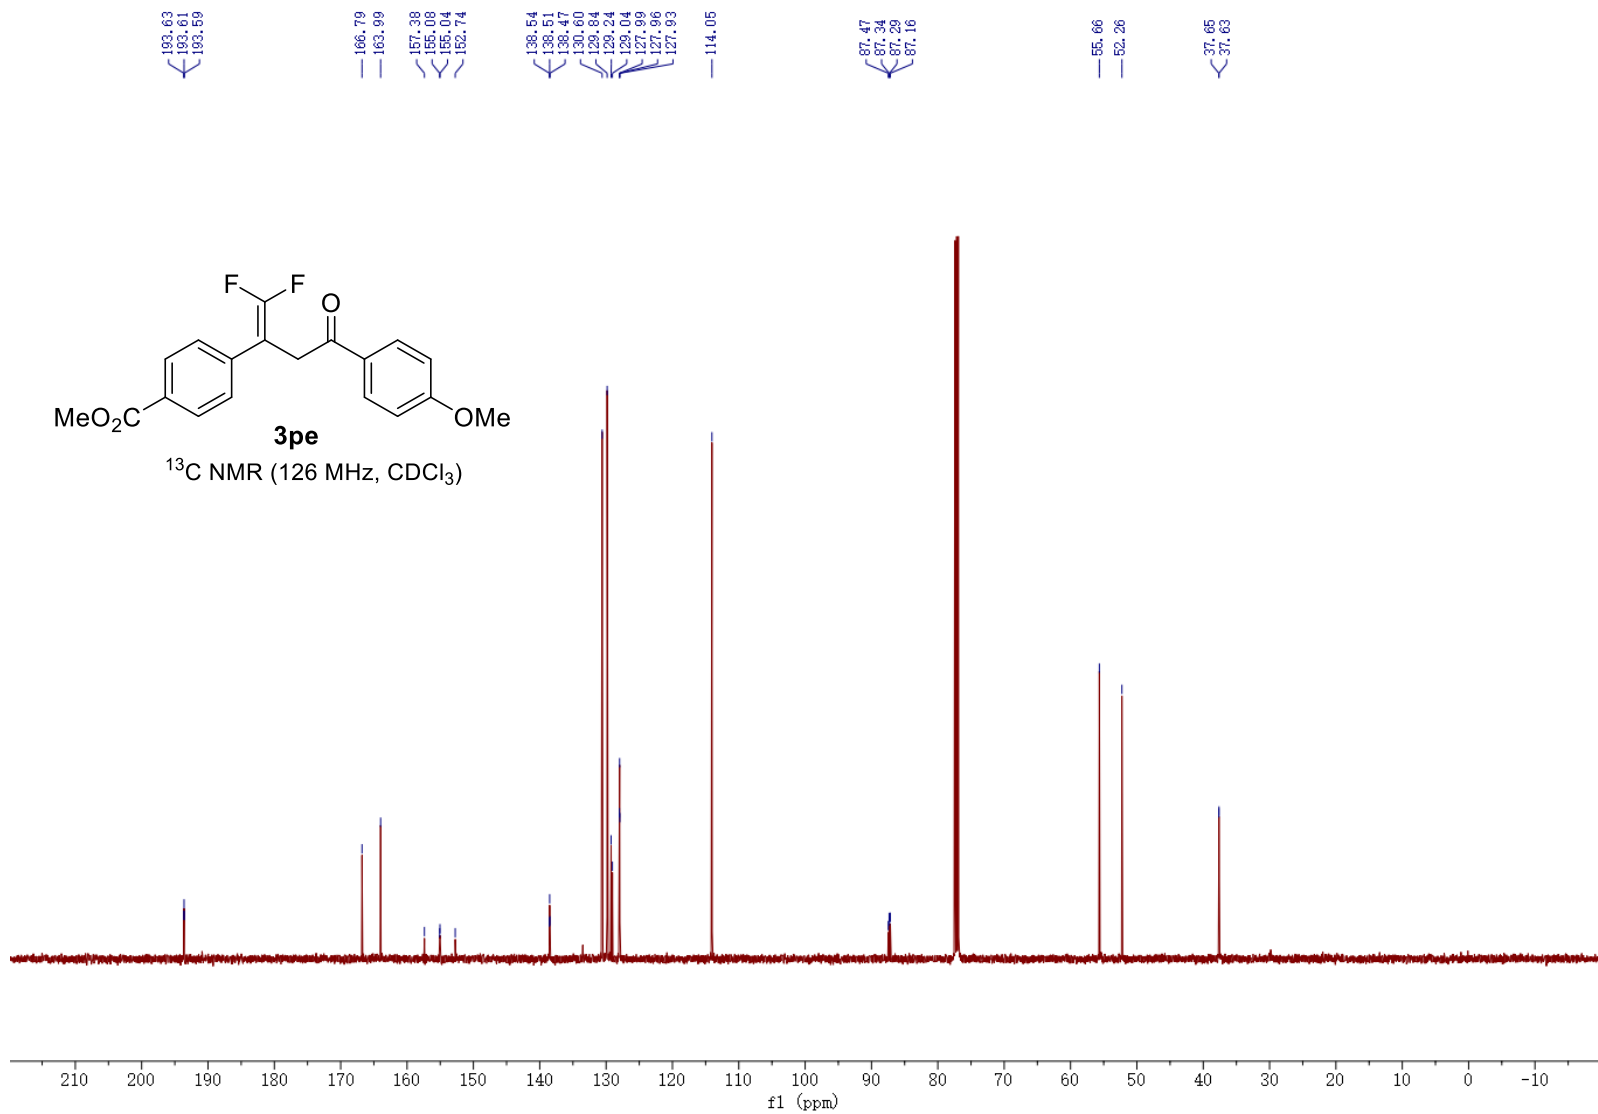

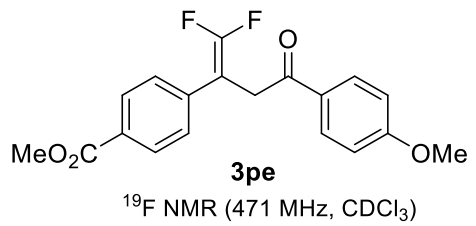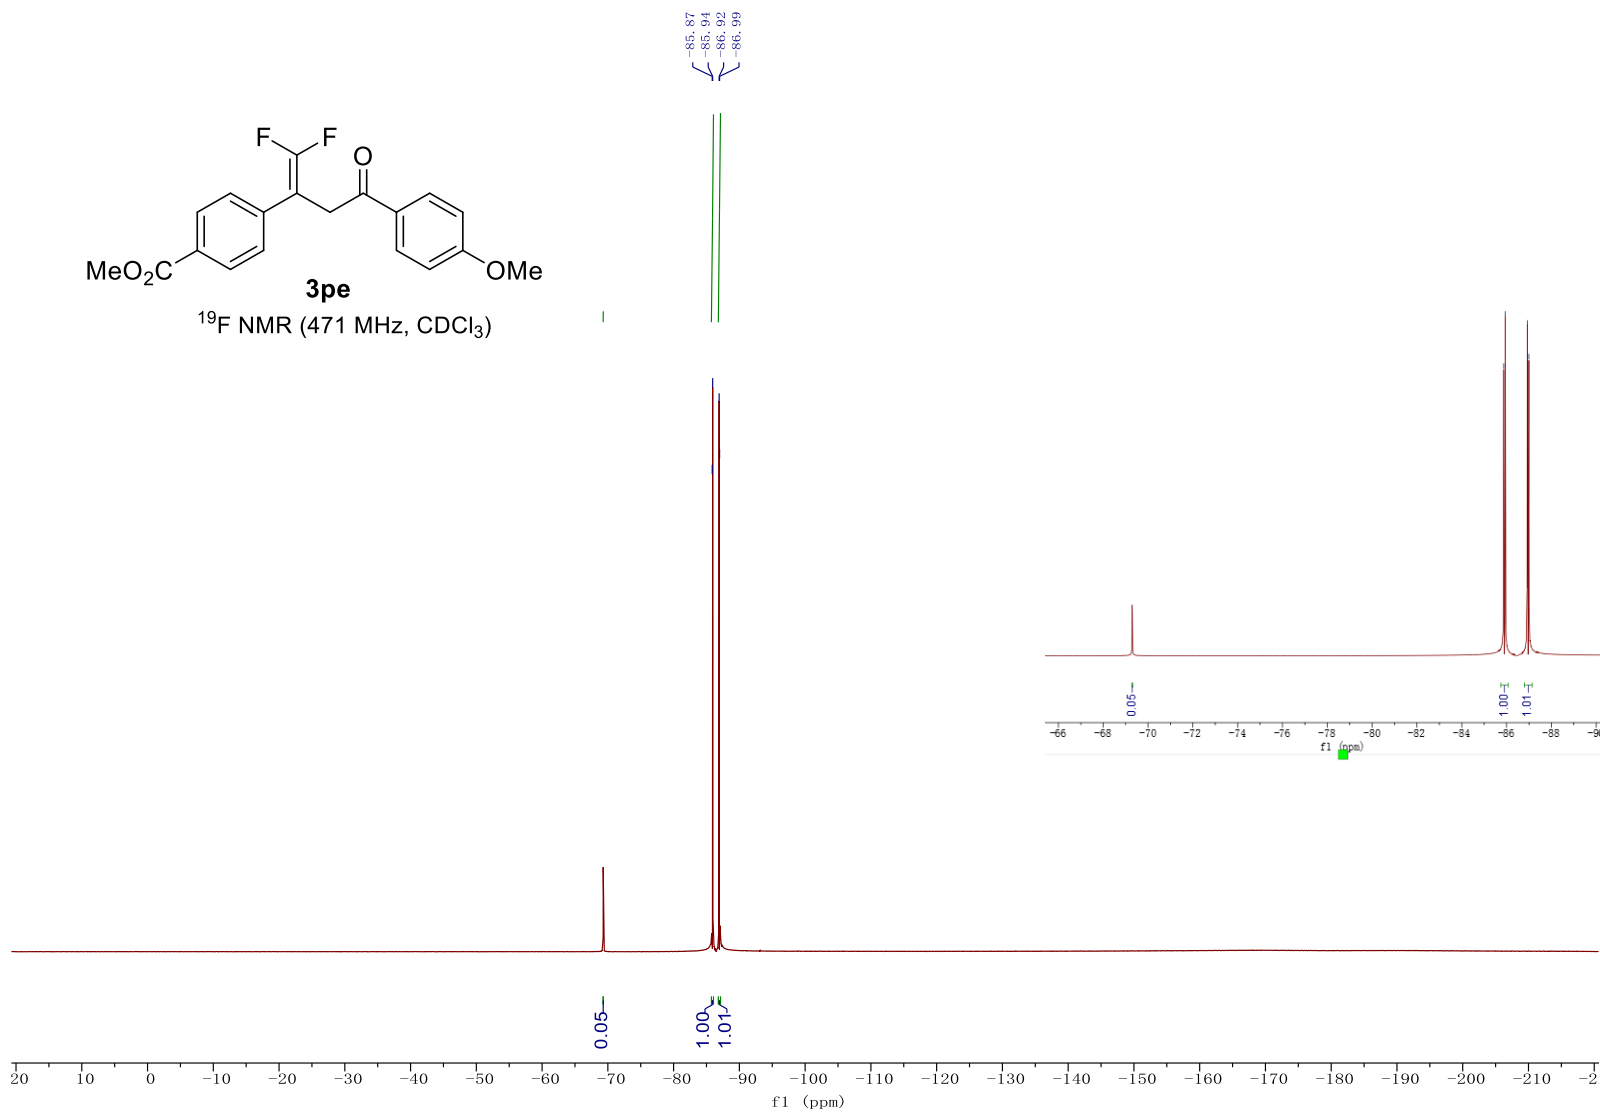

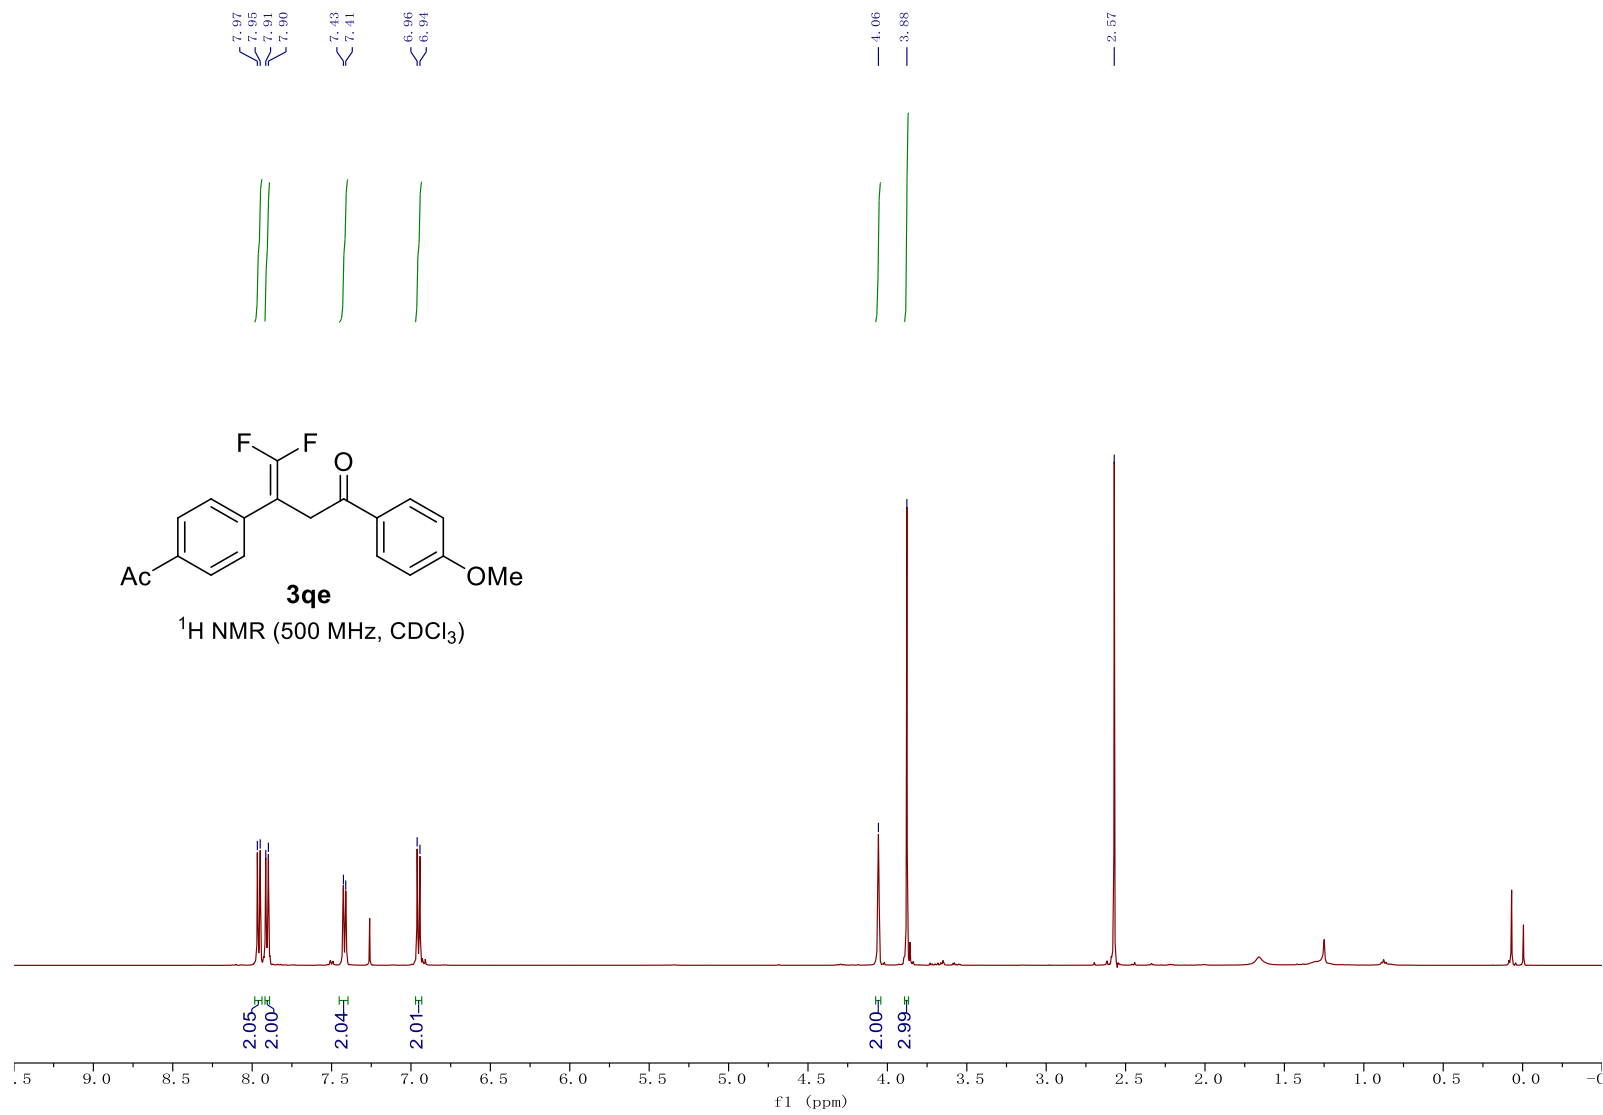

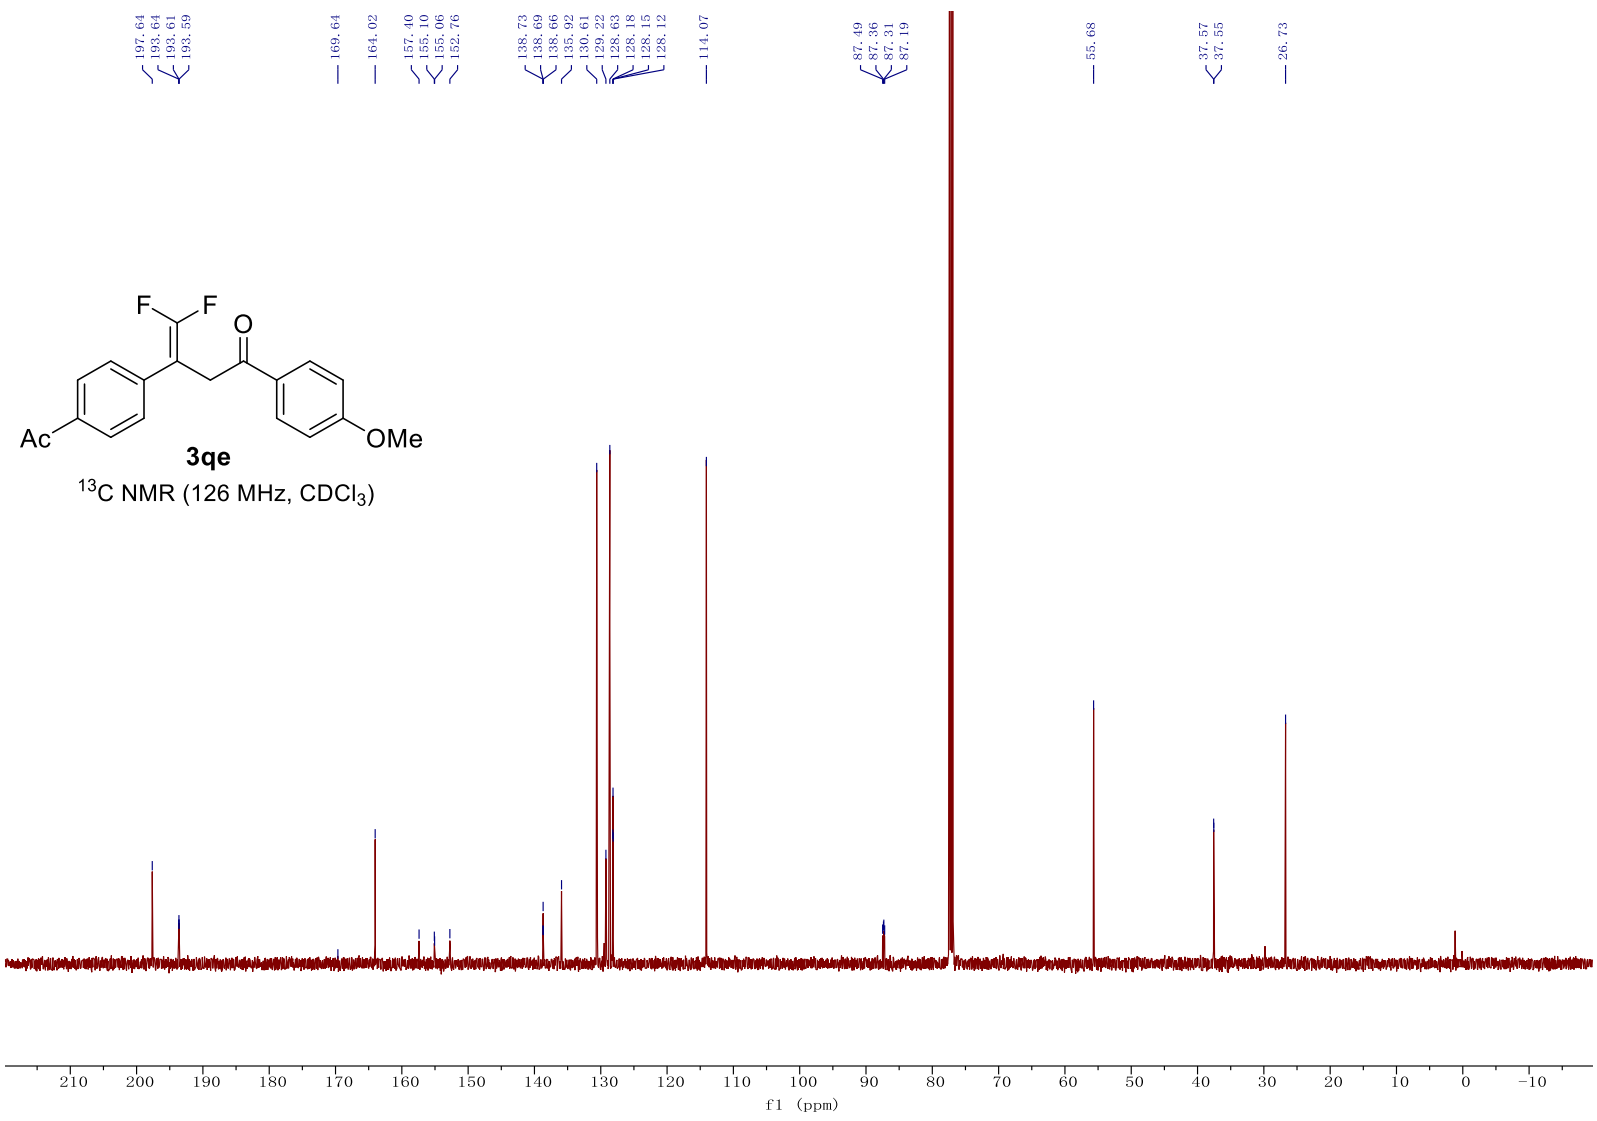



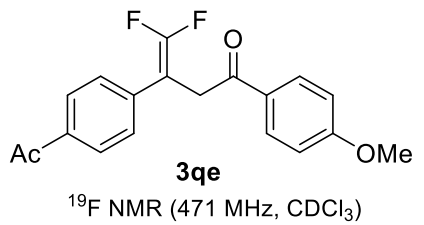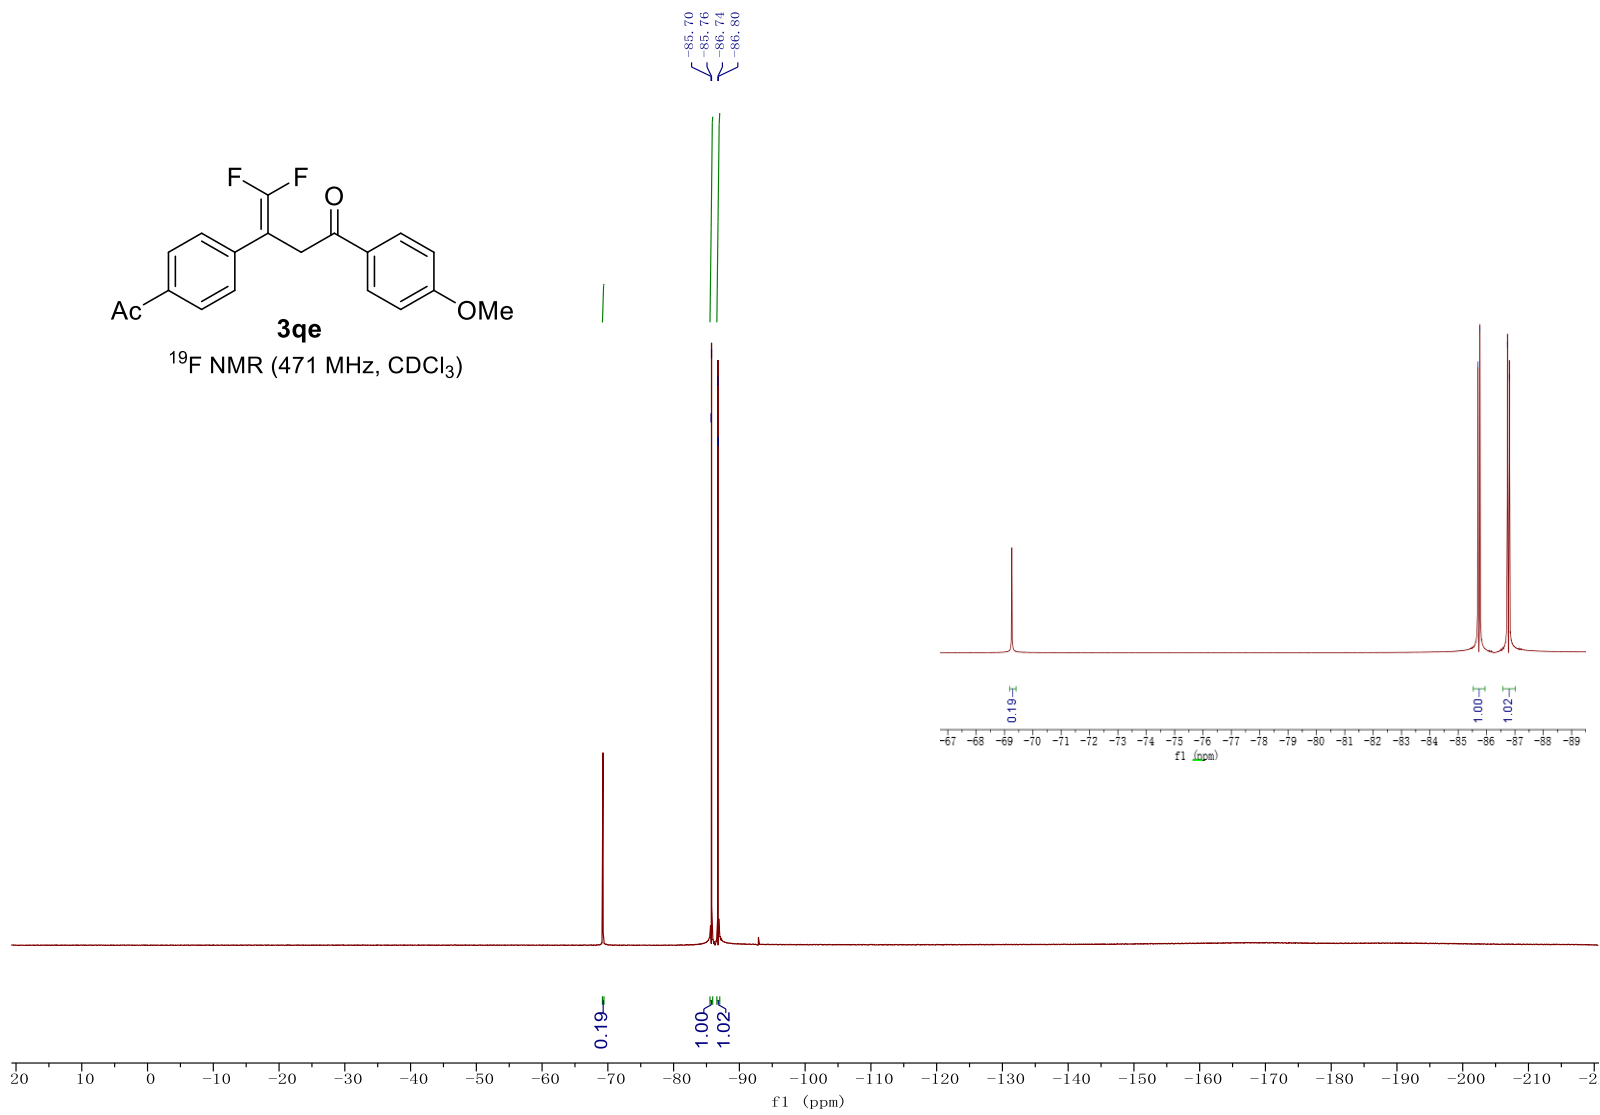

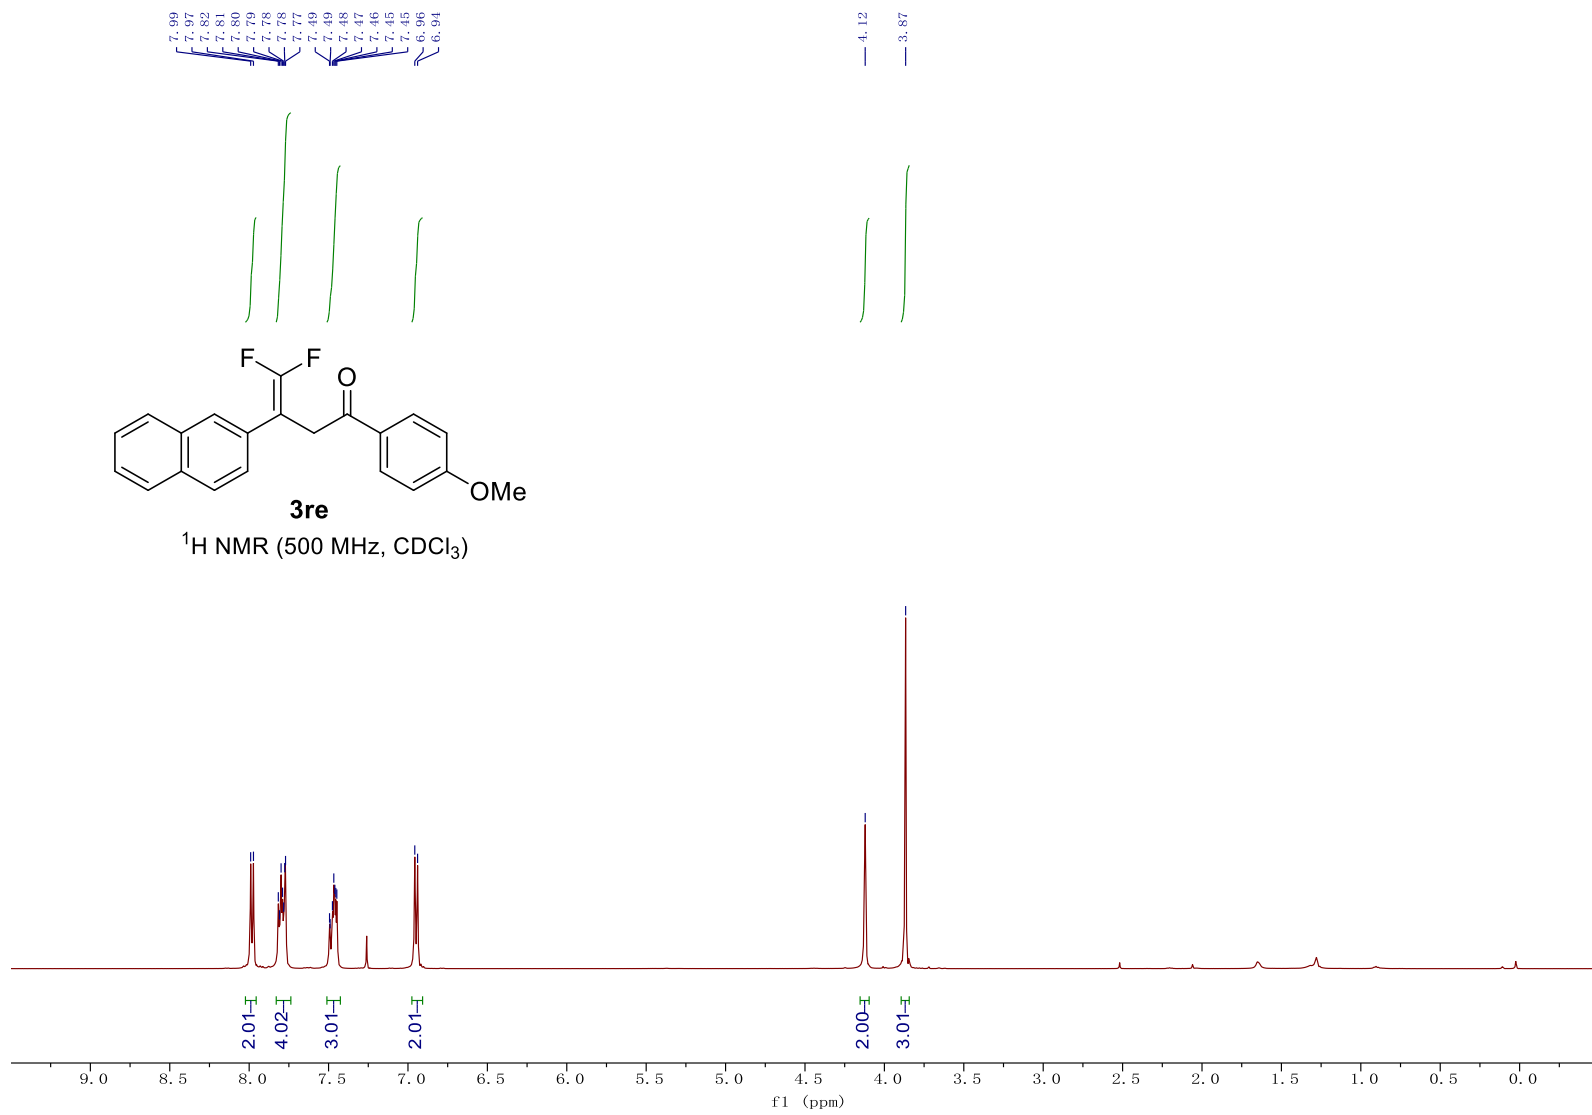

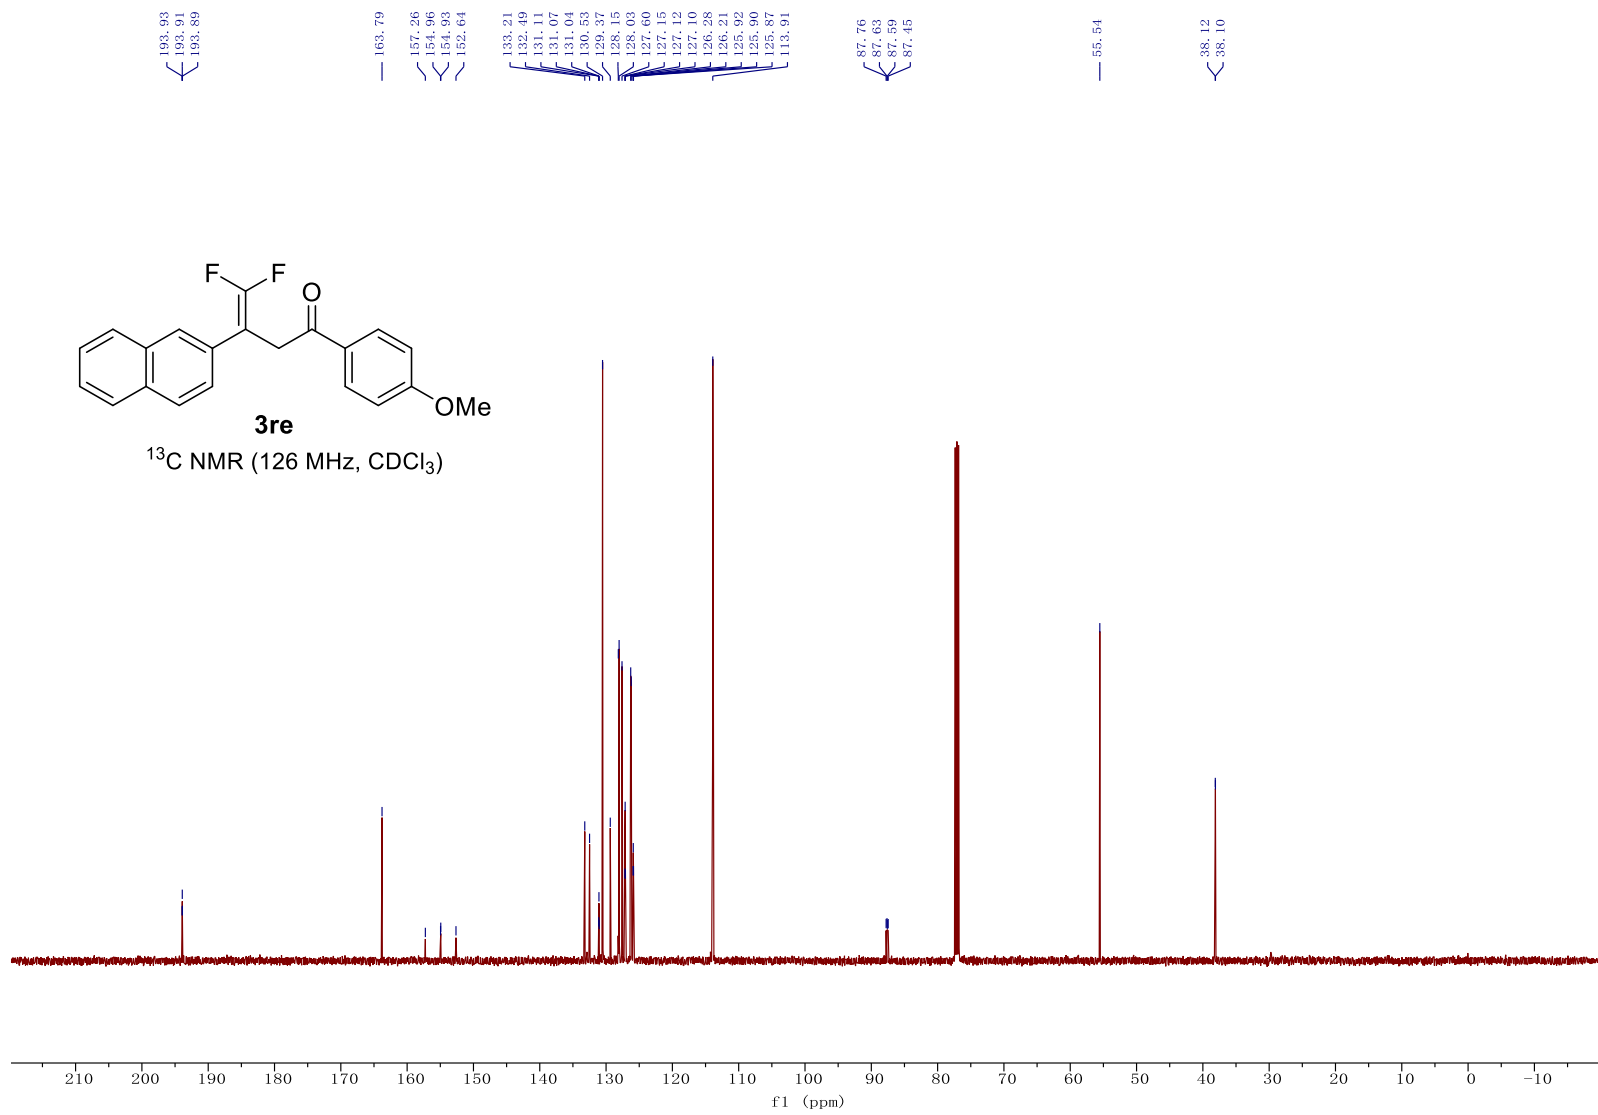

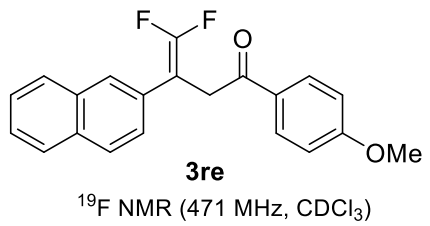

-87.69  
-87.76  
-88.89  
-88.97

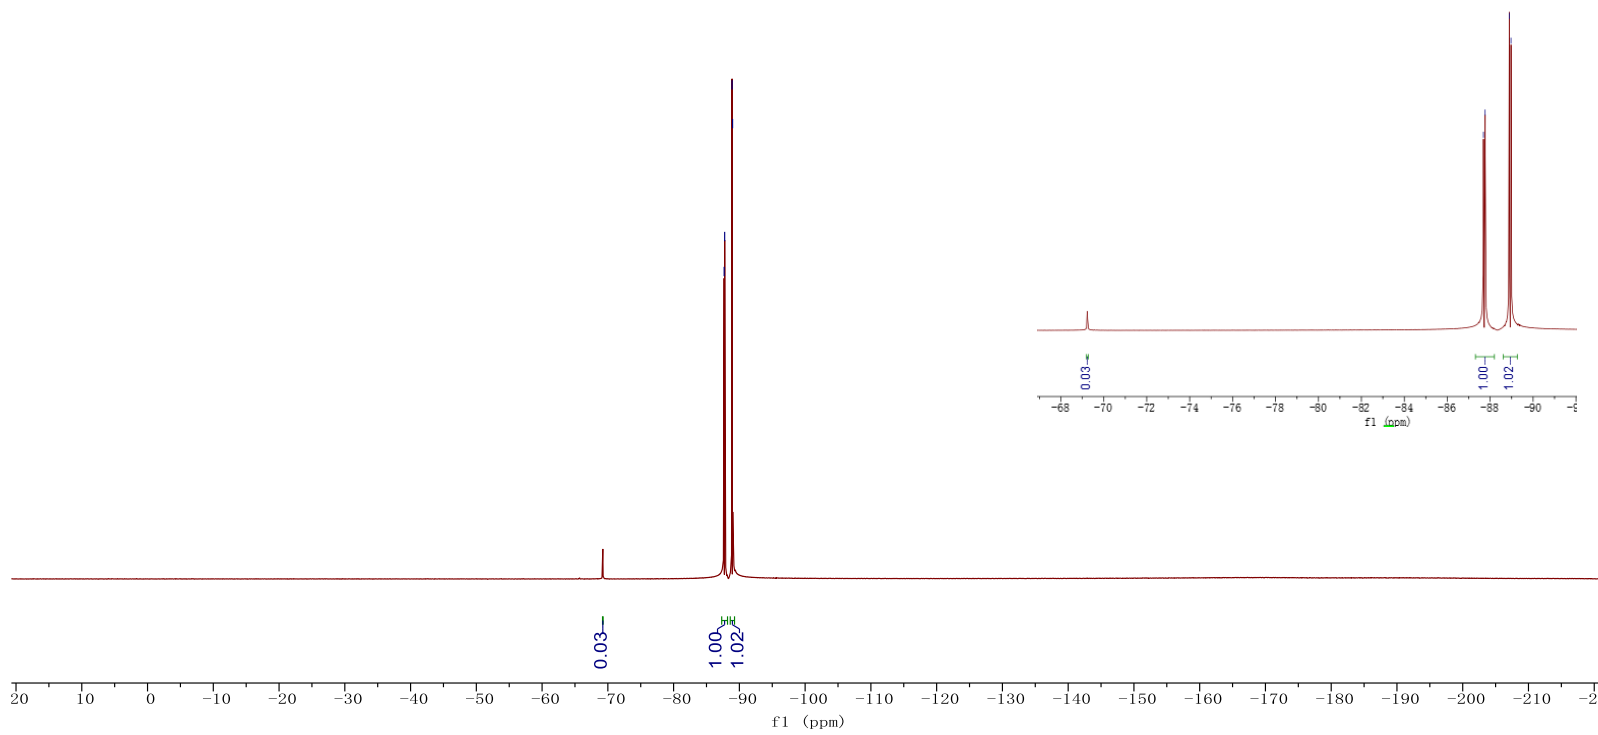

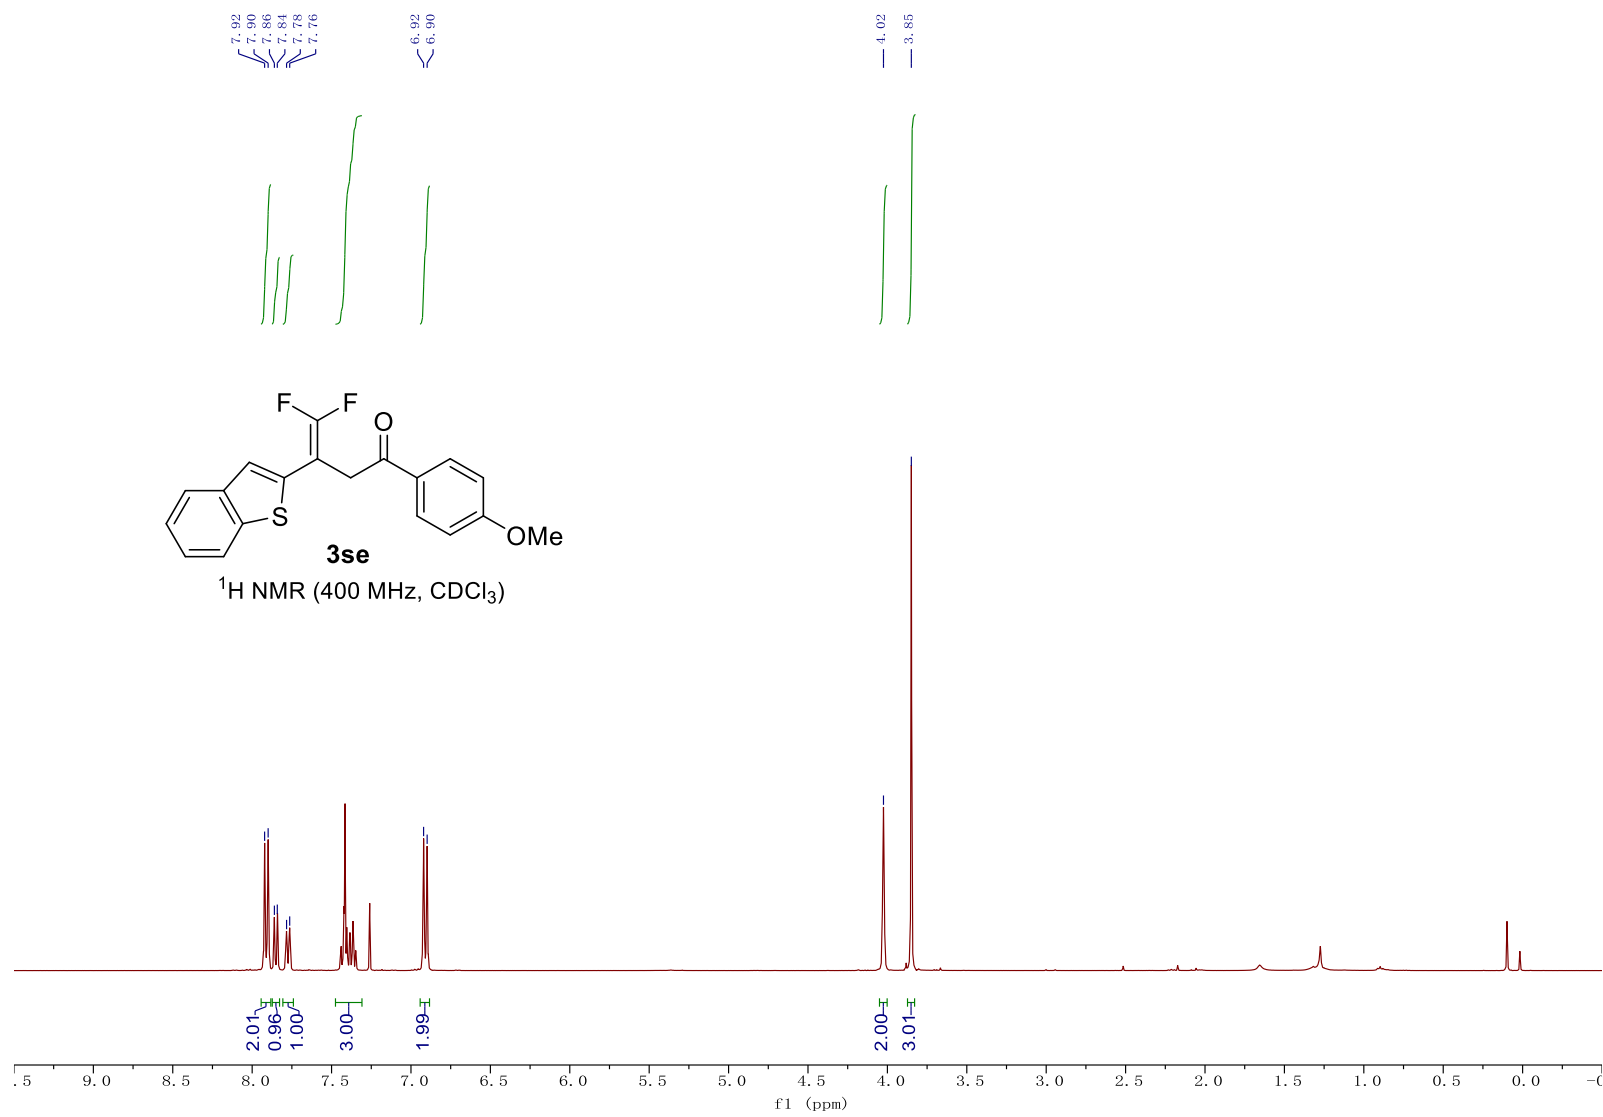

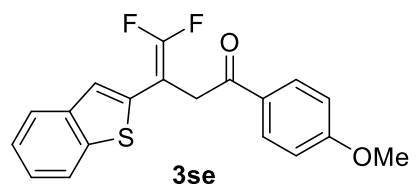

<sup>13</sup>C NMR (101 MHz, CDCl<sub>3</sub>)

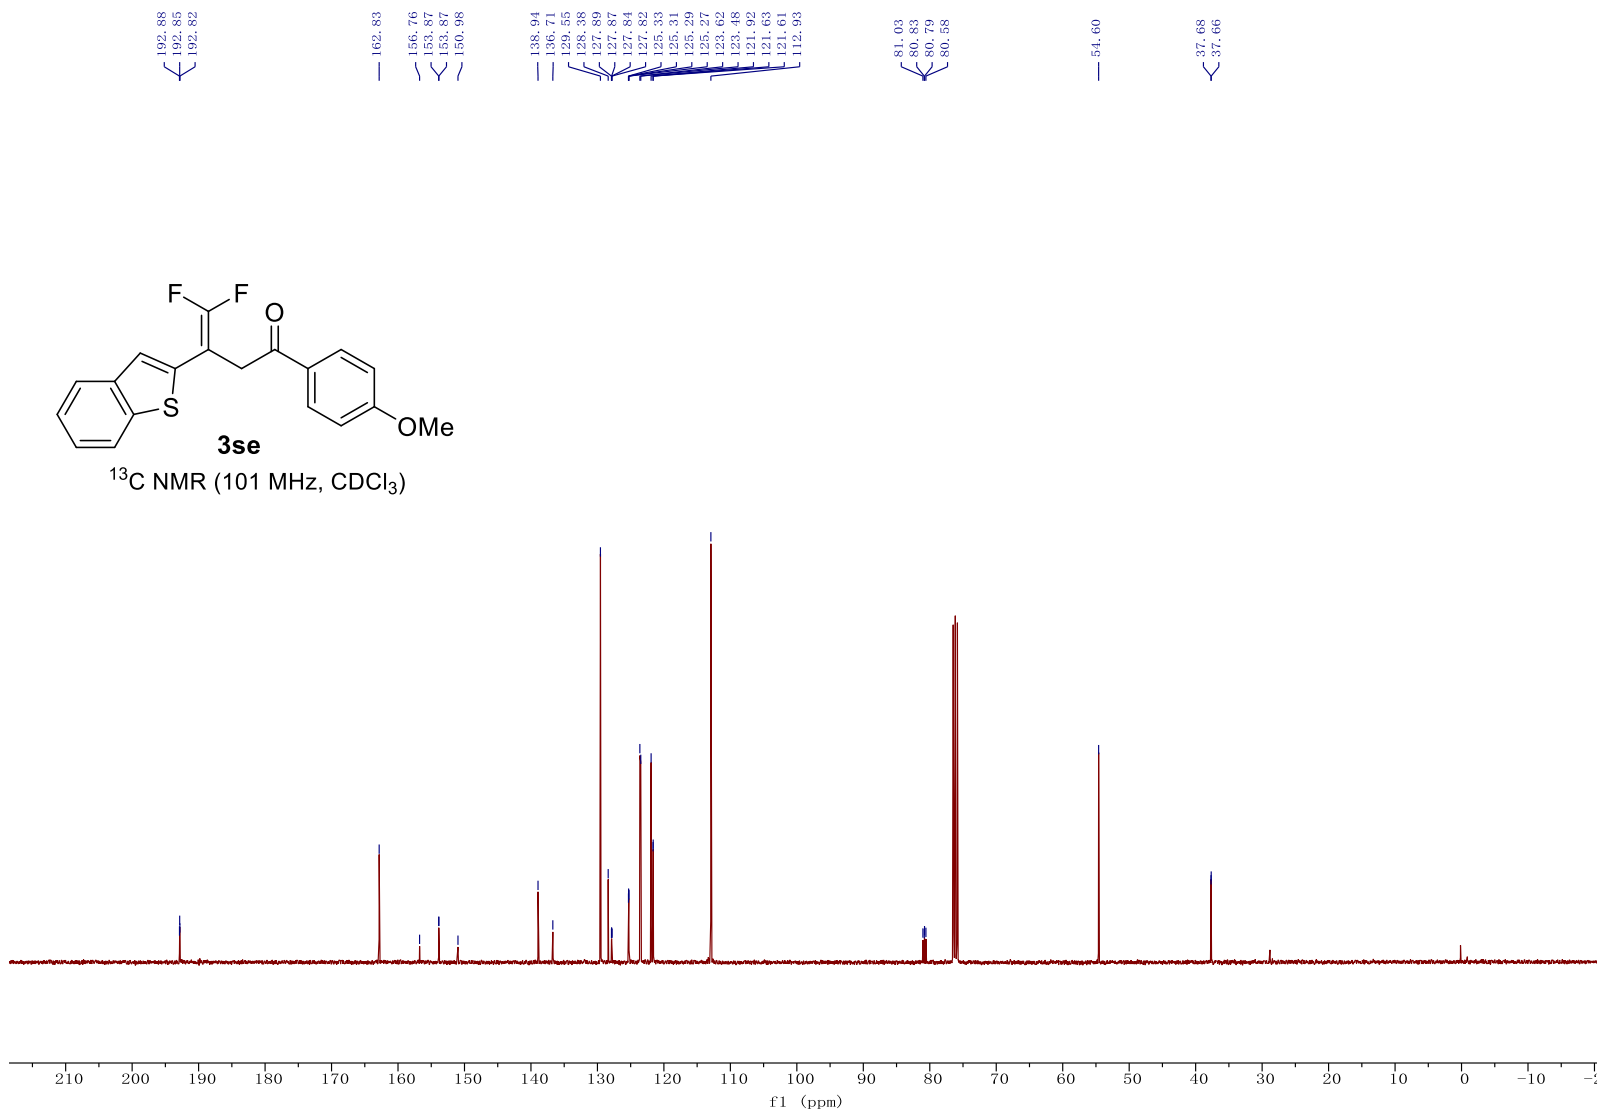

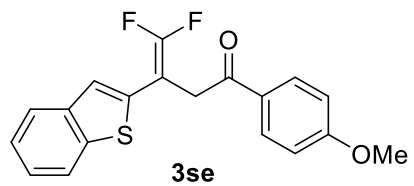

$^{19}\text{F}$  NMR (376 MHz,  $\text{CDCl}_3$ )

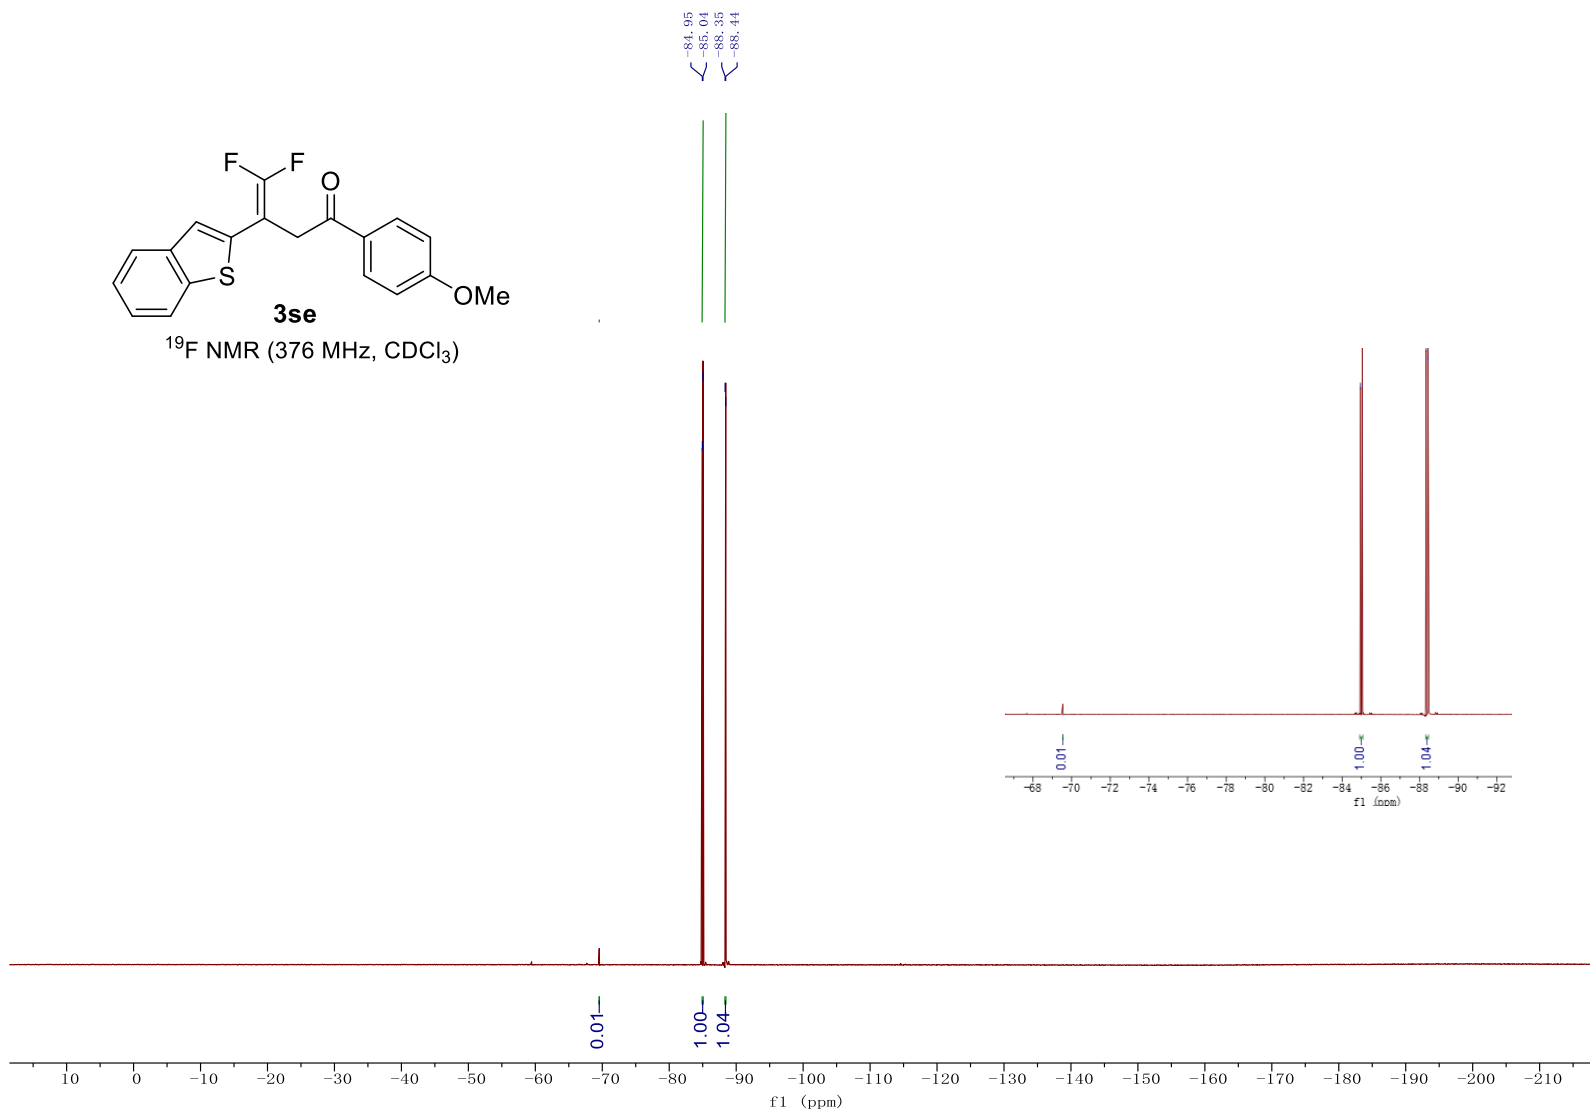

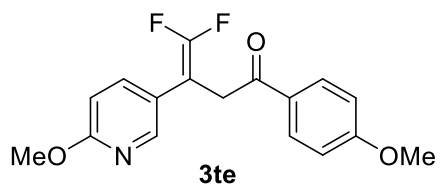

<sup>1</sup>H NMR (400 MHz, CDCl<sub>3</sub>)

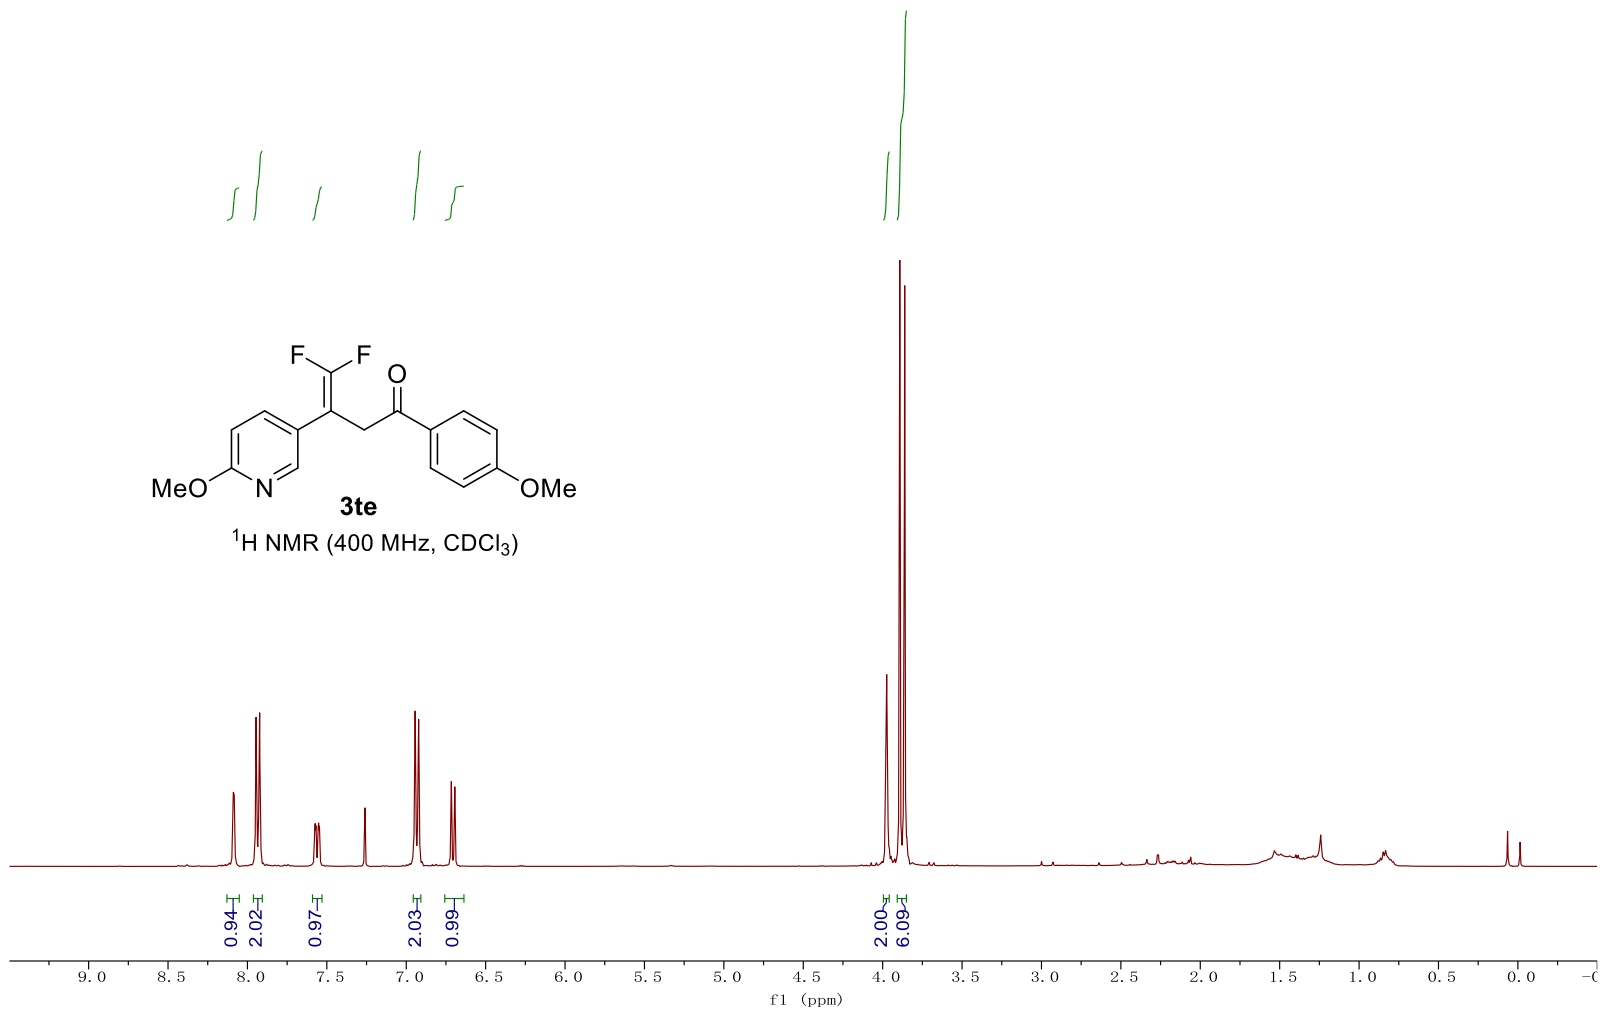



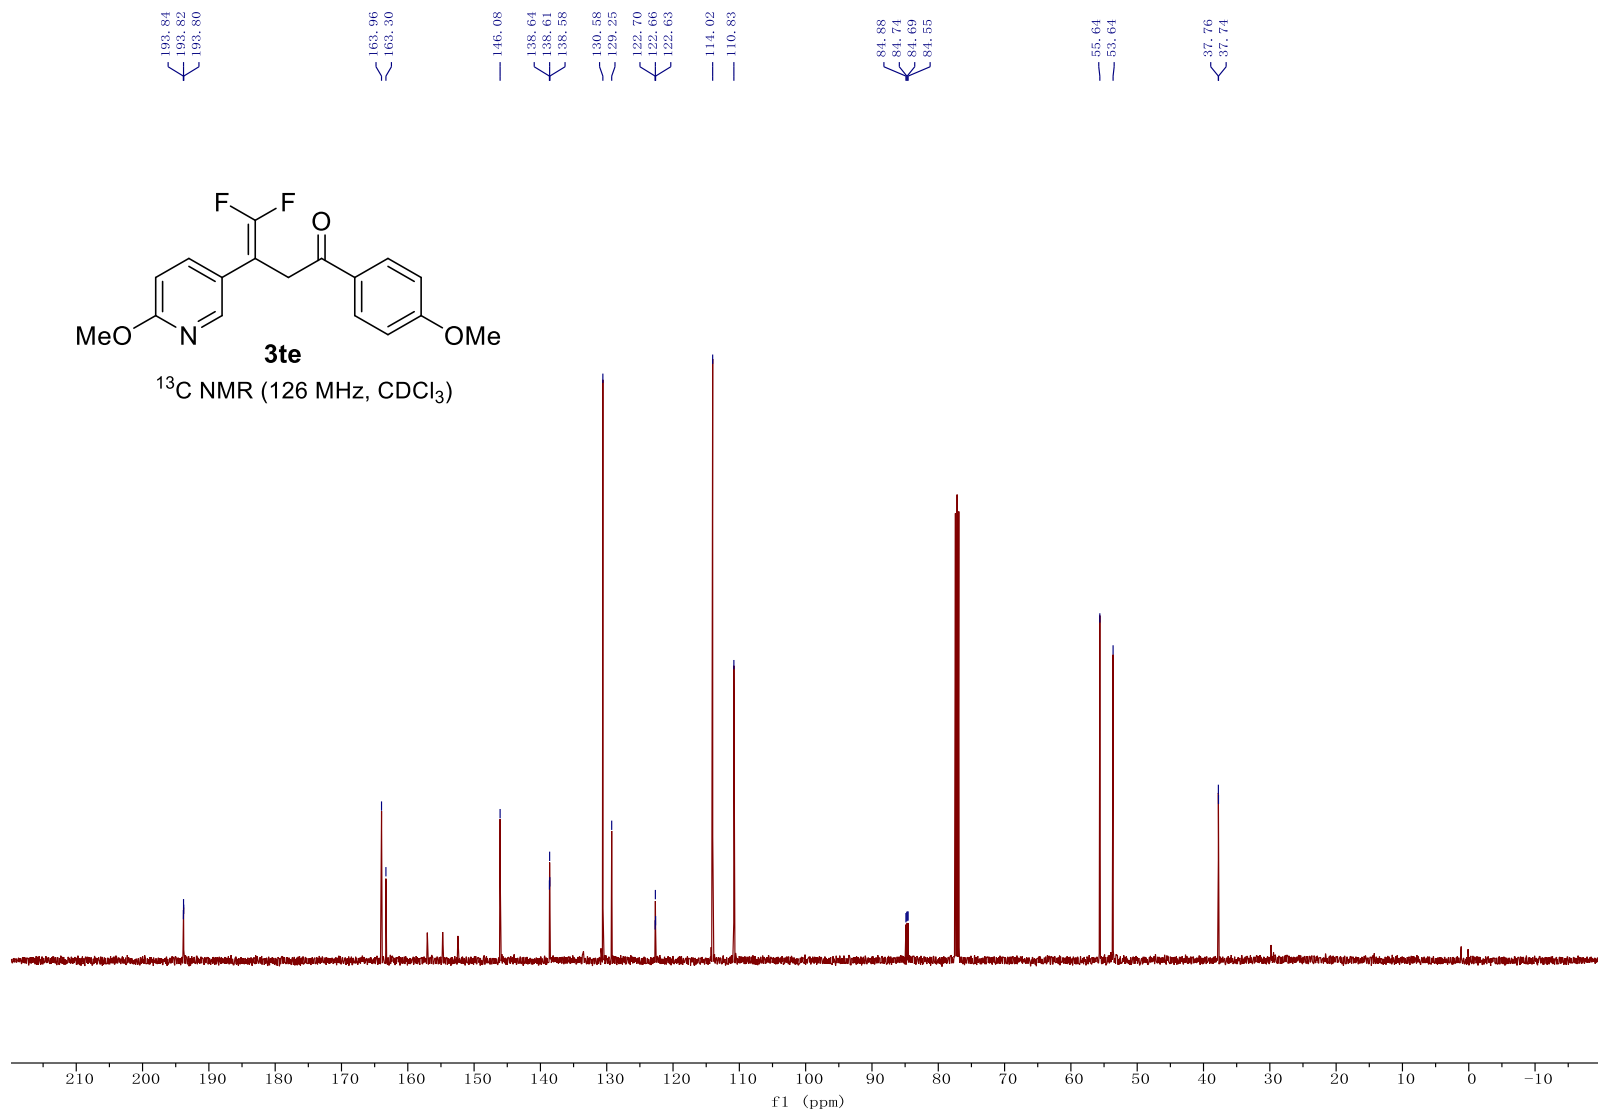

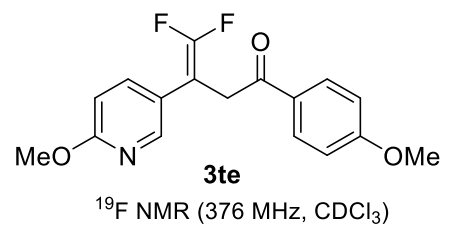

-88.13  
-88.23  
-88.91  
-89.01

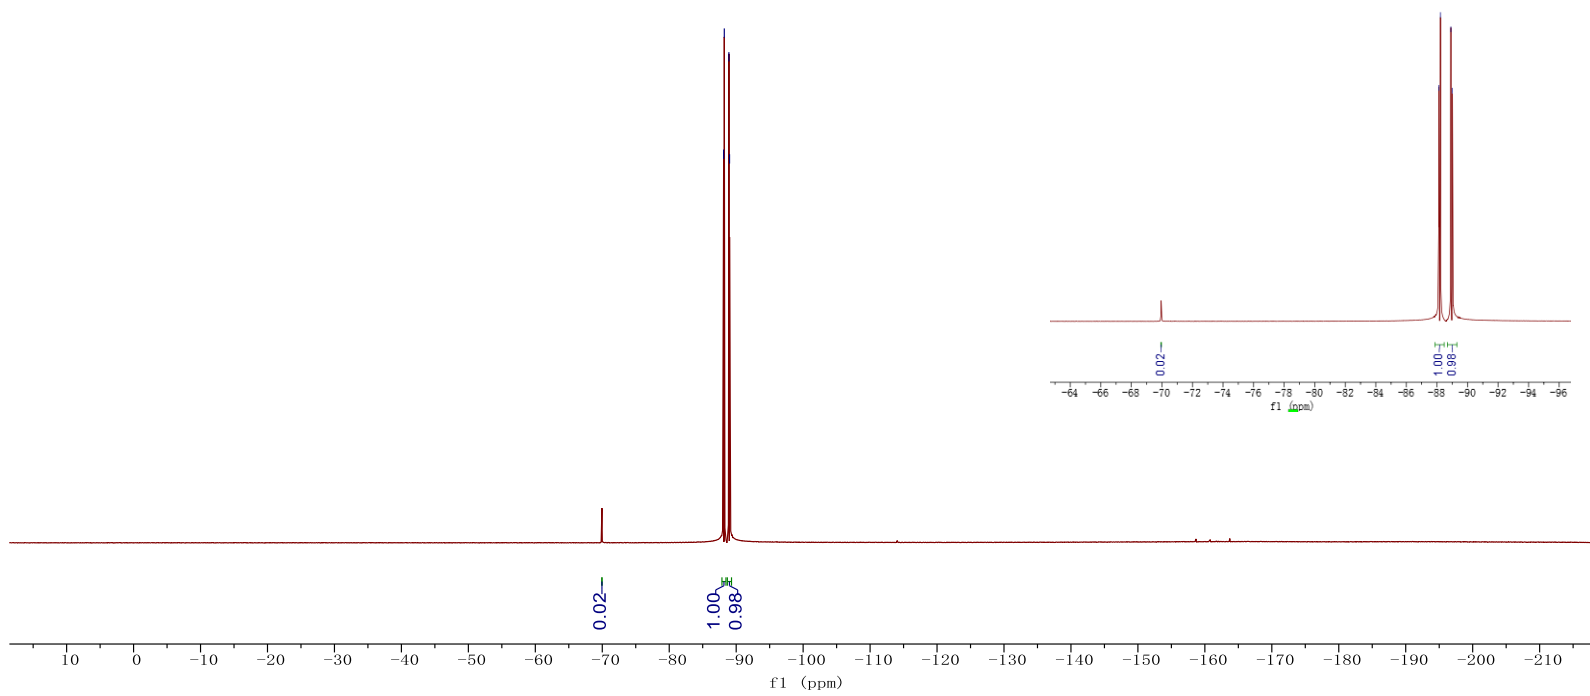

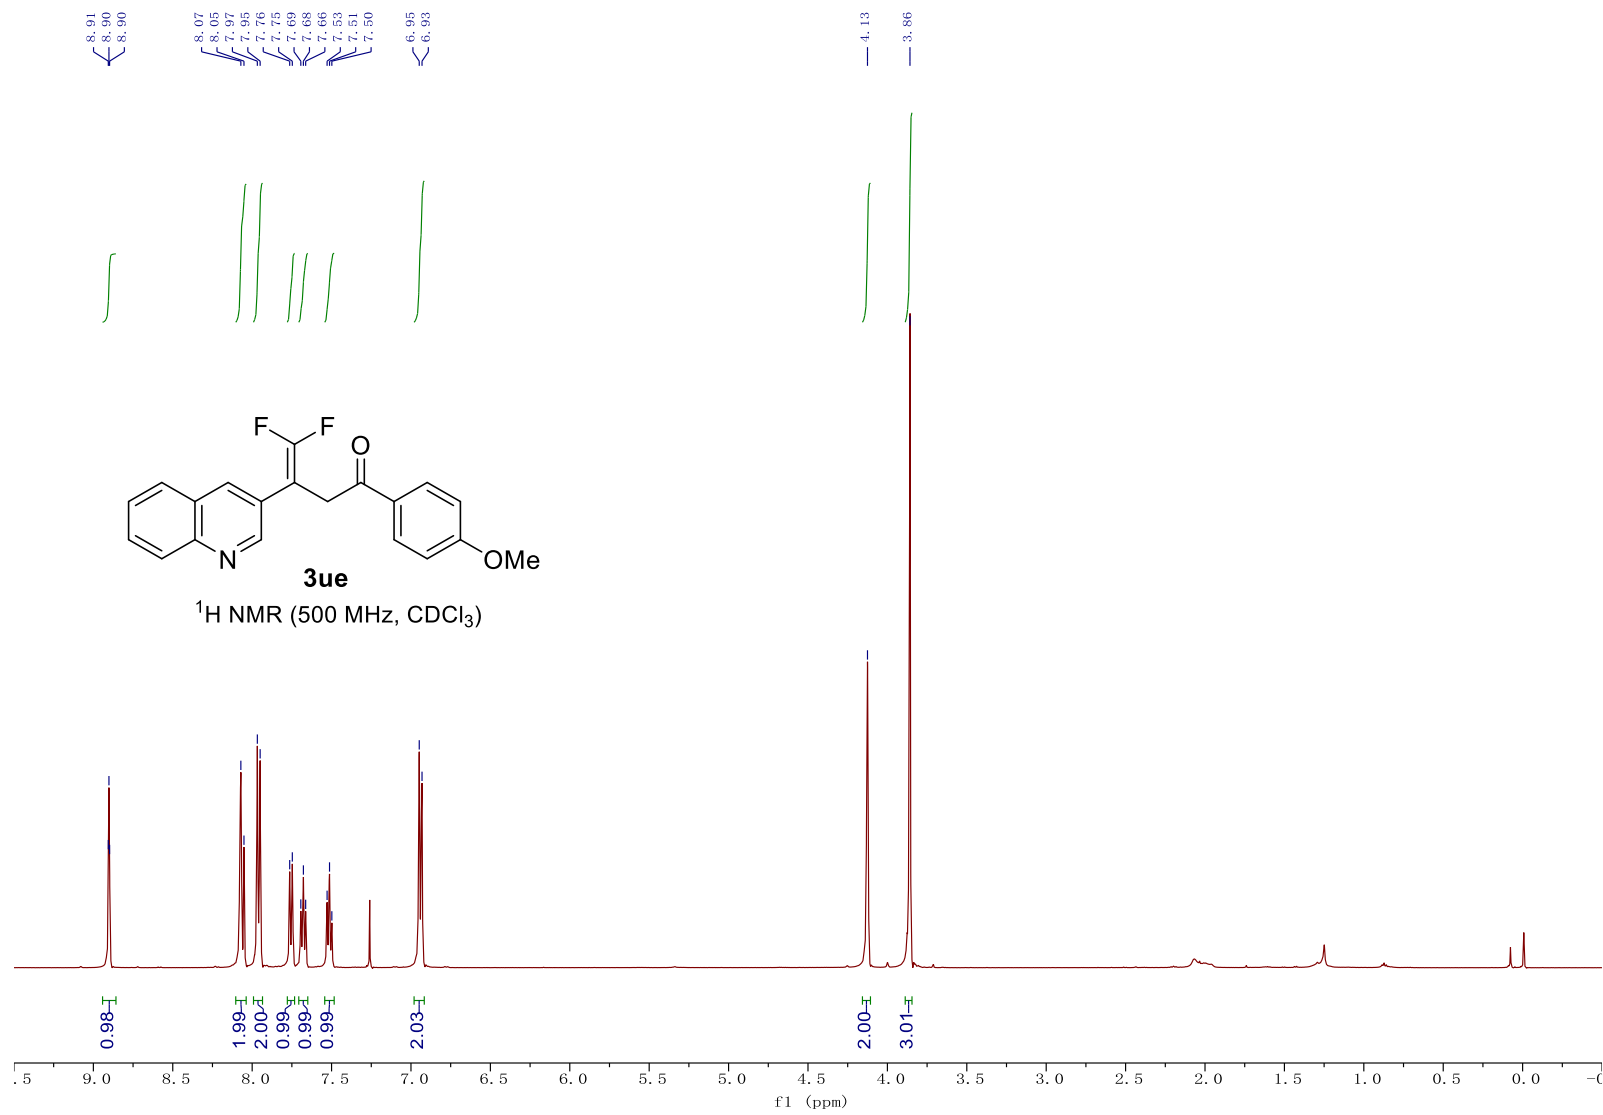

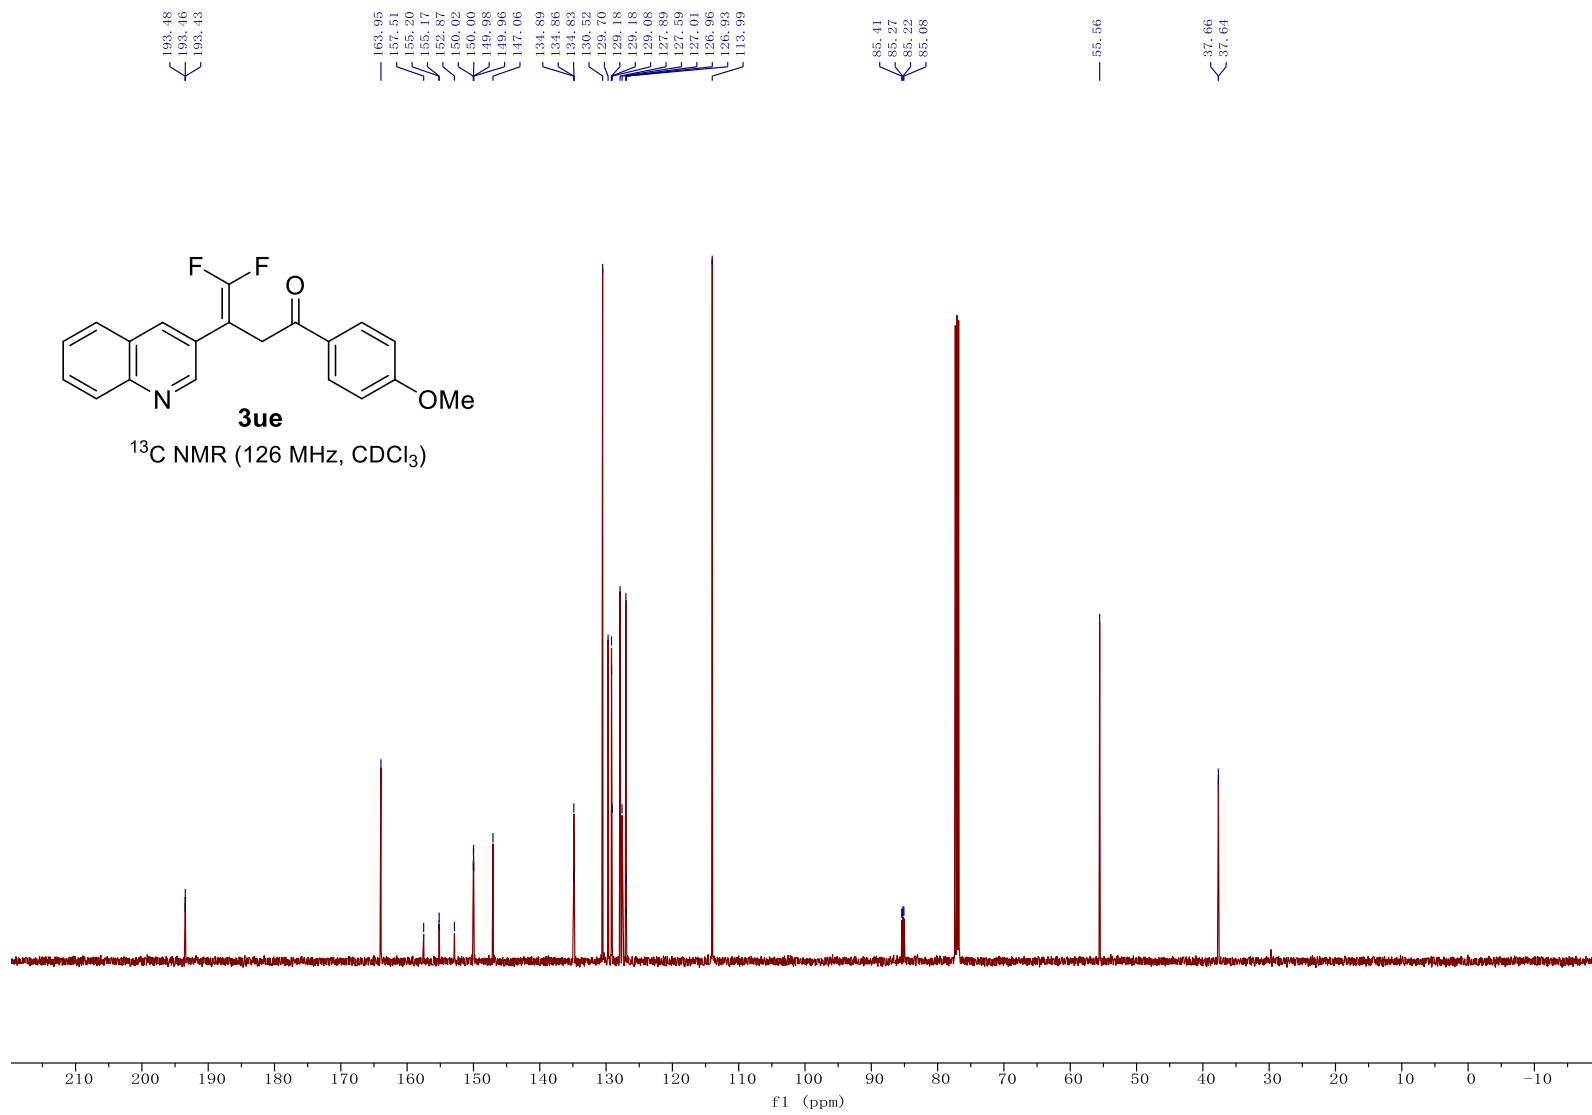

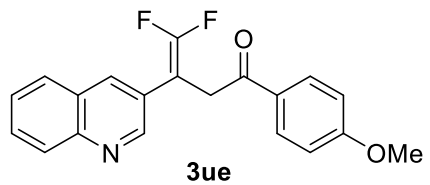

<sup>19</sup>F NMR (471 MHz, CDCl<sub>3</sub>)

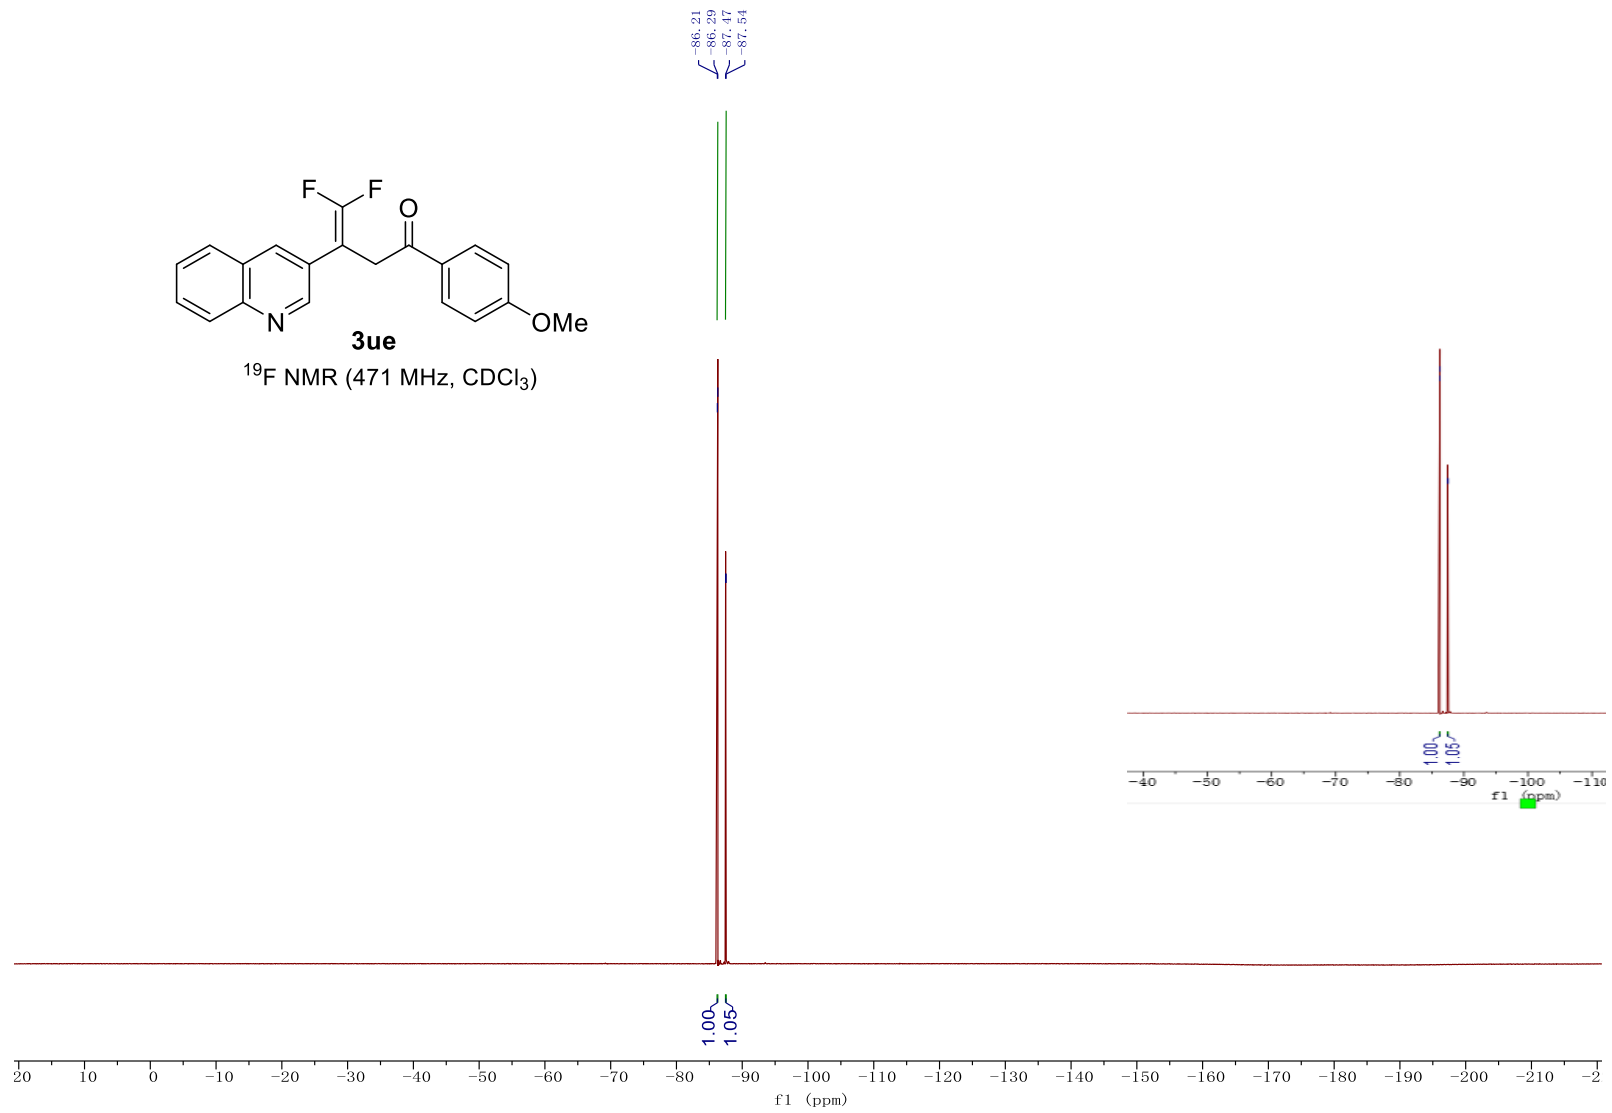

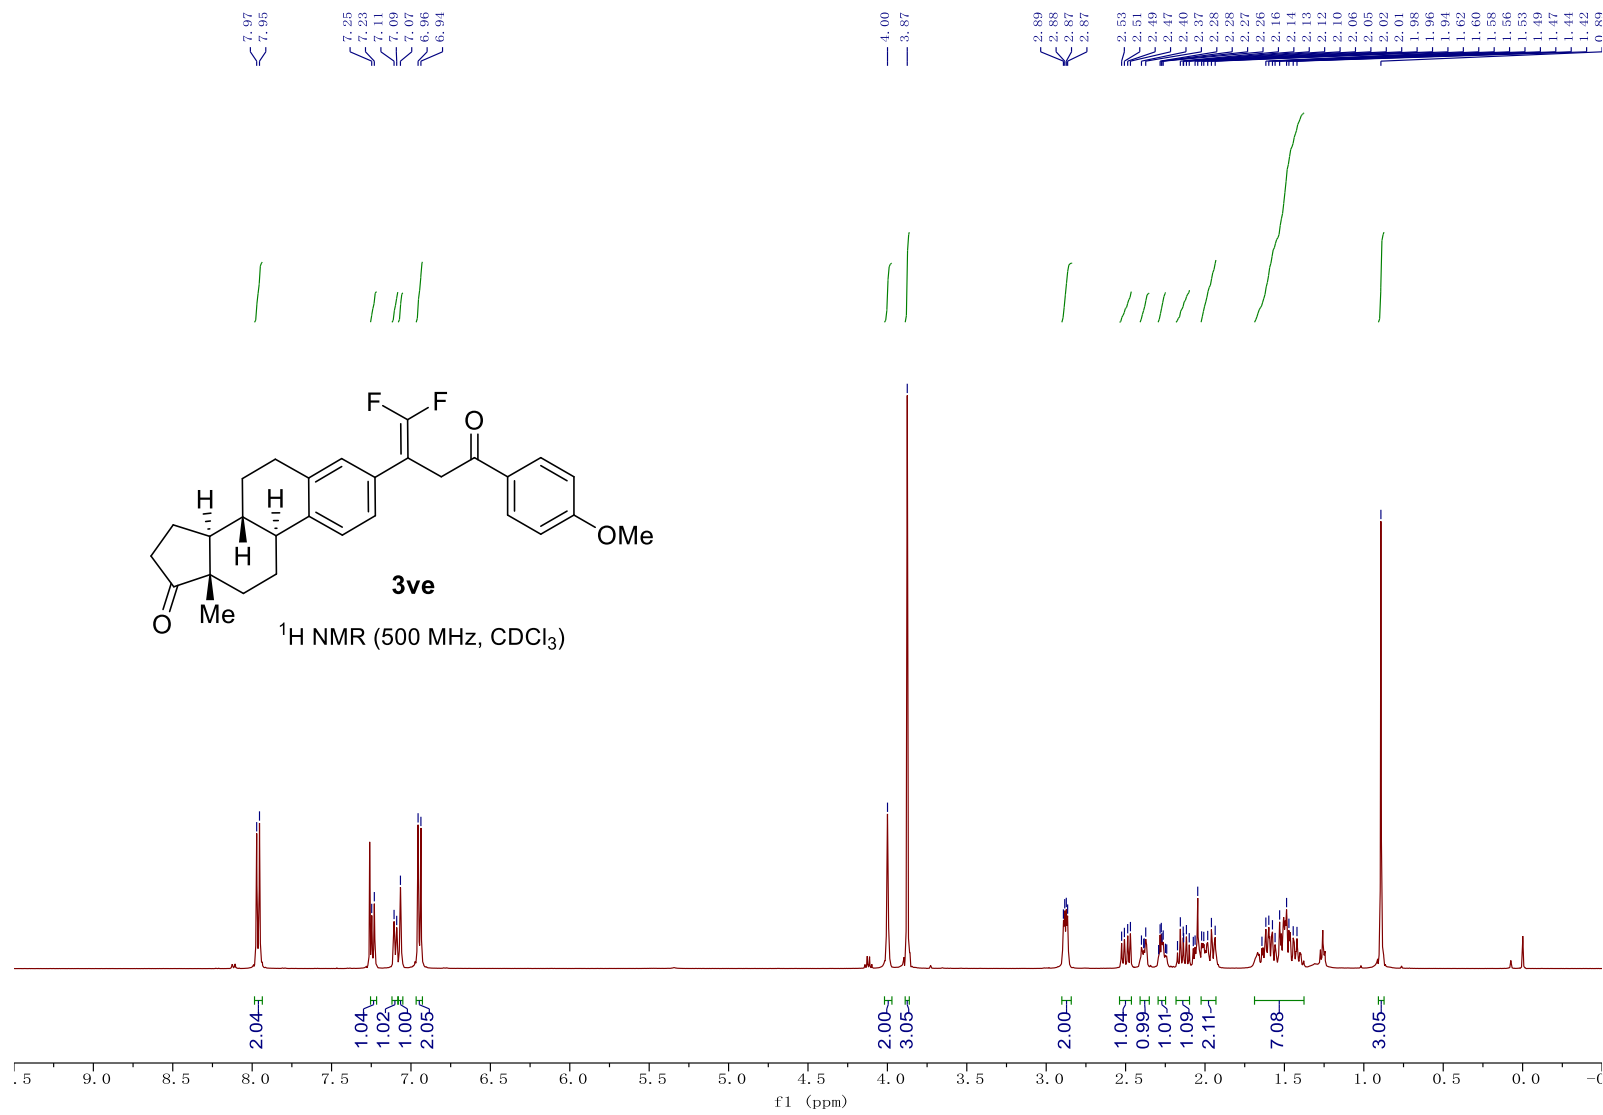

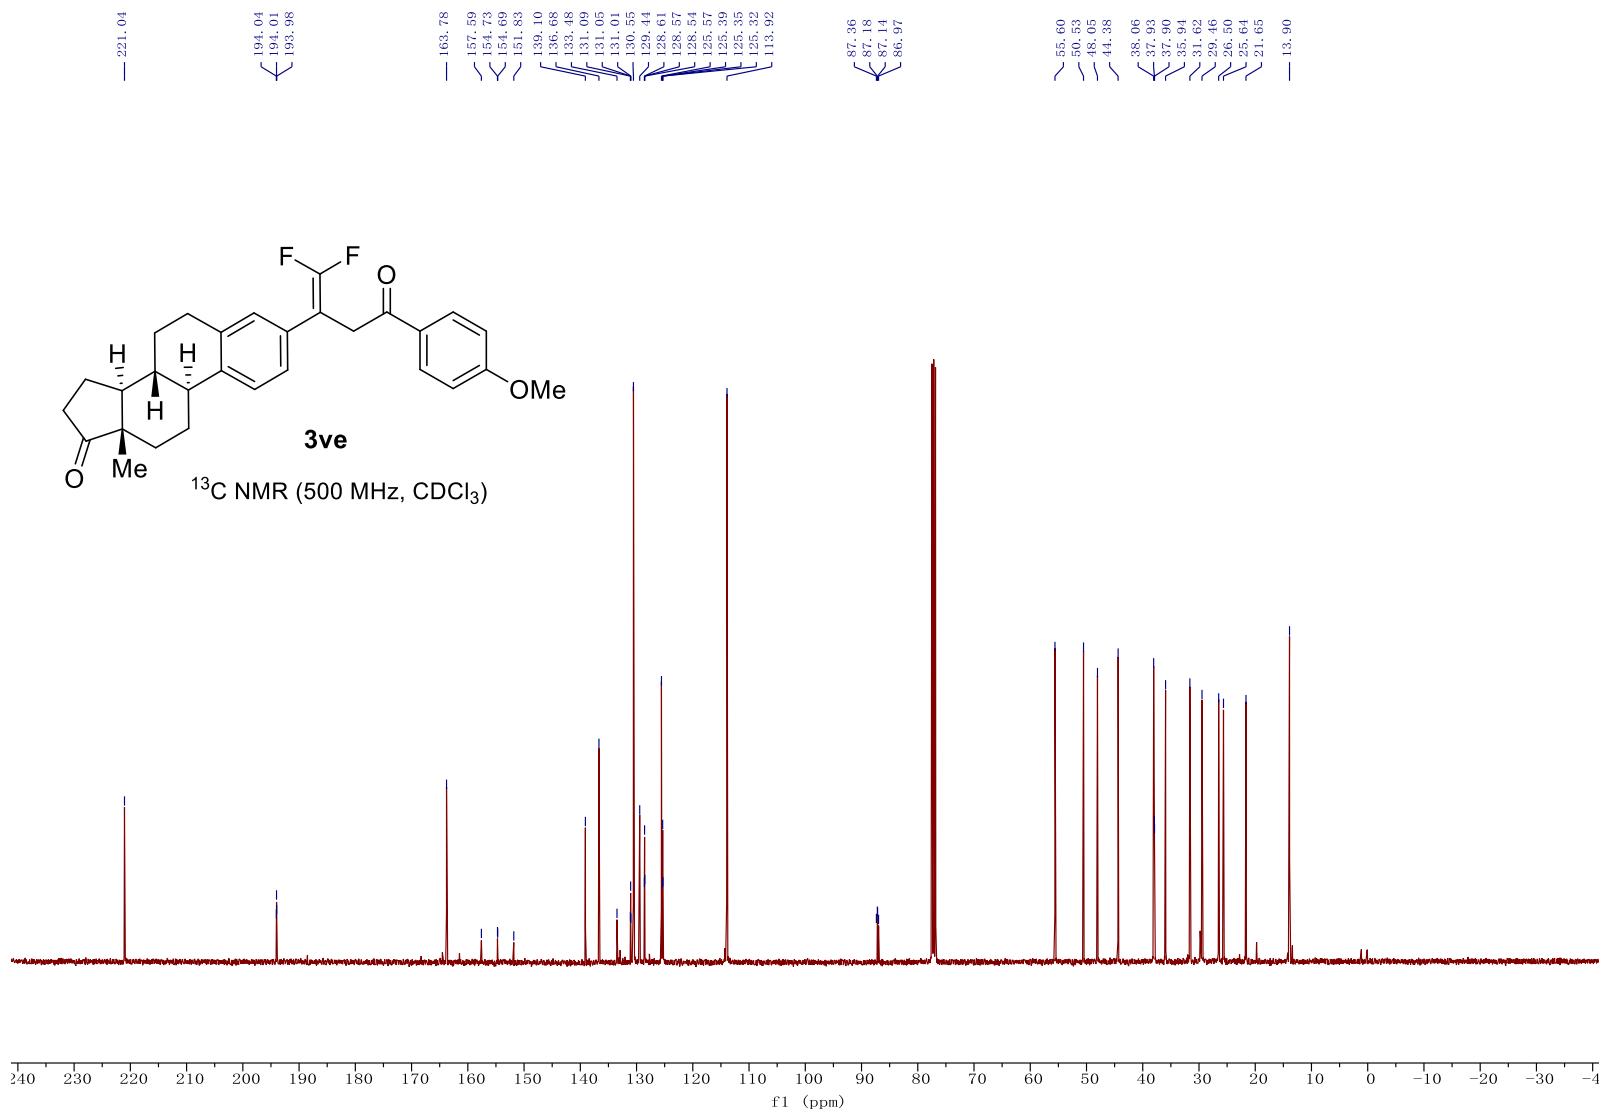

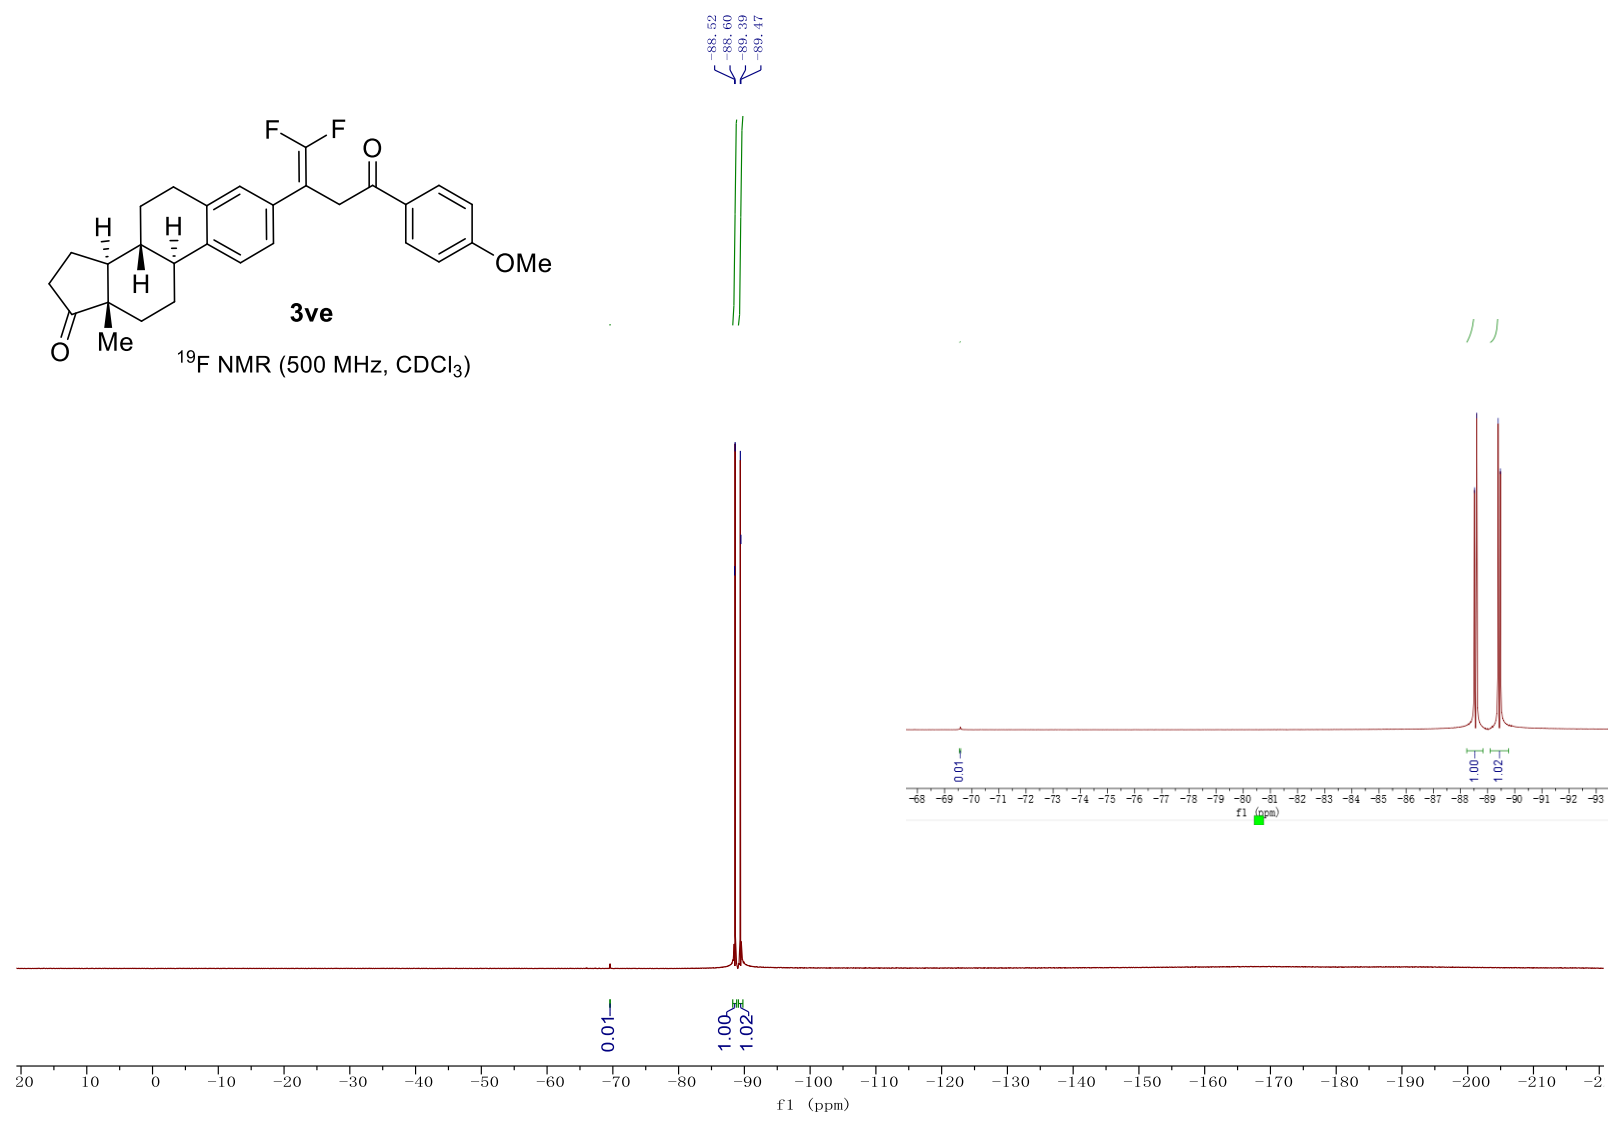



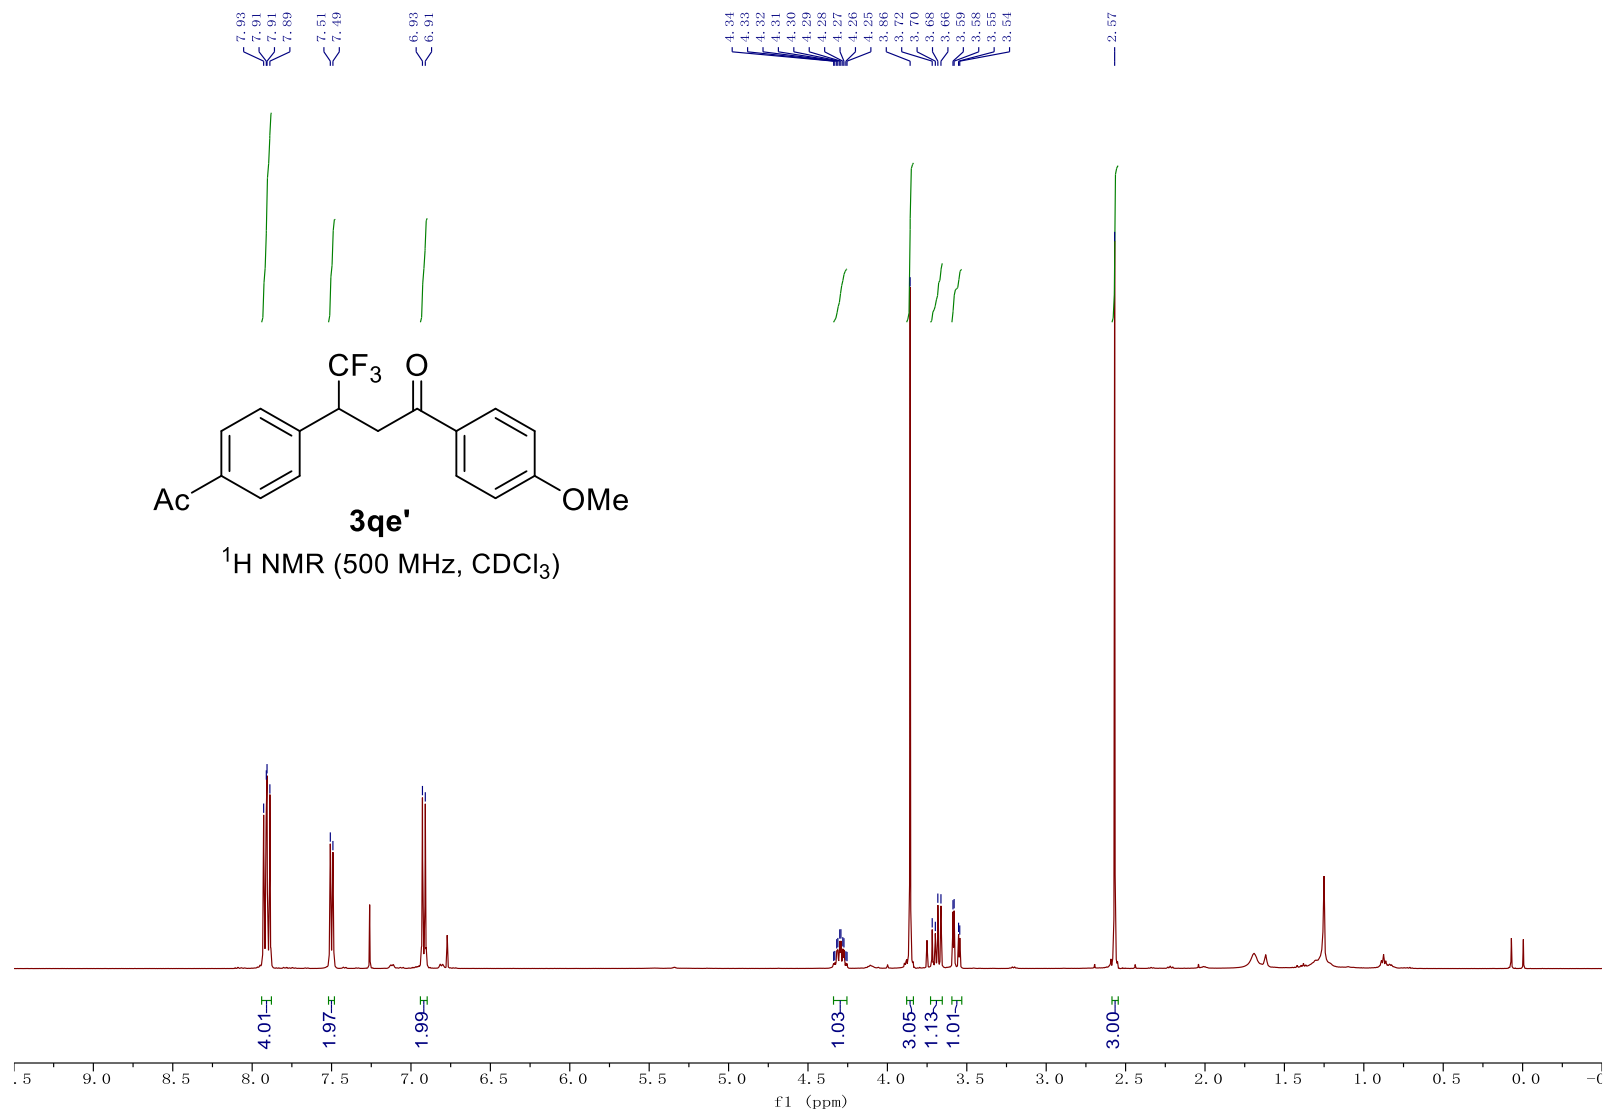

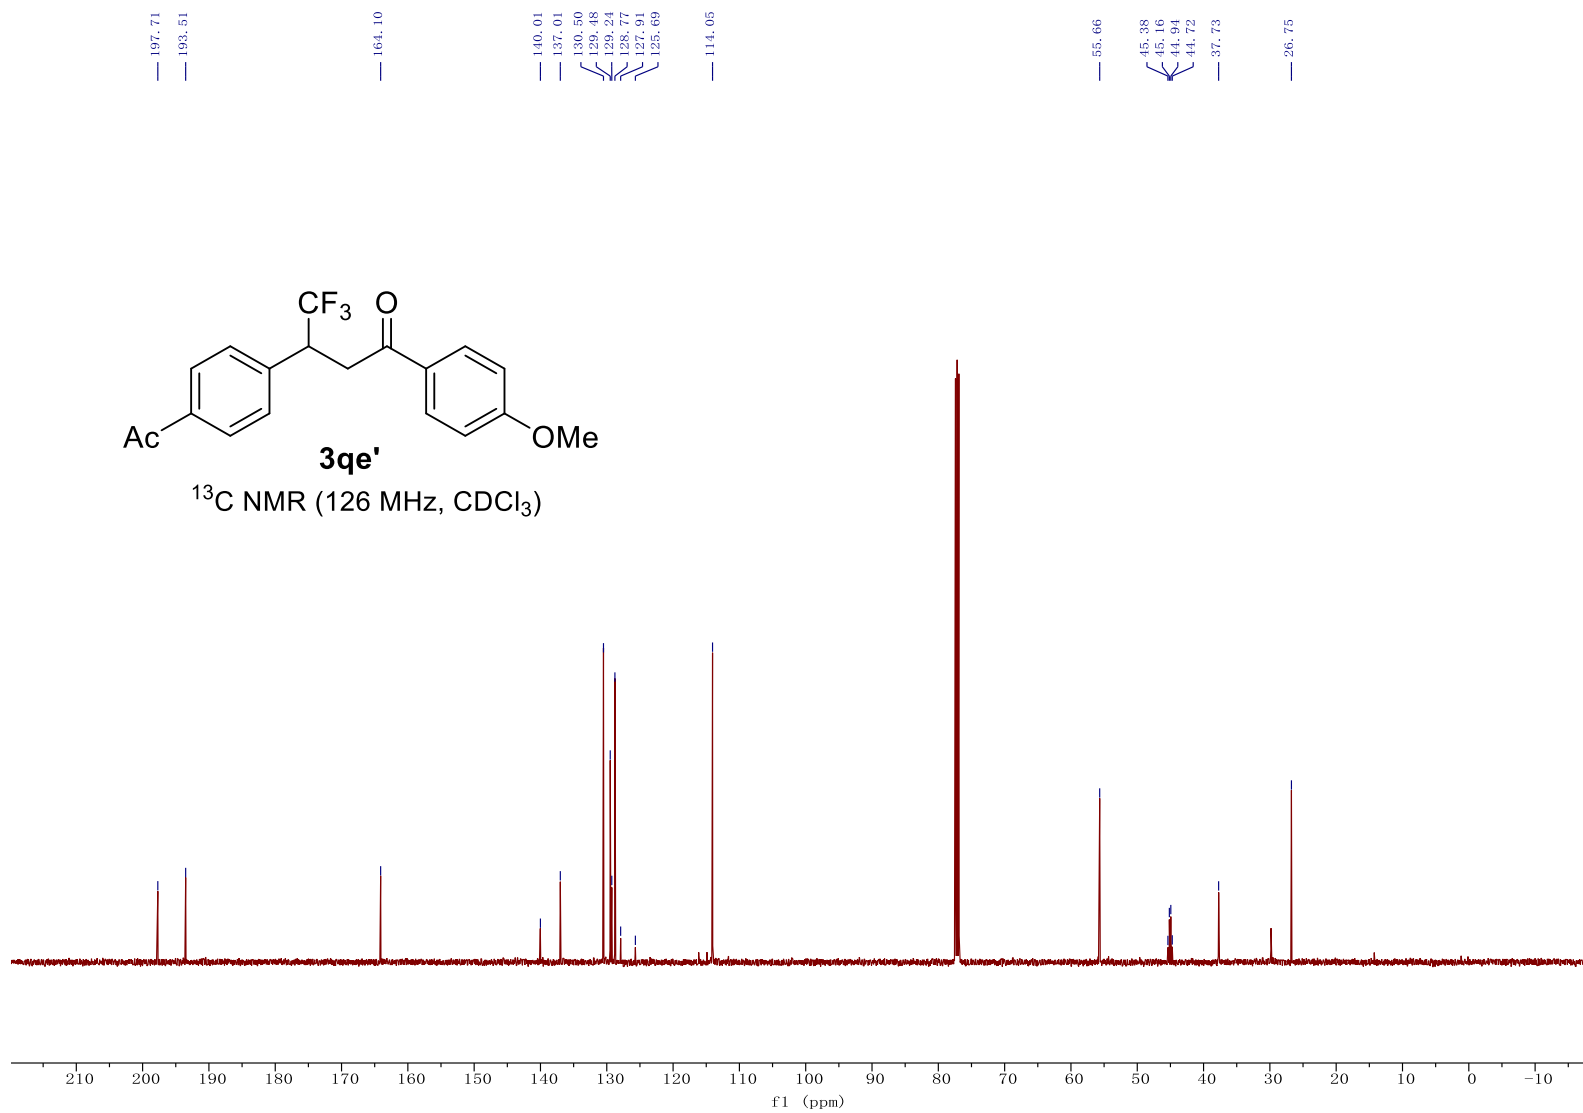

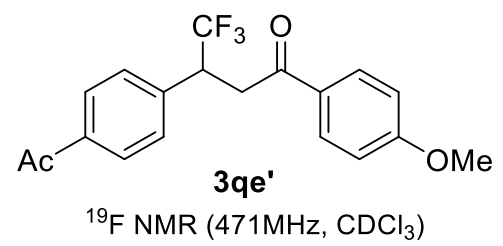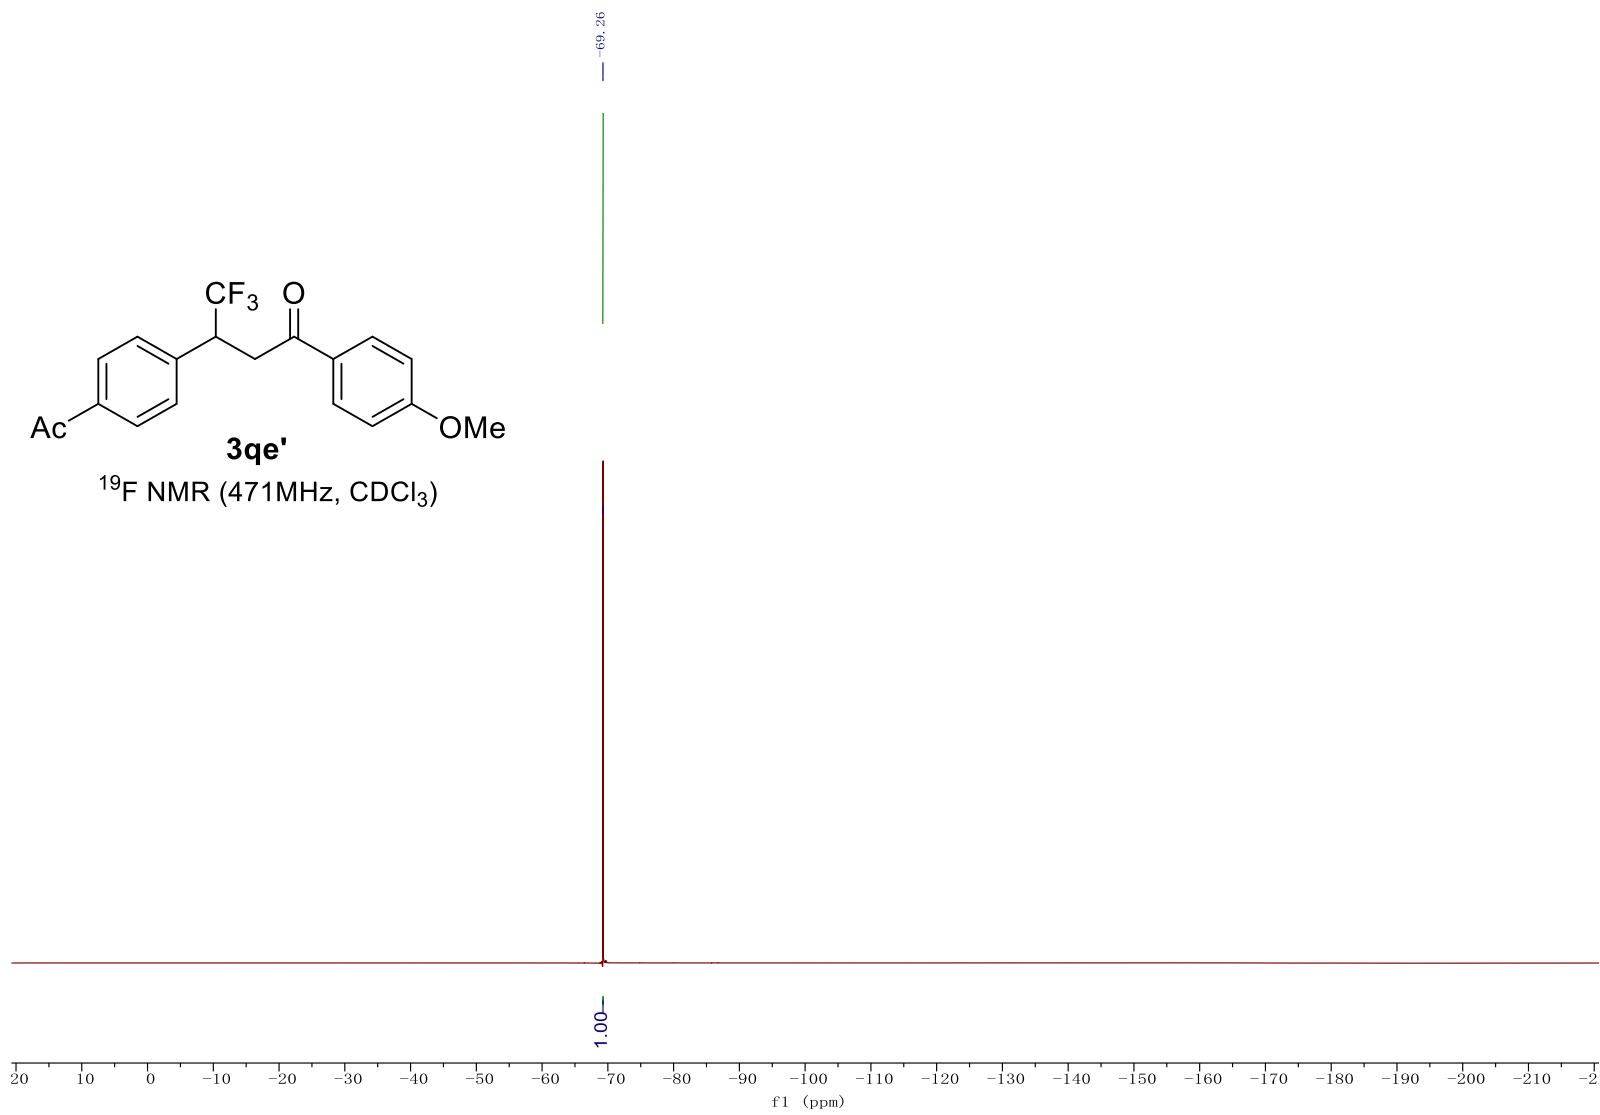

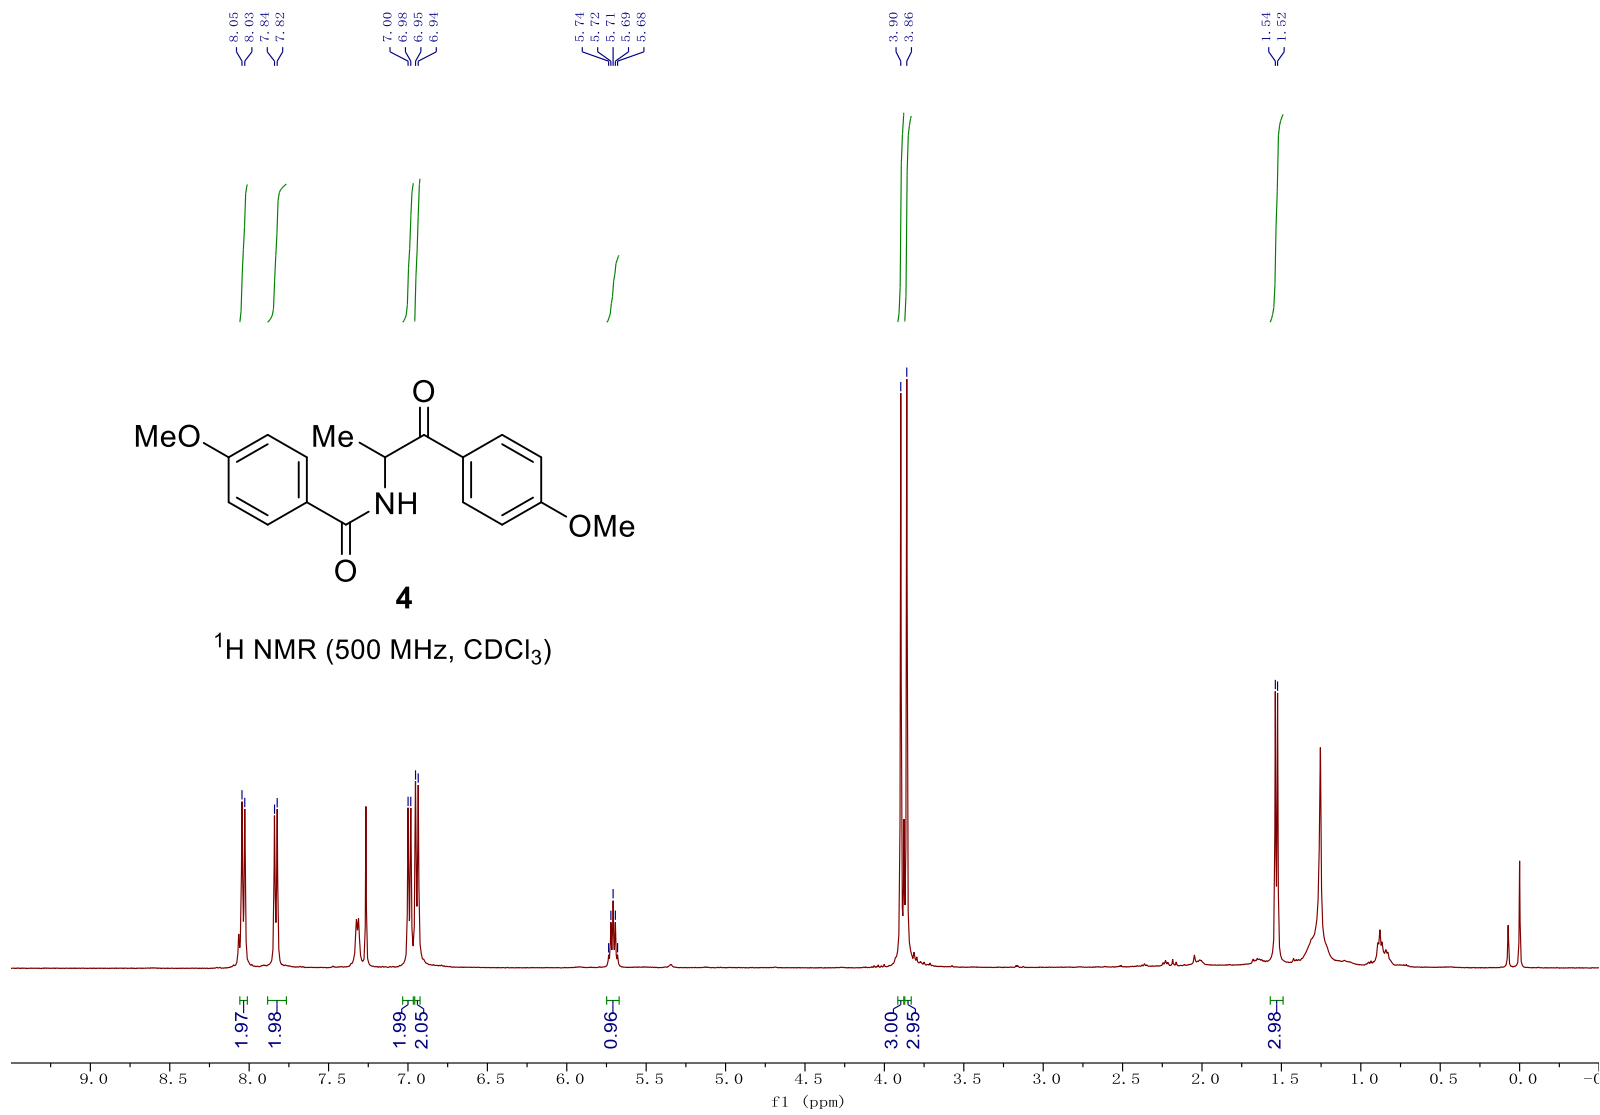

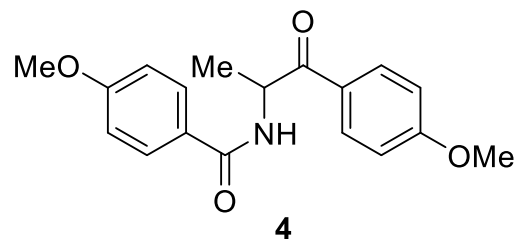

$^{13}\text{C}$  NMR (126 MHz,  $\text{CDCl}_3$ )

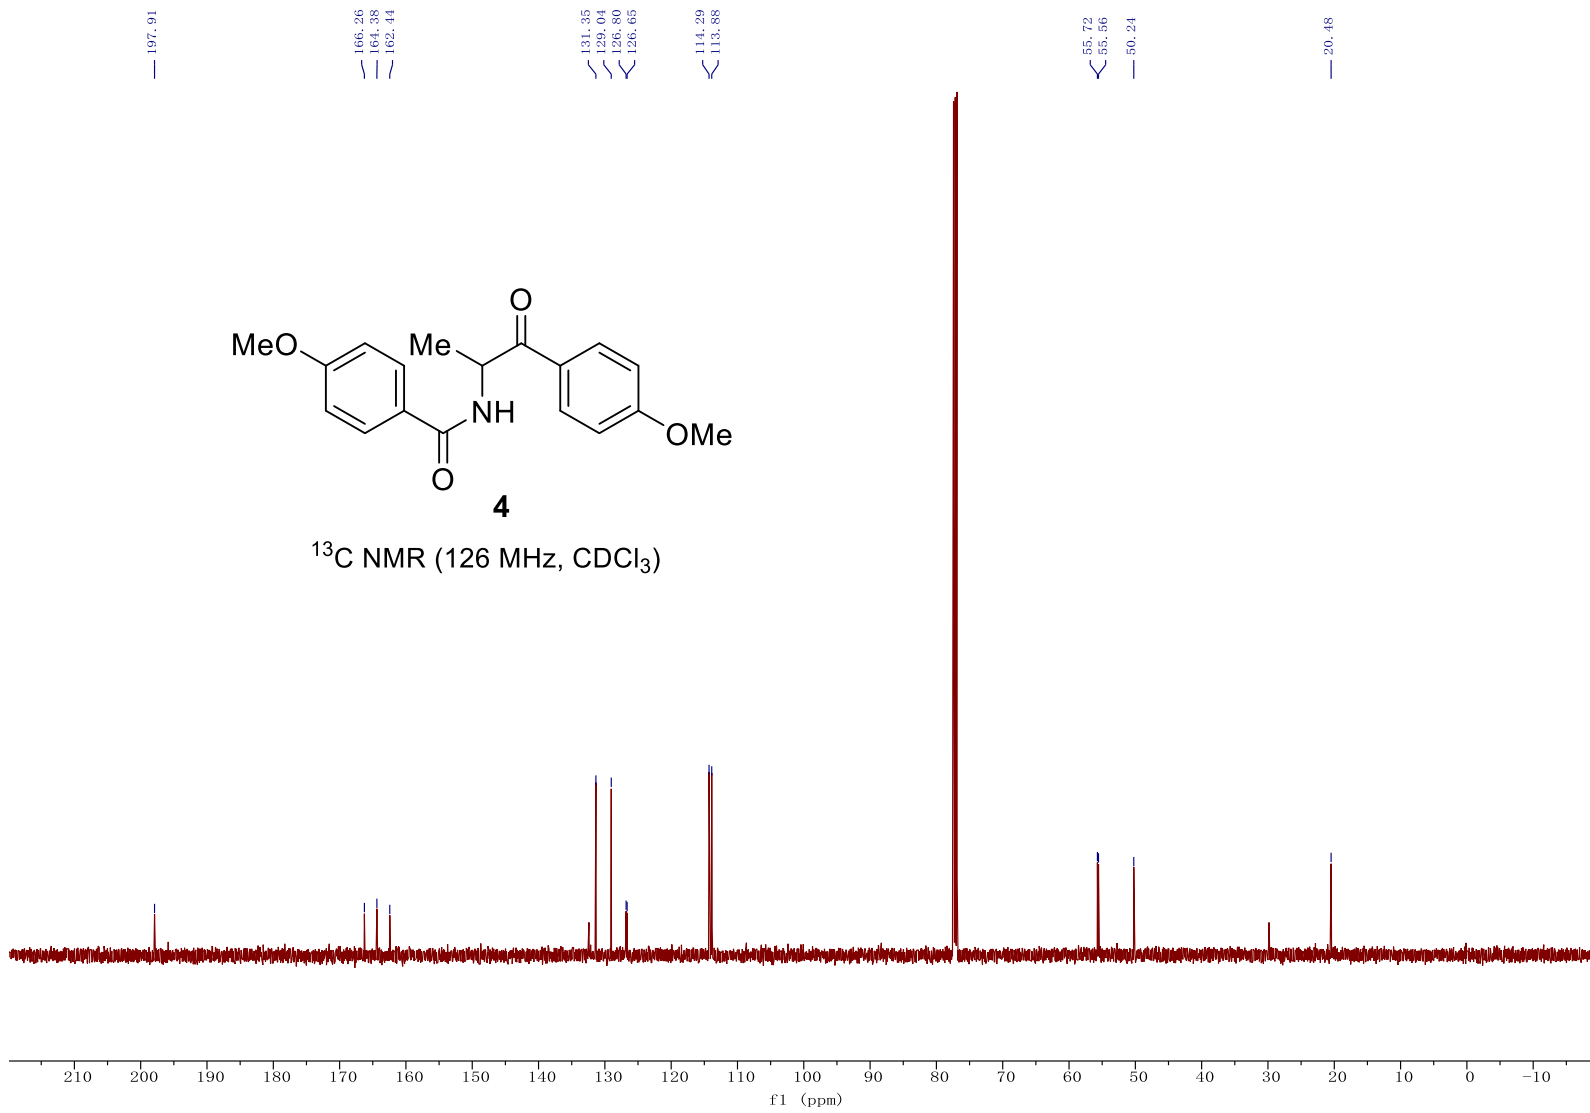

Supplement: d3qo01331f1.pdf [file d3qo01331f1.pdf]
